# Supplementary material for: New genetic tools for mushroom body output neurons in Drosophila
Source: eLife. 2024 Jan 25;12:RP90523. doi: 10.7554/eLife.90523 (PMC10945696; doi:10.7554/eLife.90523)
Supplement: Figure 2—source data 1. [file elife-90523-fig2-data1.xlsx]

## Sheet: Sheet1
Line	Test1	test2	Speed_Pre (mm/s)			Angular (degree/s)			Cos(upwind angle)			Delta_DistanceFromCenter	Return_probability
			Pre-LED	LED-ON	LED-OFF	Pre-LED	LED-ON	LED-OFF	Pre-LED	LED-ON	LED-OFF
SS81353	-0.316875	-0.61475	0.860363	1.08173	1.05287	55.3089	123.106	70.335	-0.031898	0.068925	0.195897	0.007916	0.040777
SS81521	-0.277	-0.576286	0.752828	1.1405	1.08601	43.5165	119.836	67.4281	-0.032862	0.06485	0.155108	0.0165695	0.034084
SS77450	-0.170091	-0.451818	1.06727	2.04499	1.35007	56.1313	144.473	76.6274	-0.063911	0.064821	0.069227	0.0573765	0.0532195
SS67662	-0.052375	-0.4195	1.27888	2.29662	1.24777	52.3195	156.589	61.6562	-0.077359	0.097038	0.0147595	0.0934365	0.037293
MB077B	-0.00408333	-0.0905833	0.89204	1.99303	1.10253	41.9628	87.7529	87.5831	-0.117	0.135986	-0.072819	0.168129	0.0900455
SS67741	0.0906	-0.0875	0.802296	2.38844	1.06867	38.6303	100.306	84.1989	-0.085479	0.065002	0.047575	0.096049	0.046946
SS67728	0.0517	-0.0358	1.05956	2.52734	1.31849	53.9042	116.369	83.506	-0.077647	0.010022	0.090526	0.001112	0.0651335
SS95105	0.0268	-0.0136	1.30796	2.36968	1.49598	59.0897	147.587	83.1591	-0.028892	0.128472	0.052472	0.112947	0.052173
SS80974	0.0705	0.003	1.27313	2.06974	1.20077	65.6551	91.2907	95.6676	-0.083661	0.069467	0.0296235	0.059811	0.047728
SS95118	0.0971575	0.00475	1.1854	1.86854	1.16359	52.1457	89.0963	80.5071	-0.033157	0.083019	0.0417555	0.0529065	0.0534315
Empty-split	0.063239	0.0114528	0.932309	2.20539	1.24074	52.6669	108.557	87.8646	-0.12077	0.088627	0.0457115	0.0988385	0.061051
SS67641	-0.003189	0.0122	0.896915	2.97151	0.944506	50.451	77.1968	77.5775	-0.132589	0.0236325	-0.0710375	0.125629	0.03563
SS52050	0.0488	0.0272	1.5336	2.72439	1.09344	83.7797	122.184	92.8548	-0.04316	0.105617	-0.0481265	0.091897	0.074547
SS76094	-0.019	0.030375	1.43767	2.59222	1.47017	60.8316	106.883	97.1054	-0.053258	0.114402	0.0230005	0.0651135	0.108429
SS80896	0.14375	0.03425	1.87652	2.44652	2.00538	66.2077	99.0533	82.1289	0.00989	0.116439	-0.0109735	0.0402195	0.0751685
SS67755	0.112143	0.0511429	1.31214	2.22229	1.44797	60.5512	92.7789	83.6264	-0.035592	0.0526535	0.057647	0.0491275	0.061237
MB027B	0.13125	0.05575	1.0875	1.75775	1.09437	50.3258	90.3583	69.6229	-0.05499	0.123613	0.0893335	0.138449	0.0617685
SS80958	0.14325	0.0765	1.07135	1.50622	1.7235	45.1383	164.576	85.9846	-0.118985	0.0197845	0.11381	0.119598	0.0492715
MB011B	0.0278125	0.0828125	1.08805	1.72208	1.40707	58.7252	110.494	89.0813	-0.101143	0.0087585	0.359749	-0.0564545	0.034002
SS76042	0.125833	0.0851667	1.31961	2.37903	1.79757	62.3012	113.194	102.848	-0.012126	0.0936675	0.04047	0.0763665	0.0948175
SS81557	0.08225	0.09725	1.85743	2.55593	1.97467	77.1624	108.449	81.2164	-0.044038	0.126021	-0.0112665	0.0375145	0.0811285
SS77424	0.1606	0.1217	2.01567	3.78694	1.96651	76.4752	138.895	96.4895	-0.038779	0.170689	-0.0033605	0.158643	0.100076
SS76057	0.100167	0.151	1.49765	2.84759	1.37124	75.9558	103.705	95.6428	-0.007945	0.0961065	-0.0158255	0.0459495	0.100535
SS75200	0.134688	0.161187	1.61787	2.11837	1.79752	81.6976	131.519	105.841	-0.062868	0.070206	0.009036	0.033235	0.112517
SS95109	0.118	0.1615	1.04951	2.20919	1.49104	50.6915	172.901	80.4619	-0.08119	0.069341	0.0164265	0.101814	0.051194
SS77442	0.170286	0.184429	1.20698	2.02906	1.56163	56.5704	98.8216	87.0381	-0.159329	0.0157095	0.0003195	0.069313	0.077265
SS77383	0.2151	0.2708	1.40688	1.5962	1.06456	76.468	98.7497	86.483	-0.065839	0.0782315	0.028702	0.0369955	0.0677935
