# Supplementary material for: New genetic tools for mushroom body output neurons in Drosophila
Source: eLife. 2024 Jan 25;12:RP90523. doi: 10.7554/eLife.90523 (PMC10945696; doi:10.7554/eLife.90523)
Supplement: Figure 3—source data 1. [file elife-90523-fig3-data1.xlsx]

## Sheet: Figure 3A
Time (s)	Empty-split	Empty-split	Empty-split	Empty-split	Empty-split	Empty-split	Empty-split	Empty-split	Empty-split	Empty-split	Empty-split	Empty-split	Empty-split	Empty-split	Empty-split	Empty-split	Empty-split	Empty-split	Empty-split	Empty-split	Empty-split	Empty-split	Empty-split	Empty-split	Empty-split	Empty-split	Empty-split	Empty-split	Empty-split	Empty-split	Empty-split	Empty-split	Empty-split	Empty-split	Empty-split	Empty-split	Empty-split	Empty-split	Empty-split	Empty-split	Empty-split	Empty-split	Empty-split	Empty-split	Empty-split	Empty-split	Empty-split	Empty-split	Empty-split
-4.9667	-0.0062	-0.0442	0.1493	-0.3596	-0.4374	-0.4487	-0.2264	-0.3282	-0.2462	0.0708	-0.2425	-0.4239	-0.4139	-0.2059	-0.2111	-0.3274	-0.1581	-0.2579	-0.5013	-0.2559	-0.3945	-0.4565	-0.4029	-0.4388	-0.2618	-0.3301	-0.1684	-0.3519	-0.4192	-0.3438	-0.0912	0.029	-0.4405	0.021	-0.3749	-0.0836	-0.3523	-0.3576	-0.4093	-0.4162	-0.3055	-0.3398	-0.1742	-0.3943	-0.2487	-0.2267	-0.3537	-0.0695	-0.2909
-4.9333	-0.0127	-0.0455	0.15	-0.3647	-0.4484	-0.4413	-0.2273	-0.3329	-0.2387	0.0752	-0.2519	-0.414	-0.4097	-0.2157	-0.2127	-0.3301	-0.1646	-0.254	-0.5024	-0.2583	-0.3884	-0.4563	-0.4058	-0.4418	-0.2572	-0.3329	-0.1653	-0.3465	-0.4228	-0.3371	-0.0899	0.0184	-0.4371	0.0189	-0.3735	-0.0832	-0.3537	-0.3611	-0.4132	-0.4196	-0.3018	-0.3413	-0.1827	-0.3907	-0.2492	-0.2283	-0.3673	-0.0718	-0.2882
-4.9	-0.0173	-0.0524	0.1484	-0.3657	-0.4558	-0.4333	-0.2282	-0.3386	-0.2372	0.0784	-0.2702	-0.4103	-0.4041	-0.2218	-0.222	-0.3307	-0.1701	-0.2532	-0.5067	-0.2591	-0.3901	-0.4585	-0.4058	-0.4426	-0.2553	-0.3249	-0.1596	-0.3387	-0.4162	-0.3383	-0.093	0.0077	-0.4115	0.0211	-0.3667	-0.0823	-0.3532	-0.3621	-0.4249	-0.4206	-0.3003	-0.338	-0.1923	-0.3882	-0.2471	-0.2269	-0.3845	-0.0761	-0.2832
-4.8667	-0.0226	-0.0438	0.1403	-0.3582	-0.4604	-0.4284	-0.23	-0.3427	-0.2396	0.0798	-0.283	-0.41	-0.3995	-0.2268	-0.2311	-0.3302	-0.1773	-0.2643	-0.5001	-0.2732	-0.3859	-0.4731	-0.4125	-0.4424	-0.2528	-0.3192	-0.1584	-0.329	-0.3999	-0.3438	-0.0964	0.0034	-0.4141	0.0256	-0.3635	-0.0766	-0.3537	-0.3671	-0.4276	-0.4278	-0.3016	-0.3449	-0.1974	-0.3829	-0.2428	-0.2229	-0.3999	-0.0769	-0.288
-4.8333	-0.0291	-0.037	0.1246	-0.3635	-0.4623	-0.4243	-0.2339	-0.3417	-0.2377	0.0798	-0.2922	-0.4138	-0.3996	-0.2252	-0.232	-0.3368	-0.1863	-0.2707	-0.4989	-0.2864	-0.3882	-0.4742	-0.4202	-0.4376	-0.2316	-0.3145	-0.1628	-0.3146	-0.3779	-0.3439	-0.0949	0.0014	-0.4142	0.0224	-0.3614	-0.0732	-0.3537	-0.3722	-0.4295	-0.4298	-0.3077	-0.3492	-0.2035	-0.3773	-0.2418	-0.2165	-0.3932	-0.0783	-0.2877
-4.8	-0.0306	-0.0461	0.1023	-0.3623	-0.4613	-0.4167	-0.2354	-0.3391	-0.2348	0.0728	-0.31	-0.4112	-0.4086	-0.2338	-0.2343	-0.328	-0.1966	-0.2706	-0.5046	-0.2963	-0.3923	-0.4844	-0.4255	-0.4381	-0.2368	-0.3104	-0.1646	-0.3056	-0.3833	-0.3557	-0.1018	-0.0065	-0.4123	0.0264	-0.3594	-0.0817	-0.3457	-0.3728	-0.4317	-0.4296	-0.3126	-0.3516	-0.2151	-0.3754	-0.2453	-0.2089	-0.3994	-0.0804	-0.2893
-4.7667	-0.0263	-0.043	0.0876	-0.3581	-0.4551	-0.4137	-0.2403	-0.3382	-0.2335	0.0655	-0.3258	-0.4122	-0.4214	-0.2384	-0.2364	-0.3254	-0.1978	-0.2717	-0.5181	-0.2956	-0.3901	-0.4939	-0.4347	-0.4356	-0.2236	-0.3125	-0.1694	-0.2981	-0.3832	-0.3691	-0.1146	-0.0088	-0.4129	0.0257	-0.3557	-0.0869	-0.3405	-0.3743	-0.4337	-0.4334	-0.3171	-0.3482	-0.2228	-0.3773	-0.2451	-0.2006	-0.4032	-0.0807	-0.2792
-4.7333	-0.0242	-0.0547	0.0771	-0.3518	-0.4493	-0.4066	-0.2416	-0.3374	-0.2316	0.0602	-0.3381	-0.4142	-0.4304	-0.2508	-0.2515	-0.3177	-0.197	-0.2697	-0.5207	-0.2959	-0.3868	-0.5015	-0.4374	-0.4323	-0.2191	-0.2996	-0.1732	-0.2943	-0.3604	-0.3761	-0.1264	-0.0222	-0.4104	0.0261	-0.3528	-0.0868	-0.3373	-0.374	-0.4309	-0.4392	-0.3241	-0.3382	-0.2392	-0.3818	-0.2438	-0.196	-0.4019	-0.0865	-0.2867
-4.7	-0.0217	-0.0521	0.0739	-0.3461	-0.4211	-0.411	-0.2413	-0.3377	-0.2313	0.0457	-0.3448	-0.4182	-0.4332	-0.262	-0.2553	-0.3031	-0.1902	-0.2703	-0.5316	-0.2942	-0.3912	-0.5088	-0.4343	-0.4297	-0.225	-0.2948	-0.1715	-0.2985	-0.3323	-0.4029	-0.1201	-0.0309	-0.4108	0.0275	-0.3499	-0.085	-0.3334	-0.3727	-0.4311	-0.4468	-0.3325	-0.3255	-0.2506	-0.3879	-0.2431	-0.194	-0.3978	-0.0919	-0.2859
-4.6667	-0.0242	-0.0566	0.0748	-0.3387	-0.4056	-0.4261	-0.245	-0.333	-0.2268	0.0277	-0.3447	-0.4239	-0.437	-0.2656	-0.254	-0.2927	-0.1885	-0.2676	-0.5453	-0.2914	-0.4005	-0.5161	-0.4182	-0.4307	-0.2213	-0.2999	-0.172	-0.298	-0.3325	-0.3892	-0.1248	-0.036	-0.413	0.0304	-0.3486	-0.0825	-0.3279	-0.3732	-0.437	-0.4455	-0.3398	-0.3169	-0.2647	-0.3894	-0.2436	-0.1937	-0.3985	-0.0962	-0.2837
-4.6333	-0.0264	-0.0539	0.0732	-0.3296	-0.3978	-0.4338	-0.241	-0.3319	-0.2254	0.0213	-0.3507	-0.4351	-0.4401	-0.2689	-0.2645	-0.2845	-0.1918	-0.261	-0.5535	-0.2939	-0.4033	-0.5234	-0.4066	-0.4288	-0.2245	-0.3176	-0.1717	-0.2976	-0.3293	-0.386	-0.1316	-0.047	-0.4135	0.0281	-0.3439	-0.0817	-0.325	-0.3726	-0.4363	-0.4379	-0.3454	-0.3102	-0.2783	-0.3953	-0.2451	-0.192	-0.3957	-0.1051	-0.2786
-4.6	-0.0265	-0.0533	0.0688	-0.3264	-0.3978	-0.4502	-0.229	-0.3325	-0.2231	0.0182	-0.3595	-0.4515	-0.4406	-0.2736	-0.2655	-0.283	-0.202	-0.2539	-0.5617	-0.3038	-0.408	-0.5321	-0.4026	-0.4283	-0.2277	-0.3188	-0.1659	-0.2925	-0.327	-0.3947	-0.1218	-0.0511	-0.4135	0.0246	-0.3384	-0.0812	-0.3249	-0.3712	-0.4409	-0.4331	-0.3512	-0.3061	-0.2842	-0.3987	-0.25	-0.1891	-0.3934	-0.1124	-0.2819
-4.5667	-0.0257	-0.0457	0.0618	-0.3237	-0.4038	-0.4572	-0.2225	-0.3295	-0.2263	0.0135	-0.3673	-0.4629	-0.4407	-0.2783	-0.2627	-0.2858	-0.2075	-0.2491	-0.5658	-0.3125	-0.4169	-0.542	-0.3982	-0.4282	-0.2325	-0.3246	-0.165	-0.2867	-0.3331	-0.4014	-0.1254	-0.061	-0.414	0.0067	-0.3348	-0.081	-0.3261	-0.3702	-0.4425	-0.4338	-0.3509	-0.2988	-0.2902	-0.3959	-0.2497	-0.1842	-0.3921	-0.1163	-0.2792
-4.5333	-0.0229	-0.0488	0.0586	-0.3191	-0.4151	-0.4689	-0.215	-0.3298	-0.2288	0.0143	-0.3726	-0.4711	-0.4444	-0.2854	-0.2752	-0.2974	-0.2125	-0.2447	-0.5728	-0.3191	-0.4181	-0.5458	-0.3742	-0.4269	-0.2353	-0.3341	-0.163	-0.2876	-0.3439	-0.4121	-0.1288	-0.0582	-0.414	0.0051	-0.3325	-0.0813	-0.3241	-0.3733	-0.4475	-0.4307	-0.3499	-0.301	-0.2874	-0.3906	-0.2532	-0.178	-0.394	-0.1167	-0.2857
-4.5	-0.0257	-0.0482	0.0552	-0.3167	-0.4306	-0.4791	-0.2035	-0.3334	-0.2363	0.017	-0.374	-0.4627	-0.4421	-0.2946	-0.2876	-0.305	-0.2252	-0.2453	-0.5783	-0.3174	-0.4483	-0.55	-0.3703	-0.4294	-0.2365	-0.3435	-0.1543	-0.2887	-0.345	-0.4184	-0.1227	-0.0646	-0.4167	0.0071	-0.3339	-0.0836	-0.3235	-0.3785	-0.4475	-0.4269	-0.3494	-0.2989	-0.2892	-0.3872	-0.2589	-0.1778	-0.396	-0.1218	-0.2934
-4.4667	-0.0243	-0.0528	0.0633	-0.3124	-0.4425	-0.4859	-0.2024	-0.3304	-0.2441	0.0158	-0.3735	-0.4666	-0.4375	-0.2969	-0.2927	-0.3145	-0.2422	-0.2523	-0.5907	-0.3147	-0.4618	-0.5508	-0.3396	-0.4311	-0.2347	-0.3544	-0.1536	-0.291	-0.3335	-0.4297	-0.1216	-0.0531	-0.4203	0.0081	-0.3314	-0.0858	-0.3222	-0.381	-0.4487	-0.4218	-0.3474	-0.2948	-0.2937	-0.3838	-0.2626	-0.1733	-0.3989	-0.1243	-0.2875
-4.4333	-0.018	-0.0529	0.0679	-0.3005	-0.4482	-0.4904	-0.2038	-0.3303	-0.2513	0.0229	-0.3633	-0.4701	-0.4337	-0.2957	-0.297	-0.3162	-0.2574	-0.2556	-0.6025	-0.3118	-0.4681	-0.5544	-0.3289	-0.4265	-0.2239	-0.3632	-0.1508	-0.2938	-0.34	-0.4359	-0.1185	-0.0645	-0.4262	-0.0044	-0.3335	-0.0921	-0.3223	-0.3847	-0.4432	-0.4163	-0.3452	-0.2884	-0.2958	-0.3848	-0.2654	-0.1709	-0.4001	-0.1253	-0.2738
-4.4	-0.0151	-0.0561	0.0663	-0.2847	-0.4499	-0.494	-0.2044	-0.3313	-0.2586	0.03	-0.3575	-0.4749	-0.4286	-0.2977	-0.304	-0.316	-0.2738	-0.2548	-0.6007	-0.3171	-0.4662	-0.5625	-0.3327	-0.4214	-0.2402	-0.3686	-0.1442	-0.2926	-0.3368	-0.4429	-0.1179	-0.0737	-0.4303	-0.0013	-0.3329	-0.0977	-0.3224	-0.3851	-0.4362	-0.4132	-0.3447	-0.2878	-0.2968	-0.3819	-0.2632	-0.1768	-0.401	-0.1226	-0.262
-4.3667	-0.0154	-0.0628	0.0656	-0.2723	-0.4525	-0.5001	-0.2039	-0.3332	-0.2627	0.0332	-0.3569	-0.4732	-0.4249	-0.2996	-0.313	-0.3131	-0.2856	-0.2515	-0.6083	-0.31	-0.4577	-0.5663	-0.3302	-0.4218	-0.2633	-0.3661	-0.1512	-0.2989	-0.331	-0.4449	-0.1186	-0.0743	-0.4327	-0.001	-0.3292	-0.1005	-0.323	-0.3927	-0.4296	-0.4112	-0.3358	-0.287	-0.294	-0.3787	-0.265	-0.182	-0.4002	-0.1168	-0.2578
-4.3333	-0.0236	-0.0654	0.0584	-0.2531	-0.4516	-0.5025	-0.2056	-0.3401	-0.2648	0.0325	-0.3636	-0.4676	-0.4199	-0.2999	-0.3162	-0.3129	-0.2951	-0.2411	-0.6158	-0.3037	-0.4479	-0.5657	-0.332	-0.4209	-0.2515	-0.367	-0.1556	-0.3046	-0.3244	-0.4505	-0.1185	-0.074	-0.4407	0.0079	-0.3253	-0.1003	-0.3232	-0.3955	-0.4263	-0.4062	-0.3454	-0.2927	-0.2908	-0.3774	-0.265	-0.1905	-0.3996	-0.1157	-0.2603
-4.3	-0.0346	-0.074	0.0545	-0.2535	-0.4512	-0.4986	-0.2069	-0.3389	-0.2672	0.0338	-0.3622	-0.4541	-0.4194	-0.2912	-0.3244	-0.3118	-0.3126	-0.2414	-0.6241	-0.3008	-0.4337	-0.5555	-0.335	-0.4251	-0.2643	-0.3672	-0.1584	-0.3057	-0.3204	-0.4572	-0.1172	-0.074	-0.4415	0.0203	-0.3282	-0.1006	-0.3193	-0.3968	-0.4242	-0.3983	-0.3492	-0.2914	-0.2867	-0.3748	-0.2656	-0.1922	-0.3994	-0.1108	-0.2619
-4.2667	-0.0438	-0.0711	0.0535	-0.2492	-0.4492	-0.4998	-0.2046	-0.342	-0.2646	0.0354	-0.3596	-0.4421	-0.4125	-0.2885	-0.3259	-0.3109	-0.3245	-0.2457	-0.6243	-0.2897	-0.4329	-0.5488	-0.3325	-0.4228	-0.2683	-0.363	-0.161	-0.309	-0.3179	-0.451	-0.1155	-0.0755	-0.4356	0.0231	-0.3305	-0.0963	-0.3165	-0.3979	-0.4261	-0.3947	-0.3528	-0.2851	-0.2865	-0.3685	-0.2667	-0.189	-0.3995	-0.1086	-0.2684
-4.2333	-0.0446	-0.065	0.0477	-0.2573	-0.4517	-0.5029	-0.2042	-0.3426	-0.2681	0.0365	-0.3563	-0.4319	-0.4038	-0.2882	-0.3218	-0.3131	-0.3318	-0.2539	-0.6257	-0.2771	-0.4336	-0.5365	-0.3427	-0.4227	-0.2609	-0.3585	-0.1613	-0.3125	-0.3115	-0.4496	-0.1087	-0.0798	-0.4258	0.0147	-0.3359	-0.0979	-0.3098	-0.4005	-0.4201	-0.3962	-0.3497	-0.2863	-0.2838	-0.3579	-0.2715	-0.1895	-0.3981	-0.1058	-0.2803
-4.2	-0.0483	-0.0571	0.0499	-0.2597	-0.4531	-0.5091	-0.2033	-0.3414	-0.2686	0.0407	-0.3502	-0.4297	-0.3886	-0.2844	-0.3189	-0.3218	-0.3477	-0.2567	-0.6275	-0.2576	-0.4395	-0.5279	-0.3432	-0.4214	-0.2833	-0.357	-0.1656	-0.3173	-0.3067	-0.451	-0.1021	-0.0724	-0.4215	0.0068	-0.3419	-0.0995	-0.3024	-0.3995	-0.4227	-0.3954	-0.3526	-0.2798	-0.2819	-0.345	-0.2719	-0.1984	-0.3961	-0.1021	-0.2849
-4.1667	-0.0499	-0.0529	0.0645	-0.268	-0.4553	-0.5014	-0.2069	-0.3416	-0.2655	0.0408	-0.3478	-0.4303	-0.3821	-0.284	-0.3166	-0.3284	-0.353	-0.2635	-0.6319	-0.2419	-0.4464	-0.5206	-0.3512	-0.4205	-0.3068	-0.3583	-0.1684	-0.303	-0.3065	-0.4523	-0.0971	-0.0619	-0.4138	0.0104	-0.3484	-0.1005	-0.2981	-0.402	-0.4261	-0.3956	-0.3559	-0.2726	-0.279	-0.3381	-0.2766	-0.2041	-0.3918	-0.0952	-0.2933
-4.1333	-0.0547	-0.0485	0.0651	-0.2705	-0.4552	-0.5002	-0.2009	-0.3378	-0.2669	0.034	-0.3463	-0.424	-0.3741	-0.2875	-0.3117	-0.3379	-0.3557	-0.2696	-0.621	-0.2301	-0.4367	-0.5195	-0.3664	-0.42	-0.306	-0.3618	-0.1834	-0.2899	-0.3077	-0.4562	-0.0885	-0.0575	-0.4041	0.0035	-0.3559	-0.0964	-0.2925	-0.3988	-0.4262	-0.4063	-0.355	-0.2697	-0.2817	-0.3345	-0.2887	-0.2133	-0.3892	-0.0878	-0.3004
-4.1	-0.06	-0.0513	0.0598	-0.28	-0.4584	-0.508	-0.2016	-0.3352	-0.2722	0.0308	-0.3422	-0.4222	-0.3679	-0.2912	-0.3076	-0.3421	-0.3558	-0.2777	-0.6264	-0.2164	-0.4295	-0.5188	-0.3735	-0.4216	-0.295	-0.3643	-0.1909	-0.2775	-0.3124	-0.4559	-0.086	-0.0524	-0.4024	0.004	-0.3619	-0.0947	-0.2834	-0.4027	-0.4293	-0.4226	-0.3561	-0.2614	-0.2873	-0.3349	-0.2955	-0.2186	-0.3857	-0.0766	-0.3061
-4.0667	-0.0547	-0.0495	0.0569	-0.2894	-0.4599	-0.5099	-0.2029	-0.3338	-0.2771	0.0261	-0.3443	-0.4238	-0.3612	-0.2967	-0.3011	-0.3465	-0.3478	-0.2788	-0.6266	-0.2073	-0.4235	-0.5276	-0.3945	-0.4216	-0.2864	-0.3673	-0.209	-0.2776	-0.3118	-0.4462	-0.0868	-0.0373	-0.4017	0.0163	-0.3674	-0.0937	-0.2771	-0.4063	-0.4383	-0.4206	-0.3559	-0.2587	-0.2948	-0.3354	-0.3025	-0.2224	-0.384	-0.0654	-0.3135
-4.0333	-0.0528	-0.0522	0.048	-0.2963	-0.465	-0.5084	-0.2045	-0.3389	-0.2838	0.0252	-0.3436	-0.4287	-0.3515	-0.2903	-0.2915	-0.3478	-0.3371	-0.277	-0.6251	-0.1962	-0.4142	-0.5336	-0.4121	-0.4183	-0.2817	-0.3682	-0.2201	-0.2864	-0.3128	-0.4398	-0.0866	-0.0475	-0.3965	0.0199	-0.3698	-0.0945	-0.2728	-0.4083	-0.4426	-0.423	-0.3568	-0.2616	-0.3055	-0.3426	-0.3077	-0.2321	-0.3839	-0.0546	-0.3121
-4	-0.0522	-0.0646	0.0419	-0.3093	-0.4719	-0.5067	-0.2017	-0.3424	-0.2916	0.0256	-0.3397	-0.4334	-0.3445	-0.2893	-0.2951	-0.3457	-0.3246	-0.2738	-0.6407	-0.1836	-0.4076	-0.5364	-0.4198	-0.4173	-0.2737	-0.3658	-0.2337	-0.282	-0.3095	-0.4381	-0.0885	-0.0476	-0.3919	0.0226	-0.3713	-0.0984	-0.2691	-0.4091	-0.4435	-0.4312	-0.3586	-0.2648	-0.3173	-0.3526	-0.3191	-0.2475	-0.3844	-0.0562	-0.3085
-3.9667	-0.0511	-0.0666	0.0414	-0.3172	-0.4767	-0.5042	-0.2033	-0.347	-0.2946	0.0211	-0.3415	-0.4389	-0.3362	-0.285	-0.2982	-0.3417	-0.317	-0.275	-0.6375	-0.1844	-0.4168	-0.5439	-0.4276	-0.4223	-0.2677	-0.3638	-0.2484	-0.283	-0.3033	-0.4338	-0.0918	-0.052	-0.3945	0.0221	-0.3745	-0.1027	-0.2632	-0.415	-0.4419	-0.4352	-0.3574	-0.272	-0.3243	-0.3581	-0.3303	-0.2552	-0.3823	-0.0626	-0.3181
-3.9333	-0.0483	-0.0678	0.0415	-0.3287	-0.4829	-0.5037	-0.2044	-0.3477	-0.2915	0.0137	-0.3479	-0.4337	-0.3321	-0.2821	-0.3005	-0.3453	-0.3177	-0.2789	-0.6317	-0.1818	-0.4172	-0.546	-0.4421	-0.4244	-0.2674	-0.3606	-0.2517	-0.2748	-0.304	-0.4315	-0.0951	-0.0392	-0.3934	0.0176	-0.3801	-0.0961	-0.2564	-0.4182	-0.4449	-0.4373	-0.3564	-0.2792	-0.3256	-0.3589	-0.3364	-0.2588	-0.3802	-0.0715	-0.3289
-3.9	-0.0427	-0.0834	0.0418	-0.3446	-0.4916	-0.501	-0.2093	-0.3492	-0.2897	0.0081	-0.3511	-0.4245	-0.3251	-0.2857	-0.3022	-0.3542	-0.3208	-0.2831	-0.6316	-0.1628	-0.4163	-0.548	-0.4243	-0.4252	-0.2613	-0.3565	-0.2587	-0.276	-0.3169	-0.4245	-0.094	-0.0411	-0.3923	0.0027	-0.3813	-0.1019	-0.2528	-0.4201	-0.4438	-0.4337	-0.3526	-0.2795	-0.3271	-0.3588	-0.3395	-0.2639	-0.378	-0.0773	-0.3357
-3.8667	-0.0324	-0.0939	0.0362	-0.3486	-0.4937	-0.4964	-0.2118	-0.3544	-0.2885	0.0011	-0.3487	-0.4219	-0.3192	-0.292	-0.3065	-0.3649	-0.3213	-0.291	-0.6256	-0.1649	-0.4164	-0.5515	-0.4099	-0.4201	-0.2486	-0.3515	-0.2603	-0.2862	-0.3305	-0.4292	-0.0982	-0.0644	-0.3886	-0.0063	-0.3849	-0.102	-0.2496	-0.4227	-0.4499	-0.4303	-0.3547	-0.2882	-0.3241	-0.3528	-0.339	-0.2737	-0.3752	-0.0893	-0.3399
-3.8333	-0.0284	-0.096	0.0337	-0.3623	-0.4944	-0.4913	-0.213	-0.3596	-0.288	-0.0056	-0.3471	-0.4154	-0.3196	-0.3015	-0.3166	-0.3679	-0.316	-0.2977	-0.6346	-0.1695	-0.4182	-0.5561	-0.3945	-0.4224	-0.2384	-0.3471	-0.2613	-0.2985	-0.3277	-0.4241	-0.102	-0.0625	-0.3938	-0.0182	-0.3891	-0.1028	-0.2475	-0.4221	-0.4523	-0.4295	-0.3587	-0.2849	-0.3237	-0.346	-0.3371	-0.2823	-0.3754	-0.094	-0.3495
-3.8	-0.0225	-0.1338	0.0376	-0.3907	-0.4989	-0.4916	-0.2147	-0.3581	-0.287	-0.0109	-0.349	-0.4167	-0.3132	-0.3115	-0.3169	-0.3687	-0.313	-0.3026	-0.6375	-0.1713	-0.4145	-0.5594	-0.3871	-0.4242	-0.2297	-0.3367	-0.2681	-0.3122	-0.329	-0.423	-0.1057	-0.055	-0.3866	-0.0199	-0.3919	-0.107	-0.2462	-0.4225	-0.4554	-0.4215	-0.3589	-0.2813	-0.3174	-0.3471	-0.3396	-0.2903	-0.3771	-0.0912	-0.3564
-3.7667	-0.0159	-0.1442	0.0499	-0.4057	-0.5022	-0.4894	-0.2112	-0.3597	-0.2875	-0.0193	-0.3505	-0.4204	-0.3079	-0.3143	-0.3124	-0.3682	-0.3095	-0.3023	-0.6263	-0.1657	-0.412	-0.5599	-0.3788	-0.4321	-0.2212	-0.329	-0.266	-0.3259	-0.3283	-0.4159	-0.1078	-0.0441	-0.3795	-0.0248	-0.3928	-0.1102	-0.2465	-0.4215	-0.4643	-0.4202	-0.3619	-0.2778	-0.3093	-0.3473	-0.3312	-0.302	-0.3801	-0.0898	-0.3611
-3.7333	-0.011	-0.1605	0.0579	-0.4178	-0.5076	-0.4851	-0.2062	-0.3682	-0.2961	-0.0286	-0.3638	-0.4285	-0.3073	-0.3205	-0.3138	-0.3711	-0.3072	-0.3022	-0.6133	-0.1474	-0.4144	-0.5602	-0.3781	-0.4334	-0.2149	-0.325	-0.2644	-0.3312	-0.334	-0.419	-0.1107	-0.0397	-0.3711	-0.026	-0.3951	-0.1101	-0.2468	-0.4158	-0.4597	-0.4115	-0.3678	-0.2726	-0.2952	-0.3441	-0.3284	-0.3066	-0.3808	-0.0874	-0.3588
-3.7	-0.0024	-0.1671	0.0646	-0.4116	-0.5133	-0.4871	-0.2013	-0.3761	-0.304	-0.0255	-0.3712	-0.4514	-0.3102	-0.3063	-0.3237	-0.3768	-0.3002	-0.3016	-0.589	-0.144	-0.4227	-0.5623	-0.375	-0.4321	-0.204	-0.3268	-0.2613	-0.329	-0.3336	-0.4149	-0.1117	-0.0412	-0.3717	-0.03	-0.3965	-0.1105	-0.2441	-0.4137	-0.445	-0.4025	-0.3685	-0.2677	-0.2765	-0.3405	-0.3267	-0.3071	-0.3809	-0.0892	-0.3596
-3.6667	-0.0025	-0.1683	0.0635	-0.4076	-0.5119	-0.494	-0.2024	-0.3784	-0.3068	-0.0242	-0.3686	-0.4566	-0.3187	-0.287	-0.3312	-0.3773	-0.2949	-0.2996	-0.595	-0.1416	-0.4265	-0.5543	-0.3715	-0.4313	-0.196	-0.3272	-0.2591	-0.332	-0.3369	-0.4205	-0.1107	-0.0407	-0.3751	-0.0291	-0.3989	-0.1206	-0.2403	-0.4099	-0.4355	-0.4032	-0.3691	-0.2682	-0.2592	-0.3412	-0.3213	-0.3072	-0.3831	-0.0956	-0.354
-3.6333	-0.0039	-0.1705	0.0613	-0.4065	-0.5124	-0.5009	-0.1991	-0.3758	-0.3059	-0.0256	-0.3703	-0.4622	-0.3257	-0.2811	-0.3341	-0.3786	-0.281	-0.2999	-0.5831	-0.1405	-0.4343	-0.5439	-0.3521	-0.4304	-0.1927	-0.3299	-0.2594	-0.3317	-0.3527	-0.4256	-0.1103	-0.038	-0.3931	-0.0323	-0.3991	-0.1302	-0.2358	-0.4121	-0.4308	-0.4053	-0.3687	-0.2708	-0.2456	-0.3432	-0.3182	-0.3134	-0.3845	-0.1005	-0.3392
-3.6	-0.0034	-0.1667	0.0594	-0.4022	-0.5112	-0.5062	-0.2016	-0.37	-0.3039	-0.0275	-0.3614	-0.466	-0.3238	-0.287	-0.3325	-0.3735	-0.2814	-0.2963	-0.5738	-0.141	-0.4405	-0.5139	-0.3349	-0.4311	-0.1913	-0.3333	-0.2669	-0.338	-0.3572	-0.4277	-0.1061	-0.0354	-0.3963	-0.033	-0.3967	-0.1231	-0.2293	-0.4164	-0.4275	-0.4062	-0.3672	-0.2694	-0.2355	-0.3388	-0.3149	-0.3194	-0.3861	-0.1026	-0.326
-3.5667	-0.0013	-0.1697	0.0672	-0.4012	-0.5053	-0.5044	-0.2015	-0.3659	-0.3026	-0.0321	-0.3515	-0.4697	-0.3263	-0.2868	-0.3284	-0.3672	-0.2863	-0.28	-0.5634	-0.1367	-0.4435	-0.5047	-0.3128	-0.4277	-0.1885	-0.3368	-0.2632	-0.3443	-0.3451	-0.4316	-0.1055	-0.0345	-0.4006	-0.0326	-0.3968	-0.1212	-0.2246	-0.4212	-0.4236	-0.4115	-0.3678	-0.265	-0.2245	-0.3405	-0.3097	-0.322	-0.3877	-0.111	-0.3143
-3.5333	0.0052	-0.1733	0.0822	-0.3945	-0.496	-0.5092	-0.1993	-0.3666	-0.3052	-0.0364	-0.3386	-0.4726	-0.337	-0.283	-0.3231	-0.3646	-0.2986	-0.2827	-0.5609	-0.1228	-0.45	-0.5313	-0.2875	-0.422	-0.1877	-0.3367	-0.2518	-0.3465	-0.3405	-0.4283	-0.105	-0.037	-0.4167	-0.0144	-0.3934	-0.1306	-0.2172	-0.427	-0.4269	-0.412	-0.3676	-0.2636	-0.2147	-0.3404	-0.3068	-0.3149	-0.3899	-0.1169	-0.3033
-3.5	0.009	-0.1734	0.0812	-0.3818	-0.4845	-0.5167	-0.2065	-0.3662	-0.3066	-0.0455	-0.3315	-0.4788	-0.3472	-0.2823	-0.322	-0.3603	-0.2997	-0.2822	-0.5512	-0.1244	-0.452	-0.5456	-0.2718	-0.4161	-0.1881	-0.34	-0.2413	-0.3486	-0.3342	-0.4287	-0.1053	-0.0349	-0.4138	-0.011	-0.3931	-0.1327	-0.2121	-0.4332	-0.4225	-0.4101	-0.3683	-0.264	-0.2055	-0.345	-0.2996	-0.3026	-0.3898	-0.123	-0.2955
-3.4667	0.0127	-0.1744	0.0755	-0.3686	-0.472	-0.5168	-0.2086	-0.3654	-0.3093	-0.0508	-0.3225	-0.4756	-0.3595	-0.2794	-0.3164	-0.3573	-0.2902	-0.2707	-0.5401	-0.1221	-0.4603	-0.5476	-0.2659	-0.4118	-0.1929	-0.3357	-0.2383	-0.3485	-0.3262	-0.4322	-0.1074	-0.0307	-0.4143	-0.0109	-0.3924	-0.1385	-0.2061	-0.4338	-0.4174	-0.4042	-0.368	-0.2672	-0.1959	-0.3406	-0.2958	-0.3081	-0.3928	-0.1284	-0.2917
-3.4333	0.009	-0.17	0.0861	-0.3607	-0.4676	-0.5142	-0.2073	-0.3705	-0.308	-0.0534	-0.3197	-0.4741	-0.3657	-0.2744	-0.3094	-0.3577	-0.2851	-0.2613	-0.5525	-0.1094	-0.4586	-0.5425	-0.2697	-0.4079	-0.1935	-0.3385	-0.2448	-0.3502	-0.3209	-0.4286	-0.1074	-0.0312	-0.4223	-0.0134	-0.3922	-0.1362	-0.2049	-0.4289	-0.4156	-0.3922	-0.3671	-0.2665	-0.19	-0.3347	-0.2922	-0.3127	-0.3951	-0.1305	-0.2933
-3.4	0.0017	-0.1666	0.0766	-0.3573	-0.4688	-0.5089	-0.2082	-0.3697	-0.3086	-0.0617	-0.3168	-0.4803	-0.373	-0.2673	-0.2969	-0.3499	-0.2869	-0.2581	-0.5659	-0.0973	-0.4603	-0.5316	-0.2783	-0.4171	-0.1976	-0.3443	-0.2297	-0.3561	-0.3133	-0.4312	-0.1133	-0.0315	-0.4259	-0.0201	-0.3898	-0.1399	-0.2033	-0.4259	-0.4127	-0.3849	-0.3672	-0.2679	-0.1858	-0.3258	-0.2926	-0.3171	-0.3937	-0.1317	-0.2975
-3.3667	-0.005	-0.1565	0.0622	-0.3545	-0.4665	-0.5012	-0.2117	-0.3687	-0.3059	-0.0669	-0.3166	-0.4913	-0.3753	-0.2586	-0.2877	-0.3412	-0.2892	-0.265	-0.5713	-0.0898	-0.4603	-0.5243	-0.2802	-0.4228	-0.1993	-0.3572	-0.2291	-0.3535	-0.303	-0.425	-0.1163	-0.0442	-0.429	-0.0197	-0.3917	-0.1384	-0.2016	-0.4244	-0.4108	-0.3767	-0.3659	-0.2686	-0.1799	-0.322	-0.2912	-0.3228	-0.3908	-0.1375	-0.3052
-3.3333	-0.0082	-0.1486	0.0436	-0.348	-0.4718	-0.5023	-0.2118	-0.375	-0.3021	-0.0721	-0.3102	-0.5035	-0.3689	-0.2507	-0.283	-0.3348	-0.3017	-0.2704	-0.5721	-0.089	-0.4576	-0.5259	-0.2789	-0.422	-0.2015	-0.3654	-0.2226	-0.3516	-0.3017	-0.4302	-0.1166	-0.049	-0.4305	-0.0203	-0.3915	-0.1343	-0.2075	-0.4259	-0.4074	-0.3724	-0.3678	-0.2565	-0.1737	-0.312	-0.291	-0.3186	-0.3901	-0.1428	-0.314
-3.3	-0.0132	-0.1438	0.0471	-0.3473	-0.4763	-0.4972	-0.2065	-0.3746	-0.2925	-0.0731	-0.3102	-0.5158	-0.3718	-0.2552	-0.2876	-0.3307	-0.3087	-0.2736	-0.5694	-0.0727	-0.4628	-0.5371	-0.2658	-0.4172	-0.2066	-0.371	-0.2226	-0.357	-0.3081	-0.4288	-0.1234	-0.0533	-0.4335	-0.0176	-0.3887	-0.143	-0.2109	-0.4241	-0.4091	-0.368	-0.3731	-0.2566	-0.1648	-0.3089	-0.2903	-0.3181	-0.3862	-0.1395	-0.3202
-3.2667	-0.0162	-0.1314	0.0349	-0.3494	-0.4866	-0.4826	-0.2018	-0.381	-0.289	-0.0679	-0.3087	-0.5215	-0.3774	-0.2597	-0.301	-0.3252	-0.3133	-0.278	-0.5825	-0.0655	-0.466	-0.5368	-0.2582	-0.4139	-0.2116	-0.375	-0.2368	-0.3667	-0.3086	-0.4301	-0.1343	-0.0555	-0.4386	-0.0162	-0.3853	-0.1486	-0.2137	-0.4229	-0.4144	-0.3673	-0.3795	-0.2603	-0.1566	-0.3119	-0.287	-0.3097	-0.3829	-0.138	-0.3266
-3.2333	-0.0191	-0.1183	-0.0045	-0.3493	-0.4883	-0.4806	-0.2016	-0.3795	-0.2847	-0.0679	-0.3074	-0.5254	-0.3754	-0.2643	-0.3161	-0.3212	-0.3238	-0.2913	-0.585	-0.0622	-0.4752	-0.5403	-0.2592	-0.4141	-0.2147	-0.3754	-0.2443	-0.3822	-0.301	-0.4278	-0.1414	-0.0555	-0.4438	-0.0153	-0.3851	-0.1564	-0.2192	-0.4201	-0.4171	-0.374	-0.3851	-0.2666	-0.1508	-0.3167	-0.2888	-0.3097	-0.3793	-0.142	-0.3358
-3.2	-0.0215	-0.1038	-0.0468	-0.3472	-0.4805	-0.4784	-0.1995	-0.3888	-0.272	-0.0631	-0.3032	-0.5284	-0.3686	-0.2572	-0.3353	-0.3242	-0.3282	-0.3078	-0.6053	-0.0593	-0.4831	-0.5296	-0.2629	-0.4082	-0.2173	-0.375	-0.2368	-0.3923	-0.306	-0.4226	-0.1458	-0.0589	-0.4536	-0.012	-0.3842	-0.1648	-0.2246	-0.4144	-0.4175	-0.3745	-0.387	-0.271	-0.1433	-0.3149	-0.2937	-0.3051	-0.3737	-0.1428	-0.3375
-3.1667	-0.0219	-0.09	-0.0639	-0.345	-0.4696	-0.4784	-0.1991	-0.3992	-0.2652	-0.0612	-0.2991	-0.5361	-0.3649	-0.2477	-0.3523	-0.3319	-0.3379	-0.3096	-0.6081	-0.0631	-0.4921	-0.5209	-0.2521	-0.4041	-0.2301	-0.3804	-0.232	-0.4098	-0.3252	-0.4146	-0.1436	-0.0628	-0.4605	-0.0074	-0.3798	-0.1729	-0.2313	-0.4098	-0.4237	-0.3814	-0.3918	-0.2775	-0.1375	-0.3134	-0.3013	-0.3046	-0.3671	-0.1428	-0.3297
-3.1333	-0.0219	-0.0728	-0.0771	-0.3595	-0.4589	-0.4888	-0.201	-0.4049	-0.2562	-0.0603	-0.3075	-0.541	-0.3655	-0.2423	-0.3661	-0.3354	-0.3353	-0.3047	-0.6048	-0.0714	-0.4942	-0.5146	-0.2456	-0.401	-0.2364	-0.3843	-0.2342	-0.4257	-0.326	-0.4078	-0.1428	-0.0652	-0.4596	-0.005	-0.3774	-0.1771	-0.2363	-0.3983	-0.427	-0.3869	-0.3932	-0.2948	-0.129	-0.3302	-0.3053	-0.3048	-0.3628	-0.139	-0.3204
-3.1	-0.0248	-0.0607	-0.0772	-0.3626	-0.4422	-0.4911	-0.2015	-0.4142	-0.2493	-0.0618	-0.3151	-0.5473	-0.3708	-0.2317	-0.3706	-0.3382	-0.3235	-0.3196	-0.6128	-0.0849	-0.4986	-0.5139	-0.2391	-0.405	-0.2461	-0.3939	-0.2375	-0.425	-0.3284	-0.4128	-0.1429	-0.0681	-0.4553	0.0013	-0.3741	-0.1802	-0.2368	-0.3947	-0.425	-0.3923	-0.3932	-0.2925	-0.1207	-0.3548	-0.3097	-0.3017	-0.3614	-0.1337	-0.311
-3.0667	-0.0288	-0.0464	-0.0777	-0.3701	-0.4262	-0.483	-0.2004	-0.4197	-0.2449	-0.0652	-0.3179	-0.5586	-0.3758	-0.2253	-0.3652	-0.3428	-0.3181	-0.3267	-0.6028	-0.097	-0.4937	-0.5039	-0.2322	-0.4135	-0.2495	-0.3994	-0.2354	-0.4312	-0.316	-0.4209	-0.1433	-0.0664	-0.4497	0.0083	-0.3738	-0.1775	-0.2375	-0.3879	-0.4167	-0.3998	-0.393	-0.3088	-0.1155	-0.3612	-0.3146	-0.2984	-0.361	-0.1288	-0.3095
-3.0333	-0.0311	-0.034	-0.0788	-0.378	-0.4135	-0.476	-0.2002	-0.429	-0.2439	-0.0704	-0.3193	-0.5674	-0.3776	-0.2169	-0.3607	-0.3402	-0.3126	-0.3315	-0.6042	-0.0979	-0.4878	-0.5122	-0.2308	-0.4157	-0.2516	-0.3971	-0.234	-0.4375	-0.3114	-0.4188	-0.1347	-0.068	-0.4456	0.015	-0.3729	-0.1791	-0.2381	-0.3825	-0.4148	-0.4163	-0.3924	-0.3156	-0.1209	-0.3869	-0.3168	-0.2963	-0.3643	-0.1306	-0.3105
-3	-0.0383	-0.0238	-0.0794	-0.3856	-0.4076	-0.4683	-0.2003	-0.4346	-0.2419	-0.0735	-0.3246	-0.5726	-0.3789	-0.2103	-0.3491	-0.3413	-0.3162	-0.3468	-0.6115	-0.0851	-0.4854	-0.5156	-0.2348	-0.4163	-0.2486	-0.3913	-0.2314	-0.4429	-0.3083	-0.4188	-0.1234	-0.0723	-0.4423	0.023	-0.3725	-0.1814	-0.2348	-0.3781	-0.4148	-0.4202	-0.3936	-0.3263	-0.1356	-0.3984	-0.3152	-0.2894	-0.3725	-0.1364	-0.3135
-2.9667	-0.0439	-0.0195	-0.0817	-0.393	-0.4041	-0.4699	-0.2023	-0.443	-0.2441	-0.0774	-0.3438	-0.5745	-0.378	-0.2047	-0.3487	-0.3508	-0.3269	-0.358	-0.6298	-0.0737	-0.4842	-0.5164	-0.2335	-0.416	-0.2393	-0.3832	-0.2273	-0.444	-0.3126	-0.4137	-0.1226	-0.0786	-0.4397	0.0331	-0.3697	-0.1838	-0.2425	-0.3693	-0.4009	-0.4185	-0.3941	-0.3306	-0.1657	-0.4023	-0.3148	-0.282	-0.3769	-0.1415	-0.3193
-2.9333	-0.0501	-0.0156	-0.0797	-0.3985	-0.4102	-0.4766	-0.1953	-0.4432	-0.2488	-0.0789	-0.3431	-0.5801	-0.3804	-0.1973	-0.3513	-0.3562	-0.3283	-0.3587	-0.6327	-0.0655	-0.4852	-0.5261	-0.2309	-0.4199	-0.2337	-0.3864	-0.2273	-0.4465	-0.3135	-0.4143	-0.1217	-0.0814	-0.4451	0.0483	-0.37	-0.1855	-0.2446	-0.3661	-0.3988	-0.4105	-0.3914	-0.3355	-0.175	-0.4197	-0.3175	-0.2813	-0.3807	-0.1464	-0.3231
-2.9	-0.0593	-0.0079	-0.0818	-0.4106	-0.4175	-0.4748	-0.1879	-0.4397	-0.2542	-0.0817	-0.3349	-0.5794	-0.3815	-0.1845	-0.3582	-0.3519	-0.3383	-0.3645	-0.63	-0.0644	-0.4872	-0.5304	-0.2246	-0.422	-0.2293	-0.3776	-0.2388	-0.4393	-0.3131	-0.4107	-0.1197	-0.0866	-0.4473	0.0605	-0.3733	-0.1809	-0.2459	-0.3637	-0.3965	-0.4054	-0.3928	-0.3325	-0.1803	-0.4396	-0.3182	-0.2755	-0.3858	-0.152	-0.3243
-2.8667	-0.0669	0.0009	-0.0804	-0.418	-0.4255	-0.476	-0.1832	-0.4399	-0.2567	-0.0814	-0.3262	-0.584	-0.3746	-0.1833	-0.3606	-0.3504	-0.3308	-0.3723	-0.6188	-0.0637	-0.4689	-0.5366	-0.2274	-0.4153	-0.2238	-0.37	-0.2517	-0.4376	-0.3159	-0.4097	-0.1187	-0.0844	-0.4439	0.0542	-0.3763	-0.1744	-0.2447	-0.3632	-0.397	-0.403	-0.3931	-0.3338	-0.183	-0.4484	-0.319	-0.2755	-0.3891	-0.1542	-0.3289
-2.8333	-0.0751	0.0062	-0.0754	-0.4194	-0.4266	-0.4681	-0.1782	-0.4382	-0.2597	-0.0813	-0.3204	-0.5867	-0.3723	-0.1817	-0.3593	-0.3451	-0.3305	-0.3776	-0.621	-0.0676	-0.466	-0.5452	-0.2272	-0.409	-0.2197	-0.3753	-0.2597	-0.4338	-0.3338	-0.4079	-0.1152	-0.0837	-0.4525	0.0552	-0.3789	-0.1734	-0.2404	-0.3642	-0.3937	-0.4073	-0.3907	-0.3351	-0.1845	-0.4447	-0.3257	-0.2711	-0.3924	-0.1589	-0.3311
-2.8	-0.0889	0.0059	-0.0694	-0.4178	-0.4303	-0.4739	-0.177	-0.4347	-0.2619	-0.0815	-0.3209	-0.5894	-0.3768	-0.1769	-0.3559	-0.3372	-0.335	-0.38	-0.6137	-0.0711	-0.4723	-0.5466	-0.2274	-0.4044	-0.2146	-0.383	-0.2648	-0.4212	-0.3306	-0.4085	-0.1102	-0.0805	-0.4578	0.0557	-0.3767	-0.1718	-0.2384	-0.3634	-0.3903	-0.4093	-0.3859	-0.3355	-0.1859	-0.4513	-0.3362	-0.2633	-0.3971	-0.1595	-0.3343
-2.7667	-0.0961	0.0052	-0.0675	-0.418	-0.437	-0.4912	-0.1763	-0.4281	-0.2628	-0.0798	-0.3293	-0.5873	-0.3742	-0.1799	-0.3451	-0.3354	-0.3354	-0.3858	-0.6157	-0.0725	-0.4777	-0.5492	-0.2336	-0.3966	-0.2144	-0.4091	-0.269	-0.4108	-0.3175	-0.4107	-0.1118	-0.0805	-0.4639	0.0564	-0.3796	-0.1726	-0.2422	-0.3673	-0.3942	-0.4048	-0.3824	-0.3405	-0.1909	-0.448	-0.3439	-0.2654	-0.4007	-0.1637	-0.3338
-2.7333	-0.0895	0.0054	-0.0646	-0.4173	-0.438	-0.5053	-0.1822	-0.4129	-0.2617	-0.0786	-0.3304	-0.588	-0.3783	-0.1851	-0.3382	-0.3354	-0.3305	-0.3889	-0.624	-0.0869	-0.4778	-0.5502	-0.2328	-0.3879	-0.2216	-0.4114	-0.2799	-0.4097	-0.3091	-0.4081	-0.1123	-0.0876	-0.4675	0.0639	-0.3722	-0.1717	-0.247	-0.3727	-0.3949	-0.3943	-0.3821	-0.3545	-0.1987	-0.4588	-0.3518	-0.2666	-0.4039	-0.169	-0.3311
-2.7	-0.0854	0.0054	-0.0608	-0.4125	-0.4378	-0.5151	-0.1869	-0.4068	-0.2606	-0.0783	-0.3395	-0.5884	-0.3744	-0.1865	-0.3358	-0.3374	-0.3339	-0.3929	-0.6444	-0.1032	-0.4714	-0.5493	-0.2313	-0.3801	-0.2231	-0.4106	-0.2925	-0.4213	-0.3034	-0.424	-0.1076	-0.0978	-0.473	0.0582	-0.3687	-0.168	-0.2583	-0.3745	-0.4007	-0.3836	-0.3782	-0.3576	-0.2028	-0.4608	-0.3527	-0.2652	-0.4087	-0.1805	-0.3312
-2.6667	-0.081	0.0053	-0.0621	-0.4087	-0.438	-0.5234	-0.1954	-0.3994	-0.2572	-0.0803	-0.3396	-0.586	-0.3727	-0.188	-0.3367	-0.3485	-0.3324	-0.3896	-0.6616	-0.1298	-0.4597	-0.5446	-0.2284	-0.3763	-0.2318	-0.394	-0.3026	-0.4323	-0.3106	-0.4299	-0.1025	-0.1052	-0.479	0.0549	-0.3711	-0.1647	-0.2615	-0.381	-0.4033	-0.3771	-0.3781	-0.3625	-0.2057	-0.4618	-0.3538	-0.2687	-0.4172	-0.1842	-0.3376
-2.6333	-0.0795	0.0087	-0.0667	-0.4065	-0.4321	-0.5255	-0.2095	-0.3939	-0.2631	-0.0778	-0.3431	-0.584	-0.3656	-0.1983	-0.3418	-0.3488	-0.3444	-0.3873	-0.6636	-0.1572	-0.4437	-0.5294	-0.2378	-0.375	-0.2376	-0.4029	-0.3054	-0.4386	-0.3313	-0.4141	-0.0992	-0.1121	-0.4728	0.0605	-0.3737	-0.1616	-0.2643	-0.3896	-0.4044	-0.3644	-0.3787	-0.3702	-0.2041	-0.4678	-0.3562	-0.2796	-0.4213	-0.1829	-0.3437
-2.6	-0.0747	0.0106	-0.0704	-0.401	-0.4346	-0.5241	-0.2258	-0.3866	-0.2623	-0.0793	-0.3442	-0.5781	-0.3558	-0.1983	-0.3394	-0.3495	-0.3502	-0.385	-0.6609	-0.1788	-0.4463	-0.5195	-0.2524	-0.3736	-0.243	-0.4099	-0.3093	-0.4432	-0.3417	-0.4038	-0.0973	-0.1162	-0.474	0.0613	-0.3741	-0.1589	-0.2726	-0.3926	-0.399	-0.3482	-0.3701	-0.3831	-0.2078	-0.4745	-0.3605	-0.2766	-0.4286	-0.1872	-0.3557
-2.5667	-0.0747	0.0124	-0.0729	-0.3976	-0.4388	-0.5193	-0.235	-0.3789	-0.265	-0.0777	-0.3382	-0.577	-0.3501	-0.2074	-0.3406	-0.3521	-0.3492	-0.3872	-0.6558	-0.1865	-0.4551	-0.5056	-0.2664	-0.3686	-0.2522	-0.4158	-0.3021	-0.4421	-0.3487	-0.3979	-0.0953	-0.1301	-0.4712	0.0681	-0.375	-0.1548	-0.2729	-0.3973	-0.4014	-0.3373	-0.3661	-0.3928	-0.2118	-0.4836	-0.3586	-0.2688	-0.4302	-0.1981	-0.3646
-2.5333	-0.0725	0.0128	-0.0758	-0.3941	-0.4448	-0.5176	-0.2293	-0.3728	-0.2705	-0.0724	-0.3309	-0.5777	-0.3407	-0.2175	-0.3413	-0.3521	-0.3539	-0.3928	-0.6434	-0.2008	-0.4643	-0.496	-0.2878	-0.3667	-0.2602	-0.4142	-0.3042	-0.4397	-0.3607	-0.3896	-0.0936	-0.1418	-0.4647	0.0631	-0.3779	-0.1495	-0.27	-0.4024	-0.4001	-0.3402	-0.3678	-0.4023	-0.221	-0.4892	-0.3554	-0.2723	-0.4297	-0.2043	-0.3717
-2.5	-0.068	0.0106	-0.083	-0.3909	-0.45	-0.5111	-0.2355	-0.366	-0.2723	-0.0695	-0.3241	-0.5776	-0.3402	-0.2188	-0.3412	-0.3515	-0.3488	-0.3948	-0.6346	-0.2112	-0.4594	-0.4878	-0.3018	-0.3674	-0.2704	-0.4121	-0.3018	-0.4371	-0.3775	-0.385	-0.0922	-0.1612	-0.457	0.0518	-0.3792	-0.146	-0.2719	-0.4085	-0.3911	-0.3429	-0.3628	-0.4076	-0.231	-0.4945	-0.355	-0.2766	-0.4317	-0.2113	-0.3606
-2.4667	-0.0669	0.0087	-0.0958	-0.3926	-0.4517	-0.5096	-0.2366	-0.3559	-0.2712	-0.0652	-0.3141	-0.5722	-0.3371	-0.2268	-0.3362	-0.3504	-0.3531	-0.3933	-0.6229	-0.2259	-0.4612	-0.479	-0.3202	-0.372	-0.2806	-0.4129	-0.3041	-0.4326	-0.3957	-0.386	-0.0892	-0.1621	-0.4491	0.0484	-0.3788	-0.1465	-0.2825	-0.4112	-0.3848	-0.3375	-0.3623	-0.419	-0.2404	-0.4965	-0.3546	-0.281	-0.4315	-0.2215	-0.3615
-2.4333	-0.0676	0.0046	-0.1062	-0.3954	-0.4507	-0.5056	-0.2389	-0.3482	-0.2739	-0.0637	-0.312	-0.5656	-0.3438	-0.237	-0.3318	-0.344	-0.3515	-0.3909	-0.6149	-0.2329	-0.4672	-0.4742	-0.3324	-0.3721	-0.2892	-0.4102	-0.3006	-0.4277	-0.4113	-0.3964	-0.0913	-0.1745	-0.4463	0.0404	-0.3766	-0.1427	-0.2833	-0.4134	-0.3814	-0.3378	-0.359	-0.4256	-0.2505	-0.4966	-0.3476	-0.2847	-0.4307	-0.2347	-0.354
-2.4	-0.0701	-0.0015	-0.1077	-0.3935	-0.4505	-0.504	-0.2392	-0.3447	-0.2711	-0.0669	-0.3098	-0.5592	-0.3354	-0.2336	-0.3272	-0.3377	-0.3516	-0.3883	-0.609	-0.2325	-0.4723	-0.471	-0.3539	-0.3758	-0.2975	-0.4061	-0.2992	-0.4313	-0.4281	-0.3781	-0.0937	-0.1834	-0.4441	0.0315	-0.3755	-0.1426	-0.2836	-0.4184	-0.3718	-0.3481	-0.3591	-0.4272	-0.2522	-0.5027	-0.3449	-0.2964	-0.43	-0.2396	-0.3518
-2.3667	-0.0703	-0.0056	-0.1033	-0.3938	-0.4526	-0.5111	-0.2418	-0.3394	-0.2742	-0.073	-0.3187	-0.5572	-0.3289	-0.2282	-0.3192	-0.3329	-0.342	-0.3867	-0.601	-0.2366	-0.4765	-0.464	-0.3639	-0.3777	-0.3046	-0.4042	-0.2921	-0.4346	-0.4407	-0.3735	-0.095	-0.1836	-0.4354	0.0121	-0.3729	-0.1415	-0.2795	-0.422	-0.3671	-0.3563	-0.3559	-0.4343	-0.248	-0.5083	-0.3451	-0.3024	-0.4296	-0.2426	-0.3547
-2.3333	-0.076	-0.0076	-0.1125	-0.3906	-0.4506	-0.5142	-0.2391	-0.3372	-0.2739	-0.0698	-0.3198	-0.552	-0.3267	-0.2219	-0.3246	-0.3308	-0.344	-0.3853	-0.5997	-0.2338	-0.4811	-0.4631	-0.3762	-0.3791	-0.3084	-0.4077	-0.2835	-0.433	-0.4472	-0.3727	-0.0967	-0.1831	-0.4351	0.0049	-0.3706	-0.1423	-0.2786	-0.4269	-0.361	-0.3563	-0.3553	-0.4375	-0.2433	-0.5076	-0.3446	-0.3039	-0.4274	-0.2476	-0.3508
-2.3	-0.0751	-0.0107	-0.1222	-0.3882	-0.4465	-0.5217	-0.2426	-0.3395	-0.2711	-0.0685	-0.3179	-0.5442	-0.3341	-0.2165	-0.3315	-0.329	-0.3422	-0.3799	-0.5948	-0.2268	-0.4865	-0.4698	-0.3767	-0.3785	-0.3143	-0.4093	-0.2783	-0.4318	-0.4506	-0.3671	-0.0993	-0.1885	-0.4465	-0.0092	-0.3685	-0.1427	-0.2768	-0.4312	-0.3547	-0.3571	-0.353	-0.4402	-0.237	-0.5006	-0.3438	-0.3151	-0.4312	-0.2485	-0.349
-2.2667	-0.0846	-0.0152	-0.1258	-0.3849	-0.4404	-0.5242	-0.2428	-0.3439	-0.2737	-0.0672	-0.3249	-0.5371	-0.3385	-0.2138	-0.3386	-0.3285	-0.343	-0.3774	-0.5985	-0.2205	-0.4944	-0.4806	-0.3627	-0.3825	-0.3167	-0.4087	-0.2658	-0.428	-0.4547	-0.3558	-0.1006	-0.1929	-0.4477	-0.022	-0.3675	-0.1402	-0.2756	-0.4351	-0.3518	-0.3529	-0.3516	-0.4414	-0.2291	-0.4915	-0.3464	-0.324	-0.4384	-0.2444	-0.3449
-2.2333	-0.0938	-0.0197	-0.1336	-0.382	-0.4405	-0.5235	-0.2497	-0.3447	-0.2765	-0.0669	-0.3306	-0.5265	-0.339	-0.2133	-0.3451	-0.3322	-0.3357	-0.3667	-0.5998	-0.2176	-0.4973	-0.493	-0.35	-0.3828	-0.318	-0.4087	-0.2637	-0.4289	-0.4561	-0.3511	-0.1014	-0.1917	-0.4475	-0.0345	-0.3659	-0.138	-0.2755	-0.4356	-0.3541	-0.342	-0.3529	-0.442	-0.2188	-0.4869	-0.3541	-0.3307	-0.4427	-0.2375	-0.3333
-2.2	-0.0994	-0.0201	-0.1479	-0.387	-0.4404	-0.5253	-0.2514	-0.345	-0.2758	-0.0584	-0.3381	-0.5195	-0.3344	-0.2102	-0.3462	-0.336	-0.3318	-0.3621	-0.6061	-0.2189	-0.4963	-0.4979	-0.3374	-0.382	-0.3187	-0.4097	-0.2564	-0.4277	-0.4544	-0.3456	-0.1021	-0.1893	-0.4497	-0.0478	-0.3617	-0.1401	-0.272	-0.4367	-0.3517	-0.3282	-0.3526	-0.4412	-0.207	-0.4809	-0.3565	-0.3396	-0.4433	-0.2318	-0.3318
-2.1667	-0.1095	-0.0189	-0.15	-0.3819	-0.4475	-0.5277	-0.2493	-0.3483	-0.2767	-0.0549	-0.3393	-0.5134	-0.3278	-0.2064	-0.3492	-0.34	-0.33	-0.3562	-0.6048	-0.2251	-0.4958	-0.4978	-0.3314	-0.3788	-0.3172	-0.4101	-0.2478	-0.4194	-0.4517	-0.3501	-0.1054	-0.1809	-0.4471	-0.0683	-0.3575	-0.1371	-0.273	-0.4352	-0.3454	-0.3232	-0.3508	-0.4348	-0.1968	-0.4805	-0.3611	-0.3411	-0.4506	-0.2279	-0.3316
-2.1333	-0.1117	-0.0196	-0.1597	-0.3821	-0.4412	-0.5246	-0.2501	-0.3512	-0.2781	-0.0584	-0.3369	-0.5106	-0.3153	-0.1977	-0.3428	-0.3426	-0.3281	-0.351	-0.6016	-0.2262	-0.5068	-0.4887	-0.3366	-0.3721	-0.3168	-0.4102	-0.2412	-0.4177	-0.449	-0.3461	-0.1069	-0.1686	-0.4441	-0.0758	-0.3545	-0.1302	-0.2721	-0.4332	-0.3375	-0.324	-0.3511	-0.4262	-0.1905	-0.4789	-0.3617	-0.3422	-0.454	-0.2264	-0.3272
-2.1	-0.11	-0.0235	-0.1588	-0.3717	-0.4386	-0.4987	-0.2569	-0.3544	-0.2794	-0.0693	-0.335	-0.5067	-0.3032	-0.1934	-0.3429	-0.3424	-0.3244	-0.3474	-0.5925	-0.2272	-0.5072	-0.4784	-0.3471	-0.3652	-0.3156	-0.4085	-0.2399	-0.4147	-0.4409	-0.3479	-0.1171	-0.1592	-0.4395	-0.0803	-0.3544	-0.1237	-0.274	-0.4325	-0.3368	-0.3234	-0.3497	-0.4143	-0.1866	-0.4753	-0.3579	-0.3431	-0.4528	-0.2285	-0.3216
-2.0667	-0.1117	-0.0261	-0.1582	-0.3697	-0.4352	-0.4955	-0.2607	-0.3665	-0.2798	-0.0723	-0.3378	-0.5125	-0.2811	-0.1944	-0.3424	-0.3441	-0.3109	-0.3521	-0.5829	-0.2495	-0.512	-0.4739	-0.3596	-0.3569	-0.3113	-0.4131	-0.2469	-0.4283	-0.4235	-0.3632	-0.1189	-0.1483	-0.4387	-0.06	-0.3508	-0.1168	-0.2751	-0.4333	-0.3384	-0.3173	-0.3452	-0.4046	-0.1871	-0.469	-0.3566	-0.3435	-0.4469	-0.2267	-0.3117
-2.0333	-0.1133	-0.0244	-0.1514	-0.3596	-0.4327	-0.4845	-0.2696	-0.3749	-0.275	-0.073	-0.3439	-0.5175	-0.2616	-0.1961	-0.3369	-0.3454	-0.3152	-0.3514	-0.5632	-0.2666	-0.5131	-0.4698	-0.3706	-0.3514	-0.3153	-0.4205	-0.2525	-0.4276	-0.408	-0.3554	-0.1197	-0.1365	-0.4387	-0.0633	-0.3484	-0.1097	-0.2769	-0.4356	-0.345	-0.311	-0.3463	-0.3997	-0.1871	-0.4646	-0.3601	-0.3428	-0.437	-0.2283	-0.2965
-2	-0.1156	-0.0183	-0.1477	-0.357	-0.4299	-0.4753	-0.2753	-0.3807	-0.2805	-0.0799	-0.3418	-0.5313	-0.2427	-0.1992	-0.3375	-0.3463	-0.3229	-0.3504	-0.5471	-0.2723	-0.5187	-0.466	-0.3738	-0.3518	-0.318	-0.4253	-0.2585	-0.4277	-0.3986	-0.346	-0.1281	-0.129	-0.4361	-0.0651	-0.3485	-0.0993	-0.2789	-0.4404	-0.3474	-0.3111	-0.3423	-0.4038	-0.1911	-0.4561	-0.359	-0.3392	-0.4279	-0.2244	-0.2803
-1.9667	-0.1146	-0.0138	-0.148	-0.3566	-0.4334	-0.4718	-0.2793	-0.3811	-0.2788	-0.0737	-0.3453	-0.5359	-0.2336	-0.1991	-0.3369	-0.3501	-0.32	-0.3489	-0.5399	-0.2787	-0.5194	-0.4671	-0.378	-0.35	-0.3206	-0.4305	-0.2688	-0.4317	-0.39	-0.3347	-0.1351	-0.1266	-0.4377	-0.063	-0.3509	-0.0951	-0.2772	-0.4434	-0.3477	-0.2981	-0.3378	-0.4209	-0.1966	-0.4517	-0.361	-0.3305	-0.4104	-0.2249	-0.2762
-1.9333	-0.1122	-0.0036	-0.1403	-0.3503	-0.4498	-0.4637	-0.2866	-0.3842	-0.28	-0.0643	-0.3477	-0.5401	-0.2314	-0.1967	-0.333	-0.3502	-0.3116	-0.345	-0.5335	-0.2909	-0.5147	-0.4674	-0.378	-0.35	-0.3251	-0.4323	-0.273	-0.4598	-0.3794	-0.3196	-0.138	-0.129	-0.4337	-0.0605	-0.3514	-0.0888	-0.276	-0.4467	-0.3519	-0.2897	-0.339	-0.4243	-0.1995	-0.4447	-0.3598	-0.3229	-0.4076	-0.23	-0.2674
-1.9	-0.1094	0.0087	-0.1379	-0.3525	-0.4547	-0.4609	-0.2873	-0.3915	-0.2821	-0.0548	-0.3579	-0.5422	-0.225	-0.1847	-0.3346	-0.3499	-0.3095	-0.3393	-0.5138	-0.2881	-0.5102	-0.4611	-0.3857	-0.348	-0.3232	-0.4333	-0.2746	-0.464	-0.3823	-0.3335	-0.143	-0.1281	-0.4326	-0.058	-0.3525	-0.0884	-0.2775	-0.4485	-0.3539	-0.2744	-0.3375	-0.4281	-0.2029	-0.4377	-0.3609	-0.3142	-0.4039	-0.2309	-0.2621
-1.8667	-0.1107	0.0187	-0.1366	-0.3508	-0.4577	-0.4534	-0.29	-0.3941	-0.2921	-0.0533	-0.3584	-0.54	-0.2223	-0.1802	-0.3349	-0.3485	-0.3106	-0.3353	-0.4944	-0.284	-0.5068	-0.4526	-0.3848	-0.3449	-0.3188	-0.4371	-0.2765	-0.4726	-0.3752	-0.3322	-0.1354	-0.1284	-0.4293	-0.0562	-0.354	-0.0843	-0.28	-0.4476	-0.3608	-0.2649	-0.3352	-0.4255	-0.2006	-0.4297	-0.3607	-0.3088	-0.3971	-0.2278	-0.258
-1.8333	-0.1121	0.0292	-0.1325	-0.3458	-0.4632	-0.4524	-0.2966	-0.4059	-0.2998	-0.0572	-0.3591	-0.5388	-0.2189	-0.1705	-0.332	-0.3453	-0.3146	-0.3335	-0.4872	-0.2929	-0.5004	-0.4516	-0.3843	-0.3421	-0.3203	-0.4363	-0.2821	-0.4783	-0.3663	-0.329	-0.1337	-0.1266	-0.4297	-0.0555	-0.3546	-0.0775	-0.2831	-0.447	-0.3642	-0.2608	-0.3337	-0.4261	-0.1916	-0.4188	-0.3565	-0.3051	-0.3907	-0.2254	-0.2543
-1.8	-0.1126	0.0318	-0.1273	-0.3418	-0.4647	-0.4464	-0.3042	-0.4135	-0.3189	-0.0582	-0.3561	-0.5422	-0.2167	-0.1646	-0.3255	-0.3431	-0.3113	-0.3279	-0.4802	-0.2886	-0.4923	-0.4478	-0.3766	-0.3397	-0.325	-0.4367	-0.2813	-0.4751	-0.3637	-0.329	-0.1301	-0.1219	-0.4354	-0.0533	-0.3561	-0.0739	-0.2827	-0.4455	-0.3679	-0.2553	-0.3338	-0.4209	-0.1876	-0.4126	-0.3581	-0.3065	-0.3821	-0.2191	-0.2463
-1.7667	-0.1103	0.034	-0.1296	-0.336	-0.4631	-0.4479	-0.3156	-0.4147	-0.3089	-0.0644	-0.3482	-0.5409	-0.2144	-0.157	-0.3154	-0.3406	-0.2954	-0.3184	-0.4799	-0.2836	-0.492	-0.4503	-0.3517	-0.3396	-0.3291	-0.4395	-0.2816	-0.4752	-0.346	-0.3271	-0.1269	-0.1205	-0.4322	-0.0521	-0.3563	-0.0666	-0.2841	-0.4424	-0.3743	-0.2537	-0.3354	-0.4047	-0.1833	-0.4035	-0.3579	-0.3121	-0.3759	-0.2155	-0.235
-1.7333	-0.1059	0.0367	-0.1376	-0.3349	-0.459	-0.4502	-0.3278	-0.4157	-0.3129	-0.0703	-0.3412	-0.5408	-0.2151	-0.1521	-0.3087	-0.3421	-0.2862	-0.3114	-0.4805	-0.2798	-0.4834	-0.4561	-0.3338	-0.3393	-0.3303	-0.4383	-0.2897	-0.4807	-0.3401	-0.3248	-0.1193	-0.122	-0.431	-0.0518	-0.3585	-0.0609	-0.2873	-0.4386	-0.3843	-0.2562	-0.3354	-0.3943	-0.1844	-0.3928	-0.3552	-0.3152	-0.3717	-0.2127	-0.2265
-1.7	-0.1015	0.0377	-0.1455	-0.3354	-0.4604	-0.4516	-0.3252	-0.4122	-0.3068	-0.0759	-0.3338	-0.5381	-0.2174	-0.148	-0.3068	-0.339	-0.286	-0.3049	-0.4677	-0.2845	-0.4773	-0.4611	-0.3305	-0.3426	-0.3324	-0.4379	-0.2918	-0.4814	-0.3293	-0.3301	-0.1214	-0.1257	-0.4322	-0.0546	-0.3624	-0.0601	-0.2897	-0.4336	-0.3834	-0.2583	-0.3334	-0.3883	-0.1877	-0.3899	-0.3557	-0.3133	-0.3678	-0.2078	-0.215
-1.66667	-0.098	0.0408	-0.1502	-0.3338	-0.4565	-0.4582	-0.3266	-0.4112	-0.3037	-0.0762	-0.3304	-0.5347	-0.2157	-0.1487	-0.3115	-0.3359	-0.2755	-0.2953	-0.4494	-0.2813	-0.4701	-0.4676	-0.3246	-0.3476	-0.3366	-0.4376	-0.2937	-0.4867	-0.3219	-0.3367	-0.119	-0.1287	-0.4298	-0.0541	-0.3624	-0.0544	-0.2894	-0.4268	-0.3816	-0.2559	-0.3346	-0.3882	-0.1913	-0.3906	-0.3541	-0.3052	-0.3631	-0.1999	-0.2088
-1.63333	-0.1001	0.0446	-0.1459	-0.3311	-0.4559	-0.4698	-0.3336	-0.4094	-0.3008	-0.0829	-0.3146	-0.5302	-0.2082	-0.1608	-0.3089	-0.3355	-0.2527	-0.2865	-0.4339	-0.2853	-0.456	-0.4661	-0.3145	-0.3497	-0.3351	-0.4336	-0.2891	-0.4891	-0.3163	-0.3376	-0.1187	-0.133	-0.4223	-0.0501	-0.3604	-0.0473	-0.288	-0.4166	-0.3797	-0.2476	-0.3355	-0.387	-0.1912	-0.3895	-0.3556	-0.2868	-0.3603	-0.1915	-0.1963
-1.6	-0.1072	0.0482	-0.1328	-0.3239	-0.4664	-0.4844	-0.3413	-0.4103	-0.2987	-0.0873	-0.3057	-0.5193	-0.2021	-0.1681	-0.3115	-0.3362	-0.246	-0.2758	-0.4257	-0.2617	-0.4426	-0.4637	-0.3077	-0.3442	-0.3328	-0.4272	-0.2926	-0.4845	-0.313	-0.3325	-0.1155	-0.1382	-0.4129	-0.0475	-0.3574	-0.0434	-0.2866	-0.4094	-0.3825	-0.2363	-0.3346	-0.3784	-0.2015	-0.39	-0.3582	-0.2828	-0.3553	-0.1855	-0.1922
-1.56667	-0.1035	0.0534	-0.1206	-0.3193	-0.4755	-0.4906	-0.3439	-0.4133	-0.297	-0.0937	-0.2977	-0.5135	-0.2141	-0.1603	-0.3173	-0.3342	-0.2474	-0.2665	-0.4264	-0.2564	-0.4394	-0.4688	-0.3049	-0.3433	-0.3283	-0.4219	-0.29	-0.483	-0.3085	-0.328	-0.1155	-0.1459	-0.4065	-0.0383	-0.3567	-0.0354	-0.2852	-0.4071	-0.3803	-0.2306	-0.3334	-0.3712	-0.2103	-0.3897	-0.3613	-0.2876	-0.3542	-0.1837	-0.1943
-1.53333	-0.1059	0.0538	-0.1152	-0.3206	-0.4871	-0.5	-0.3567	-0.4155	-0.2943	-0.093	-0.2865	-0.5087	-0.2197	-0.1561	-0.3193	-0.3369	-0.2366	-0.2632	-0.4247	-0.2482	-0.4334	-0.4805	-0.3019	-0.3468	-0.3243	-0.4216	-0.2935	-0.4837	-0.2991	-0.3304	-0.1153	-0.153	-0.3998	-0.0335	-0.3524	-0.0285	-0.2809	-0.4072	-0.3813	-0.2287	-0.3313	-0.3622	-0.2203	-0.3908	-0.3627	-0.2868	-0.3518	-0.1858	-0.1921
-1.5	-0.1058	0.0544	-0.1122	-0.3204	-0.4986	-0.5023	-0.3593	-0.4162	-0.2985	-0.0951	-0.2677	-0.5095	-0.2255	-0.1643	-0.3226	-0.3397	-0.2289	-0.2591	-0.4282	-0.2418	-0.4321	-0.4905	-0.3082	-0.3443	-0.3213	-0.4214	-0.2932	-0.4786	-0.2961	-0.341	-0.1152	-0.1583	-0.3965	-0.0345	-0.3487	-0.0269	-0.2749	-0.4068	-0.3857	-0.2222	-0.3283	-0.3557	-0.2258	-0.3915	-0.3682	-0.2869	-0.3484	-0.1837	-0.2029
-1.46667	-0.1047	0.0576	-0.1077	-0.3242	-0.5103	-0.5061	-0.3637	-0.4159	-0.2917	-0.0958	-0.2565	-0.5092	-0.2257	-0.1602	-0.3237	-0.3428	-0.2234	-0.2567	-0.4309	-0.2196	-0.4367	-0.5034	-0.3088	-0.338	-0.3194	-0.4195	-0.291	-0.4715	-0.2892	-0.362	-0.1091	-0.1609	-0.3926	-0.028	-0.3467	-0.0184	-0.2689	-0.4067	-0.3846	-0.2172	-0.3258	-0.3548	-0.2287	-0.3929	-0.3684	-0.2857	-0.3446	-0.1916	-0.2106
-1.43333	-0.1045	0.0581	-0.107	-0.3297	-0.5193	-0.504	-0.3666	-0.4146	-0.2872	-0.0937	-0.2492	-0.5105	-0.2283	-0.1641	-0.3212	-0.3496	-0.2259	-0.2596	-0.4335	-0.232	-0.4426	-0.5161	-0.312	-0.3353	-0.3217	-0.4218	-0.2892	-0.469	-0.2811	-0.3874	-0.1053	-0.162	-0.3923	-0.0227	-0.3459	-0.0122	-0.2695	-0.4102	-0.3877	-0.2132	-0.3208	-0.3571	-0.2256	-0.3917	-0.3667	-0.2856	-0.3414	-0.1968	-0.2132
-1.4	-0.1057	0.0624	-0.1171	-0.3343	-0.5343	-0.5054	-0.3662	-0.4123	-0.2851	-0.0874	-0.2411	-0.5103	-0.2275	-0.1623	-0.3227	-0.3488	-0.2218	-0.2602	-0.4297	-0.2394	-0.4424	-0.5192	-0.3232	-0.3276	-0.3238	-0.4222	-0.2885	-0.464	-0.2751	-0.4024	-0.1014	-0.1659	-0.3898	-0.0243	-0.3461	-0.006	-0.269	-0.4103	-0.3876	-0.2084	-0.3204	-0.357	-0.2232	-0.3894	-0.3639	-0.2781	-0.3395	-0.1985	-0.2141
-1.36667	-0.1098	0.0683	-0.1272	-0.3359	-0.5372	-0.5115	-0.3651	-0.4139	-0.2799	-0.0764	-0.2423	-0.506	-0.2261	-0.1637	-0.3163	-0.3517	-0.2139	-0.2603	-0.4258	-0.2425	-0.4392	-0.5259	-0.3302	-0.3299	-0.3265	-0.4142	-0.2877	-0.4666	-0.2706	-0.384	-0.0981	-0.1741	-0.3859	-0.0222	-0.345	0.0033	-0.2679	-0.413	-0.3877	-0.2123	-0.3204	-0.3608	-0.2189	-0.3879	-0.3639	-0.2678	-0.3357	-0.1977	-0.2127
-1.33333	-0.1039	0.0728	-0.1325	-0.3374	-0.5431	-0.5195	-0.3633	-0.416	-0.2742	-0.0697	-0.2415	-0.5064	-0.2276	-0.1575	-0.3047	-0.3559	-0.2009	-0.2597	-0.4179	-0.2468	-0.4401	-0.5277	-0.3269	-0.3319	-0.3333	-0.4124	-0.2836	-0.4567	-0.2695	-0.3727	-0.094	-0.178	-0.3751	-0.0209	-0.3467	0.0014	-0.2693	-0.4122	-0.388	-0.2108	-0.3229	-0.3656	-0.217	-0.3802	-0.3591	-0.2663	-0.3305	-0.1954	-0.2075
-1.3	-0.1094	0.0794	-0.1714	-0.3324	-0.5372	-0.5248	-0.3638	-0.4213	-0.2693	-0.0667	-0.2369	-0.5068	-0.2269	-0.1583	-0.3027	-0.3591	-0.2228	-0.2579	-0.4124	-0.2536	-0.4422	-0.5259	-0.3376	-0.3308	-0.3355	-0.4066	-0.2798	-0.4518	-0.2683	-0.3652	-0.0893	-0.1819	-0.3728	-0.0194	-0.346	-0.0023	-0.2731	-0.4101	-0.3947	-0.2116	-0.328	-0.3781	-0.2154	-0.374	-0.3583	-0.2688	-0.325	-0.1932	-0.2004
-1.26667	-0.1071	0.0888	-0.1735	-0.3323	-0.5287	-0.5278	-0.3631	-0.4231	-0.2653	-0.0634	-0.2385	-0.5086	-0.2258	-0.1603	-0.303	-0.359	-0.2151	-0.2551	-0.4122	-0.2493	-0.4432	-0.5237	-0.3499	-0.3319	-0.3317	-0.4007	-0.277	-0.4457	-0.2729	-0.3591	-0.0848	-0.1857	-0.3665	-0.0228	-0.3455	0.003	-0.2692	-0.4078	-0.3999	-0.213	-0.3255	-0.3867	-0.2159	-0.3634	-0.3582	-0.2663	-0.3232	-0.1918	-0.1983
-1.23333	-0.111	0.0946	-0.1701	-0.3338	-0.5102	-0.5251	-0.3648	-0.423	-0.2618	-0.0616	-0.2323	-0.5101	-0.2305	-0.156	-0.3053	-0.359	-0.2151	-0.2515	-0.4036	-0.2416	-0.4443	-0.5243	-0.3626	-0.3287	-0.3283	-0.3955	-0.2716	-0.4389	-0.283	-0.3608	-0.085	-0.1893	-0.3561	-0.0279	-0.3446	-0.004	-0.2673	-0.4116	-0.4074	-0.2185	-0.3239	-0.3873	-0.2115	-0.3525	-0.3561	-0.2641	-0.3203	-0.191	-0.1943
-1.2	-0.1135	0.0954	-0.1726	-0.3421	-0.4936	-0.5186	-0.3528	-0.417	-0.26	-0.0618	-0.2351	-0.5104	-0.227	-0.148	-0.3045	-0.3612	-0.222	-0.247	-0.3935	-0.2107	-0.4502	-0.522	-0.3651	-0.3285	-0.3302	-0.3951	-0.2723	-0.4378	-0.3011	-0.3677	-0.0848	-0.1927	-0.3522	-0.033	-0.3427	-0.008	-0.2658	-0.4142	-0.4139	-0.2261	-0.3241	-0.3753	-0.2079	-0.3422	-0.3435	-0.2629	-0.3215	-0.1918	-0.192
-1.16667	-0.1171	0.1003	-0.1787	-0.3364	-0.4881	-0.5134	-0.354	-0.4119	-0.2615	-0.0693	-0.2395	-0.5062	-0.2221	-0.1497	-0.3046	-0.3636	-0.2187	-0.2464	-0.3889	-0.1947	-0.4547	-0.5187	-0.3707	-0.325	-0.3295	-0.3909	-0.2721	-0.4339	-0.3149	-0.3656	-0.0908	-0.1941	-0.3509	-0.0319	-0.3405	-0.0116	-0.2682	-0.4139	-0.4223	-0.2294	-0.3242	-0.3677	-0.2046	-0.3394	-0.3345	-0.2663	-0.3246	-0.1869	-0.1938
-1.13333	-0.1201	0.0969	-0.1598	-0.3315	-0.488	-0.5105	-0.353	-0.4134	-0.266	-0.0694	-0.2437	-0.5097	-0.2265	-0.15	-0.309	-0.3668	-0.2185	-0.246	-0.3866	-0.196	-0.46	-0.514	-0.383	-0.3262	-0.3303	-0.384	-0.2797	-0.4366	-0.3164	-0.3698	-0.09	-0.1905	-0.3462	-0.0306	-0.3367	-0.0119	-0.2671	-0.4101	-0.4281	-0.2298	-0.3222	-0.3532	-0.2083	-0.3326	-0.3278	-0.2695	-0.327	-0.1725	-0.1889
-1.1	-0.123	0.0873	-0.1677	-0.3216	-0.4864	-0.5074	-0.3506	-0.4066	-0.2669	-0.0692	-0.2407	-0.5102	-0.2324	-0.1561	-0.3076	-0.366	-0.2151	-0.2498	-0.3932	-0.1807	-0.4725	-0.5028	-0.3929	-0.3252	-0.3395	-0.3765	-0.2925	-0.4451	-0.3151	-0.3703	-0.0873	-0.1791	-0.3298	-0.0311	-0.335	-0.0131	-0.2692	-0.4081	-0.4337	-0.2293	-0.3153	-0.3384	-0.2078	-0.3292	-0.3222	-0.2729	-0.3309	-0.1664	-0.1814
-1.06667	-0.1265	0.0796	-0.1676	-0.3096	-0.4812	-0.5061	-0.3447	-0.4159	-0.2653	-0.0706	-0.2365	-0.5137	-0.2391	-0.155	-0.2958	-0.3666	-0.2184	-0.2584	-0.3943	-0.1721	-0.4926	-0.4912	-0.3987	-0.3192	-0.3407	-0.379	-0.3013	-0.4405	-0.3105	-0.3737	-0.0872	-0.1765	-0.3265	-0.0342	-0.3366	-0.018	-0.2724	-0.4082	-0.4424	-0.2317	-0.3037	-0.3128	-0.2096	-0.3258	-0.3178	-0.2808	-0.337	-0.1627	-0.177
-1.03333	-0.1272	0.0753	-0.1397	-0.3087	-0.4675	-0.5092	-0.3398	-0.3997	-0.2617	-0.0746	-0.2423	-0.5125	-0.2441	-0.1607	-0.2912	-0.3649	-0.2249	-0.2604	-0.4302	-0.1703	-0.4996	-0.4757	-0.4095	-0.3213	-0.3382	-0.3767	-0.3036	-0.4416	-0.3085	-0.3754	-0.0863	-0.1688	-0.323	-0.0368	-0.3363	-0.0205	-0.2729	-0.4099	-0.4387	-0.231	-0.2917	-0.2905	-0.2101	-0.3253	-0.3147	-0.2919	-0.3428	-0.1629	-0.173
-1	-0.1265	0.0712	-0.1391	-0.3051	-0.4632	-0.5139	-0.3269	-0.4101	-0.2602	-0.0785	-0.2482	-0.5112	-0.2623	-0.1676	-0.3014	-0.3617	-0.2203	-0.2659	-0.405	-0.1725	-0.5073	-0.4543	-0.4204	-0.3222	-0.3376	-0.3768	-0.3096	-0.4429	-0.3084	-0.38	-0.0862	-0.1583	-0.3214	-0.0394	-0.3332	-0.0263	-0.2688	-0.414	-0.4327	-0.2397	-0.2811	-0.2724	-0.2109	-0.3231	-0.3104	-0.3105	-0.3492	-0.1613	-0.1711
-0.96667	-0.1255	0.0623	-0.1204	-0.3056	-0.4657	-0.5181	-0.3194	-0.3929	-0.2552	-0.0843	-0.2513	-0.5107	-0.2889	-0.1762	-0.3055	-0.3563	-0.2198	-0.2722	-0.3753	-0.1685	-0.5085	-0.4363	-0.4305	-0.3209	-0.3371	-0.3787	-0.3127	-0.4429	-0.3096	-0.3825	-0.0712	-0.146	-0.3183	-0.0433	-0.3315	-0.0248	-0.2695	-0.4139	-0.4307	-0.2485	-0.2765	-0.2525	-0.2084	-0.3212	-0.2989	-0.3373	-0.3567	-0.1633	-0.1632
-0.93333	-0.1218	0.0533	-0.1265	-0.2917	-0.4672	-0.5218	-0.3281	-0.401	-0.2561	-0.0949	-0.251	-0.5048	-0.3021	-0.1853	-0.3081	-0.3523	-0.2255	-0.2733	-0.3517	-0.1685	-0.5056	-0.4171	-0.4124	-0.3223	-0.338	-0.3801	-0.3205	-0.4443	-0.3135	-0.3811	-0.0734	-0.1401	-0.309	-0.0433	-0.3333	-0.0207	-0.2686	-0.4162	-0.4293	-0.2612	-0.2673	-0.2346	-0.2092	-0.3218	-0.2904	-0.3568	-0.3597	-0.165	-0.1547
-0.9	-0.1199	0.0428	-0.1167	-0.2874	-0.4756	-0.5255	-0.3255	-0.3972	-0.2533	-0.1003	-0.2575	-0.4999	-0.314	-0.1903	-0.3142	-0.3494	-0.2327	-0.2714	-0.3203	-0.1678	-0.4985	-0.3975	-0.416	-0.3234	-0.3381	-0.3819	-0.3292	-0.4479	-0.3126	-0.3798	-0.0766	-0.1308	-0.2998	-0.0444	-0.3341	-0.0202	-0.2695	-0.4204	-0.4248	-0.2693	-0.2623	-0.2257	-0.2059	-0.3174	-0.2849	-0.3632	-0.3601	-0.1631	-0.1537
-0.86667	-0.1174	0.0277	-0.1231	-0.2882	-0.4748	-0.5273	-0.3283	-0.3918	-0.2509	-0.1048	-0.2585	-0.497	-0.328	-0.2003	-0.3151	-0.3453	-0.2414	-0.2686	-0.2931	-0.1644	-0.4984	-0.3781	-0.4076	-0.3245	-0.3387	-0.3819	-0.3455	-0.4502	-0.3047	-0.3766	-0.079	-0.1313	-0.3074	-0.0498	-0.3355	-0.025	-0.2721	-0.4228	-0.4277	-0.2692	-0.2649	-0.2224	-0.2001	-0.3124	-0.2806	-0.3825	-0.3585	-0.1605	-0.1461
-0.83333	-0.115	0.0335	-0.135	-0.2944	-0.4768	-0.5241	-0.3278	-0.3828	-0.252	-0.1154	-0.2609	-0.4935	-0.3377	-0.2059	-0.306	-0.331	-0.2401	-0.2708	-0.2954	-0.1722	-0.4926	-0.3622	-0.3959	-0.3209	-0.3383	-0.3834	-0.353	-0.4525	-0.2914	-0.3727	-0.0845	-0.1287	-0.3059	-0.0469	-0.3378	-0.0303	-0.2734	-0.4271	-0.426	-0.261	-0.2636	-0.214	-0.1948	-0.3057	-0.2812	-0.3858	-0.3505	-0.1621	-0.1368
-0.8	-0.115	0.03	-0.1642	-0.2933	-0.4799	-0.5247	-0.3231	-0.3776	-0.2487	-0.1173	-0.2718	-0.4893	-0.3562	-0.2082	-0.3054	-0.3301	-0.2431	-0.2769	-0.2762	-0.1825	-0.4939	-0.3607	-0.3741	-0.3186	-0.3329	-0.3826	-0.3628	-0.4527	-0.2833	-0.3754	-0.089	-0.132	-0.307	-0.0471	-0.3422	-0.0283	-0.278	-0.4289	-0.4232	-0.259	-0.2592	-0.2131	-0.1875	-0.312	-0.284	-0.385	-0.3464	-0.1623	-0.1297
-0.76667	-0.1123	0.0217	-0.1724	-0.2936	-0.4728	-0.5311	-0.3197	-0.3771	-0.2467	-0.122	-0.2781	-0.486	-0.3597	-0.2154	-0.2997	-0.3254	-0.2452	-0.2795	-0.2897	-0.1914	-0.4987	-0.3653	-0.3722	-0.32	-0.3308	-0.3859	-0.3925	-0.4538	-0.2725	-0.3782	-0.0905	-0.1377	-0.3061	-0.0502	-0.345	-0.0372	-0.2757	-0.4324	-0.4199	-0.2562	-0.258	-0.2118	-0.1825	-0.3235	-0.2983	-0.3864	-0.3411	-0.1609	-0.1269
-0.73333	-0.1095	0.014	-0.149	-0.2916	-0.4648	-0.5382	-0.3005	-0.3767	-0.2525	-0.1238	-0.2761	-0.4862	-0.3632	-0.2152	-0.3027	-0.3261	-0.252	-0.279	-0.3023	-0.2028	-0.493	-0.3646	-0.355	-0.3314	-0.3307	-0.3881	-0.3922	-0.4527	-0.2673	-0.3764	-0.0878	-0.1373	-0.3117	-0.0478	-0.345	-0.0475	-0.2791	-0.4342	-0.4173	-0.2565	-0.2563	-0.2081	-0.1765	-0.3324	-0.2986	-0.3813	-0.3376	-0.1565	-0.1296
-0.7	-0.1119	0.0147	-0.1426	-0.2985	-0.4563	-0.544	-0.2935	-0.3746	-0.2576	-0.1269	-0.2782	-0.4865	-0.3638	-0.2176	-0.3055	-0.334	-0.2537	-0.2768	-0.3031	-0.2047	-0.482	-0.3571	-0.3668	-0.3249	-0.3284	-0.3897	-0.3551	-0.449	-0.2664	-0.3712	-0.0843	-0.142	-0.3127	-0.049	-0.3476	-0.0597	-0.2823	-0.439	-0.4142	-0.2558	-0.2527	-0.2116	-0.1776	-0.3338	-0.2971	-0.372	-0.3342	-0.1503	-0.1267
-0.66667	-0.1117	0.0094	-0.1489	-0.3039	-0.442	-0.5479	-0.2746	-0.3709	-0.2615	-0.1314	-0.287	-0.4844	-0.3681	-0.2201	-0.3131	-0.3416	-0.2521	-0.2769	-0.3279	-0.2051	-0.474	-0.3483	-0.3738	-0.3264	-0.3292	-0.391	-0.3561	-0.4472	-0.2629	-0.3687	-0.0805	-0.1467	-0.3151	-0.0507	-0.3509	-0.0686	-0.2868	-0.4421	-0.4141	-0.2612	-0.2517	-0.2258	-0.1758	-0.3363	-0.2989	-0.3669	-0.3326	-0.1455	-0.1201
-0.63333	-0.1143	0.0073	-0.1329	-0.3091	-0.4378	-0.5463	-0.2674	-0.3648	-0.2666	-0.1414	-0.2961	-0.4805	-0.3739	-0.2211	-0.3197	-0.3411	-0.249	-0.2654	-0.362	-0.2095	-0.4667	-0.3473	-0.374	-0.3286	-0.3304	-0.3938	-0.3561	-0.4422	-0.2581	-0.3645	-0.0765	-0.1457	-0.314	-0.0478	-0.352	-0.0771	-0.2913	-0.4455	-0.4102	-0.2672	-0.2539	-0.2451	-0.1735	-0.3419	-0.301	-0.3574	-0.33	-0.1485	-0.1202
-0.6	-0.1161	0.0115	-0.1158	-0.3129	-0.4278	-0.545	-0.2722	-0.3548	-0.2695	-0.1478	-0.3063	-0.4805	-0.3762	-0.2279	-0.324	-0.3434	-0.2483	-0.2542	-0.3695	-0.223	-0.4634	-0.3531	-0.3759	-0.3302	-0.3288	-0.3962	-0.3431	-0.4358	-0.2552	-0.3584	-0.0756	-0.1435	-0.3145	-0.0444	-0.352	-0.0811	-0.2946	-0.4482	-0.4052	-0.2721	-0.2519	-0.2605	-0.1684	-0.3324	-0.2992	-0.3441	-0.3273	-0.1485	-0.1157
-0.56667	-0.1184	0.0168	-0.1249	-0.3113	-0.4196	-0.5446	-0.2494	-0.35	-0.2728	-0.1492	-0.3159	-0.4803	-0.3766	-0.2338	-0.3323	-0.3391	-0.2409	-0.2447	-0.3649	-0.2474	-0.4532	-0.3563	-0.3705	-0.3299	-0.3286	-0.3986	-0.3327	-0.425	-0.248	-0.3529	-0.0762	-0.141	-0.3143	-0.0437	-0.3554	-0.0817	-0.2974	-0.448	-0.3937	-0.2752	-0.2492	-0.2797	-0.1676	-0.3345	-0.2966	-0.3278	-0.324	-0.1441	-0.1082
-0.53333	-0.1249	0.0173	-0.1538	-0.3103	-0.4181	-0.544	-0.2309	-0.3419	-0.2718	-0.152	-0.32	-0.4833	-0.3744	-0.233	-0.332	-0.3492	-0.2321	-0.2384	-0.3834	-0.2614	-0.4473	-0.3605	-0.356	-0.3348	-0.3283	-0.3956	-0.3224	-0.4129	-0.2436	-0.3463	-0.0767	-0.139	-0.3149	-0.0422	-0.3554	-0.0795	-0.2973	-0.4433	-0.3812	-0.28	-0.2481	-0.2934	-0.1713	-0.3289	-0.2972	-0.3137	-0.3229	-0.1379	-0.0967
-0.5	-0.1312	0.0184	-0.1698	-0.3073	-0.407	-0.5419	-0.2235	-0.3328	-0.2643	-0.1517	-0.3185	-0.4905	-0.3728	-0.2269	-0.3254	-0.3493	-0.2223	-0.2318	-0.3876	-0.2734	-0.4359	-0.3705	-0.3392	-0.3398	-0.3296	-0.3954	-0.3119	-0.4033	-0.2349	-0.3333	-0.0733	-0.1339	-0.3168	-0.0422	-0.3548	-0.0733	-0.2952	-0.4427	-0.3702	-0.2921	-0.2491	-0.3095	-0.1788	-0.3231	-0.2965	-0.2981	-0.3223	-0.1394	-0.0867
-0.46667	-0.1406	0.0217	-0.1755	-0.3036	-0.3939	-0.5367	-0.2286	-0.3203	-0.2587	-0.152	-0.3202	-0.497	-0.3785	-0.2166	-0.3211	-0.3478	-0.2098	-0.2272	-0.3921	-0.2644	-0.4251	-0.3768	-0.3375	-0.3427	-0.3389	-0.4037	-0.3052	-0.402	-0.2311	-0.3223	-0.0695	-0.1242	-0.3159	-0.0402	-0.3532	-0.0663	-0.2974	-0.4419	-0.3605	-0.2978	-0.2499	-0.3229	-0.1819	-0.3229	-0.2953	-0.2782	-0.3205	-0.1441	-0.0867
-0.43333	-0.1453	0.0297	-0.1851	-0.2966	-0.3759	-0.538	-0.2146	-0.3089	-0.2575	-0.149	-0.3244	-0.5036	-0.3687	-0.2051	-0.318	-0.3514	-0.1936	-0.2219	-0.4044	-0.2649	-0.4123	-0.3859	-0.3458	-0.3392	-0.3409	-0.4127	-0.2913	-0.4006	-0.2326	-0.3136	-0.0647	-0.1232	-0.3141	-0.039	-0.3543	-0.0606	-0.2983	-0.4408	-0.3525	-0.2973	-0.2473	-0.3334	-0.1858	-0.3109	-0.2968	-0.2674	-0.3161	-0.1458	-0.0873
-0.4	-0.1464	0.0327	-0.195	-0.2959	-0.3647	-0.5365	-0.1944	-0.2891	-0.2551	-0.1529	-0.3266	-0.5081	-0.3619	-0.1984	-0.3138	-0.3528	-0.183	-0.2162	-0.4065	-0.2702	-0.4047	-0.3976	-0.3398	-0.3448	-0.3437	-0.4179	-0.2918	-0.4095	-0.238	-0.297	-0.0569	-0.1203	-0.3143	-0.0411	-0.355	-0.0634	-0.2994	-0.4394	-0.3481	-0.3002	-0.2494	-0.3369	-0.1898	-0.3059	-0.2953	-0.2656	-0.3099	-0.1478	-0.0878
-0.36667	-0.1501	0.0286	-0.2051	-0.2953	-0.3579	-0.5369	-0.192	-0.2869	-0.2537	-0.1587	-0.3309	-0.5178	-0.3581	-0.1965	-0.3137	-0.3536	-0.1627	-0.2056	-0.3995	-0.2771	-0.402	-0.4072	-0.3377	-0.3472	-0.3437	-0.4203	-0.3	-0.4219	-0.2613	-0.2904	-0.05	-0.1157	-0.3133	-0.0414	-0.3552	-0.0638	-0.2994	-0.4351	-0.3416	-0.3142	-0.2477	-0.3443	-0.1921	-0.3133	-0.2951	-0.2676	-0.3041	-0.1496	-0.0831
-0.33333	-0.1528	0.0281	-0.2048	-0.2976	-0.359	-0.5311	-0.1888	-0.2804	-0.251	-0.1649	-0.3314	-0.5223	-0.3556	-0.1974	-0.3155	-0.3529	-0.1565	-0.1982	-0.3987	-0.2824	-0.4014	-0.4416	-0.3339	-0.344	-0.3433	-0.416	-0.2882	-0.4328	-0.2682	-0.2809	-0.0471	-0.1234	-0.3172	-0.0373	-0.3538	-0.062	-0.3004	-0.4349	-0.3353	-0.3232	-0.247	-0.3441	-0.1899	-0.3118	-0.2906	-0.268	-0.2992	-0.139	-0.0816
-0.3	-0.1492	0.0246	-0.2027	-0.3008	-0.3626	-0.5197	-0.1808	-0.277	-0.2465	-0.1656	-0.3378	-0.5281	-0.3512	-0.2054	-0.317	-0.3547	-0.1523	-0.1998	-0.4255	-0.2789	-0.4012	-0.4484	-0.3243	-0.3428	-0.3438	-0.4135	-0.2803	-0.4459	-0.2923	-0.2695	-0.0407	-0.1217	-0.3245	-0.0309	-0.3531	-0.0603	-0.2985	-0.4356	-0.3274	-0.3354	-0.2509	-0.3427	-0.1915	-0.3205	-0.2913	-0.2692	-0.298	-0.1276	-0.0846
-0.26667	-0.1429	0.0236	-0.2032	-0.3027	-0.3654	-0.52	-0.1807	-0.2807	-0.2405	-0.1669	-0.3457	-0.5302	-0.3442	-0.2144	-0.3201	-0.3532	-0.1735	-0.1916	-0.4272	-0.2777	-0.3898	-0.4469	-0.3135	-0.3387	-0.3396	-0.4107	-0.2854	-0.4492	-0.3256	-0.2539	-0.0343	-0.1225	-0.3378	-0.0242	-0.3484	-0.0554	-0.297	-0.4308	-0.3231	-0.3494	-0.2513	-0.3366	-0.1916	-0.3326	-0.2926	-0.2697	-0.2949	-0.1314	-0.0883
-0.23333	-0.143	0.0228	-0.1966	-0.3064	-0.3634	-0.5217	-0.1804	-0.2871	-0.2351	-0.1677	-0.3548	-0.5316	-0.3375	-0.2124	-0.3255	-0.3537	-0.1903	-0.1858	-0.4248	-0.2722	-0.3867	-0.4499	-0.2869	-0.3391	-0.3404	-0.4094	-0.2904	-0.4434	-0.3266	-0.2509	-0.0286	-0.1282	-0.3422	-0.014	-0.3456	-0.053	-0.2961	-0.435	-0.316	-0.36	-0.2521	-0.3277	-0.194	-0.3426	-0.2928	-0.2685	-0.294	-0.1328	-0.0882
-0.2	-0.1428	0.012	-0.1884	-0.3075	-0.3611	-0.5238	-0.1784	-0.2888	-0.2307	-0.1722	-0.3629	-0.5258	-0.3282	-0.2051	-0.3325	-0.3538	-0.1998	-0.1845	-0.4263	-0.2713	-0.3766	-0.4441	-0.278	-0.3398	-0.3421	-0.4072	-0.2929	-0.4419	-0.3355	-0.2437	-0.0232	-0.131	-0.3475	-0.0091	-0.342	-0.0524	-0.2903	-0.4382	-0.3121	-0.3617	-0.2551	-0.3179	-0.1997	-0.343	-0.291	-0.273	-0.2897	-0.1268	-0.0916
-0.16667	-0.1456	0.003	-0.1624	-0.3051	-0.3615	-0.5226	-0.1822	-0.2928	-0.2368	-0.1757	-0.3654	-0.5225	-0.3286	-0.1916	-0.3363	-0.3544	-0.2081	-0.1811	-0.4251	-0.2588	-0.3685	-0.4366	-0.2713	-0.3379	-0.3415	-0.4046	-0.3021	-0.4418	-0.3262	-0.2328	-0.0238	-0.1261	-0.3542	-0.0027	-0.3357	-0.0499	-0.2829	-0.4409	-0.3135	-0.3656	-0.2536	-0.3076	-0.2085	-0.3526	-0.2861	-0.2717	-0.2861	-0.126	-0.09
-0.13333	-0.1447	-0.0066	-0.1372	-0.3017	-0.3619	-0.5179	-0.1817	-0.2929	-0.2375	-0.1792	-0.3593	-0.5269	-0.3307	-0.1912	-0.3348	-0.3545	-0.2182	-0.1773	-0.4199	-0.2533	-0.3615	-0.4249	-0.2726	-0.339	-0.3428	-0.4023	-0.3036	-0.4452	-0.3236	-0.2163	-0.0265	-0.1264	-0.3545	-0.0042	-0.3348	-0.0501	-0.2807	-0.4411	-0.3157	-0.3658	-0.2589	-0.2993	-0.2231	-0.3507	-0.2844	-0.2719	-0.2816	-0.1269	-0.0891
-0.1	-0.1447	-0.0112	-0.1143	-0.2959	-0.3715	-0.5152	-0.1781	-0.2942	-0.2363	-0.1782	-0.3526	-0.527	-0.3362	-0.1897	-0.3347	-0.3502	-0.2257	-0.1723	-0.4258	-0.2545	-0.3516	-0.4123	-0.273	-0.3298	-0.3445	-0.3982	-0.31	-0.4469	-0.3306	-0.1883	-0.0251	-0.1252	-0.3594	-0.01	-0.3285	-0.0497	-0.2759	-0.4408	-0.3163	-0.3427	-0.266	-0.3016	-0.2245	-0.3507	-0.2851	-0.2684	-0.2781	-0.1261	-0.0943
-0.06667	-0.138	-0.0163	-0.1118	-0.2903	-0.3807	-0.5114	-0.1788	-0.2994	-0.233	-0.1778	-0.345	-0.5139	-0.3359	-0.1922	-0.3333	-0.3488	-0.2351	-0.1677	-0.434	-0.2558	-0.3466	-0.4083	-0.2705	-0.3348	-0.3471	-0.3989	-0.3407	-0.446	-0.3274	-0.1664	-0.0221	-0.1261	-0.3621	-0.0137	-0.3223	-0.0477	-0.2756	-0.4387	-0.3161	-0.3604	-0.277	-0.2919	-0.2294	-0.3547	-0.2852	-0.2557	-0.275	-0.1264	-0.0985
-0.03333	-0.1188	-0.0172	-0.0966	-0.2829	-0.3935	-0.5049	-0.1351	-0.3005	-0.2292	-0.1767	-0.3362	-0.5169	-0.335	-0.1955	-0.3261	-0.347	-0.2373	-0.1603	-0.4488	-0.2396	-0.3471	-0.4042	-0.2685	-0.3393	-0.346	-0.3993	-0.336	-0.4414	-0.3321	-0.1487	-0.0178	-0.1227	-0.3619	-0.0113	-0.3159	-0.0493	-0.2729	-0.4377	-0.3176	-0.3386	-0.2905	-0.295	-0.2291	-0.3577	-0.2825	-0.2432	-0.2715	-0.1304	-0.1022
0	-0.1132	-0.012	-0.0983	-0.2937	-0.4069	-0.5336	-0.0851	-0.2519	-0.2375	-0.1747	-0.2919	-0.5119	-0.3171	-0.1928	-0.3427	-0.3382	-0.2343	-0.1548	-0.4433	-0.23	-0.3651	-0.3361	-0.2689	-0.3434	-0.3212	-0.4032	-0.3394	-0.4308	-0.3322	-0.1409	-0.0171	-0.1095	-0.3619	-0.005	-0.3109	-0.0485	-0.2672	-0.4369	-0.3173	-0.3125	-0.3019	-0.2771	-0.2275	-0.3607	-0.2764	-0.2289	-0.27	-0.144	-0.1073
0.03333	-0.0911	0.0402	-0.0999	-0.2189	-0.3741	-0.485	-0.0856	-0.26	-0.2243	-0.141	-0.1833	-0.4081	-0.2089	-0.1316	-0.3334	-0.328	-0.2037	-0.147	-0.4153	-0.2169	-0.3898	-0.2944	-0.2489	-0.3271	-0.264	-0.3821	-0.333	-0.4497	-0.3308	-0.1945	-0.019	-0.1122	-0.3614	0.0022	-0.3076	-0.0137	-0.2672	-0.4372	-0.3132	-0.2841	-0.303	-0.2914	-0.23	-0.3703	-0.2722	-0.2157	-0.2711	-0.1297	-0.1056
0.06667	-0.0385	0.0811	-0.1145	-0.1696	-0.3341	-0.4465	-0.0471	-0.2857	-0.1954	-0.096	-0.0588	-0.2758	-0.0803	-0.0082	-0.3039	-0.3012	-0.1605	-0.1253	-0.3607	-0.2267	-0.3716	-0.2571	-0.2304	-0.2783	-0.2086	-0.3165	-0.3259	-0.4318	-0.3322	-0.1289	-0.0152	-0.1332	-0.3639	-0.006	-0.3081	-0.0019	-0.2626	-0.4283	-0.2978	-0.2732	-0.3347	-0.2101	-0.234	-0.3778	-0.2664	-0.1878	-0.271	-0.1215	-0.0974
0.1	0.013	0.0993	-0.1551	-0.121	-0.2966	-0.4065	-0.0088	-0.2815	-0.1582	-0.0502	0.075	-0.1059	0.0421	0.1314	-0.2726	-0.263	-0.1196	-0.1	-0.3038	-0.2497	-0.3424	-0.2303	-0.2333	-0.2211	-0.1578	-0.2472	-0.3211	-0.3503	-0.3187	-0.0985	0.0471	-0.1061	-0.3732	0.044	-0.2973	0.002	-0.2412	-0.4332	-0.2484	-0.2223	-0.2842	-0.159	-0.24	-0.3681	-0.2646	-0.1533	-0.2712	-0.0693	-0.0724
0.13333	0.0511	0.1347	-0.1935	-0.049	-0.2676	-0.3811	0.0096	-0.2715	-0.1267	-0.0225	0.188	0.0249	0.1508	0.2687	-0.2415	-0.2324	-0.091	-0.0837	-0.2433	-0.2407	-0.3009	-0.2137	-0.233	-0.1838	-0.1113	-0.2033	-0.2897	-0.2441	-0.3355	-0.0676	0.0771	-0.0873	-0.3557	0.0919	-0.2776	-0.0006	-0.2234	-0.4227	-0.2545	-0.1931	-0.3013	-0.1223	-0.2298	-0.3455	-0.2679	-0.1275	-0.2664	-0.0516	-0.0406
0.16667	0.0901	0.151	-0.2047	-0.0344	-0.2507	-0.3595	0.0328	-0.2575	-0.0978	0.0061	0.2799	0.1471	0.2466	0.376	-0.2172	-0.2037	-0.0798	-0.0713	-0.1915	-0.2264	-0.2593	-0.1943	-0.2261	-0.1476	-0.0759	-0.1823	-0.3171	-0.1982	-0.3735	-0.0541	0.116	-0.0501	-0.2688	0.1298	-0.2692	0.0015	-0.2037	-0.4179	-0.2404	-0.2086	-0.2918	-0.0822	-0.1941	-0.3121	-0.267	-0.1138	-0.2448	-0.0254	0.0266
0.2	0.1101	0.1547	-0.2136	-0.0345	-0.2524	-0.3478	0.0465	-0.243	-0.0639	0.0339	0.3344	0.2221	0.3224	0.4474	-0.2081	-0.1862	-0.0773	-0.0576	-0.1658	-0.2056	-0.2169	-0.1793	-0.2194	-0.1103	-0.0466	-0.1605	-0.2996	-0.1678	-0.3004	-0.0216	0.1306	-0.0194	-0.2155	0.1552	-0.2597	0.0096	-0.1853	-0.414	-0.2442	-0.2262	-0.3142	-0.074	-0.127	-0.2832	-0.2562	-0.103	-0.2113	-0.0168	0.0791
0.23333	0.1252	0.1569	-0.2136	-0.0584	-0.2436	-0.3412	0.0561	-0.218	-0.0431	0.062	0.3826	0.2758	0.3663	0.4994	-0.2031	-0.176	-0.0679	-0.0527	-0.1446	-0.1968	-0.1822	-0.1596	-0.2119	-0.0781	-0.0196	-0.1522	-0.3091	-0.1596	-0.258	-0.0145	0.1438	-0.0033	-0.1383	0.17	-0.2548	0.0094	-0.1714	-0.4085	-0.2456	-0.2349	-0.3174	-0.0568	-0.0744	-0.2627	-0.2391	-0.098	-0.177	-0.0044	0.1197
0.26667	0.1347	0.1871	-0.2132	-0.0729	-0.241	-0.325	0.0446	-0.1935	-0.0332	0.0877	0.4189	0.31	0.4181	0.5364	-0.1989	-0.1589	-0.0669	-0.053	-0.1303	-0.1952	-0.1457	-0.1376	-0.2109	-0.0448	0.0034	-0.1584	-0.3181	-0.1469	-0.1911	-0.031	0.1472	0.0025	-0.1078	0.1856	-0.2476	0.0151	-0.1592	-0.4015	-0.2395	-0.2467	-0.3123	-0.0471	-0.0436	-0.2447	-0.2237	-0.1025	-0.1411	0.0113	0.1453
0.3	0.148	0.1679	-0.2199	-0.0798	-0.231	-0.3041	0.0468	-0.1687	-0.0004	0.1049	0.4523	0.3214	0.4557	0.5678	-0.1863	-0.1491	-0.07	-0.0466	-0.1252	-0.1762	-0.1082	-0.1245	-0.1919	-0.0174	0.0302	-0.1314	-0.3237	-0.153	-0.1411	-0.0409	0.1292	0.019	-0.087	0.1991	-0.2512	0.0238	-0.1533	-0.39	-0.2371	-0.2512	-0.3158	-0.0196	-0.0283	-0.2231	-0.2209	-0.1017	-0.1126	0.025	0.1579
0.33333	0.1481	0.1732	-0.2073	-0.0843	-0.2366	-0.2854	0.057	-0.1519	0.0206	0.1188	0.4881	0.3462	0.4926	0.5908	-0.172	-0.1434	-0.0716	-0.0326	-0.1047	-0.1446	-0.0802	-0.1095	-0.1724	-0.0037	0.0522	-0.1174	-0.3365	-0.1538	-0.1146	-0.0322	0.129	0.0226	-0.0646	0.2112	-0.2321	0.0292	-0.1466	-0.3772	-0.2385	-0.2389	-0.3169	-0.0154	-0.0304	-0.1956	-0.2207	-0.0977	-0.0964	0.0386	0.1601
0.36667	0.1445	0.1841	-0.1961	-0.0943	-0.2329	-0.2574	0.0727	-0.1364	0.0509	0.1274	0.518	0.3728	0.5236	0.6053	-0.1622	-0.1385	-0.074	-0.0182	-0.0936	-0.0961	-0.0521	-0.0949	-0.1581	0.0325	0.0771	-0.1093	-0.3385	-0.1496	-0.0803	0.0284	0.1134	0.0457	-0.061	0.2194	-0.224	0.0366	-0.1441	-0.3667	-0.2423	-0.2309	-0.292	-0.0004	-0.0459	-0.1726	-0.2178	-0.0955	-0.083	0.0451	0.1786
0.4	0.1777	0.1925	-0.195	-0.1005	-0.2195	-0.2369	0.0966	-0.1174	0.0728	0.1376	0.5357	0.3966	0.555	0.6122	-0.1676	-0.1301	-0.0643	-0.0068	-0.0796	-0.038	-0.0302	-0.0759	-0.1375	0.0642	0.0913	-0.1013	-0.3536	-0.1426	-0.0292	0.045	0.1001	0.0658	-0.0577	0.2295	-0.2204	0.0502	-0.1361	-0.3492	-0.2568	-0.2174	-0.2949	0.0052	-0.0308	-0.1553	-0.2208	-0.0861	-0.0713	0.048	0.1959
0.43333	0.2153	0.2122	-0.1865	-0.0938	-0.2056	-0.234	0.1139	-0.0911	0.0938	0.1486	0.5527	0.4224	0.5698	0.6202	-0.167	-0.123	-0.0431	0.0033	-0.0746	0.0223	-0.0104	-0.0505	-0.1245	0.0921	0.1098	-0.0751	-0.3618	-0.1439	0.0025	0.1034	0.0971	0.0863	-0.0392	0.2375	-0.214	0.0695	-0.1363	-0.3348	-0.2658	-0.2076	-0.3002	0.0097	-0.0341	-0.1436	-0.2186	-0.0738	-0.0678	0.0478	0.2236
0.46667	0.2173	0.2247	-0.1551	-0.0984	-0.1935	-0.2257	0.1244	-0.0708	0.1132	0.1597	0.5485	0.446	0.5712	0.6244	-0.1539	-0.1147	-0.0292	0.0203	-0.0655	0.067	0.004	-0.025	-0.1194	0.1043	0.1271	-0.0577	-0.3671	-0.1401	0.0165	0.1418	0.0916	0.112	-0.0056	0.2444	-0.2118	0.0759	-0.1327	-0.3232	-0.279	-0.1913	-0.3178	0.0123	-0.0327	-0.1475	-0.2116	-0.0673	-0.0658	0.0497	0.2489
0.5	0.2485	0.2242	-0.1303	-0.1065	-0.1805	-0.1928	0.1402	-0.0482	0.1273	0.1615	0.5512	0.4622	0.5758	0.6288	-0.1234	-0.114	-0.0139	0.0428	-0.0616	0.0862	0.0207	0.0013	-0.1009	0.0994	0.1496	-0.0355	-0.3695	-0.1215	0.0203	0.154	0.086	0.1413	0.0391	0.259	-0.2096	0.0724	-0.1305	-0.3134	-0.269	-0.1651	-0.3329	0.017	-0.0154	-0.1457	-0.2116	-0.0451	-0.0658	0.054	0.2726
0.53333	0.2557	0.2183	-0.1278	-0.1253	-0.1681	-0.1791	0.1459	-0.0224	0.1383	0.1616	0.5434	0.4659	0.5871	0.6409	-0.1103	-0.1116	0.0019	0.0517	-0.0631	0.0974	0.0426	0.0282	-0.0617	0.0947	0.1694	-0.0248	-0.3774	-0.1139	0.0184	0.1591	0.0988	0.1546	0.0693	0.2651	-0.2073	0.0766	-0.1269	-0.3102	-0.2658	-0.119	-0.3515	0.0222	-0.0176	-0.139	-0.2137	-0.0448	-0.0628	0.0681	0.297
0.56667	0.2633	0.216	-0.1316	-0.1307	-0.1594	-0.1746	0.1423	0.0109	0.1464	0.1627	0.5383	0.4774	0.59	0.6466	-0.0947	-0.1127	0.0197	0.073	-0.076	0.103	0.0693	0.0508	-0.0352	0.1008	0.1831	-0.0151	-0.3676	-0.1128	0.0298	0.1715	0.1087	0.1614	0.0829	0.2619	-0.1963	0.0807	-0.1221	-0.3069	-0.2738	-0.0973	-0.3423	0.0261	0.0025	-0.125	-0.2184	-0.0398	-0.061	0.0808	0.3127
0.6	0.2719	0.2149	-0.1187	-0.1322	-0.1397	-0.1675	0.1297	0.0537	0.1562	0.1676	0.5351	0.484	0.5954	0.6571	-0.0893	-0.1152	0.026	0.0842	-0.0848	0.1109	0.0852	0.0775	-0.0213	0.1136	0.1907	-0.0098	-0.3676	-0.1198	0.0437	0.1879	0.1198	0.1594	0.1008	0.2623	-0.1857	0.076	-0.1119	-0.2979	-0.269	-0.0828	-0.3293	0.0385	0.0445	-0.1154	-0.2189	-0.0347	-0.0521	0.0858	0.3113
0.63333	0.2782	0.2025	-0.0971	-0.1289	-0.1149	-0.1559	0.1167	0.0921	0.1618	0.1753	0.5411	0.4791	0.5958	0.6584	-0.0948	-0.1088	0.0274	0.1048	-0.0731	0.1182	0.0761	0.1054	0.01	0.1294	0.196	0.0052	-0.3553	-0.1251	0.0668	0.2059	0.1307	0.1589	0.115	0.2628	-0.1722	0.0874	-0.0984	-0.2874	-0.279	-0.0686	-0.315	0.0309	0.0768	-0.0895	-0.2108	-0.0241	-0.0427	0.0949	0.3278
0.66667	0.2835	0.192	-0.0709	-0.1121	-0.0963	-0.1372	0.1204	0.1409	0.1764	0.182	0.5382	0.4825	0.5916	0.6598	-0.0926	-0.0982	0.0282	0.1244	-0.0786	0.1387	0.0708	0.1124	0.0706	0.1472	0.208	0.0056	-0.3455	-0.1215	0.0858	0.2309	0.1317	0.1565	0.1392	0.2736	-0.1575	0.0823	-0.0852	-0.2772	-0.2714	-0.0453	-0.294	0.0258	0.1148	-0.0544	-0.1995	-0.0148	-0.0218	0.1148	0.3407
0.7	0.2906	0.1985	-0.0652	-0.0877	-0.0868	-0.1227	0.133	0.1966	0.1876	0.1904	0.5639	0.477	0.5904	0.6864	-0.0809	-0.0914	0.0316	0.1351	-0.0768	0.1469	0.0669	0.1203	0.1429	0.1578	0.2223	-0.0031	-0.3325	-0.1191	0.0968	0.2384	0.1317	0.1658	0.1568	0.2866	-0.1434	0.088	-0.075	-0.2658	-0.2623	-0.0306	-0.2748	0.0119	0.1532	-0.0159	-0.1809	-0.0122	-0.008	0.1237	0.3507
0.73333	0.2945	0.1854	-0.0631	-0.0731	-0.0699	-0.1105	0.1343	0.2351	0.2007	0.1969	0.5787	0.4823	0.5899	0.6951	-0.0719	-0.0818	0.0299	0.1429	-0.0917	0.1606	0.062	0.1201	0.1922	0.1543	0.2321	-0.0023	-0.3233	-0.1151	0.1001	0.2688	0.1322	0.1782	0.1715	0.2841	-0.1313	0.1019	-0.0565	-0.2534	-0.2441	-0.0045	-0.2379	-0.0077	0.1634	0.0239	-0.1549	-0.0146	-0.004	0.1276	0.3649
0.76667	0.2946	0.1955	-0.0486	-0.0643	-0.0255	-0.1046	0.1443	0.2646	0.2026	0.2111	0.5775	0.4842	0.5821	0.7047	-0.0635	-0.0678	0.0439	0.1498	-0.1036	0.1838	0.0664	0.1301	0.2067	0.1459	0.2339	0.004	-0.3135	-0.1125	0.0961	0.3051	0.1334	0.1952	0.1903	0.2772	-0.1236	0.12	-0.0434	-0.2442	-0.2304	0.0291	-0.208	-0.0106	0.1622	0.0686	-0.1356	-0.0162	0.0032	0.1437	0.3788
0.8	0.2825	0.2124	-0.0304	-0.0637	0.0118	-0.0954	0.1609	0.2834	0.2064	0.2224	0.5811	0.4863	0.5884	0.7003	-0.0623	-0.0568	0.0649	0.1619	-0.1049	0.1948	0.0681	0.1471	0.1999	0.1245	0.2312	0.0174	-0.3007	-0.1024	0.0892	0.3221	0.1322	0.2147	0.2028	0.271	-0.105	0.1347	-0.0273	-0.2312	-0.2152	0.0306	-0.1701	0.0046	0.1566	0.0982	-0.1189	-0.0174	0.0112	0.1441	0.3838
0.83333	0.273	0.2205	-0.0047	-0.0676	0.0477	-0.0864	0.1683	0.2905	0.203	0.229	0.58	0.4893	0.5924	0.708	-0.0586	-0.041	0.0933	0.1809	-0.0962	0.1882	0.0835	0.1633	0.1911	0.1103	0.2413	0.0544	-0.2739	-0.0982	0.0721	0.3291	0.1477	0.2245	0.2133	0.273	-0.0853	0.1487	-0.0142	-0.2152	-0.1999	0.0266	-0.1282	0.0234	0.1466	0.1191	-0.1096	-0.0133	0.0198	0.1452	0.3767
0.86667	0.2709	0.2264	0.0086	-0.0748	0.0765	-0.0638	0.1725	0.3016	0.1996	0.2308	0.5831	0.4786	0.5963	0.7038	-0.0549	-0.0289	0.105	0.1903	-0.0737	0.1806	0.0938	0.1729	0.2004	0.0962	0.2548	0.0923	-0.2404	-0.0991	0.0663	0.3158	0.1612	0.2323	0.2342	0.2769	-0.0687	0.1611	-0.0013	-0.1999	-0.1764	0.0693	-0.1033	0.0293	0.1422	0.1203	-0.1075	0.0003	0.0232	0.1464	0.3681
0.9	0.2713	0.2296	0.0153	-0.0774	0.1045	-0.0504	0.1805	0.3199	0.2008	0.2452	0.5784	0.469	0.5987	0.706	-0.0464	-0.0218	0.1129	0.1974	-0.0443	0.1739	0.1101	0.1777	0.2184	0.0852	0.261	0.1101	-0.2201	-0.0897	0.067	0.291	0.1707	0.2287	0.2561	0.2712	-0.0451	0.1706	0.0121	-0.1786	-0.1551	0.101	-0.0774	0.0254	0.153	0.1139	-0.1029	0.0179	0.0315	0.1419	0.3657
0.93333	0.2693	0.2449	0.0315	-0.0767	0.1408	-0.0464	0.1924	0.3256	0.2047	0.256	0.5587	0.4567	0.599	0.7032	-0.0389	-0.0165	0.11	0.1996	-0.0263	0.1716	0.1281	0.189	0.2205	0.0732	0.2669	0.1223	-0.2078	-0.0824	0.0726	0.2989	0.1701	0.2298	0.2568	0.2643	-0.0224	0.1814	0.0219	-0.1669	-0.1418	0.1209	-0.0648	0.0233	0.1604	0.1282	-0.0903	0.0203	0.0575	0.1489	0.3519
0.96667	0.2607	0.2552	0.0414	-0.0833	0.1851	-0.0431	0.2114	0.337	0.2095	0.2682	0.5602	0.4564	0.6068	0.6928	-0.0275	-0.0083	0.1152	0.2033	-0.008	0.1643	0.145	0.1997	0.2289	0.0735	0.2653	0.1294	-0.1978	-0.064	0.0931	0.2982	0.1772	0.2364	0.27	0.2611	-0.0023	0.1945	0.0409	-0.1552	-0.1195	0.1346	-0.0538	0.022	0.1864	0.1343	-0.0806	0.027	0.0948	0.1608	0.337
1	0.2485	0.2625	0.0545	-0.0825	0.213	-0.0459	0.1751	0.3529	0.224	0.2802	0.5621	0.4634	0.6067	0.6963	-0.0184	-0.0051	0.1133	0.2119	0.027	0.1539	0.1593	0.209	0.2323	0.0712	0.2678	0.134	-0.1973	-0.0424	0.1407	0.2801	0.1794	0.2342	0.2831	0.2612	0.0175	0.2017	0.0566	-0.1427	-0.0933	0.1419	-0.0301	0.0123	0.2103	0.1385	-0.072	0.0316	0.1271	0.1638	0.3241
1.03333	0.2305	0.2632	0.0714	-0.0886	0.227	-0.0373	0.1687	0.3996	0.2396	0.2898	0.5677	0.4535	0.613	0.7074	-0.0051	-0.0051	0.1241	0.2239	0.0535	0.1494	0.1601	0.222	0.2615	0.0562	0.2813	0.1293	-0.1918	-0.0022	0.1621	0.2581	0.1871	0.2344	0.2898	0.2634	0.0356	0.2029	0.0701	-0.1296	-0.0767	0.1445	-0.0032	0.0054	0.2095	0.1448	-0.0637	0.0261	0.1448	0.1698	0.3167
1.06667	0.2073	0.2623	0.091	-0.0853	0.2359	-0.0299	0.1519	0.4206	0.2481	0.3094	0.5655	0.4502	0.6051	0.7088	0.0079	-0.007	0.1306	0.2329	0.0715	0.1392	0.1507	0.2314	0.29	0.0481	0.2926	0.1233	-0.1815	0.0204	0.1804	0.2388	0.1961	0.2261	0.3053	0.2678	0.0449	0.1956	0.0844	-0.1184	-0.0689	0.1554	0.0273	0.0041	0.1859	0.1559	-0.058	0.0232	0.1531	0.1781	0.3209
1.1	0.1835	0.2613	0.1048	-0.0743	0.2397	-0.0075	0.1413	0.4373	0.2553	0.32	0.5684	0.4407	0.5871	0.706	0.0209	-0.0075	0.1207	0.2321	0.1003	0.1336	0.1527	0.2259	0.3034	0.0513	0.3015	0.1261	-0.1536	0.0342	0.195	0.2262	0.2194	0.2194	0.3245	0.2679	0.0465	0.2003	0.0918	-0.1113	-0.0554	0.1488	0.0523	0.0041	0.1693	0.156	-0.0589	0.0196	0.1637	0.182	0.3208
1.13333	0.1648	0.2562	0.106	-0.0536	0.2415	0.0009	0.1434	0.4454	0.2566	0.3237	0.577	0.4263	0.592	0.6933	0.0426	0.0041	0.1193	0.2409	0.1364	0.126	0.1592	0.2236	0.3066	0.0644	0.2966	0.1316	-0.1357	0.0347	0.2341	0.2139	0.2327	0.2039	0.3299	0.2631	0.0503	0.1982	0.1007	-0.108	-0.0502	0.14	0.0805	0.0014	0.1485	0.1576	-0.0671	0.014	0.1784	0.1862	0.3317
1.16667	0.1565	0.2466	0.1057	-0.0292	0.2481	0.0135	0.1407	0.4392	0.2609	0.3346	0.5793	0.4276	0.5856	0.6899	0.063	0.0123	0.1213	0.2404	0.1761	0.11	0.1792	0.2411	0.3112	0.0643	0.3098	0.1373	-0.1215	0.0444	0.2717	0.207	0.2424	0.1944	0.331	0.2645	0.0568	0.2058	0.1076	-0.1005	-0.0423	0.1396	0.1058	0.008	0.1317	0.1692	-0.0749	0.0075	0.1927	0.1914	0.3455
1.2	0.1505	0.2403	0.1164	-0.022	0.2488	0.0291	0.1387	0.4329	0.2678	0.3448	0.5776	0.4265	0.5786	0.6828	0.0791	0.0175	0.124	0.2401	0.1954	0.0934	0.2031	0.2614	0.3204	0.0595	0.3158	0.138	-0.1121	0.0469	0.247	0.192	0.2442	0.2208	0.3339	0.2671	0.0638	0.2065	0.1129	-0.0948	-0.0215	0.1287	0.1126	0.0074	0.1105	0.1682	-0.0768	-0.0039	0.2167	0.1947	0.3652
1.23333	0.1312	0.2394	0.1371	-0.0152	0.2473	0.0522	0.1416	0.4296	0.2679	0.3493	0.5699	0.4124	0.5665	0.676	0.0972	0.0177	0.1316	0.2416	0.2257	0.0906	0.2165	0.264	0.3359	0.0543	0.3223	0.1475	-0.1006	0.0492	0.2972	0.1653	0.2574	0.2459	0.353	0.2734	0.0695	0.2042	0.1162	-0.0941	0.0026	0.1355	0.1057	0.0094	0.0907	0.1678	-0.0768	-0.002	0.2371	0.1992	0.3773
1.26667	0.1072	0.2444	0.1581	-0.0209	0.2616	0.0707	0.1431	0.4272	0.2703	0.3496	0.553	0.4125	0.561	0.6683	0.1037	0.0196	0.1351	0.227	0.2279	0.1073	0.2264	0.2829	0.3512	0.0587	0.3338	0.1662	-0.0935	0.0428	0.3208	0.1688	0.2681	0.2484	0.3621	0.2879	0.0806	0.2105	0.1177	-0.0947	0.0249	0.1533	0.102	0.0094	0.0622	0.1543	-0.0765	-0.0005	0.259	0.2008	0.3893
1.3	0.0897	0.2497	0.1672	-0.0252	0.2761	0.0912	0.1493	0.4311	0.2821	0.3612	0.5426	0.4088	0.5686	0.659	0.108	-0.0021	0.1556	0.2131	0.2263	0.1231	0.2262	0.3085	0.3579	0.0669	0.3416	0.1924	-0.0882	0.0648	0.3371	0.1911	0.2764	0.249	0.3642	0.3082	0.092	0.2174	0.1218	-0.0936	0.0479	0.1754	0.1016	0.0151	0.0445	0.1338	-0.0746	0.0178	0.285	0.2025	0.3911
1.33333	0.0815	0.2616	0.1764	-0.0318	0.2996	0.1154	0.1597	0.4326	0.2859	0.3738	0.5483	0.403	0.5853	0.6546	0.108	-0.0112	0.1655	0.2129	0.2329	0.1446	0.2251	0.3345	0.3617	0.0771	0.3368	0.211	-0.0812	0.0781	0.3546	0.2072	0.2849	0.2351	0.3651	0.3211	0.1029	0.2208	0.1188	-0.0933	0.0693	0.1872	0.1191	0.019	0.0268	0.1199	-0.068	0.0382	0.3117	0.2065	0.3877
1.36667	0.0767	0.265	0.188	-0.0423	0.3186	0.1317	0.1505	0.4309	0.2935	0.3949	0.5495	0.404	0.5806	0.6581	0.112	-0.0097	0.1683	0.2151	0.2392	0.1484	0.2215	0.3667	0.3644	0.0989	0.3323	0.2233	-0.0825	0.0978	0.3592	0.2037	0.2975	0.226	0.3741	0.3357	0.1067	0.2167	0.1154	-0.0978	0.09	0.2003	0.1209	0.0333	0.0202	0.1186	-0.0673	0.0574	0.3393	0.2083	0.3776
1.4	0.0786	0.2678	0.1937	-0.0528	0.3332	0.1362	0.1369	0.4393	0.2979	0.414	0.5329	0.4027	0.5808	0.6565	0.1052	-0.0117	0.165	0.217	0.232	0.1564	0.2162	0.3899	0.3729	0.1138	0.32	0.2275	-0.1063	0.1071	0.3477	0.1889	0.3052	0.2169	0.3811	0.3386	0.1072	0.2112	0.1157	-0.1005	0.1088	0.2129	0.1206	0.0293	0.0155	0.1197	-0.0746	0.0675	0.366	0.2193	0.3826
1.43333	0.0844	0.2706	0.2004	-0.0545	0.3316	0.1484	0.1326	0.4459	0.2967	0.4197	0.5329	0.3872	0.5858	0.6496	0.0968	-0.0133	0.1651	0.2184	0.2316	0.1762	0.224	0.406	0.3837	0.133	0.3029	0.2348	-0.1155	0.1171	0.3361	0.1892	0.3059	0.2199	0.3877	0.3486	0.1061	0.2122	0.1155	-0.1088	0.1183	0.2203	0.1174	0.03	0.0248	0.1163	-0.0788	0.0781	0.3877	0.2378	0.389
1.46667	0.1012	0.2722	0.198	-0.0281	0.323	0.1455	0.1328	0.4676	0.3017	0.414	0.5235	0.3734	0.5952	0.6431	0.0994	-0.0172	0.1652	0.2298	0.2371	0.2037	0.2236	0.42	0.3946	0.1439	0.2918	0.2395	-0.0943	0.1228	0.3193	0.1923	0.3085	0.234	0.3934	0.355	0.1119	0.2092	0.1148	-0.1133	0.1299	0.2203	0.112	0.0136	0.0382	0.1079	-0.0769	0.0841	0.3968	0.2511	0.3971
1.5	0.1113	0.2758	0.1984	-0.008	0.3079	0.1477	0.1381	0.4823	0.3132	0.4136	0.5303	0.3679	0.585	0.6351	0.1026	-0.0106	0.1675	0.2329	0.2336	0.2331	0.2165	0.4304	0.4164	0.1512	0.2856	0.2447	-0.06	0.1255	0.3113	0.2125	0.3132	0.2518	0.3926	0.3639	0.1177	0.2118	0.1094	-0.1228	0.1346	0.2239	0.104	0.0092	0.0567	0.1003	-0.0661	0.0848	0.4085	0.2638	0.3948
1.53333	0.1185	0.2794	0.2006	0.0304	0.2844	0.1426	0.1408	0.4937	0.3191	0.4079	0.5299	0.3575	0.5829	0.6211	0.1057	-0.01	0.1648	0.25	0.2321	0.2644	0.2012	0.4362	0.4133	0.1492	0.2663	0.2529	-0.0399	0.1317	0.3006	0.2247	0.3202	0.2452	0.3925	0.3665	0.116	0.2238	0.106	-0.1338	0.134	0.2222	0.0893	-0.0013	0.0685	0.083	-0.049	0.0826	0.4122	0.2791	0.3876
1.56667	0.1179	0.2794	0.208	0.053	0.2741	0.1428	0.1436	0.4988	0.3297	0.4094	0.5462	0.3601	0.5826	0.6223	0.1211	0.0037	0.1609	0.2652	0.2405	0.2837	0.1889	0.4445	0.4023	0.142	0.2379	0.2542	0.0087	0.1364	0.2963	0.2332	0.3294	0.2392	0.3977	0.3612	0.1205	0.2244	0.1062	-0.1441	0.1287	0.2203	0.07	0.0013	0.0671	0.0638	-0.0352	0.0796	0.4165	0.2943	0.3829
1.6	0.1163	0.2752	0.2245	0.0698	0.2554	0.1484	0.1441	0.5092	0.3341	0.4069	0.5611	0.3695	0.5748	0.597	0.1323	0.0237	0.1545	0.2872	0.2396	0.2929	0.1855	0.4519	0.3991	0.1381	0.2129	0.249	0.0121	0.1449	0.2877	0.2343	0.335	0.2441	0.4054	0.364	0.1259	0.2301	0.1062	-0.1458	0.1191	0.2148	0.0504	0.001	0.048	0.0561	-0.024	0.0778	0.425	0.3081	0.3878
1.63333	0.1143	0.27	0.2379	0.0769	0.2553	0.1626	0.1607	0.5011	0.3453	0.4107	0.565	0.3646	0.5694	0.6047	0.1303	0.0455	0.144	0.3015	0.2333	0.2894	0.1972	0.4511	0.4177	0.1444	0.1923	0.2421	0.0301	0.1472	0.2721	0.2392	0.3466	0.2385	0.4116	0.3634	0.1323	0.2261	0.1111	-0.1429	0.1079	0.2137	0.0385	0.0171	0.0164	0.0479	-0.0198	0.072	0.4344	0.337	0.3979
1.66667	0.1088	0.2626	0.2512	0.0804	0.267	0.1775	0.1803	0.4987	0.3463	0.4119	0.5701	0.3446	0.5663	0.6126	0.141	0.0571	0.1294	0.3085	0.2298	0.2677	0.2027	0.4601	0.441	0.1602	0.2019	0.2437	0.0428	0.1472	0.2687	0.2207	0.3543	0.2377	0.4196	0.3641	0.1323	0.2236	0.1178	-0.1385	0.1057	0.2198	0.0204	0.0256	-0.0156	0.0336	-0.0175	0.0686	0.4411	0.3745	0.399
1.7	0.1014	0.2424	0.2535	0.086	0.2655	0.187	0.1789	0.4941	0.3457	0.4119	0.5867	0.3345	0.5596	0.6099	0.1475	0.0623	0.1197	0.3236	0.2082	0.2515	0.213	0.4782	0.4514	0.1745	0.207	0.245	0.0616	0.1599	0.2628	0.2321	0.3564	0.2426	0.425	0.3723	0.1301	0.2153	0.12	-0.1276	0.101	0.2197	-0.002	0.028	-0.0383	0.0201	-0.0186	0.0692	0.4368	0.4252	0.4059
1.73333	0.1047	0.2404	0.2687	0.0892	0.2673	0.1919	0.1768	0.4825	0.3429	0.4146	0.6407	0.3242	0.5466	0.6052	0.1534	0.0533	0.1116	0.3264	0.2255	0.24	0.2202	0.4863	0.4547	0.1836	0.2135	0.2521	0.0654	0.1699	0.2485	0.2232	0.3594	0.2521	0.4282	0.3816	0.1274	0.2119	0.1279	-0.1249	0.0952	0.2205	-0.0097	0.039	-0.0623	0.0175	-0.0213	0.0706	0.4305	0.4672	0.4157
1.76667	0.1134	0.2451	0.2721	0.102	0.2639	0.2046	0.1653	0.4752	0.3333	0.4274	0.6493	0.3077	0.5437	0.6134	0.1647	0.0516	0.1139	0.3229	0.2483	0.2287	0.2065	0.4858	0.4511	0.1982	0.2193	0.2579	0.0567	0.1789	0.2357	0.2571	0.364	0.2548	0.439	0.388	0.1288	0.2055	0.1323	-0.1247	0.094	0.2263	-0.0112	0.0534	-0.0937	0.0209	-0.0231	0.0808	0.4298	0.5046	0.4193
1.8	0.1143	0.2528	0.2766	0.1182	0.2658	0.2125	0.1612	0.4722	0.3079	0.4355	0.647	0.2886	0.5414	0.6184	0.1815	0.0686	0.1034	0.3297	0.2689	0.2277	0.1931	0.4738	0.4604	0.2075	0.2281	0.2694	0.0631	0.1698	0.2356	0.2563	0.3677	0.2613	0.4403	0.3638	0.1301	0.1989	0.1331	-0.1252	0.0957	0.2355	-0.01	0.0611	-0.1247	0.0159	-0.0269	0.0843	0.4312	0.525	0.4215
1.83333	0.1158	0.2675	0.2931	0.1186	0.2635	0.2111	0.1544	0.4708	0.3086	0.4395	0.6424	0.2761	0.5333	0.6198	0.2037	0.0993	0.1008	0.3337	0.2557	0.238	0.1813	0.4661	0.4614	0.2247	0.2373	0.2852	0.0715	0.1526	0.236	0.2598	0.3736	0.2711	0.4421	0.3767	0.1341	0.1919	0.1343	-0.1264	0.0886	0.2504	-0.0101	0.0686	-0.1476	0.0075	-0.0277	0.0829	0.4328	0.534	0.4223
1.86667	0.1252	0.2754	0.3083	0.1109	0.2704	0.2136	0.1503	0.4651	0.303	0.4409	0.6332	0.2722	0.5256	0.6205	0.2204	0.1276	0.1016	0.3323	0.2355	0.239	0.1719	0.4522	0.4623	0.2336	0.2271	0.2944	0.0798	0.1396	0.235	0.2559	0.3771	0.2735	0.4447	0.3845	0.1391	0.1919	0.1313	-0.1199	0.0823	0.2578	-0.0091	0.0847	-0.1596	0.003	-0.0267	0.0827	0.4357	0.5346	0.4101
1.9	0.1349	0.272	0.3038	0.0925	0.2824	0.2158	0.1524	0.472	0.2955	0.4414	0.6353	0.2763	0.5168	0.6193	0.2301	0.1534	0.0853	0.3363	0.2182	0.2455	0.1798	0.4397	0.4742	0.2503	0.2211	0.3051	0.0856	0.1406	0.2327	0.2415	0.3779	0.2731	0.4439	0.3807	0.1441	0.1928	0.1299	-0.1118	0.0847	0.2643	-0.0094	0.099	-0.1627	-0.0052	-0.0328	0.0848	0.4419	0.5271	0.4051
1.93333	0.1428	0.2667	0.2925	0.0696	0.2911	0.2178	0.1481	0.458	0.291	0.4443	0.6283	0.2965	0.5148	0.6126	0.2305	0.1769	0.0791	0.3457	0.2016	0.2432	0.1798	0.4325	0.4786	0.2714	0.2166	0.3157	0.0944	0.1353	0.2347	0.2262	0.3768	0.2699	0.4483	0.3846	0.1471	0.1962	0.1302	-0.1043	0.0867	0.2795	-0.007	0.118	-0.1635	-0.0061	-0.0403	0.0903	0.45	0.519	0.392
1.96667	0.1466	0.265	0.2789	0.0405	0.2831	0.2248	0.1506	0.4555	0.2929	0.4495	0.6383	0.2979	0.5069	0.6226	0.2386	0.1945	0.0714	0.3469	0.188	0.2233	0.1957	0.4333	0.4812	0.2988	0.2177	0.329	0.0982	0.1532	0.2463	0.2089	0.3727	0.2678	0.4539	0.3888	0.1466	0.196	0.1303	-0.1034	0.0842	0.2867	0.0051	0.1378	-0.1626	-0.0058	-0.0508	0.0941	0.4641	0.509	0.3931
2	0.151	0.265	0.2753	0.0267	0.2698	0.2353	0.1508	0.4438	0.2931	0.4509	0.6524	0.2968	0.4885	0.617	0.2415	0.2041	0.0648	0.3483	0.1771	0.1956	0.2034	0.4202	0.4842	0.3104	0.2186	0.3297	0.1068	0.1534	0.2526	0.192	0.3637	0.266	0.4583	0.3909	0.1444	0.1967	0.1314	-0.1021	0.0791	0.2993	0.0127	0.1663	-0.1642	-0.0131	-0.05	0.0987	0.4749	0.498	0.4042
2.03333	0.1707	0.265	0.2738	0.02	0.267	0.2361	0.1558	0.4389	0.2877	0.4502	0.6612	0.2809	0.4784	0.6067	0.2574	0.2164	0.0592	0.3531	0.1763	0.1762	0.199	0.419	0.4911	0.3127	0.2143	0.3286	0.123	0.1637	0.2523	0.1831	0.3601	0.2704	0.4622	0.3953	0.1401	0.203	0.1293	-0.1005	0.0669	0.3077	0.01	0.1874	-0.1726	0.0046	-0.0516	0.098	0.4878	0.4901	0.4233
2.06667	0.1724	0.2645	0.284	0.0235	0.2663	0.2489	0.1573	0.4303	0.2804	0.4558	0.6501	0.2823	0.4658	0.6053	0.2685	0.2254	0.0412	0.3547	0.1878	0.15	0.2039	0.4062	0.4858	0.3112	0.2148	0.3202	0.1291	0.1683	0.2606	0.1841	0.359	0.2755	0.4678	0.3961	0.1362	0.2042	0.1345	-0.0938	0.0542	0.311	0.0092	0.1978	-0.1782	0.0191	-0.0574	0.0991	0.4947	0.491	0.4244
2.1	0.1716	0.2591	0.2846	0.017	0.2726	0.2713	0.1553	0.4317	0.2805	0.4645	0.6253	0.281	0.4645	0.5977	0.2774	0.2406	0.0255	0.3424	0.2007	0.1101	0.2181	0.3926	0.484	0.3173	0.2046	0.3096	0.131	0.1672	0.282	0.1913	0.3626	0.2911	0.4648	0.3991	0.1367	0.208	0.136	-0.0858	0.0497	0.3146	0.0058	0.1971	-0.1806	0.0212	-0.062	0.1046	0.4957	0.4967	0.4465
2.13333	0.1621	0.2449	0.2755	0.0145	0.2774	0.2991	0.143	0.4246	0.2758	0.4637	0.5728	0.2858	0.4606	0.5881	0.2808	0.2514	0.0227	0.3466	0.206	0.0733	0.2427	0.3895	0.5005	0.3234	0.1849	0.2971	0.1329	0.1605	0.294	0.1822	0.3682	0.3035	0.462	0.3972	0.1383	0.2134	0.1386	-0.0831	0.0465	0.3074	0.0068	0.1975	-0.1885	0.0328	-0.0682	0.1126	0.4924	0.502	0.4669
2.16667	0.1453	0.2475	0.2664	0.0176	0.2872	0.3089	0.121	0.4188	0.276	0.457	0.5549	0.2948	0.4611	0.565	0.2795	0.2699	0.0309	0.3428	0.1877	0.0663	0.2611	0.3869	0.4911	0.3211	0.1696	0.2829	0.1411	0.1605	0.3024	0.172	0.3717	0.3171	0.4612	0.3969	0.1392	0.2203	0.1468	-0.0753	0.0661	0.2994	0.0182	0.1969	-0.198	0.0376	-0.077	0.1186	0.4933	0.5046	0.4752
2.2	0.1262	0.2516	0.2668	0.0144	0.2887	0.3214	0.1206	0.4118	0.2868	0.4564	0.5443	0.2967	0.4686	0.5526	0.287	0.2838	0.0281	0.3416	0.1684	0.0146	0.2941	0.3913	0.5167	0.3246	0.1637	0.2695	0.1459	0.1442	0.3065	0.1633	0.3688	0.3135	0.462	0.397	0.138	0.2274	0.1484	-0.0652	0.0657	0.3122	0.0192	0.1871	-0.2144	0.0415	-0.0848	0.1176	0.4899	0.5116	0.4728
2.23333	0.1255	0.2482	0.2686	0.0182	0.2954	0.33	0.1161	0.4149	0.2918	0.4609	0.5353	0.3127	0.4808	0.5483	0.2966	0.3107	0.0252	0.3347	0.1519	0.0037	0.3063	0.3898	0.5343	0.3305	0.1676	0.2581	0.1478	0.1366	0.3104	0.1653	0.3705	0.3275	0.4615	0.3973	0.1279	0.2364	0.1513	-0.0605	0.0668	0.321	0.0157	0.183	-0.2325	0.0385	-0.0889	0.1176	0.4889	0.5145	0.4714
2.26667	0.1217	0.2647	0.2805	0.0088	0.3056	0.3393	0.1325	0.4223	0.2957	0.4643	0.511	0.3098	0.4898	0.5476	0.3016	0.328	0.0202	0.329	0.1469	-0.0214	0.3103	0.3867	0.5423	0.3404	0.1626	0.2464	0.1504	0.1279	0.3143	0.1661	0.3772	0.3403	0.4581	0.4002	0.1201	0.2438	0.1533	-0.0551	0.0613	0.3253	0.0157	0.184	-0.2411	0.0356	-0.0813	0.1156	0.4878	0.5085	0.4728
2.3	0.1145	0.2675	0.2831	0.0158	0.3084	0.3384	0.1459	0.3988	0.2989	0.4715	0.4961	0.3104	0.4869	0.5443	0.3032	0.3367	0.0219	0.3059	0.1416	-0.0345	0.3114	0.3839	0.5386	0.3493	0.1557	0.2526	0.1576	0.1291	0.3153	0.167	0.3863	0.3507	0.4575	0.3997	0.118	0.2483	0.1557	-0.0537	0.0509	0.3167	0.0086	0.1778	-0.2412	0.0257	-0.0726	0.1154	0.4835	0.5034	0.4752
2.33333	0.1072	0.271	0.2784	0.0132	0.3184	0.3505	0.1535	0.4019	0.3107	0.482	0.481	0.3044	0.4804	0.5277	0.2992	0.3394	0.0292	0.2886	0.1147	-0.0452	0.3095	0.3806	0.5443	0.359	0.1732	0.2611	0.1565	0.1352	0.3229	0.1667	0.3922	0.338	0.4509	0.4038	0.112	0.2484	0.1558	-0.0545	0.0514	0.2972	0.0154	0.1738	-0.2295	0.0184	-0.0711	0.1159	0.4824	0.493	0.4732
2.36667	0.1007	0.2679	0.2671	0.0064	0.3059	0.3506	0.1654	0.3922	0.321	0.4883	0.4616	0.2916	0.4689	0.5165	0.291	0.3374	0.0502	0.2817	0.0822	-0.0218	0.3049	0.392	0.5454	0.3547	0.1881	0.2647	0.1605	0.1386	0.3356	0.1716	0.3925	0.3371	0.4457	0.4056	0.0998	0.2465	0.1587	-0.053	0.0402	0.2808	0.0231	0.1676	-0.2138	0.0145	-0.0558	0.1154	0.4755	0.4784	0.4733
2.4	0.1009	0.2791	0.2463	-0.0032	0.3087	0.3547	0.1808	0.3806	0.3317	0.4917	0.4652	0.2923	0.454	0.5138	0.286	0.3322	0.07	0.2655	0.053	-0.0061	0.294	0.3997	0.5413	0.3616	0.2047	0.2653	0.1608	0.1519	0.3404	0.1702	0.3959	0.3421	0.4382	0.4078	0.0912	0.2459	0.157	-0.0548	0.0411	0.2574	0.0322	0.1693	-0.1941	0.0145	-0.0536	0.1166	0.4668	0.471	0.4726
2.43333	0.0978	0.2801	0.2342	-0.0086	0.3106	0.353	0.154	0.363	0.3268	0.4895	0.4654	0.2873	0.438	0.5101	0.2914	0.329	0.0864	0.2442	0.035	0.007	0.2732	0.4013	0.5244	0.3553	0.2117	0.2676	0.1564	0.1585	0.3424	0.182	0.3996	0.3488	0.4338	0.4095	0.0835	0.2453	0.1539	-0.0545	0.0302	0.2222	0.0375	0.1786	-0.1742	0.0158	-0.0472	0.1079	0.4722	0.4706	0.4641
2.46667	0.0988	0.2837	0.2288	-0.0125	0.3062	0.3467	0.1509	0.358	0.3345	0.4856	0.4686	0.3065	0.4248	0.5129	0.3002	0.3245	0.0964	0.2151	0.0315	-0.0124	0.2443	0.4081	0.4945	0.3388	0.2134	0.2556	0.1582	0.1727	0.3447	0.2005	0.3983	0.3552	0.4322	0.4096	0.0725	0.2468	0.1519	-0.0522	0.0278	0.1918	0.0431	0.1876	-0.1656	0.0216	-0.0435	0.0999	0.4776	0.4604	0.4587
2.5	0.0934	0.2778	0.2272	-0.0138	0.301	0.3469	0.1404	0.347	0.336	0.4758	0.48	0.3105	0.4103	0.502	0.3182	0.3195	0.0964	0.2017	0.0441	-0.008	0.2218	0.4207	0.4712	0.329	0.2166	0.2474	0.1527	0.1878	0.3313	0.2071	0.3846	0.3608	0.441	0.4081	0.072	0.2535	0.1499	-0.0477	0.0308	0.1671	0.0386	0.2003	-0.1629	0.0261	-0.0276	0.0979	0.4814	0.4438	0.4545
2.53333	0.0847	0.2746	0.2226	-0.02	0.2955	0.3428	0.1346	0.346	0.33	0.4607	0.4934	0.3146	0.3967	0.4956	0.3348	0.3212	0.094	0.1838	0.0987	0.0032	0.2031	0.4254	0.4416	0.3265	0.2203	0.2555	0.1617	0.2025	0.3293	0.2157	0.3793	0.3585	0.4434	0.4159	0.0679	0.2562	0.1556	-0.0438	0.0197	0.1476	0.0287	0.2113	-0.1662	0.0305	-0.024	0.1	0.4784	0.4278	0.4487
2.56667	0.0808	0.2627	0.2153	-0.0221	0.2914	0.3426	0.1377	0.3413	0.313	0.4555	0.5094	0.3131	0.3869	0.4852	0.3565	0.3198	0.1018	0.1561	0.1156	0.0195	0.1772	0.4069	0.4328	0.3191	0.2341	0.2614	0.1674	0.2193	0.3296	0.2174	0.3733	0.3629	0.4393	0.4191	0.0625	0.2517	0.1515	-0.042	0.03	0.1292	0.0196	0.2197	-0.1751	0.0222	-0.0252	0.1038	0.4826	0.4155	0.4406
2.6	0.0773	0.2603	0.2094	-0.0353	0.2717	0.3437	0.14	0.3336	0.2957	0.4455	0.4995	0.3134	0.3825	0.4792	0.3778	0.3221	0.117	0.1304	0.1391	0.0329	0.1573	0.3983	0.4221	0.322	0.2384	0.2555	0.1678	0.2168	0.3282	0.1944	0.3688	0.3598	0.4414	0.4194	0.0571	0.2403	0.1523	-0.0424	0.0399	0.1135	0.0145	0.2266	-0.1797	0.0161	-0.0231	0.1071	0.4882	0.4034	0.4339
2.63333	0.0748	0.2376	0.1987	-0.0606	0.2622	0.3418	0.1512	0.336	0.2804	0.4446	0.4807	0.3433	0.3794	0.476	0.3984	0.3323	0.1383	0.1207	0.1474	0.0443	0.1449	0.3904	0.4099	0.343	0.2404	0.2466	0.1601	0.2194	0.3302	0.1765	0.3688	0.3562	0.4332	0.416	0.0576	0.2364	0.1507	-0.043	0.0516	0.105	0.0152	0.2321	-0.186	0.0077	-0.021	0.1072	0.4903	0.3966	0.4351
2.66667	0.073	0.2241	0.1837	-0.0742	0.2524	0.3408	0.1593	0.3344	0.2623	0.4367	0.4645	0.3369	0.3877	0.48	0.3798	0.3334	0.1553	0.1089	0.158	0.0493	0.1329	0.3812	0.4089	0.3527	0.2438	0.2374	0.1426	0.2112	0.3081	0.172	0.3749	0.3486	0.4312	0.4059	0.0591	0.2356	0.1519	-0.0471	0.0622	0.0957	0.021	0.2294	-0.1974	0.0143	-0.0193	0.1095	0.4682	0.3907	0.4367
2.7	0.0678	0.2177	0.1758	-0.0792	0.2334	0.3402	0.1633	0.341	0.2464	0.4393	0.4347	0.3193	0.3852	0.4659	0.3817	0.3333	0.1687	0.1046	0.1412	0.0654	0.1311	0.3744	0.4198	0.354	0.2419	0.2194	0.1368	0.1925	0.2938	0.1581	0.3747	0.3517	0.432	0.4028	0.0587	0.24	0.1539	-0.0452	0.0704	0.0893	0.0487	0.2393	-0.1997	0.02	-0.018	0.1154	0.4466	0.3905	0.4416
2.73333	0.0621	0.2075	0.172	-0.0875	0.2343	0.3378	0.1665	0.3505	0.2359	0.4475	0.4275	0.3133	0.3823	0.4816	0.3798	0.3346	0.1882	0.0875	0.1279	0.0876	0.1382	0.3561	0.4211	0.3618	0.2412	0.2017	0.129	0.1746	0.2878	0.1519	0.3705	0.3511	0.4339	0.4055	0.0583	0.2389	0.1543	-0.0463	0.0804	0.0952	0.0673	0.2615	-0.1991	0.023	-0.0132	0.113	0.4221	0.3883	0.4517
2.76667	0.0556	0.1935	0.1763	-0.0963	0.2303	0.3402	0.1433	0.3603	0.2242	0.4682	0.403	0.3086	0.3826	0.4924	0.3746	0.339	0.2061	0.0732	0.1118	0.1037	0.1483	0.3442	0.4109	0.3688	0.2442	0.1817	0.1059	0.166	0.2763	0.1389	0.3658	0.345	0.4333	0.4028	0.0565	0.2405	0.1582	-0.0449	0.0848	0.0924	0.0741	0.2704	-0.1858	0.0167	-0.0187	0.1176	0.4021	0.3911	0.4587
2.8	0.0524	0.1629	0.1694	-0.0872	0.2165	0.3382	0.1416	0.355	0.2085	0.4711	0.3926	0.2982	0.3656	0.4783	0.3714	0.3355	0.2113	0.0792	0.1007	0.1143	0.1471	0.327	0.4091	0.3725	0.252	0.1675	0.0936	0.161	0.2659	0.165	0.3611	0.3394	0.4294	0.3984	0.0585	0.2442	0.1622	-0.0407	0.0921	0.0861	0.0863	0.2784	-0.1967	0.0034	-0.0215	0.1186	0.3858	0.3845	0.4622
2.83333	0.0532	0.1418	0.1634	-0.0773	0.2017	0.3361	0.1329	0.3415	0.1968	0.4752	0.4001	0.2753	0.3568	0.4687	0.3673	0.3292	0.2098	0.0837	0.1053	0.1232	0.147	0.3186	0.404	0.3805	0.2572	0.1806	0.0861	0.1658	0.2706	0.1675	0.3521	0.3406	0.4309	0.3867	0.06	0.2478	0.1705	-0.0427	0.1029	0.0827	0.0998	0.2898	-0.2051	-0.0088	-0.0291	0.1198	0.3763	0.3694	0.4568
2.86667	0.053	0.1288	0.1567	-0.0725	0.1944	0.3407	0.1092	0.3335	0.1851	0.4814	0.3975	0.2698	0.3528	0.4631	0.364	0.3188	0.2028	0.0885	0.0938	0.1462	0.1542	0.3039	0.3908	0.3863	0.2757	0.2011	0.0638	0.1792	0.2736	0.1675	0.3435	0.3449	0.4242	0.3725	0.0618	0.255	0.1736	-0.0413	0.1088	0.0845	0.0913	0.3016	-0.2015	-0.0149	-0.0333	0.1135	0.3688	0.364	0.4489
2.9	0.0513	0.1146	0.162	-0.0696	0.1881	0.3564	0.098	0.3283	0.1792	0.4773	0.3927	0.2792	0.3514	0.4628	0.3567	0.3011	0.2007	0.0934	0.1075	0.1459	0.1636	0.2937	0.3824	0.3851	0.2947	0.1973	0.0459	0.1878	0.279	0.1817	0.3395	0.3463	0.3984	0.3533	0.0581	0.2644	0.173	-0.0426	0.1299	0.0927	0.0965	0.3129	-0.1942	-0.0198	-0.0289	0.1132	0.3624	0.3643	0.4466
2.93333	0.0473	0.1072	0.1666	-0.0681	0.1839	0.3803	0.0861	0.323	0.1783	0.472	0.3975	0.2921	0.3369	0.4569	0.3573	0.2834	0.1976	0.1026	0.1181	0.1487	0.167	0.2894	0.3716	0.3824	0.2941	0.1933	0.0399	0.1891	0.2836	0.1357	0.3433	0.346	0.3884	0.3468	0.0563	0.2728	0.1733	-0.043	0.1255	0.0962	0.0993	0.3123	-0.1941	-0.0182	-0.0229	0.1099	0.361	0.3711	0.44
2.96667	0.0478	0.0799	0.1696	-0.0713	0.18	0.4048	0.0801	0.3282	0.1734	0.4728	0.3997	0.2946	0.3074	0.4493	0.3631	0.2751	0.1917	0.1054	0.1291	0.1555	0.1579	0.2816	0.372	0.3873	0.2985	0.1981	0.0374	0.1831	0.2853	0.1212	0.3413	0.3457	0.3758	0.3377	0.0562	0.2818	0.1715	-0.047	0.1201	0.1019	0.1005	0.3133	-0.1916	-0.0181	-0.0189	0.109	0.3522	0.378	0.4324
3	0.0495	0.0664	0.1689	-0.0727	0.1668	0.43	0.0856	0.336	0.1744	0.4784	0.401	0.2861	0.2827	0.4517	0.3731	0.2667	0.1856	0.1068	0.1241	0.1535	0.1534	0.2774	0.378	0.4025	0.3074	0.2035	0.0395	0.1635	0.2852	0.1188	0.339	0.343	0.3748	0.3321	0.0571	0.2872	0.1702	-0.0581	0.1206	0.1053	0.0983	0.3123	-0.1888	-0.0028	-0.0212	0.1119	0.3451	0.3798	0.4236
3.03333	0.0536	0.0634	0.1925	-0.069	0.1559	0.4364	0.0654	0.3405	0.1712	0.4767	0.4069	0.3079	0.2693	0.4366	0.3748	0.2546	0.1786	0.1046	0.1432	0.141	0.1694	0.2671	0.3625	0.4114	0.3169	0.2171	0.0292	0.1469	0.2721	0.1228	0.336	0.3327	0.3803	0.3187	0.0569	0.2896	0.1639	-0.0562	0.1069	0.1058	0.0957	0.3111	-0.1863	-0.0017	-0.0207	0.1148	0.3375	0.3723	0.3854
3.06667	0.0563	0.061	0.1976	-0.0705	0.153	0.4409	0.0565	0.335	0.1727	0.476	0.4033	0.3006	0.2549	0.4325	0.3774	0.2442	0.1731	0.1114	0.1521	0.1362	0.1843	0.2479	0.3481	0.4125	0.3297	0.2261	0.0033	0.1286	0.2492	0.1449	0.3304	0.3262	0.3827	0.3124	0.0559	0.2923	0.1628	-0.0517	0.0877	0.1066	0.0819	0.3067	-0.1802	0.0003	-0.0214	0.1105	0.3179	0.3699	0.3623
3.1	0.0585	0.0859	0.1924	-0.0599	0.163	0.4362	0.0634	0.3339	0.1856	0.4755	0.3927	0.2824	0.2462	0.436	0.3856	0.2344	0.1801	0.0936	0.1465	0.1345	0.1908	0.2358	0.3339	0.4094	0.3374	0.2379	0.0089	0.1175	0.2454	0.1421	0.3257	0.3218	0.3865	0.2977	0.055	0.2981	0.1605	-0.0447	0.0814	0.1071	0.0604	0.3023	-0.1924	0.003	-0.0226	0.1017	0.3102	0.3742	0.3468
3.13333	0.0555	0.0875	0.1976	-0.0503	0.1628	0.4284	0.061	0.3312	0.1814	0.4754	0.3917	0.2572	0.2352	0.4418	0.3955	0.2253	0.1877	0.0945	0.1492	0.139	0.1857	0.2252	0.3325	0.406	0.3383	0.2565	0.0006	0.0974	0.2204	0.1446	0.3277	0.3159	0.3791	0.2847	0.0552	0.3018	0.1556	-0.0316	0.0783	0.1005	0.0512	0.2909	-0.1985	-0.0079	-0.021	0.0817	0.313	0.3668	0.3418
3.16667	0.0522	0.1072	0.196	-0.0488	0.168	0.4231	0.0552	0.3228	0.1936	0.4722	0.3996	0.255	0.2207	0.4487	0.3995	0.2161	0.1874	0.1139	0.1502	0.1514	0.1804	0.2147	0.3289	0.4084	0.3428	0.246	-0.0005	0.0895	0.2257	0.1438	0.3322	0.3084	0.3717	0.2784	0.0535	0.3061	0.1564	-0.0239	0.0804	0.0933	0.0474	0.2832	-0.1965	-0.0169	-0.0188	0.0575	0.3147	0.3572	0.3379
3.2	0.0436	0.123	0.1985	-0.0372	0.1722	0.418	0.0613	0.3108	0.1978	0.4689	0.4162	0.2391	0.2099	0.4477	0.4031	0.2094	0.1881	0.1333	0.1333	0.1599	0.1605	0.2121	0.3119	0.4176	0.3465	0.2486	-0.0086	0.0941	0.2399	0.1497	0.3346	0.3057	0.3882	0.2634	0.0573	0.3068	0.158	-0.0119	0.0726	0.0862	0.0425	0.2813	-0.1991	-0.0279	-0.0201	0.046	0.322	0.3483	0.329
3.23333	0.0445	0.1468	0.2079	-0.0315	0.1664	0.4103	0.0568	0.3036	0.2039	0.4651	0.4252	0.2232	0.2111	0.447	0.3934	0.2067	0.1808	0.1379	0.1284	0.1803	0.1583	0.2131	0.2923	0.4088	0.3458	0.2699	-0.0153	0.0986	0.2399	0.1505	0.3372	0.3084	0.387	0.2532	0.0569	0.3042	0.1537	-0.0013	0.0732	0.0768	0.0303	0.2818	-0.1822	-0.0374	-0.0207	0.0408	0.3327	0.3312	0.3241
3.26667	0.0412	0.1568	0.2296	-0.0118	0.1622	0.4001	0.0458	0.2876	0.2093	0.4652	0.4235	0.2115	0.2049	0.444	0.3876	0.2039	0.1749	0.1445	0.125	0.2011	0.1563	0.2135	0.273	0.4108	0.3336	0.2955	-0.0159	0.103	0.244	0.1341	0.339	0.3074	0.3749	0.2458	0.0589	0.3006	0.1465	0.011	0.0732	0.0763	0.0235	0.2789	-0.1628	-0.0522	-0.0181	0.0396	0.3427	0.3108	0.3238
3.3	0.0384	0.1696	0.2369	-0.0179	0.1599	0.4022	0.0728	0.2616	0.2124	0.4636	0.4287	0.1935	0.1984	0.4349	0.3752	0.208	0.1669	0.1429	0.1155	0.2148	0.1443	0.2229	0.2825	0.3874	0.3161	0.3092	-0.016	0.1034	0.2756	0.1317	0.3429	0.3106	0.3774	0.2419	0.0617	0.2998	0.1507	0.0161	0.0851	0.0768	0.0194	0.2781	-0.1498	-0.0668	-0.0244	0.0265	0.337	0.2951	0.3093
3.33333	0.0375	0.172	0.2385	-0.0194	0.1547	0.4135	0.0725	0.2472	0.2196	0.4576	0.4212	0.1921	0.1891	0.4467	0.3675	0.2028	0.1526	0.1509	0.1179	0.2073	0.1412	0.2375	0.3111	0.3701	0.3114	0.3173	-0.0076	0.0988	0.2475	0.1412	0.3377	0.314	0.3629	0.2463	0.0598	0.3009	0.1507	0.0267	0.0858	0.0727	0.0191	0.2768	-0.1535	-0.0773	-0.0322	0.0182	0.3173	0.267	0.2938
3.36667	0.0315	0.1679	0.2426	-0.0093	0.1524	0.4105	0.0784	0.2422	0.2206	0.451	0.4159	0.1863	0.1872	0.4385	0.3585	0.207	0.1455	0.1643	0.122	0.1744	0.14	0.2609	0.3049	0.3638	0.301	0.3339	-0.0028	0.0945	0.2215	0.1647	0.3373	0.3054	0.3814	0.2519	0.0591	0.2985	0.1528	0.0274	0.1019	0.0678	0.0233	0.2766	-0.1561	-0.0836	-0.0377	0.0097	0.3147	0.2513	0.2851
3.4	0.0268	0.1642	0.2412	-0.0149	0.1587	0.4054	0.096	0.2401	0.2242	0.4476	0.403	0.2005	0.183	0.4254	0.3581	0.2158	0.1316	0.182	0.1307	0.1496	0.1347	0.273	0.3022	0.3607	0.2873	0.35	0.001	0.1013	0.2105	0.1778	0.3375	0.302	0.3767	0.2585	0.0626	0.2991	0.1514	0.0217	0.1051	0.0625	0.0227	0.2702	-0.1555	-0.0944	-0.0398	0.0027	0.3049	0.2401	0.2864
3.43333	0.0276	0.1699	0.2367	-0.0046	0.1808	0.4011	0.1023	0.2255	0.2263	0.431	0.3895	0.1897	0.1746	0.418	0.3564	0.2192	0.1241	0.1997	0.1481	0.1487	0.1367	0.275	0.2966	0.3622	0.2699	0.3597	0.0111	0.1021	0.2196	0.1859	0.3422	0.2998	0.3729	0.2639	0.0699	0.2965	0.1474	0.0194	0.1085	0.0591	0.019	0.2669	-0.1597	-0.09	-0.0386	-0.0108	0.2898	0.2297	0.2792
3.46667	0.0313	0.1699	0.2339	-0.002	0.1995	0.3872	0.1144	0.2054	0.2435	0.4221	0.3833	0.188	0.1635	0.4037	0.3671	0.2298	0.1148	0.2123	0.159	0.1577	0.1214	0.267	0.2939	0.3647	0.2451	0.3777	0.0191	0.1132	0.2273	0.1888	0.3437	0.3009	0.3567	0.2695	0.0747	0.2983	0.1439	0.0197	0.1166	0.064	0.0219	0.2697	-0.1586	-0.0995	-0.043	-0.0256	0.2808	0.2195	0.2666
3.5	0.0335	0.1716	0.2237	0.0047	0.2084	0.3725	0.116	0.188	0.2578	0.4176	0.3805	0.1887	0.163	0.3937	0.3607	0.2477	0.1046	0.2187	0.196	0.1756	0.1	0.2641	0.2808	0.3561	0.2187	0.3976	0.0181	0.1145	0.2353	0.2115	0.3448	0.3004	0.349	0.2658	0.0855	0.2998	0.1407	0.0222	0.1239	0.0633	0.0301	0.2734	-0.1456	-0.1067	-0.0442	-0.0381	0.2851	0.2177	0.2515
3.53333	0.0388	0.1859	0.2028	-0.0058	0.2157	0.362	0.1048	0.1753	0.2625	0.4163	0.3776	0.1878	0.159	0.3825	0.351	0.2635	0.107	0.2206	0.25	0.1841	0.0767	0.2733	0.2749	0.3526	0.2013	0.4123	0.0302	0.1237	0.2494	0.2216	0.3348	0.2932	0.3417	0.2613	0.0903	0.3016	0.138	0.0219	0.1363	0.0628	0.0346	0.2791	-0.1383	-0.0983	-0.0469	-0.0554	0.2791	0.22	0.2519
3.56667	0.0443	0.1838	0.2034	-0.01	0.2179	0.3506	0.092	0.1689	0.2614	0.4148	0.3945	0.1977	0.1569	0.3645	0.3343	0.2761	0.1069	0.2215	0.2592	0.1816	0.0741	0.3003	0.268	0.3254	0.1862	0.4206	0.0389	0.1353	0.2574	0.2312	0.3343	0.2921	0.3424	0.2627	0.1018	0.2951	0.1363	0.0208	0.1506	0.0545	0.0407	0.2924	-0.1278	-0.0911	-0.0493	-0.0695	0.2689	0.2245	0.2549
3.6	0.0476	0.1807	0.1803	0.0002	0.2168	0.3395	0.0878	0.169	0.2534	0.4093	0.4184	0.2067	0.152	0.3476	0.3294	0.2829	0.1037	0.2107	0.2707	0.2065	0.0765	0.3143	0.2522	0.319	0.1686	0.4134	0.0476	0.1462	0.2492	0.2357	0.3337	0.2854	0.3454	0.2667	0.1131	0.2874	0.1387	0.0206	0.1553	0.0456	0.0486	0.3064	-0.1207	-0.0965	-0.0492	-0.0797	0.2553	0.2188	0.2525
3.63333	0.0512	0.1793	0.1803	0.0206	0.2072	0.3382	0.1052	0.1599	0.2482	0.401	0.4384	0.2002	0.1293	0.3328	0.3234	0.2945	0.1086	0.2116	0.2621	0.2296	0.0718	0.3317	0.2407	0.3207	0.1509	0.3932	0.063	0.1553	0.2521	0.2611	0.3254	0.2809	0.349	0.2778	0.1154	0.2855	0.1416	0.0168	0.1635	0.043	0.062	0.302	-0.1114	-0.0939	-0.0464	-0.0916	0.2404	0.2072	0.2477
3.66667	0.0511	0.1765	0.1887	0.0296	0.1995	0.3349	0.1163	0.1527	0.2346	0.3888	0.4446	0.196	0.1299	0.326	0.314	0.2956	0.1003	0.2123	0.2486	0.2436	0.0519	0.3443	0.2499	0.3257	0.1237	0.3654	0.069	0.1696	0.2589	0.283	0.3214	0.2844	0.3567	0.284	0.1173	0.2882	0.1416	0.0182	0.1711	0.0448	0.0726	0.2868	-0.0995	-0.0959	-0.0427	-0.1018	0.2168	0.1904	0.2367
3.7	0.0546	0.1698	0.187	0.0427	0.1992	0.3263	0.1223	0.1547	0.2252	0.376	0.4298	0.1936	0.1277	0.3311	0.3089	0.3044	0.096	0.2038	0.2329	0.2465	0.0421	0.3514	0.2341	0.3213	0.1233	0.3438	0.0714	0.1816	0.2645	0.3027	0.3234	0.2913	0.3593	0.2872	0.1181	0.2858	0.1454	0.0137	0.1821	0.0364	0.0801	0.2868	-0.0827	-0.0913	-0.047	-0.1054	0.2104	0.1788	0.2434
3.73333	0.0551	0.1672	0.1752	0.041	0.2063	0.3236	0.1492	0.1525	0.2198	0.3609	0.4281	0.2078	0.1266	0.3283	0.2947	0.311	0.0866	0.1996	0.2419	0.204	0.0336	0.3817	0.2436	0.3133	0.1286	0.3312	0.0776	0.1947	0.2717	0.3079	0.3214	0.2892	0.3526	0.2959	0.1148	0.2814	0.1466	0.0145	0.1973	0.0261	0.078	0.2899	-0.0654	-0.0882	-0.0461	-0.1009	0.1997	0.1623	0.2364
3.76667	0.0542	0.1586	0.1829	0.0438	0.2191	0.3284	0.1226	0.148	0.2204	0.3525	0.4172	0.2174	0.1508	0.3161	0.2866	0.3154	0.0769	0.1925	0.2346	0.198	0.0242	0.3887	0.2395	0.2995	0.1475	0.3183	0.066	0.2064	0.2741	0.3043	0.3231	0.2825	0.355	0.2981	0.121	0.2777	0.1497	0.0079	0.2104	0.0228	0.0803	0.2957	-0.0463	-0.0635	-0.0429	-0.0969	0.1827	0.1431	0.2487
3.8	0.0515	0.1528	0.181	0.0508	0.2263	0.325	0.1159	0.1324	0.2161	0.3422	0.3929	0.2356	0.1635	0.3071	0.2767	0.3167	0.063	0.1811	0.2095	0.1438	0.0342	0.3758	0.2278	0.293	0.1527	0.3094	0.0589	0.2153	0.273	0.2939	0.3237	0.2808	0.3588	0.2953	0.1292	0.2757	0.1556	0.0015	0.217	0.0111	0.0758	0.3003	-0.0222	-0.044	-0.0409	-0.0993	0.1602	0.1373	0.2449
3.83333	0.0474	0.1493	0.1803	0.0503	0.235	0.322	0.1359	0.1287	0.2193	0.3354	0.3694	0.2516	0.1628	0.3123	0.2648	0.3183	0.0531	0.157	0.2157	0.1268	0.0316	0.3569	0.1987	0.2989	0.1583	0.312	0.0697	0.2157	0.2732	0.2712	0.3247	0.2807	0.3591	0.2866	0.1263	0.2729	0.1581	-0.0029	0.2098	0.0052	0.0782	0.2839	-0.0021	-0.0227	-0.0437	-0.0963	0.1555	0.1344	0.2415
3.86667	0.0411	0.1545	0.1635	0.0462	0.2361	0.3326	0.1088	0.1124	0.218	0.3357	0.3546	0.2602	0.157	0.3181	0.2579	0.3168	0.0482	0.1369	0.2035	0.1278	0.0116	0.3378	0.2019	0.2981	0.1562	0.3196	0.0703	0.2121	0.2642	0.2454	0.318	0.2748	0.3662	0.277	0.131	0.2683	0.1593	-0.011	0.2041	0.0059	0.0706	0.2702	0.0094	-0.0193	-0.0436	-0.0926	0.1596	0.1406	0.245
3.9	0.0393	0.145	0.1676	0.0239	0.2228	0.3329	0.1149	0.1122	0.2244	0.3417	0.3447	0.2737	0.1441	0.2979	0.2623	0.3176	0.0461	0.1301	0.1684	0.1188	0.008	0.3307	0.2029	0.2842	0.1428	0.3234	0.0587	0.1903	0.2697	0.2313	0.314	0.2767	0.3725	0.2687	0.1395	0.2581	0.1632	-0.0139	0.1966	0.0133	0.0598	0.2627	0.0266	-0.0172	-0.0454	-0.0929	0.1613	0.1455	0.2366
3.93333	0.0369	0.1201	0.1729	0.0132	0.2162	0.3374	0.1464	0.1122	0.2194	0.341	0.3375	0.2686	0.1402	0.3067	0.2698	0.3184	0.0479	0.12	0.1519	0.1275	0.0044	0.3303	0.23	0.2567	0.1292	0.3266	0.0851	0.1672	0.2751	0.2359	0.3095	0.278	0.3761	0.2561	0.1457	0.2558	0.1699	-0.0285	0.1935	0.0141	0.0461	0.2682	0.0561	-0.0166	-0.0543	-0.0785	0.1596	0.1425	0.2311
3.96667	0.0337	0.0984	0.1798	-0.004	0.2133	0.3419	0.1473	0.1144	0.2205	0.3374	0.3392	0.2572	0.1507	0.3084	0.2769	0.32	0.0454	0.1249	0.1391	0.1165	-0.0125	0.3379	0.2472	0.2524	0.1239	0.3343	0.0843	0.1492	0.2832	0.2355	0.312	0.2759	0.3857	0.2471	0.1537	0.2586	0.1783	-0.0347	0.1876	0.0233	0.0251	0.2761	0.0768	-0.004	-0.0619	-0.0697	0.1525	0.1361	0.2414
4	0.0355	0.0922	0.184	0.0042	0.2133	0.3332	0.1397	0.1327	0.2115	0.3281	0.3358	0.2639	0.1631	0.3148	0.2824	0.3173	0.0366	0.1208	0.139	0.0971	-0.0334	0.3457	0.2582	0.2499	0.1195	0.3369	0.0948	0.131	0.2731	0.2132	0.3114	0.2796	0.3997	0.242	0.1579	0.2568	0.1848	-0.0466	0.1798	0.0434	0.0116	0.2972	0.0863	0.0037	-0.0645	-0.0589	0.1487	0.139	0.2503
4.03333	0.0471	0.0925	0.1796	-0.0098	0.1878	0.3367	0.1565	0.1441	0.2022	0.3321	0.3276	0.2526	0.1714	0.3237	0.2815	0.3189	0.029	0.1145	0.1424	0.0771	-0.0478	0.3562	0.2669	0.254	0.1156	0.3346	0.0881	0.1167	0.2829	0.2042	0.3099	0.2888	0.4022	0.2434	0.1639	0.2571	0.1867	-0.0576	0.1741	0.0459	0.0028	0.3097	0.091	0.0084	-0.0669	-0.0537	0.1444	0.1356	0.2388
4.06667	0.052	0.1044	0.1845	-0.0171	0.1692	0.337	0.1558	0.1608	0.1938	0.3409	0.319	0.2376	0.176	0.3078	0.2783	0.3214	0.0288	0.0975	0.1445	0.0731	-0.0449	0.3441	0.2765	0.2628	0.1161	0.325	0.0805	0.1197	0.2923	0.1953	0.3037	0.2964	0.4108	0.2429	0.1646	0.2591	0.1893	-0.0668	0.1752	0.0439	0.0055	0.3058	0.0896	0.0042	-0.0694	-0.0557	0.1499	0.1357	0.2406
4.1	0.0581	0.1187	0.1856	-0.023	0.1597	0.3424	0.1392	0.1839	0.1854	0.3663	0.3064	0.2325	0.1756	0.307	0.2761	0.322	0.0306	0.0782	0.155	0.0924	-0.0352	0.3399	0.2895	0.2685	0.0908	0.3192	0.0831	0.128	0.2963	0.1771	0.2941	0.2954	0.4148	0.2499	0.1661	0.2623	0.1954	-0.0729	0.1705	0.0363	0.004	0.3156	0.0782	-0.0116	-0.0688	-0.0555	0.1588	0.1427	0.2279
4.13333	0.0564	0.1342	0.1699	-0.0155	0.1698	0.3495	0.1372	0.1949	0.1847	0.3825	0.304	0.2301	0.1853	0.3186	0.271	0.3222	0.0309	0.0662	0.1675	0.094	-0.0333	0.3283	0.2938	0.271	0.0858	0.3145	0.099	0.1215	0.3125	0.1741	0.2879	0.293	0.4219	0.254	0.1615	0.2674	0.1996	-0.072	0.1615	0.0341	-0.0005	0.3252	0.0651	-0.0181	-0.0655	-0.0564	0.162	0.1484	0.2261
4.16667	0.0575	0.146	0.1703	-0.0092	0.1822	0.3523	0.171	0.2099	0.185	0.3762	0.2915	0.2351	0.1811	0.3121	0.2666	0.3242	0.0289	0.0552	0.1847	0.0851	-0.0446	0.35	0.3007	0.2784	0.0764	0.3165	0.0997	0.1122	0.3333	0.1832	0.2748	0.2915	0.4181	0.2744	0.1553	0.2691	0.2039	-0.0602	0.1577	0.0309	-0.0035	0.3274	0.0589	-0.0237	-0.0639	-0.0546	0.1736	0.1513	0.2249
4.2	0.0488	0.1532	0.159	-6.226e-05	0.1897	0.3493	0.1422	0.2042	0.1795	0.3731	0.2792	0.2436	0.1845	0.2999	0.2588	0.3263	0.0248	0.032	0.2049	0.0888	-0.045	0.3743	0.2912	0.2664	0.0674	0.312	0.1004	0.1066	0.3415	0.1929	0.2717	0.2874	0.4078	0.2759	0.1526	0.2674	0.2028	-0.0554	0.1545	0.0311	0.0052	0.3236	0.0618	-0.0271	-0.0581	-0.0591	0.1847	0.159	0.225
4.23333	0.0438	0.1713	0.1643	0.0094	0.1862	0.3463	0.1346	0.2033	0.1748	0.3823	0.2665	0.2484	0.1776	0.3041	0.2523	0.3247	0.0226	0.0173	0.2182	0.0986	-0.0404	0.3839	0.2849	0.2669	0.0557	0.3113	0.112	0.1118	0.3636	0.1984	0.2668	0.2897	0.4107	0.2709	0.1568	0.267	0.2056	-0.0441	0.1607	0.0388	0.0054	0.3199	0.0704	-0.0327	-0.057	-0.0638	0.2073	0.1655	0.2261
4.26667	0.0371	0.1853	0.1667	0.0168	0.1773	0.3477	0.1167	0.2062	0.1716	0.3916	0.259	0.2514	0.1674	0.2988	0.2523	0.3152	0.0248	0.0033	0.2309	0.092	-0.0457	0.4	0.277	0.2767	0.0453	0.2898	0.1139	0.1085	0.363	0.1866	0.2501	0.2987	0.4116	0.269	0.1592	0.2683	0.2049	-0.0283	0.1782	0.0432	-0.0024	0.3166	0.0729	-0.0444	-0.0573	-0.0747	0.2251	0.1826	0.2237
4.3	0.0349	0.1958	0.1625	0.035	0.1809	0.345	0.1038	0.2049	0.1728	0.392	0.2449	0.2492	0.1579	0.3097	0.2542	0.3045	0.0323	-6.594e-05	0.229	0.0915	-0.0522	0.4045	0.2721	0.287	0.0539	0.2803	0.1103	0.1148	0.3704	0.178	0.2441	0.2907	0.4131	0.2689	0.1606	0.2686	0.2031	-0.0159	0.195	0.046	-0.0118	0.3109	0.0824	-0.0556	-0.055	-0.0912	0.2348	0.195	0.2195
4.33333	0.0352	0.2109	0.1454	0.0571	0.1742	0.3473	0.0962	0.2084	0.1765	0.3935	0.2335	0.2649	0.1479	0.3159	0.2603	0.2853	0.0361	-0.0007	0.246	0.0861	-0.0521	0.3875	0.2847	0.2669	0.0635	0.2652	0.114	0.1182	0.3631	0.1793	0.237	0.309	0.4166	0.2652	0.1617	0.2689	0.1978	-0.0089	0.2122	0.0517	-0.0281	0.317	0.0973	-0.0756	-0.0578	-0.0976	0.2461	0.2047	0.2147
4.36667	0.0414	0.2287	0.129	0.0791	0.1793	0.3495	0.081	0.2166	0.1738	0.4	0.2483	0.2691	0.1357	0.3056	0.2645	0.2693	0.0416	-0.0029	0.2507	0.0888	-0.0558	0.3782	0.284	0.2627	0.0573	0.268	0.1158	0.1269	0.3597	0.1603	0.2244	0.3258	0.4218	0.2663	0.1597	0.2704	0.1951	0.0006	0.2099	0.0502	-0.0371	0.311	0.1059	-0.0901	-0.0684	-0.0994	0.2588	0.207	0.2203
4.4	0.0458	0.2368	0.1252	0.093	0.1978	0.3662	0.0931	0.2146	0.1747	0.4127	0.2552	0.2759	0.1438	0.2912	0.2641	0.262	0.0371	0.0037	0.2446	0.0787	-0.056	0.3647	0.277	0.268	0.0534	0.2645	0.1099	0.1268	0.3565	0.1592	0.2145	0.3375	0.4205	0.266	0.1581	0.2709	0.1911	0.0075	0.2143	0.0543	-0.0379	0.3045	0.1154	-0.0917	-0.0657	-0.0946	0.2693	0.2134	0.2167
4.43333	0.0524	0.2369	0.1249	0.0867	0.2131	0.3778	0.0979	0.2097	0.171	0.4262	0.2497	0.2786	0.1522	0.2541	0.2617	0.255	0.037	0.0146	0.2464	0.0546	-0.0578	0.356	0.2644	0.2778	0.0613	0.2687	0.1124	0.12	0.3577	0.162	0.2132	0.3466	0.415	0.2636	0.1644	0.27	0.1828	0.0131	0.2136	0.0595	-0.0418	0.3025	0.1231	-0.1021	-0.0807	-0.0912	0.2668	0.2178	0.2157
4.46667	0.0584	0.2403	0.1172	0.0656	0.2072	0.3823	0.0972	0.2017	0.1673	0.4466	0.2108	0.2902	0.154	0.2421	0.2592	0.2516	0.0373	0.0246	0.2431	0.0237	-0.0741	0.3418	0.2664	0.288	0.0686	0.2872	0.1142	0.1178	0.3475	0.1682	0.217	0.347	0.4175	0.2655	0.1674	0.2725	0.1762	0.0211	0.219	0.0555	-0.0305	0.324	0.1394	-0.1059	-0.0901	-0.0891	0.2599	0.2223	0.2198
4.5	0.0648	0.2356	0.1156	0.0672	0.206	0.3779	0.0914	0.2064	0.1629	0.4622	0.1999	0.2982	0.1591	0.2322	0.2553	0.2356	0.0365	0.025	0.2631	0.0089	-0.1	0.3425	0.2719	0.3043	0.0748	0.2914	0.1098	0.1117	0.3462	0.1789	0.2156	0.338	0.4162	0.2708	0.1702	0.2771	0.1725	0.0241	0.2243	0.0406	-0.0175	0.3455	0.1365	-0.1038	-0.099	-0.077	0.2503	0.229	0.2239
4.53333	0.0696	0.2222	0.1248	0.0579	0.2065	0.3704	0.0878	0.209	0.1583	0.4761	0.1797	0.3054	0.1661	0.2317	0.2556	0.2226	0.0396	0.0224	0.2897	0.0072	-0.1071	0.3361	0.2662	0.3161	0.0734	0.3048	0.1218	0.1066	0.3279	0.1981	0.2197	0.3343	0.4093	0.2664	0.1674	0.2805	0.1664	0.0259	0.236	0.0347	-0.0025	0.3436	0.1258	-0.1045	-0.1052	-0.0741	0.2509	0.2304	0.2317
4.56667	0.0731	0.2048	0.1397	0.0575	0.223	0.3641	0.0995	0.2157	0.1538	0.4811	0.1541	0.3145	0.1714	0.2216	0.2515	0.2143	0.0497	0.0178	0.288	0.0122	-0.1061	0.3315	0.2675	0.321	0.0503	0.3112	0.1156	0.121	0.3178	0.2253	0.2195	0.3381	0.4052	0.2672	0.1582	0.283	0.1655	0.0206	0.2365	0.0225	0.0303	0.3378	0.1253	-0.1033	-0.1158	-0.0823	0.2553	0.2343	0.2403
4.6	0.0734	0.1859	0.1566	0.0646	0.2342	0.3611	0.1057	0.2137	0.1526	0.4785	0.1348	0.3073	0.1789	0.1941	0.2479	0.2061	0.0663	0.002	0.273	0.0312	-0.1035	0.3292	0.243	0.3274	0.0616	0.312	0.1112	0.1549	0.2993	0.2411	0.2161	0.3332	0.3968	0.2632	0.1542	0.2943	0.1611	0.0201	0.2377	0.0036	0.0561	0.3519	0.1085	-0.1063	-0.1243	-0.0865	0.2561	0.2372	0.248
4.63333	0.0687	0.1724	0.1674	0.0585	0.2439	0.3471	0.1039	0.2047	0.1602	0.4775	0.1382	0.3033	0.1826	0.1835	0.2457	0.206	0.074	-0.0055	0.2504	0.0486	-0.1039	0.3266	0.2323	0.3224	0.0628	0.3229	0.1371	0.1734	0.2932	0.2442	0.2089	0.324	0.3834	0.2666	0.1497	0.3011	0.1634	0.0139	0.2219	-0.0178	0.0702	0.356	0.1185	-0.1069	-0.138	-0.0931	0.2522	0.2393	0.2557
4.66667	0.0587	0.1668	0.1906	0.0476	0.2621	0.3425	0.0979	0.2107	0.1598	0.4882	0.1462	0.2981	0.1734	0.1868	0.2542	0.2006	0.0848	-0.0071	0.2214	0.0718	-0.0997	0.3201	0.2306	0.3177	0.1013	0.3246	0.1426	0.1807	0.3053	0.247	0.2055	0.3181	0.3735	0.2576	0.1556	0.3117	0.1583	0.0096	0.212	-0.04	0.0764	0.3504	0.1602	-0.1062	-0.1444	-0.1086	0.2523	0.24	0.2678
4.7	0.0407	0.1654	0.2081	0.0456	0.2685	0.3243	0.0624	0.2187	0.156	0.4975	0.1325	0.2779	0.1691	0.1849	0.2519	0.1983	0.0891	0.0041	0.2122	0.0835	-0.0856	0.3205	0.2268	0.3012	0.1193	0.3224	0.1379	0.1891	0.3194	0.2501	0.2048	0.3151	0.3729	0.2474	0.1627	0.3207	0.158	0.0082	0.2109	-0.0528	0.0766	0.3503	0.1765	-0.1014	-0.1425	-0.1173	0.2559	0.2435	0.2775
4.73333	0.0277	0.1544	0.2119	0.04	0.2751	0.3207	0.0452	0.2349	0.1519	0.4984	0.1285	0.2509	0.1751	0.1592	0.2467	0.1937	0.0849	0.0196	0.2174	0.0795	-0.0598	0.3234	0.2352	0.2846	0.1254	0.3368	0.1577	0.1877	0.3259	0.2468	0.2054	0.3139	0.3712	0.2411	0.1667	0.33	0.156	0.0071	0.2083	-0.0579	0.0795	0.3445	0.1754	-0.0968	-0.1399	-0.1291	0.2513	0.238	0.2851
4.76667	0.0138	0.1482	0.2133	0.0301	0.2814	0.3194	0.041	0.2511	0.1474	0.4917	0.1032	0.2437	0.1899	0.1508	0.24	0.1916	0.0821	0.0255	0.2256	0.0839	-0.0231	0.3207	0.2335	0.2773	0.1139	0.3448	0.1437	0.1999	0.339	0.2378	0.2052	0.3115	0.3714	0.2411	0.1687	0.3386	0.1501	-0.0057	0.2057	-0.0699	0.0788	0.3385	0.1688	-0.0909	-0.141	-0.1351	0.2536	0.2302	0.2983
4.8	0.009	0.1336	0.2123	0.0292	0.2918	0.3157	0.0246	0.254	0.1466	0.4828	0.0937	0.2234	0.1974	0.1536	0.2277	0.1926	0.0823	0.0224	0.2255	0.0777	0.0038	0.3151	0.2274	0.273	0.1241	0.3396	0.1642	0.2167	0.3492	0.2323	0.2032	0.3108	0.3651	0.237	0.172	0.3453	0.1485	-0.0215	0.2158	-0.0669	0.085	0.3309	0.1631	-0.0876	-0.1423	-0.1348	0.2492	0.2213	0.3074
4.83333	0.0065	0.1143	0.2123	0.0318	0.2919	0.3195	0.0191	0.2613	0.1472	0.4714	0.0743	0.2178	0.1995	0.1499	0.2181	0.1905	0.0712	0.0084	0.2052	0.0789	0.0253	0.3003	0.2244	0.2671	0.1242	0.3288	0.1589	0.2304	0.3496	0.2299	0.1935	0.2981	0.3653	0.2271	0.1732	0.3536	0.1462	-0.0304	0.2268	-0.0696	0.0881	0.3188	0.1455	-0.0819	-0.1446	-0.1322	0.2429	0.2257	0.3131
4.86667	-0.006	0.105	0.2056	0.0271	0.2983	0.3207	0.0204	0.2632	0.152	0.4583	0.0623	0.2182	0.2156	0.1479	0.203	0.1833	0.0559	0.006	0.1874	0.0765	0.0482	0.287	0.2379	0.2617	0.1332	0.3051	0.1813	0.2195	0.3494	0.2274	0.1826	0.3025	0.3542	0.2186	0.1665	0.3563	0.1489	-0.0369	0.2266	-0.0743	0.0912	0.3136	0.1356	-0.0763	-0.1443	-0.1284	0.2378	0.216	0.3287
4.9	-0.0136	0.1042	0.2026	0.0309	0.3149	0.3241	0.0029	0.2747	0.1421	0.4517	0.047	0.2128	0.2173	0.1362	0.1937	0.1885	0.0348	0.0137	0.1582	0.0773	0.0636	0.2663	0.2459	0.2724	0.1236	0.289	0.1679	0.209	0.3409	0.2168	0.1819	0.2961	0.3565	0.2107	0.1615	0.3556	0.1478	-0.041	0.2145	-0.0753	0.1052	0.3106	0.1305	-0.0718	-0.1403	-0.1305	0.2359	0.2142	0.3387
4.93333	-0.0125	0.0962	0.2017	0.0207	0.3318	0.3284	0.0052	0.2465	0.138	0.4407	0.0357	0.2101	0.2282	0.1687	0.185	0.1907	0.0154	0.0249	0.1562	0.0931	0.0787	0.219	0.2476	0.2726	0.1249	0.2741	0.1672	0.1951	0.3437	0.1934	0.1834	0.2864	0.3471	0.2023	0.16	0.3538	0.1426	-0.0445	0.2093	-0.0789	0.1173	0.3011	0.1441	-0.0688	-0.1318	-0.1347	0.2442	0.2309	0.3406
4.96667	-0.0213	0.0904	0.2035	0.0033	0.3397	0.3339	0.0004	0.2318	0.129	0.4344	0.0389	0.2126	0.233	0.1629	0.1842	0.1958	0.0083	0.0261	0.1531	0.0924	0.0801	0.1932	0.2394	0.2698	0.1289	0.2671	0.192	0.176	0.3322	0.1686	0.1783	0.2765	0.3363	0.1981	0.1578	0.3494	0.1419	-0.05	0.1937	-0.076	0.1184	0.28	0.1635	-0.0679	-0.1229	-0.1317	0.2519	0.2323	0.3392
5	-0.0255	0.0934	0.2094	0.0076	0.3552	0.3385	0.0018	0.2258	0.1288	0.431	0.0392	0.209	0.2303	0.1457	0.1804	0.1989	0.0015	0.0487	0.1554	0.1034	0.0791	0.1627	0.2288	0.2656	0.1117	0.2693	0.1927	0.1709	0.3162	0.1581	0.1708	0.2698	0.336	0.1911	0.1604	0.3429	0.1384	-0.0581	0.1811	-0.0778	0.1255	0.2602	0.171	-0.0658	-0.1157	-0.1298	0.2454	0.2326	0.3382
5.0333	-0.0272	0.089	0.2117	-0.0257	0.3532	0.3431	0.0045	0.2151	0.1165	0.4233	0.0589	0.2027	0.224	0.1495	0.1718	0.1978	0.0084	0.0747	0.1438	0.1229	0.0744	0.1426	0.2246	0.2595	0.1044	0.2625	0.1941	0.1773	0.331	0.1409	0.1724	0.2531	0.3359	0.1874	0.1589	0.3399	0.1323	-0.0694	0.1714	-0.0823	0.135	0.2412	0.1721	-0.0616	-0.1082	-0.1344	0.2369	0.2413	0.3341
5.0667	-0.0254	0.0811	0.2213	-0.0255	0.3409	0.3371	0.0126	0.2014	0.1005	0.4002	0.0648	0.2	0.2213	0.1657	0.1722	0.1964	0.0131	0.0765	0.1114	0.1337	0.0632	0.1159	0.2189	0.2567	0.1009	0.2656	0.1861	0.1697	0.3419	0.1252	0.1773	0.2378	0.3416	0.1832	0.1565	0.337	0.1295	-0.0763	0.1649	-0.0866	0.1378	0.2393	0.1763	-0.0572	-0.1036	-0.1419	0.2184	0.2418	0.3366
5.1	-0.0254	0.041	0.2263	-0.0523	0.3229	0.3302	0.0219	0.1933	0.0917	0.3785	0.063	0.2004	0.2074	0.1904	0.1592	0.1985	0.0213	0.0897	0.0747	0.1355	0.0721	0.0808	0.2274	0.27	0.0897	0.263	0.1808	0.1738	0.3514	0.1207	0.1774	0.2318	0.3452	0.186	0.1506	0.3323	0.1316	-0.0777	0.1569	-0.0856	0.1264	0.238	0.1819	-0.048	-0.095	-0.1387	0.201	0.2408	0.3304
5.1333	-0.0155	0.0303	0.2388	-0.0841	0.3208	0.3163	0.0379	0.2079	0.0802	0.3643	0.0608	0.2123	0.1954	0.2124	0.1514	0.2	0.0286	0.0874	0.0628	0.1391	0.0775	0.0587	0.2318	0.2826	0.0705	0.2731	0.1681	0.1743	0.3592	0.1241	0.1708	0.2248	0.3393	0.193	0.1575	0.3227	0.1276	-0.0813	0.1493	-0.0888	0.104	0.2361	0.1848	-0.036	-0.0906	-0.1448	0.1984	0.2401	0.3217
5.1667	-0.0144	0.0182	0.2379	-0.0976	0.317	0.3055	0.0505	0.2255	0.0707	0.3468	0.0717	0.2275	0.2054	0.2231	0.1531	0.2036	0.0342	0.0914	0.0588	0.1434	0.0744	0.0448	0.2601	0.2951	0.0641	0.2865	0.1627	0.1652	0.3476	0.1402	0.1722	0.2208	0.3378	0.1935	0.1551	0.3236	0.1283	-0.0791	0.1504	-0.0938	0.0957	0.2335	0.1873	-0.0336	-0.0877	-0.1447	0.1988	0.2452	0.3108
5.2	-0.0187	0.011	0.2362	-0.1424	0.3274	0.2958	0.0525	0.2325	0.0632	0.3402	0.084	0.2271	0.2074	0.226	0.1573	0.2032	0.0308	0.0898	0.0581	0.1563	0.078	0.0326	0.266	0.2899	0.0608	0.2949	0.1638	0.162	0.3339	0.1553	0.1697	0.2136	0.335	0.1922	0.154	0.3153	0.1252	-0.0801	0.1426	-0.1056	0.1059	0.2274	0.1938	-0.0346	-0.0871	-0.1379	0.1766	0.2507	0.2865
5.2333	-0.0229	0.011	0.2215	-0.1484	0.3533	0.2878	0.0665	0.2503	0.0569	0.3384	0.0822	0.2293	0.1915	0.2179	0.1666	0.2108	0.0331	0.0731	0.0481	0.1468	0.06	0.005	0.2683	0.2897	0.0706	0.2819	0.179	0.1616	0.3204	0.1802	0.1661	0.2063	0.3225	0.1944	0.1542	0.3111	0.1268	-0.0827	0.1534	-0.1223	0.1064	0.226	0.2054	-0.0265	-0.087	-0.1325	0.167	0.2579	0.271
5.2667	-0.0246	0.0141	0.1918	-0.1537	0.3583	0.277	0.0778	0.2617	0.0593	0.3416	0.0605	0.2313	0.1824	0.2157	0.1762	0.2125	0.0262	0.0476	0.0455	0.1414	0.0756	-0.0107	0.2584	0.2811	0.0765	0.2744	0.1848	0.1604	0.3071	0.1852	0.1634	0.1888	0.3255	0.2018	0.1507	0.3079	0.1277	-0.0838	0.1699	-0.1358	0.1157	0.2266	0.1963	-0.0101	-0.0946	-0.1402	0.1595	0.2629	0.2611
5.3	-0.0197	0.0175	0.1669	-0.1655	0.3652	0.2728	0.0774	0.2676	0.0636	0.3552	0.0414	0.2358	0.1641	0.2093	0.1797	0.2147	0.014	0.045	0.0476	0.1507	0.0936	-0.0257	0.2628	0.271	0.0741	0.2579	0.194	0.162	0.2944	0.2101	0.16	0.1834	0.3266	0.2078	0.143	0.3051	0.1265	-0.0804	0.1888	-0.1424	0.1182	0.2283	0.2012	0.0092	-0.103	-0.1614	0.1571	0.2591	0.2552
5.3333	-0.0223	0.0284	0.1546	-0.1777	0.3546	0.2742	0.0811	0.2691	0.0744	0.3675	0.0302	0.2427	0.1665	0.2088	0.184	0.2228	0.0121	0.0297	0.0662	0.1482	0.1098	-0.0402	0.2675	0.2605	0.0664	0.2496	0.1928	0.169	0.2693	0.2409	0.1562	0.1715	0.3201	0.2113	0.1391	0.3136	0.1273	-0.084	0.2126	-0.1539	0.1192	0.2246	0.2018	0.0259	-0.1062	-0.1716	0.1582	0.2528	0.2536
5.3667	-0.0181	0.0498	0.1382	-0.1881	0.3448	0.2806	0.0817	0.2544	0.0707	0.3777	0.0175	0.2343	0.1587	0.2107	0.1907	0.2325	0.0079	0.0334	0.0698	0.1368	0.1283	-0.048	0.2797	0.2544	0.0531	0.2443	0.1862	0.1763	0.2548	0.2391	0.1513	0.1758	0.3181	0.211	0.1364	0.3096	0.1332	-0.0887	0.2316	-0.1555	0.1286	0.2273	0.2044	0.0305	-0.1072	-0.1658	0.1567	0.2427	0.2486
5.4	-0.0143	0.08	0.1422	-0.2001	0.3226	0.2767	0.0762	0.2488	0.0685	0.3848	0.0094	0.2172	0.1613	0.2007	0.189	0.2364	0.0003	0.0322	0.072	0.1311	0.142	-0.054	0.298	0.2367	0.0549	0.2343	0.1778	0.1786	0.2488	0.2495	0.1482	0.1752	0.3181	0.2177	0.1374	0.299	0.1386	-0.0972	0.234	-0.1562	0.1302	0.2322	0.2136	0.0252	-0.096	-0.169	0.1599	0.2341	0.257
5.4333	-0.0062	0.0694	0.1219	-0.2144	0.3039	0.2669	0.0676	0.1992	0.0692	0.3894	0.0194	0.2204	0.1597	0.1938	0.1862	0.2329	0.0075	0.0219	0.0832	0.1489	0.147	-0.062	0.3015	0.2345	0.0636	0.2168	0.1784	0.1753	0.2454	0.2599	0.1433	0.1853	0.3158	0.232	0.136	0.2966	0.1413	-0.099	0.2242	-0.1444	0.1226	0.2354	0.2114	0.0144	-0.0873	-0.1753	0.1538	0.2303	0.262
5.4667	-0.0012	0.0661	0.1238	-0.2118	0.2995	0.2699	0.053	0.1889	0.0636	0.3874	0.0269	0.2369	0.1585	0.19	0.1833	0.2219	-0.0168	0.0194	0.1063	0.1651	0.1516	-0.066	0.2963	0.239	0.0751	0.223	0.1743	0.1611	0.2451	0.2652	0.139	0.1919	0.3106	0.237	0.1302	0.2947	0.1468	-0.0958	0.2193	-0.1331	0.1271	0.2297	0.2007	-0.0047	-0.0829	-0.176	0.149	0.222	0.2662
5.5	0.0027	0.0746	0.1234	-0.2229	0.2978	0.2818	0.0409	0.1803	0.0549	0.3842	0.0274	0.249	0.1622	0.1861	0.1702	0.2158	-0.0431	0.007	0.1215	0.1634	0.1472	-0.0681	0.282	0.2436	0.0545	0.2235	0.173	0.1731	0.2299	0.2567	0.1337	0.1989	0.309	0.2402	0.1253	0.2941	0.1551	-0.0832	0.2105	-0.1197	0.125	0.2187	0.1962	-0.0115	-0.0842	-0.1771	0.1397	0.2125	0.2669
5.5333	0.0019	0.0791	0.1271	-0.2357	0.29	0.2931	0.0339	0.1706	0.0443	0.3813	0.0369	0.251	0.1622	0.1874	0.1612	0.2086	-0.0536	-0.0027	0.1192	0.1716	0.1424	-0.0776	0.2608	0.255	0.0446	0.2178	0.1709	0.1703	0.2365	0.2614	0.1344	0.1997	0.3046	0.2416	0.1166	0.2976	0.1592	-0.0794	0.196	-0.1091	0.1359	0.2012	0.1898	-0.0222	-0.0856	-0.1843	0.1357	0.2069	0.2683
5.5667	0.0032	0.0763	0.1265	-0.255	0.2787	0.277	0.0233	0.1727	0.0207	0.3755	0.0412	0.2529	0.1491	0.1957	0.152	0.2109	-0.0456	-0.0083	0.1706	0.1788	0.1371	-0.09	0.2467	0.2782	0.0461	0.2157	0.1743	0.1691	0.243	0.2794	0.1403	0.1955	0.297	0.2419	0.1064	0.3001	0.1668	-0.071	0.1886	-0.0975	0.1542	0.1833	0.1812	-0.0281	-0.0873	-0.1918	0.1269	0.1919	0.2643
5.6	0.0013	0.0944	0.1252	-0.257	0.2634	0.2579	0.0159	0.1682	0.0093	0.3725	0.0504	0.2547	0.1195	0.1969	0.1331	0.2196	-0.0388	-0.0104	0.1728	0.193	0.1224	-0.1007	0.2419	0.2962	0.0548	0.2124	0.1733	0.1582	0.2485	0.2896	0.1413	0.182	0.2877	0.2449	0.0996	0.2992	0.1718	-0.0592	0.1782	-0.0847	0.1684	0.1883	0.1839	-0.0377	-0.0832	-0.1957	0.1298	0.1729	0.2446
5.6333	-0.0014	0.0878	0.1197	-0.2567	0.2558	0.2432	0.0235	0.1736	0.0021	0.3682	0.047	0.2646	0.1207	0.1881	0.1179	0.2219	-0.029	-0.0131	0.1816	0.2041	0.1032	-0.1019	0.2569	0.2994	0.0511	0.2005	0.1774	0.1605	0.2393	0.2914	0.1281	0.1729	0.2813	0.2438	0.09	0.2962	0.1774	-0.0587	0.1763	-0.084	0.1736	0.1879	0.1954	-0.0402	-0.077	-0.203	0.1444	0.1685	0.2272
5.6667	0.0004	0.0919	0.1314	-0.2495	0.2576	0.2348	0.0268	0.1828	0.0027	0.3565	0.0347	0.2747	0.1142	0.1785	0.1028	0.2156	-0.0183	-0.0141	0.181	0.1959	0.0977	-0.0995	0.2727	0.2968	0.0459	0.1888	0.1743	0.1786	0.2084	0.284	0.1249	0.1625	0.2742	0.2397	0.0768	0.2869	0.182	-0.0622	0.1731	-0.0941	0.1648	0.1899	0.1944	-0.0501	-0.0602	-0.2078	0.1562	0.1531	0.2098
5.7	0.0017	0.1092	0.1245	-0.2405	0.2519	0.2209	0.0358	0.1846	0.002	0.3466	0.0348	0.2756	0.1064	0.1747	0.0923	0.2039	-0.0052	-0.0167	0.196	0.2032	0.0875	-0.0986	0.2826	0.3022	0.0526	0.1687	0.1758	0.183	0.1895	0.2838	0.1256	0.1606	0.2713	0.2277	0.0686	0.2851	0.1856	-0.0608	0.1787	-0.0941	0.1572	0.1925	0.2022	-0.0618	-0.0638	-0.2116	0.1703	0.1478	0.2051
5.7333	-0.0003	0.0923	0.1219	-0.2167	0.252	0.2182	0.0397	0.178	-0.0032	0.3452	0.0252	0.2656	0.0976	0.174	0.0878	0.199	0.0029	-0.0215	0.2169	0.2216	0.0897	-0.1002	0.2493	0.306	0.0503	0.1639	0.1809	0.1783	0.19	0.2778	0.1239	0.1584	0.2669	0.2182	0.0565	0.2851	0.1903	-0.0554	0.1748	-0.102	0.1491	0.1953	0.2185	-0.0733	-0.0364	-0.2169	0.1662	0.1432	0.2095
5.7667	-0.0125	0.0976	0.1168	-0.203	0.2408	0.2178	0.0349	0.1651	-0.0076	0.343	0.0024	0.2478	0.1079	0.1694	0.092	0.1898	0.0101	-0.0242	0.2267	0.2143	0.0799	-0.0939	0.2366	0.3059	0.0554	0.1621	0.1909	0.1807	0.177	0.2721	0.1239	0.1623	0.2656	0.212	0.0416	0.2758	0.1917	-0.0538	0.1771	-0.1056	0.1496	0.1903	0.2345	-0.0836	-0.0246	-0.217	0.1719	0.1298	0.2201
5.8	-0.0173	0.1185	0.1185	-0.2039	0.2326	0.2022	0.0244	0.1688	-0.0087	0.335	-0.0096	0.2437	0.1074	0.1632	0.0946	0.1816	0.0166	-0.0257	0.2346	0.1972	0.1134	-0.0952	0.2199	0.2876	0.0591	0.1587	0.202	0.1902	0.1674	0.2659	0.1228	0.165	0.2678	0.2066	0.0341	0.2751	0.1913	-0.0538	0.1744	-0.1004	0.1533	0.1944	0.2397	-0.0852	-0.0208	-0.213	0.1708	0.1239	0.2356
5.8333	-0.0196	0.1174	0.1274	-0.1947	0.2197	0.1748	0.0168	0.1659	-0.0077	0.328	-0.0139	0.2399	0.1279	0.1795	0.0927	0.1794	0.0221	-0.0158	0.2235	0.1904	0.1173	-0.0956	0.1733	0.267	0.0595	0.1695	0.2083	0.1885	0.1535	0.2706	0.121	0.1629	0.2697	0.2056	0.028	0.2721	0.1897	-0.0455	0.1659	-0.1049	0.1616	0.1976	0.2441	-0.0931	-0.0206	-0.2031	0.1675	0.1177	0.2435
5.8667	-0.0183	0.1125	0.1247	-0.1691	0.2127	0.1517	0.0184	0.1684	-0.012	0.324	-0.0229	0.2421	0.1271	0.1658	0.0763	0.174	0.039	-0.0081	0.2214	0.1764	0.1049	-0.0909	0.1637	0.2568	0.0571	0.1305	0.2129	0.1933	0.1216	0.2594	0.1195	0.1645	0.2769	0.2033	0.03	0.2755	0.187	-0.0507	0.1559	-0.1109	0.1736	0.2013	0.246	-0.1031	-0.0211	-0.1955	0.1646	0.124	0.2405
5.9	-0.0203	0.1098	0.1353	-0.1461	0.2114	0.1357	0.0115	0.1693	-0.0127	0.3253	-0.0349	0.2382	0.1245	0.1494	0.0664	0.1751	0.0496	0.0008	0.2207	0.1721	0.1236	-0.1027	0.1609	0.255	0.0554	0.0979	0.2168	0.2039	0.1071	0.2677	0.1164	0.165	0.2925	0.2017	0.031	0.2684	0.1915	-0.0518	0.1546	-0.1074	0.1846	0.1979	0.2433	-0.1086	-0.024	-0.1928	0.1629	0.1264	0.2446
5.9333	-0.0256	0.1072	0.1507	-0.1336	0.2127	0.1181	0.0041	0.167	-0.0166	0.3264	-0.0422	0.2337	0.1185	0.1398	0.0518	0.1804	0.0532	0.0007	0.2068	0.1651	0.1318	-0.1157	0.136	0.2565	0.0585	0.0977	0.2183	0.2128	0.0865	0.2751	0.1123	0.1579	0.3131	0.198	0.0275	0.2608	0.1973	-0.0524	0.1627	-0.1091	0.1974	0.1915	0.236	-0.1221	-0.0311	-0.1933	0.158	0.1337	0.2293
5.9667	-0.0263	0.1026	0.1782	-0.1286	0.2243	0.1128	-0.0011	0.1552	-0.0314	0.3278	-0.0546	0.2369	0.1062	0.1379	0.0442	0.1834	0.0176	-0.0004	0.1946	0.1634	0.1499	-0.1377	0.1281	0.2544	0.0689	0.1	0.2075	0.2279	0.0709	0.2755	0.1111	0.1546	0.3013	0.1974	0.0296	0.2557	0.1959	-0.0521	0.1597	-0.1051	0.2059	0.1893	0.2322	-0.1339	-0.0396	-0.1958	0.1481	0.1374	0.2555
6	-0.0279	0.0952	0.1938	-0.1265	0.2233	0.1143	0.0054	0.1544	-0.0406	0.327	-0.0743	0.2256	0.1012	0.1414	0.0295	0.1839	0.0144	0.0073	0.1723	0.1492	0.143	-0.1518	0.1552	0.2447	0.0814	0.0899	0.2004	0.2379	0.0644	0.2253	0.1051	0.1516	0.2976	0.1991	0.0264	0.254	0.1928	-0.0523	0.1562	-0.1284	0.2023	0.1841	0.2305	-0.1405	-0.0536	-0.2016	0.1371	0.1347	0.2649
6.0333	-0.0299	0.0925	0.2062	-0.1354	0.2183	0.1145	0.0148	0.1557	-0.0501	0.323	-0.0695	0.2108	0.099	0.1455	0.021	0.1842	0.0184	0.0132	0.1393	0.1453	0.1521	-0.1566	0.1705	0.2387	0.0844	0.0885	0.2007	0.2364	0.0648	0.2112	0.1026	0.1566	0.3077	0.1893	0.0235	0.2488	0.1956	-0.0517	0.1488	-0.127	0.1978	0.1751	0.2245	-0.1472	-0.0694	-0.2171	0.1385	0.131	0.2727
6.0667	-0.036	0.0902	0.2213	-0.1342	0.2138	0.1193	0.0163	0.1563	-0.0585	0.3221	-0.0635	0.1998	0.1048	0.1523	0.0102	0.1873	-0.0002	0.0126	0.1303	0.139	0.1447	-0.1593	0.1887	0.234	0.0902	0.0777	0.2015	0.2424	0.0331	0.1866	0.1012	0.1658	0.3084	0.1904	0.0241	0.2495	0.1922	-0.0517	0.1416	-0.1379	0.1883	0.1639	0.2139	-0.1525	-0.0705	-0.2259	0.1355	0.1096	0.2795
6.1	-0.0329	0.094	0.2438	-0.136	0.2045	0.1246	0.0154	0.156	-0.059	0.3282	-0.0686	0.1882	0.093	0.1421	0.0126	0.1847	0.0016	0.0027	0.1465	0.1434	0.1426	-0.1683	0.1898	0.2341	0.0881	0.072	0.1955	0.2421	0.0238	0.1529	0.1006	0.166	0.3082	0.187	0.0208	0.2539	0.1917	-0.047	0.1276	-0.1531	0.1648	0.157	0.1985	-0.1548	-0.0803	-0.2386	0.1342	0.0876	0.2833
6.1333	-0.03	0.091	0.2599	-0.138	0.1712	0.1295	0.012	0.1543	-0.0683	0.335	-0.0373	0.1784	0.0861	0.1462	0.0129	0.1833	0.0076	-0.0117	0.1504	0.1345	0.163	-0.1593	0.1916	0.2238	0.0796	0.0769	0.1854	0.2255	0.0213	0.1008	0.0988	0.1598	0.3203	0.1939	0.0156	0.2499	0.1898	-0.0535	0.1215	-0.1707	0.1449	0.1588	0.1801	-0.1549	-0.0839	-0.2554	0.1407	0.0632	0.289
6.1667	-0.0301	0.0754	0.2642	-0.1474	0.1591	0.1401	0.0111	0.1494	-0.0744	0.3438	-0.0161	0.172	0.0987	0.1526	0.0156	0.1786	0.0073	-0.0393	0.1732	0.1212	0.1679	-0.1556	0.1999	0.2292	0.0642	0.0745	0.1837	0.2262	0.0239	0.0612	0.0949	0.1586	0.3131	0.2001	0.0143	0.2453	0.188	-0.053	0.1051	-0.1867	0.1292	0.1643	0.1596	-0.1498	-0.0929	-0.2672	0.1415	0.0401	0.2919
6.2	-0.0137	0.0689	0.2641	-0.159	0.1396	0.1483	-0.003	0.1593	-0.0757	0.3407	0.0085	0.1657	0.1005	0.1491	0.0119	0.1837	0.0115	-0.0621	0.1934	0.1296	0.1718	-0.1619	0.1885	0.2333	0.0564	0.0577	0.1824	0.2226	0.02	0.0418	0.0932	0.1595	0.3174	0.204	0.021	0.2487	0.1878	-0.057	0.0801	-0.1953	0.1253	0.1716	0.142	-0.1587	-0.0978	-0.2913	0.1365	0.0209	0.2862
6.2333	-0.0053	0.0634	0.2473	-0.1762	0.1272	0.157	-0.0198	0.1661	-0.0757	0.3327	0.0231	0.1613	0.1087	0.1358	-0.0024	0.1903	-0.0068	-0.0774	0.2121	0.1146	0.1661	-0.1791	0.1892	0.2339	0.0547	0.0528	0.1862	0.2032	0.0242	0.0176	0.0915	0.1611	0.3088	0.2107	0.0236	0.2496	0.1919	-0.0583	0.0646	-0.1997	0.1227	0.1761	0.1159	-0.1622	-0.1008	-0.3078	0.1301	0.0074	0.2891
6.2667	0.0031	0.0618	0.2297	-0.1825	0.1292	0.1632	-0.0335	0.1679	-0.0718	0.3289	0.0438	0.149	0.1152	0.1139	-0.016	0.186	-0.0199	-0.0848	0.2237	0.1102	0.1588	-0.1918	0.1875	0.2232	0.059	0.0536	0.1883	0.17	0.0219	0.0089	0.0843	0.1654	0.3132	0.2135	0.0316	0.2406	0.193	-0.0567	0.0683	-0.2035	0.1198	0.1821	0.0977	-0.1651	-0.1001	-0.3152	0.1224	-0.0151	0.2927
6.3	0.0085	0.0429	0.2057	-0.1843	0.1276	0.1716	-0.0418	0.1669	-0.0669	0.321	0.0461	0.1469	0.1097	0.1026	-0.0237	0.1902	-0.0208	-0.0763	0.2291	0.0806	0.1587	-0.1864	0.1749	0.2115	0.0652	0.0658	0.1962	0.1435	0.0149	-0.0124	0.0899	0.1692	0.3036	0.2161	0.0391	0.2402	0.1955	-0.0566	0.0694	-0.2126	0.111	0.1951	0.0895	-0.1701	-0.1019	-0.3156	0.1198	-0.0364	0.2838
6.3333	0.007	0.0253	0.1979	-0.189	0.1261	0.1659	-0.048	0.1652	-0.0615	0.3097	0.0454	0.1318	0.1093	0.0998	-0.0221	0.2055	-0.0175	-0.0794	0.2226	0.0684	0.1528	-0.1877	0.1734	0.2055	0.0618	0.0566	0.2029	0.1263	0.0208	-0.0171	0.0843	0.1676	0.3046	0.2215	0.0475	0.2345	0.1958	-0.057	0.0756	-0.2162	0.1005	0.2074	0.0881	-0.168	-0.1077	-0.312	0.1174	-0.0456	0.2737
6.3667	0.0212	0.0138	0.1909	-0.1909	0.1215	0.1772	-0.0555	0.1723	-0.0475	0.2982	0.035	0.1279	0.107	0.1053	-0.0135	0.2146	-0.0051	-0.0837	0.2223	0.0281	0.1393	-0.2104	0.1648	0.1948	0.0652	0.0613	0.197	0.1289	0.0266	-0.0037	0.0777	0.1741	0.3019	0.2238	0.0446	0.2324	0.1939	-0.0502	0.0703	-0.2014	0.0894	0.2133	0.0886	-0.1659	-0.1162	-0.3102	0.1173	-0.0522	0.27
6.4	0.0322	-0.0013	0.1812	-0.1904	0.1175	0.1634	-0.0608	0.1643	-0.0391	0.2831	0.0066	0.1453	0.1126	0.1316	-0.0127	0.2255	0.0057	-0.0877	0.2157	0.0607	0.141	-0.2162	0.113	0.1851	0.0597	0.0756	0.1817	0.1342	0.0231	0.0132	0.0691	0.1727	0.3019	0.2261	0.0415	0.2259	0.1819	-0.0493	0.0647	-0.1897	0.089	0.2283	0.0913	-0.166	-0.1186	-0.3071	0.1129	-0.062	0.2677
6.4333	0.0383	-0.0092	0.1761	-0.2057	0.1107	0.1647	-0.0728	0.1507	-0.0332	0.2642	-0.014	0.1709	0.133	0.1396	-0.0023	0.2359	0.0124	-0.09	0.2075	0.0467	0.1374	-0.2161	0.1094	0.1771	0.0633	0.0984	0.1693	0.1348	0.032	0.0321	0.0667	0.1685	0.3017	0.2273	0.0446	0.2171	0.1667	-0.0445	0.0676	-0.1841	0.0943	0.2377	0.1091	-0.1618	-0.1203	-0.2996	0.1108	-0.072	0.2738
6.4667	0.0409	-0.0164	0.1753	-0.2098	0.1081	0.1704	-0.0847	0.131	-0.0312	0.2487	-0.0277	0.2023	0.1408	0.1412	0.0046	0.2545	0.0131	-0.0785	0.207	0.0608	0.1274	-0.2061	0.1062	0.165	0.0627	0.1071	0.1643	0.1286	0.0437	0.007	0.0616	0.1695	0.3019	0.2264	0.0465	0.2153	0.1651	-0.0432	0.0687	-0.1846	0.1025	0.2474	0.1129	-0.1541	-0.124	-0.2975	0.1053	-0.0699	0.2797
6.5	0.0449	-0.0079	0.1765	-0.2106	0.1036	0.1799	-0.1008	0.109	-0.0166	0.2387	-0.0383	0.224	0.1377	0.1327	0.0116	0.2531	0.0149	-0.0689	0.2129	0.0642	0.1035	-0.2029	0.1293	0.1641	0.0765	0.1024	0.1519	0.1238	0.0588	-0.0187	0.0564	0.1712	0.3161	0.2309	0.0484	0.212	0.1619	-0.035	0.0738	-0.1918	0.1083	0.2483	0.1206	-0.1509	-0.1281	-0.2972	0.1054	-0.0702	0.2809
6.5333	0.0469	-0.0122	0.166	-0.2124	0.1075	0.1644	-0.11	0.0946	-0.0102	0.2306	-0.0457	0.2299	0.1368	0.1274	0.0212	0.2339	0.0167	-0.0662	0.2006	0.0458	0.1047	-0.212	0.1123	0.1687	0.1006	0.0961	0.1433	0.1127	0.0716	-0.0494	0.0628	0.1727	0.3012	0.242	0.0483	0.2075	0.1625	-0.0367	0.0763	-0.1942	0.0975	0.2562	0.124	-0.1406	-0.1324	-0.2994	0.1083	-0.0789	0.2782
6.5667	0.0488	-0.0157	0.1597	-0.1962	0.1189	0.1854	-0.1194	0.074	-0.004	0.2263	-0.0513	0.2382	0.1408	0.1204	0.0255	0.2336	0.0251	-0.0571	0.1796	0.0352	0.1076	-0.2114	0.1017	0.176	0.1121	0.0945	0.132	0.1053	0.0741	-0.0519	0.0664	0.1793	0.3002	0.249	0.047	0.2019	0.165	-0.0283	0.078	-0.1986	0.0906	0.2568	0.1203	-0.1356	-0.1326	-0.2989	0.1111	-0.0696	0.2637
6.6	0.0407	-0.0181	0.1521	-0.1833	0.125	0.1769	-0.1352	0.0756	0.0034	0.2329	-0.0477	0.235	0.1446	0.1103	0.0322	0.2349	0.0259	-0.0586	0.1884	0.0205	0.0999	-0.2043	0.0995	0.1816	0.1131	0.1007	0.1163	0.0904	0.1006	-0.052	0.0718	0.1784	0.2973	0.2504	0.041	0.1986	0.1644	-0.0254	0.0675	-0.1923	0.0919	0.258	0.1213	-0.1346	-0.1316	-0.2972	0.1135	-0.0854	0.2468
6.6333	0.0284	-0.0157	0.139	-0.1805	0.1342	0.1664	-0.1397	0.0716	0.0195	0.2414	-0.0394	0.2363	0.1445	0.1116	0.0276	0.2397	0.0324	-0.0577	0.1831	0.0232	0.0908	-0.1976	0.0881	0.1847	0.114	0.0994	0.1021	0.0782	0.125	-0.0552	0.0731	0.172	0.2938	0.2508	0.0354	0.1971	0.1613	-0.0257	0.0861	-0.1779	0.0789	0.2656	0.1251	-0.1355	-0.1267	-0.2982	0.1375	-0.0934	0.2306
6.6667	0.0201	-0.0192	0.1304	-0.1763	0.1391	0.161	-0.1399	0.0471	0.0332	0.251	-0.0501	0.2346	0.1496	0.1155	0.0336	0.2451	0.0365	-0.047	0.1867	0.017	0.0776	-0.2007	0.073	0.1894	0.1081	0.1043	0.1021	0.067	0.1356	-0.0582	0.0783	0.1658	0.2944	0.2508	0.0366	0.2015	0.16	-0.0248	0.1064	-0.1711	0.0764	0.2716	0.1319	-0.138	-0.123	-0.2982	0.1612	-0.1074	0.2064
6.7	0.0104	-0.0093	0.1192	-0.1784	0.1415	0.1359	-0.1455	0.0251	0.051	0.2634	-0.0532	0.2349	0.1481	0.1146	0.0413	0.2574	0.0444	-0.0225	0.1851	0.0233	0.0617	-0.1898	0.0779	0.1932	0.0971	0.1061	0.0894	0.0642	0.15	-0.0611	0.0769	0.1678	0.3046	0.2464	0.0277	0.2045	0.154	-0.0292	0.1121	-0.1701	0.0878	0.2726	0.1414	-0.1417	-0.1263	-0.2958	0.1773	-0.11	0.1697
6.7333	0.002	0.0019	0.1108	-0.1756	0.1637	0.1317	-0.145	0.0354	0.0679	0.278	-0.0449	0.2177	0.1426	0.1214	0.0331	0.269	0.0481	-0.0162	0.207	0.0177	0.0475	-0.174	0.083	0.1936	0.0772	0.1101	0.0877	0.0656	0.1567	-0.075	0.0806	0.1629	0.296	0.2449	0.0286	0.2069	0.1503	-0.0321	0.091	-0.1756	0.0935	0.2708	0.148	-0.1364	-0.1306	-0.2879	0.1769	-0.1107	0.1406
6.7667	-0.0071	0.0088	0.0987	-0.177	0.1741	0.1291	-0.1415	0.0244	0.0817	0.2876	-0.0546	0.2027	0.131	0.11	0.0236	0.2777	0.0491	-0.0169	0.2024	0.0115	0.031	-0.1465	0.07	0.2095	0.0713	0.1177	0.1032	0.0492	0.167	-0.0746	0.0954	0.1622	0.2877	0.2437	0.0292	0.207	0.1455	-0.0366	0.0943	-0.1804	0.0987	0.2647	0.1597	-0.1364	-0.1332	-0.2833	0.1748	-0.1039	0.1157
6.8	-0.0099	0.0169	0.0842	-0.1747	0.1891	0.1461	-0.1421	0.0122	0.0915	0.2917	-0.0756	0.1933	0.1217	0.1047	0.0178	0.2933	0.0149	-0.0183	0.1759	0.0066	0.007	-0.1145	0.0593	0.2171	0.0487	0.1298	0.1115	0.0336	0.1707	-0.069	0.1032	0.1556	0.2901	0.2447	0.0269	0.208	0.1382	-0.0355	0.0963	-0.1955	0.1025	0.2624	0.1694	-0.1343	-0.131	-0.2845	0.1719	-0.1012	0.1023
6.8333	-0.0162	0.0281	0.0835	-0.1716	0.2058	0.1379	-0.1402	0.0011	0.1001	0.2959	-0.1094	0.2152	0.1259	0.1042	0.0162	0.3046	-0.0111	-0.0251	0.1591	0.0145	-0.0024	-0.0847	0.0631	0.2211	0.0281	0.1332	0.1271	0.0302	0.1925	-0.0535	0.1141	0.1447	0.2921	0.2466	0.0198	0.2094	0.134	-0.0377	0.1019	-0.2076	0.1178	0.263	0.1707	-0.1305	-0.1313	-0.2797	0.1676	-0.098	0.1016
6.8667	-0.0195	0.0409	0.0843	-0.1618	0.2104	0.1329	-0.1331	0.0072	0.105	0.2926	-0.1036	0.2173	0.1204	0.1004	0.0042	0.3125	-0.0198	-0.0225	0.1358	0.0151	-0.0238	-0.0727	0.0609	0.2364	0.0074	0.1338	0.1381	0.0101	0.1962	-0.0355	0.1283	0.1389	0.296	0.2455	0.0218	0.2084	0.1302	-0.0405	0.092	-0.2156	0.117	0.2613	0.1637	-0.1279	-0.1364	-0.2776	0.1556	-0.1005	0.0999
6.9	-0.0214	0.0363	0.0872	-0.1564	0.2131	0.1149	-0.1237	0.0157	0.1048	0.2902	-0.0823	0.1959	0.1262	0.0934	-0.015	0.3169	-0.0223	-0.0094	0.086	0.0081	-0.0434	-0.072	0.0645	0.2396	-0.0075	0.1302	0.142	0.0098	0.2091	-0.0338	0.1529	0.1369	0.3013	0.2469	0.0304	0.2073	0.1271	-0.0506	0.0722	-0.2116	0.1257	0.2563	0.1579	-0.1314	-0.1348	-0.2779	0.1192	-0.1082	0.0966
6.9333	-0.0154	0.0425	0.0906	-0.1593	0.2115	0.106	-0.1117	0.028	0.1082	0.2916	-0.0538	0.1815	0.1083	0.0702	-0.0042	0.3131	-0.022	-0.0059	0.0883	-0.0099	-0.0565	-0.0685	0.0756	0.2288	-0.029	0.1367	0.1341	0.0101	0.2286	-0.009	0.162	0.129	0.3029	0.2553	0.0431	0.2082	0.129	-0.0454	0.0624	-0.2025	0.1343	0.241	0.1468	-0.1395	-0.1398	-0.2809	0.1041	-0.1156	0.0981
6.9667	-0.0114	0.0459	0.0853	-0.1703	0.2253	0.1058	-0.1046	0.0288	0.1198	0.2934	-0.0303	0.1755	0.1022	0.0729	0.0117	0.3165	-0.0107	-0.0105	0.0772	-0.0174	-0.0553	-0.0741	0.08	0.211	-0.0482	0.1421	0.1282	0.0098	0.2381	-0.0109	0.1756	0.1237	0.3118	0.2558	0.0517	0.2114	0.1281	-0.0527	0.0621	-0.1994	0.1394	0.2302	0.1396	-0.1462	-0.1368	-0.2796	0.087	-0.1266	0.0993
7	0.0018	0.0416	0.0782	-0.185	0.2339	0.1059	-0.0928	0.02	0.129	0.2982	-0.0465	0.1705	0.0978	0.0621	0.0208	0.321	0.0021	-0.0071	0.0784	-0.0035	-0.0802	-0.0657	0.08	0.195	-0.066	0.1258	0.1134	0.0065	0.2307	0.0288	0.1791	0.1232	0.3184	0.259	0.0584	0.2117	0.126	-0.044	0.0592	-0.1928	0.1431	0.2183	0.1382	-0.1535	-0.144	-0.2757	0.0638	-0.1429	0.1011
7.0333	0.0084	0.0352	0.0599	-0.1878	0.2319	0.1174	-0.0761	-0.0024	0.1305	0.3017	-0.0699	0.1762	0.1093	0.0741	0.0304	0.3301	0.0069	-0.0073	0.0744	0.0046	-0.1032	-0.0708	0.1002	0.1777	-0.0644	0.123	0.1066	-0.0075	0.2228	-0.0053	0.1816	0.1294	0.3171	0.2576	0.0583	0.2199	0.1255	-0.0541	0.0507	-0.192	0.15	0.2075	0.1365	-0.1627	-0.143	-0.2704	0.0547	-0.1447	0.1067
7.0667	0.0151	0.033	0.0449	-0.194	0.2259	0.0951	-0.0775	-0.0219	0.1242	0.3049	-0.1031	0.1722	0.1145	0.073	0.0468	0.334	0.0206	-0.018	0.0491	0.0142	-0.1072	-0.0766	0.1074	0.1707	-0.0647	0.1227	0.0966	0.0047	0.2103	-0.0109	0.1893	0.1262	0.3098	0.2589	0.0606	0.2209	0.1277	-0.0578	0.0343	-0.1834	0.1471	0.2051	0.1429	-0.1658	-0.1327	-0.2686	0.0419	-0.1484	0.1163
7.1	0.0238	0.0221	0.0373	-0.1856	0.2206	0.0878	-0.0848	-0.0346	0.1189	0.3098	-0.1303	0.1582	0.1228	0.058	0.0358	0.3355	0.0312	-0.0187	0.0193	0.0234	-0.1144	-0.0841	0.104	0.1768	-0.0772	0.119	0.1028	0.0288	0.2079	-0.0174	0.1973	0.1235	0.3205	0.254	0.0643	0.22	0.1229	-0.0582	0.0159	-0.1732	0.1404	0.2024	0.1326	-0.1676	-0.1253	-0.273	0.0297	-0.1512	0.1207
7.1333	0.0311	0.0082	0.0399	-0.1908	0.2213	0.0751	-0.0933	-0.0359	0.1184	0.3063	-0.1567	0.1415	0.1353	0.071	0.0167	0.333	0.0336	-0.0248	-0.0152	0.0359	-0.1203	-0.0788	0.1004	0.1888	-0.0832	0.1144	0.1066	0.0544	0.204	-0.027	0.2063	0.1228	0.3153	0.2475	0.0733	0.2154	0.1215	-0.0609	0.0214	-0.1527	0.1253	0.2085	0.1349	-0.1654	-0.1186	-0.2751	0.0262	-0.1547	0.1148
7.1667	0.0384	0.0021	0.0312	-0.1906	0.224	0.0709	-0.1068	-0.0244	0.1187	0.3056	-0.1696	0.1292	0.1418	0.0692	0.0088	0.3341	0.0504	-0.0336	-0.0386	0.0461	-0.1202	-0.0751	0.0918	0.1995	-0.0779	0.1171	0.1187	0.0717	0.1929	-0.0294	0.1985	0.1147	0.3166	0.242	0.0815	0.2092	0.1218	-0.0549	0.0296	-0.1377	0.116	0.2087	0.1329	-0.1582	-0.1099	-0.2839	0.039	-0.1555	0.1019
7.2	0.0473	0.0025	0.0209	-0.1852	0.2102	0.0531	-0.1123	-0.0258	0.1205	0.2947	-0.1875	0.1111	0.155	0.0704	-0.0044	0.332	0.0535	-0.0337	-0.0579	0.0546	-0.1037	-0.0732	0.0861	0.2184	-0.0673	0.1054	0.1018	0.0961	0.1898	-0.0462	0.1994	0.1104	0.3171	0.2381	0.0904	0.2068	0.1216	-0.0503	0.0246	-0.1323	0.1098	0.1995	0.1353	-0.1569	-0.0999	-0.2855	0.0394	-0.1564	0.0885
7.2333	0.0577	0.0014	0.0133	-0.1746	0.1909	0.0365	-0.1154	-0.0209	0.126	0.2845	-0.2136	0.1151	0.1524	0.0647	0.0074	0.3195	0.06	-0.0436	-0.0734	0.0746	-0.0966	-0.0762	0.0634	0.2249	-0.0598	0.1081	0.077	0.0863	0.1912	-0.0534	0.2018	0.1102	0.3155	0.232	0.0917	0.1961	0.1163	-0.0545	0.0149	-0.1375	0.1053	0.1983	0.1423	-0.1548	-0.0866	-0.2842	0.042	-0.152	0.0752
7.2667	0.0655	-0.0075	0.0184	-0.1587	0.1902	0.0384	-0.1236	-0.0149	0.1376	0.2767	-0.2327	0.1365	0.1627	0.0541	0.0003	0.3189	0.0701	-0.0415	-0.0813	0.064	-0.0912	-0.0688	0.0518	0.2387	-0.0397	0.1134	0.0841	0.0856	0.1914	-0.0413	0.2072	0.1121	0.3138	0.2324	0.0934	0.1921	0.1121	-0.053	0.0234	-0.1389	0.1113	0.2011	0.1413	-0.1465	-0.0693	-0.2957	0.0383	-0.1533	0.0617
7.3	0.0691	-0.0131	0.0222	-0.1463	0.1906	0.0279	-0.1104	0.0036	0.1425	0.2758	-0.2478	0.1452	0.1668	0.067	0.0184	0.3141	0.0832	-0.0331	-0.0831	0.053	-0.1184	-0.0594	0.0452	0.2404	-0.0091	0.1284	0.0611	0.0879	0.1856	-0.0373	0.209	0.1166	0.3089	0.2256	0.1015	0.1896	0.1077	-0.0477	0.0226	-0.1486	0.1078	0.2027	0.1374	-0.1408	-0.0596	-0.2925	0.0398	-0.1511	0.0611
7.3333	0.0669	-0.0201	0.0288	-0.142	0.1966	0.0103	-0.1058	0.0091	0.1417	0.2812	-0.2566	0.152	0.1672	0.0627	0.0224	0.3036	0.0823	-0.0366	-0.0668	0.0523	-0.119	-0.0529	0.0449	0.2494	0.0405	0.14	0.0673	0.0875	0.2015	-0.0328	0.2123	0.1187	0.311	0.2271	0.0983	0.1835	0.0998	-0.054	0.0309	-0.1543	0.114	0.2012	0.1273	-0.1335	-0.0542	-0.2848	0.0404	-0.1459	0.0546
7.3667	0.0573	-0.0142	0.0679	-0.146	0.1985	-0.0091	-0.1	0.014	0.1415	0.2815	-0.262	0.1511	0.1642	0.0765	0.0197	0.2999	0.0876	-0.0404	-0.0762	0.0642	-0.0999	-0.0689	0.0219	0.276	0.0642	0.1386	0.0736	0.0814	0.211	-0.0396	0.2173	0.1226	0.3091	0.2293	0.0951	0.1769	0.0976	-0.0598	0.036	-0.1649	0.1112	0.2045	0.1196	-0.1178	-0.0449	-0.2842	0.0457	-0.1449	0.05
7.4	0.0584	-0.0055	0.0939	-0.1528	0.1924	-0.0285	-0.0997	0.0226	0.1404	0.2775	-0.2618	0.1265	0.1689	0.086	0.0235	0.3025	0.0905	-0.0525	-0.0657	0.074	-0.0867	-0.0844	0.0202	0.2785	0.1016	0.1554	0.072	0.0807	0.2342	-0.0621	0.222	0.1233	0.3002	0.2259	0.1019	0.1695	0.0934	-0.0703	0.0376	-0.1682	0.1024	0.2093	0.1135	-0.1098	-0.0394	-0.2849	0.0549	-0.1456	0.0378
7.4333	0.0611	0.0122	0.1216	-0.1549	0.1812	-0.0425	-0.0947	0.0393	0.1369	0.2754	-0.2543	0.1166	0.1671	0.1022	0.0191	0.3036	0.0864	-0.0572	-0.06	0.0771	-0.0889	-0.0961	0.0199	0.2855	0.1292	0.1607	0.0797	0.0738	0.2393	-0.0402	0.2224	0.1241	0.2916	0.2249	0.1132	0.1635	0.0831	-0.0744	0.0405	-0.1676	0.084	0.2097	0.1084	-0.1074	-0.0374	-0.3031	0.062	-0.151	0.037
7.4667	0.0578	0.0226	0.1106	-0.1637	0.167	-0.0508	-0.084	0.0433	0.13	0.2801	-0.2396	0.1115	0.1729	0.1152	0.0273	0.3086	0.0881	-0.0582	-0.0477	0.079	-0.0951	-0.1044	0.0246	0.28	0.1398	0.157	0.0765	0.0626	0.2431	-0.0394	0.2228	0.1197	0.2836	0.2252	0.1049	0.163	0.0765	-0.0818	0.034	-0.168	0.0714	0.1999	0.1145	-0.0976	-0.0366	-0.3086	0.0701	-0.1556	0.0405
7.5	0.0482	0.0293	0.112	-0.1698	0.1382	-0.0484	-0.074	0.054	0.1263	0.2854	-0.2223	0.1037	0.1774	0.1358	0.0426	0.3186	0.0834	-0.0499	-0.0385	0.0786	-0.0972	-0.1069	0.0511	0.2658	0.1463	0.1538	0.0734	0.0573	0.2414	-0.0617	0.2208	0.1166	0.2756	0.2147	0.0943	0.1608	0.0669	-0.0874	0.0353	-0.1436	0.0485	0.1931	0.128	-0.0943	-0.0333	-0.313	0.0871	-0.1586	0.0458
7.5333	0.0443	0.0334	0.1004	-0.1721	0.1264	-0.0511	-0.0432	0.0724	0.121	0.2934	-0.2216	0.0859	0.1864	0.1491	0.0547	0.3237	0.0728	-0.0437	-0.0365	0.0768	-0.0924	-0.1086	0.0581	0.2655	0.1507	0.1455	0.065	0.0588	0.2237	-0.0816	0.2088	0.1159	0.2655	0.1999	0.0883	0.155	0.0659	-0.0929	0.0372	-0.1499	0.0322	0.1881	0.1235	-0.0964	-0.0266	-0.318	0.0894	-0.1623	0.0513
7.5667	0.0387	0.0324	0.1036	-0.1631	0.1162	-0.0634	-0.0391	0.0713	0.1218	0.2985	-0.2183	0.0729	0.1923	0.1597	0.0691	0.3227	0.0574	-0.0435	-0.045	0.0555	-0.0895	-0.113	0.0537	0.2689	0.1354	0.1491	0.0696	0.0741	0.2067	-0.0934	0.2039	0.1126	0.2746	0.1928	0.0871	0.15	0.0703	-0.0924	0.0399	-0.1552	0.0289	0.1841	0.1175	-0.0976	-0.0231	-0.3158	0.0921	-0.1654	0.0431
7.6	0.031	0.0403	0.0941	-0.1632	0.0984	-0.0696	-0.0356	0.0884	0.124	0.3001	-0.2086	0.0928	0.2019	0.1652	0.0896	0.3131	0.0459	-0.0456	-0.0555	0.0452	-0.0865	-0.124	0.0497	0.2698	0.1355	0.1522	0.0755	0.0744	0.1981	-0.1076	0.1973	0.109	0.2897	0.189	0.0901	0.1437	0.0681	-0.0983	0.0407	-0.1639	0.0288	0.1788	0.1016	-0.0993	-0.0147	-0.3245	0.089	-0.1723	0.0414
7.6333	0.0264	0.0537	0.0976	-0.1842	0.0814	-0.0653	-0.0353	0.0915	0.1242	0.301	-0.1968	0.1055	0.1943	0.1666	0.1058	0.3077	0.0372	-0.0597	-0.0612	0.0557	-0.1012	-0.13	0.042	0.2633	0.1297	0.1565	0.0774	0.0971	0.1862	-0.1269	0.1903	0.1	0.2962	0.1793	0.088	0.1373	0.072	-0.0956	0.0364	-0.1627	0.0481	0.1694	0.0955	-0.0993	-0.0092	-0.3253	0.0791	-0.1806	0.0492
7.6667	0.0209	0.0555	0.0951	-0.19	0.0827	-0.0575	-0.0312	0.0905	0.1211	0.3104	-0.1738	0.1014	0.1859	0.1688	0.122	0.3235	0.0372	-0.0462	-0.081	0.0936	-0.1276	-0.1201	0.0314	0.262	0.1191	0.1655	0.0803	0.119	0.1975	-0.1403	0.181	0.0905	0.3	0.1798	0.0924	0.1311	0.0719	-0.0977	0.0292	-0.1604	0.0634	0.1515	0.0908	-0.1033	-0.0036	-0.3253	0.0537	-0.1881	0.0664
7.7	0.0169	0.0652	0.0969	-0.1979	0.1048	-0.0506	-0.0396	0.0878	0.1133	0.3162	-0.1597	0.1183	0.1879	0.1724	0.1361	0.321	0.0345	-0.0432	-0.0902	0.1086	-0.1545	-0.115	-0.0361	0.2585	0.1151	0.1611	0.0805	0.127	0.2196	-0.1535	0.1719	0.079	0.3006	0.1877	0.0982	0.1261	0.0715	-0.1001	0.0267	-0.1512	0.0637	0.1391	0.0793	-0.1047	-0.0021	-0.3219	0.0278	-0.1954	0.0652
7.7333	0.0049	0.0637	0.0963	-0.2205	0.1131	-0.0352	-0.0549	0.0921	0.1141	0.328	-0.1468	0.1293	0.1854	0.1665	0.1341	0.3165	0.0313	-0.0309	-0.0788	0.1169	-0.186	-0.0924	-0.0297	0.2583	0.1231	0.1487	0.0756	0.1394	0.2392	-0.1411	0.1702	0.0715	0.2909	0.1906	0.1029	0.1269	0.0778	-0.0964	0.0251	-0.1461	0.0784	0.1328	0.0581	-0.1022	-0.007	-0.3228	0.0119	-0.2002	0.0618
7.7667	-0.0114	0.069	0.0999	-0.244	0.1324	-0.0274	-0.0521	0.1015	0.1112	0.3399	-0.1396	0.1179	0.1847	0.1556	0.1483	0.3089	0.0265	-0.0335	-0.0791	0.1288	-0.1864	-0.0757	-0.0356	0.2441	0.1283	0.1319	0.0671	0.1589	0.2536	-0.1309	0.1682	0.0685	0.2904	0.1956	0.1118	0.1279	0.078	-0.0988	0.0183	-0.1445	0.0724	0.1237	0.0099	-0.0986	-0.0148	-0.3295	-0.0017	-0.2042	0.066
7.8	-0.0183	0.0839	0.1135	-0.2601	0.1568	-0.0192	-0.0487	0.0994	0.1152	0.3427	-0.1291	0.1273	0.1876	0.1428	0.1557	0.3101	0.029	-0.033	-0.0683	0.1272	-0.2076	-0.0605	-0.0333	0.2493	0.1158	0.1168	0.0588	0.1327	0.2622	-0.1253	0.164	0.0632	0.2806	0.2041	0.1172	0.1266	0.0827	-0.1049	0.015	-0.138	0.0753	0.1214	-0.0016	-0.1026	-0.0186	-0.3349	-0.0165	-0.208	0.0692
7.8333	-0.0275	0.0932	0.1241	-0.2739	0.1726	-0.0105	-0.0434	0.1017	0.1176	0.3459	-0.1364	0.1444	0.1924	0.1253	0.1648	0.2988	0.042	-0.0463	-0.0572	0.0965	-0.1971	-0.052	-0.0317	0.2534	0.1042	0.1059	0.0585	0.146	0.2642	-0.1053	0.1591	0.0565	0.2727	0.203	0.1167	0.1306	0.0833	-0.1076	0.0107	-0.126	0.1048	0.1146	-0.0023	-0.1131	-0.0208	-0.3395	-0.0211	-0.2149	0.075
7.8667	-0.0265	0.0864	0.1334	-0.2858	0.1966	-0.0048	-0.0372	0.1031	0.1171	0.3496	-0.1493	0.1612	0.1928	0.1225	0.1698	0.2778	0.0564	-0.0565	-0.0546	0.0715	-0.2152	-0.0518	-0.0123	0.2496	0.1025	0.1035	0.0656	0.1332	0.2676	-0.0841	0.1534	0.0515	0.275	0.1965	0.1185	0.1341	0.0884	-0.1126	0.0084	-0.1021	0.1034	0.1069	-0.0021	-0.1158	-0.0249	-0.3457	-0.0304	-0.2217	0.0764
7.9	-0.0286	0.0972	0.1296	-0.2892	0.2367	-0.0035	-0.0251	0.1059	0.1187	0.3517	-0.1526	0.1618	0.1958	0.1157	0.1697	0.2555	0.0761	-0.0479	-0.0665	0.065	-0.2302	-0.0329	0.0119	0.2527	0.0918	0.1077	0.0582	0.134	0.259	-0.0618	0.1548	0.0433	0.2727	0.1908	0.1142	0.1424	0.0899	-0.1145	0.0114	-0.0931	0.1154	0.1027	-0.0078	-0.1114	-0.0249	-0.3459	-0.0382	-0.2276	0.0833
7.9333	-0.0385	0.0912	0.1288	-0.2796	0.2706	-0.0042	-0.0087	0.1168	0.1149	0.3546	-0.1508	0.1719	0.1991	0.0935	0.1817	0.2465	0.0822	-0.0497	-0.071	0.0489	-0.2421	-0.0284	0.0253	0.2452	0.0813	0.1219	0.0554	0.1308	0.2553	-0.0853	0.1541	0.0397	0.281	0.178	0.1111	0.1526	0.0937	-0.1115	0.0051	-0.0805	0.1216	0.1074	-0.0134	-0.1099	-0.0299	-0.3501	-0.0366	-0.2318	0.0897
7.9667	-0.0483	0.0984	0.1339	-0.2707	0.2894	-0.0146	-0.0052	0.1178	0.1186	0.3557	-0.1405	0.1677	0.2006	0.0777	0.1835	0.2253	0.1069	-0.067	-0.0669	0.0342	-0.2564	-0.0185	0.012	0.2331	0.0795	0.1129	0.0436	0.1275	0.2581	-0.0174	0.1559	0.0417	0.2774	0.1675	0.1122	0.1558	0.0971	-0.1111	0.015	-0.0656	0.1211	0.1051	-0.0126	-0.1077	-0.0257	-0.3544	-0.0366	-0.2305	0.091
8	-0.0509	0.0973	0.1412	-0.2647	0.3036	-0.0298	-0.0015	0.1205	0.1249	0.3586	-0.1217	0.1602	0.1957	0.0684	0.1957	0.2275	0.1179	-0.0801	-0.0667	0.032	-0.2588	-0.0177	0.0125	0.2202	0.0853	0.1109	0.0364	0.1305	0.266	0.0053	0.1608	0.0445	0.2787	0.1604	0.1055	0.1592	0.1005	-0.1143	0.0142	-0.0471	0.1328	0.1005	-0.0111	-0.1016	-0.0259	-0.3553	-0.0233	-0.2254	0.0882
8.0333	-0.0458	0.0863	0.1592	-0.246	0.3118	-0.0303	0.0107	0.1194	0.1286	0.3586	-0.1084	0.1696	0.188	0.0571	0.1964	0.2245	0.1233	-0.0762	-0.0463	0.0333	-0.2497	-0.0197	0.0154	0.2083	0.091	0.1206	0.0398	0.1292	0.2697	0.0315	0.1545	0.0471	0.2765	0.1558	0.1038	0.1623	0.0982	-0.1154	-0.0006	-0.0229	0.1361	0.0981	-0.0123	-0.0979	-0.0333	-0.3573	-0.023	-0.2181	0.0784
8.0667	-0.0552	0.0685	0.1742	-0.2382	0.3167	-0.0332	0.0127	0.117	0.1248	0.3568	-0.1071	0.1716	0.185	0.0461	0.1897	0.2274	0.1182	-0.0668	-0.0227	0.0346	-0.2467	-0.0116	0.02	0.2001	0.1054	0.1288	0.0456	0.1303	0.2752	0.082	0.1579	0.0488	0.281	0.1451	0.1052	0.1563	0.1013	-0.1166	-0.01	-0.0147	0.1335	0.0909	-0.0121	-0.0942	-0.0388	-0.3651	-0.0279	-0.2124	0.0751
8.1	-0.0635	0.0472	0.1839	-0.227	0.3223	-0.0367	0.0234	0.1231	0.1249	0.3555	-0.0859	0.1621	0.167	0.0317	0.1909	0.2319	0.107	-0.0473	-0.0012	0.0338	-0.2481	-0.0018	-0.0036	0.2138	0.1172	0.1435	0.0494	0.1345	0.2866	0.1039	0.1679	0.0507	0.2722	0.147	0.0982	0.1527	0.1044	-0.1194	-0.0156	-0.013	0.111	0.0834	-0.0252	-0.0968	-0.0485	-0.3656	-0.0165	-0.214	0.0675
8.1333	-0.0668	0.0382	0.1935	-0.2224	0.3297	-0.0411	0.0353	0.1221	0.1241	0.3525	-0.0611	0.1602	0.1542	0.017	0.1939	0.2345	0.0918	-0.0458	0.0116	0.0349	-0.229	-0.0033	-0.0234	0.2206	0.1211	0.1436	0.0489	0.1286	0.279	0.1208	0.169	0.0501	0.2712	0.1534	0.0966	0.1597	0.1085	-0.1261	-0.0171	-0.0149	0.1074	0.0846	-0.0313	-0.1124	-0.0501	-0.372	-0.0088	-0.213	0.0673
8.1667	-0.0766	0.0398	0.1914	-0.2284	0.3305	-0.035	0.0547	0.1254	0.1252	0.3466	-0.0336	0.1445	0.1423	0.0038	0.1961	0.2334	0.0821	-0.0426	0.0164	0.0571	-0.2145	-0.0028	-0.0478	0.2183	0.1253	0.1418	0.0392	0.1272	0.2701	0.1126	0.1667	0.0488	0.2607	0.1579	0.0981	0.154	0.1116	-0.1306	-0.0176	-0.0046	0.1158	0.0897	-0.0361	-0.1139	-0.045	-0.3765	-0.0046	-0.2124	0.0711
8.2	-0.0803	0.0141	0.1929	-0.2286	0.327	-0.0312	0.0661	0.1268	0.1266	0.341	-0.0086	0.13	0.1334	-0.005	0.198	0.2255	0.0686	-0.0467	0.0262	0.0642	-0.2087	-0.0021	-0.0582	0.2077	0.1305	0.1407	0.0472	0.1311	0.2655	0.0977	0.1655	0.0499	0.2532	0.1587	0.0972	0.1559	0.1117	-0.1288	-0.0188	-0.0004	0.1038	0.0977	-0.044	-0.1202	-0.0448	-0.3818	-0.0071	-0.2126	0.0686
8.2333	-0.0819	-0.0058	0.1852	-0.2246	0.3211	-0.0317	0.0664	0.127	0.1258	0.3338	-0.0126	0.1058	0.1229	-0.0137	0.2021	0.2234	0.0602	-0.0422	0.0338	0.0988	-0.2062	-0.0057	-0.0601	0.1985	0.1241	0.1463	0.0376	0.1209	0.268	0.1195	0.1653	0.06	0.2466	0.1519	0.1	0.1501	0.1144	-0.1329	-0.0179	-0.0006	0.0992	0.1096	-0.0515	-0.128	-0.0313	-0.391	-0.003	-0.2391	0.0679
8.2667	-0.0729	-0.0211	0.1664	-0.2124	0.3133	-0.0226	0.0639	0.1118	0.1261	0.3322	-0.0085	0.0641	0.113	-0.0078	0.2002	0.23	0.051	-0.0368	0.0306	0.1078	-0.1941	-0.0127	-0.0595	0.1854	0.1169	0.1523	0.0394	0.1086	0.2672	0.1306	0.1594	0.0674	0.2526	0.1552	0.0957	0.1441	0.1149	-0.1272	-0.0135	-0.0014	0.0989	0.1222	-0.0511	-0.1354	-0.0273	-0.3891	0.0079	-0.2426	0.0699
8.3	-0.0582	-0.0325	0.1386	-0.202	0.3086	-0.0129	0.0405	0.1126	0.1189	0.3302	0.0111	0.0514	0.1059	-0.0136	0.1937	0.2368	0.0459	-0.0325	0.047	0.1333	-0.1925	-0.0161	-0.0704	0.1821	0.1112	0.1477	0.0364	0.0949	0.2694	0.1303	0.1562	0.0741	0.2511	0.142	0.0897	0.138	0.1091	-0.1281	-0.0158	-0.0075	0.0965	0.1367	-0.0569	-0.1287	-0.0259	-0.391	0.0089	-0.2461	0.0549
8.3333	-0.0498	-0.0404	0.1215	-0.194	0.3018	0.0038	0.0329	0.1129	0.1072	0.3257	0.0282	0.0561	0.1035	-0.0057	0.1914	0.2437	0.0379	-0.0279	0.0192	0.1615	-0.194	-0.0213	-0.077	0.1868	0.107	0.1508	0.0285	0.0994	0.2731	0.1432	0.1578	0.0781	0.2468	0.1285	0.086	0.1374	0.105	-0.1337	-0.01	-0.0079	0.0962	0.1491	-0.0606	-0.1276	-0.025	-0.3929	0.0213	-0.2571	0.0787
8.3667	-0.0436	-0.0524	0.095	-0.1939	0.2924	0.0187	0.0279	0.1117	0.1043	0.3166	0.0483	0.0623	0.1056	-0.0115	0.1782	0.2412	0.0388	-0.0204	0.0229	0.1574	-0.1979	-0.0046	-0.0881	0.1794	0.1144	0.1607	0.0359	0.1001	0.2728	0.1397	0.159	0.0816	0.246	0.1278	0.0846	0.1296	0.0997	-0.139	-0.0055	-0.0016	0.0984	0.1548	-0.0577	-0.1204	-0.0263	-0.3977	0.0366	-0.2591	0.087
8.4	-0.0477	-0.0646	0.0827	-0.1954	0.2782	0.029	0.0223	0.0969	0.101	0.3081	0.0604	0.0457	0.1079	-0.0271	0.1706	0.2258	0.0407	-0.0132	0.0333	0.1771	-0.2051	-0.0138	-0.0876	0.1813	0.1084	0.1789	0.04	0.1039	0.2755	0.1392	0.1614	0.0873	0.2424	0.1166	0.0833	0.1215	0.0911	-0.1443	0.0002	0.009	0.0777	0.1638	-0.0461	-0.1169	-0.0301	-0.4038	0.0555	-0.2681	0.0441
8.4333	-0.0525	-0.0741	0.0782	-0.191	0.2669	0.0262	0.0236	0.0956	0.1022	0.3017	0.0514	0.0077	0.107	-0.0425	0.1619	0.2171	0.039	-0.0081	0.0415	0.1672	-0.2155	-0.0087	-0.0847	0.1966	0.0898	0.2004	0.038	0.0959	0.2352	0.141	0.1624	0.0847	0.237	0.1136	0.0827	0.1183	0.0877	-0.143	0.0057	0.0086	0.0573	0.1719	-0.0532	-0.1238	-0.0376	-0.4044	0.0725	-0.2792	0.0275
8.4667	-0.052	-0.0833	0.0714	-0.1887	0.254	0.0275	0.0321	0.0857	0.1064	0.2908	0.0333	0.0125	0.1134	-0.0477	0.155	0.22	0.0303	-0.0051	0.0354	0.168	-0.2262	-0.0005	-0.0722	0.206	0.086	0.2126	0.0356	0.0922	0.2127	0.1263	0.1623	0.08	0.2371	0.1123	0.0833	0.1195	0.0872	-0.1426	0.0062	0.0078	0.0491	0.174	-0.0585	-0.1206	-0.0432	-0.4014	0.0852	-0.2956	0.0364
8.5	-0.0535	-0.0893	0.0728	-0.1719	0.2558	0.0188	0.0448	0.0843	0.1131	0.2809	0.0156	0.0176	0.1127	-0.0472	0.1451	0.2175	0.0222	0.0015	0.0357	0.1745	-0.2395	0.0004	-0.0764	0.2121	0.0829	0.2197	0.0318	0.0989	0.1874	0.1092	0.1541	0.0766	0.2364	0.1112	0.0837	0.1201	0.088	-0.1399	0.0061	0.0032	0.0322	0.1764	-0.0729	-0.1237	-0.0517	-0.3957	0.0915	-0.2963	0.0504
8.5333	-0.0564	-0.1061	0.0613	-0.1588	0.2671	0.0165	0.0537	0.0838	0.1149	0.2726	0.0106	0.0196	0.1164	-0.03	0.1439	0.2149	0.0134	0.0029	0.0737	0.1705	-0.2638	0.0085	-0.073	0.2242	0.0736	0.2164	0.0435	0.1055	0.1552	0.1126	0.1491	0.0762	0.2347	0.1146	0.0846	0.1269	0.0881	-0.1339	0.0019	-0.0069	0.0232	0.1695	-0.0814	-0.1252	-0.0551	-0.3909	0.1002	-0.3038	0.0396
8.5667	-0.0648	-0.1266	0.0475	-0.1514	0.2748	0.016	0.066	0.0849	0.1151	0.2597	0.0075	0.0192	0.1146	-0.0419	0.1464	0.2126	0.0025	0.0075	0.0794	0.164	-0.2714	0.0113	-0.0759	0.2366	0.0624	0.2247	0.0545	0.0973	0.1381	0.1226	0.1447	0.0808	0.2358	0.1077	0.0877	0.1292	0.0938	-0.1262	0.0054	-0.0065	0.016	0.1611	-0.0591	-0.1255	-0.0605	-0.3821	0.0991	-0.302	0.0303
8.6	-0.0692	-0.1391	0.028	-0.153	0.2828	0.0282	0.0687	0.0693	0.1073	0.249	0.0141	0.0175	0.1178	-0.0348	0.1472	0.2075	-0.0169	0.0111	0.047	0.1586	-0.2739	0.0003	-0.0761	0.2325	0.0628	0.2251	0.0489	0.0999	0.128	0.1302	0.1427	0.0849	0.2372	0.1007	0.091	0.1234	0.0943	-0.1201	0.0118	-0.0021	0.0193	0.1488	-0.0487	-0.1274	-0.0619	-0.3796	0.0858	-0.2992	0.0314
8.6333	-0.0702	-0.142	0.0207	-0.1469	0.2861	0.0487	0.0744	0.0759	0.1081	0.2419	0.0177	0.0122	0.1045	-0.0359	0.1452	0.1956	-0.0231	0.0139	0.0478	0.192	-0.2634	0.0036	-0.0674	0.2384	0.0659	0.224	0.0454	0.1094	0.1305	0.1073	0.1393	0.0897	0.2366	0.0968	0.0812	0.1138	0.0905	-0.1101	0.0247	-0.0083	0.0383	0.1352	-0.0398	-0.1352	-0.0697	-0.3854	0.0812	-0.3	0.0293
8.6667	-0.0686	-0.1397	0.0144	-0.1384	0.3161	0.0665	0.0699	0.0785	0.1087	0.2408	0.0221	-0.0022	0.1284	-0.0362	0.1545	0.186	-0.0409	0.0254	0.0538	0.1759	-0.2533	-0.0023	-0.0604	0.2537	0.0453	0.2157	0.0354	0.1213	0.1266	0.0946	0.1305	0.0959	0.2341	0.0938	0.0763	0.1133	0.0932	-0.1045	0.0283	-0.0072	0.0498	0.128	-0.0551	-0.1348	-0.0729	-0.3931	0.074	-0.2994	0.021
8.7	-0.0685	-0.1474	0.0069	-0.1318	0.3412	0.0867	0.0664	0.0801	0.1008	0.2384	0.0126	0.0118	0.1262	-0.0372	0.1539	0.1751	-0.0631	0.0455	0.0687	0.163	-0.2433	-0.0056	-0.0609	0.2601	0.0331	0.2176	0.0267	0.1241	0.1218	0.0962	0.1291	0.0967	0.2351	0.0979	0.0729	0.1106	0.0983	-0.1046	0.0325	-0.0065	0.0489	0.1192	-0.0555	-0.118	-0.0721	-0.3906	0.0665	-0.3065	0.0122
8.7333	-0.0762	-0.1385	-0.0099	-0.1322	0.339	0.1007	0.06	0.067	0.1031	0.2333	0.0013	0.0057	0.1334	-0.0394	0.1514	0.1675	-0.0729	0.0473	0.0711	0.1269	-0.2341	-0.0069	-0.0542	0.2651	0.0223	0.2264	0.0247	0.1285	0.1349	0.0823	0.129	0.0972	0.2359	0.0965	0.0674	0.1069	0.1004	-0.1066	0.0404	-0.0116	0.0532	0.1041	-0.0319	-0.1078	-0.0717	-0.383	0.0543	-0.3025	0.0087
8.7667	-0.0799	-0.1406	-0.0153	-0.133	0.3274	0.1081	0.054	0.0714	0.0989	0.227	-0.0187	0.0043	0.1161	-0.041	0.1481	0.1625	-0.0732	0.0473	0.0701	0.1376	-0.233	-0.0075	-0.0608	0.2573	0.0127	0.2427	0.0294	0.1237	0.1379	0.0755	0.1233	0.0966	0.2365	0.0948	0.0616	0.1006	0.1056	-0.1116	0.0441	-0.0197	0.0507	0.0842	-0.0468	-0.1099	-0.0775	-0.3748	0.0549	-0.3043	0.0081
8.8	-0.0886	-0.1483	-0.0265	-0.1321	0.3045	0.0928	0.0423	0.0693	0.0925	0.222	-0.0385	0.0131	0.0998	-0.0526	0.1373	0.1547	-0.073	0.0401	0.0464	0.14	-0.2221	-0.0119	-0.0432	0.2502	0.0124	0.2492	0.0299	0.1199	0.1415	0.0681	0.1229	0.0988	0.2397	0.0921	0.0589	0.1032	0.114	-0.1091	0.0442	-0.0195	0.0545	0.0811	-0.0491	-0.0914	-0.0777	-0.3709	0.05	-0.3052	0.007
8.8333	-0.0958	-0.1545	-0.0362	-0.1301	0.2989	0.1027	0.0419	0.0733	0.0845	0.2163	-0.038	0.0092	0.0993	-0.0546	0.1202	0.1458	-0.072	0.0397	0.07	0.1446	-0.208	-0.0065	-0.0141	0.2414	0.0113	0.2438	0.0317	0.1195	0.1368	0.0584	0.1248	0.099	0.2405	0.0925	0.0601	0.1051	0.1181	-0.105	0.0453	-0.0183	0.0537	0.0771	-0.0434	-0.0535	-0.0687	-0.3648	0.0548	-0.3099	0.0082
8.8667	-0.0978	-0.1441	-0.034	-0.1337	0.2899	0.1078	0.0534	0.0508	0.0712	0.2055	-0.0311	0.0038	0.0927	-0.049	0.1137	0.1487	-0.0491	0.0505	0.0454	0.1779	-0.1897	-0.003	0.0216	0.2204	0.0269	0.2402	0.0239	0.1099	0.1107	0.0439	0.1153	0.0966	0.2483	0.0899	0.0616	0.1192	0.118	-0.0878	0.0522	-0.0194	0.0564	0.0755	-0.0381	-0.0359	-0.0651	-0.3703	0.0529	-0.3156	0.011
8.9	-0.0983	-0.1401	-0.0282	-0.1067	0.2871	0.0964	0.058	0.0353	0.0604	0.1979	-0.03	-0.007	0.0844	-0.0418	0.0992	0.1574	-0.0411	0.039	0.0463	0.1814	-0.1816	0.0127	0.0448	0.2124	0.0454	0.2511	0.0247	0.1085	0.103	0.0289	0.1124	0.1043	0.2536	0.0867	0.0651	0.1203	0.1207	-0.0858	0.0593	-0.0199	0.0561	0.0747	-0.0307	-0.0462	-0.0541	-0.3746	0.05	-0.3263	0.0095
8.9333	-0.0994	-0.1329	-0.0273	-0.1066	0.303	0.0967	0.0549	0.0225	0.054	0.1889	-0.0213	0.0005	0.0792	-0.0344	0.0813	0.1584	-0.025	0.0381	0.042	0.1748	-0.1766	0.0201	0.0475	0.1978	0.057	0.2682	0.0126	0.1059	0.0839	0.0056	0.1058	0.1127	0.2537	0.0839	0.0668	0.1223	0.1193	-0.0863	0.0663	-0.0165	0.0492	0.0917	-0.024	-0.0345	-0.0443	-0.3781	0.0627	-0.3306	0.0085
8.9667	-0.0971	-0.1324	-0.0161	-0.0832	0.2962	0.0991	0.041	0.0144	0.0462	0.1922	-0.021	0.0048	0.073	-0.0182	0.0644	0.1513	-0.0161	0.0418	0.0321	0.1708	-0.1727	0.0148	0.0659	0.1901	0.0712	0.2652	0.0004	0.1094	0.0848	-0.0293	0.0983	0.1141	0.2575	0.0837	0.07	0.1272	0.1182	-0.0848	0.0741	-0.0147	0.0348	0.0991	-0.0138	-0.0227	-0.0406	-0.3838	0.059	-0.3332	0.0091
9	-0.0914	-0.1367	-0.013	-0.0818	0.2932	0.1044	0.0489	0.0089	0.0357	0.2041	-0.0208	0.0164	0.0729	-0.0145	0.0613	0.1463	-0.0101	0.0418	0.0248	0.1586	-0.1777	0.0058	0.0777	0.1679	0.0816	0.2706	-0.0137	0.1061	0.0885	-0.0595	0.0922	0.1117	0.2591	0.0801	0.0786	0.1335	0.115	-0.0905	0.086	-0.0069	0.0372	0.0919	-0.0169	-0.0174	-0.0374	-0.3883	0.0448	-0.3314	0.0114
9.0333	-0.0839	-0.1342	-0.0211	-0.0786	0.2994	0.1064	0.0447	0.0237	0.0278	0.2081	-0.0178	0.0192	0.0751	-0.0191	0.0566	0.1368	0.0046	0.0294	0.0115	0.1594	-0.1877	-0.0057	0.1028	0.1544	0.0971	0.2581	-0.0204	0.1031	0.0995	-0.0989	0.0797	0.1085	0.2538	0.0743	0.0814	0.1431	0.1207	-0.0954	0.091	-0.0107	0.0394	0.0868	-0.0188	-0.0156	-0.0354	-0.3947	0.0404	-0.3307	0.0145
9.0667	-0.0719	-0.1396	-0.0256	-0.081	0.3131	0.0886	0.0455	0.0374	0.0319	0.2067	-0.017	0.0185	0.0688	-0.0227	0.0459	0.1345	0.0013	0.0298	0.0064	0.174	-0.1828	-0.0285	0.1199	0.1434	0.1074	0.2348	-0.0264	0.093	0.0916	-0.1184	0.0653	0.1017	0.2508	0.0759	0.0893	0.1511	0.1197	-0.0967	0.0972	-0.0112	0.0437	0.0788	-0.0289	-0.017	-0.039	-0.4036	0.0477	-0.3267	0.0197
9.1	-0.0662	-0.1495	-0.0391	-0.0799	0.3103	0.1008	0.0408	0.0425	0.0378	0.2092	-0.0079	0.0205	0.0681	-0.0367	0.0485	0.1315	0.0059	0.0317	0.0062	0.1791	-0.1894	-0.0355	0.1136	0.1345	0.1106	0.2228	-0.0237	0.0762	0.089	-0.1294	0.0523	0.0926	0.2397	0.0728	0.0907	0.1588	0.1255	-0.105	0.1128	-0.0082	0.0632	0.0751	-0.0272	-0.0205	-0.0406	-0.4102	0.0458	-0.3207	0.0223
9.1333	-0.0604	-0.1678	-0.0421	-0.0809	0.2906	0.1069	0.0333	0.0482	0.0419	0.2043	0.0034	0.0107	0.0728	-0.048	0.0573	0.1301	0.0138	0.0393	0.0034	0.1703	-0.1846	-0.0417	0.0847	0.1315	0.1199	0.1962	-0.0355	0.0602	0.0595	-0.1372	0.0489	0.0838	0.2329	0.0632	0.0946	0.159	0.1304	-0.115	0.1249	-0.0061	0.0768	0.076	-0.0163	-0.0177	-0.0406	-0.4161	0.0486	-0.3161	0.0184
9.1667	-0.0574	-0.1753	-0.0565	-0.0777	0.262	0.1104	0.0236	0.0595	0.05	0.1992	0.0265	0.0176	0.0724	-0.0501	0.0613	0.131	0.0215	0.0452	-0.0039	0.1736	-0.1787	-0.0482	0.0867	0.1296	0.1198	0.192	-0.0546	0.0516	0.053	-0.1342	0.0416	0.0741	0.2297	0.0431	0.095	0.1727	0.1308	-0.12	0.1355	-0.014	0.0847	0.0741	0.0032	-0.0084	-0.0386	-0.4219	0.0462	-0.3136	0.0161
9.2	-0.0588	-0.1769	-0.0735	-0.0855	0.2504	0.1218	0.0092	0.06	0.0603	0.1947	0.0331	0.022	0.0712	-0.0507	0.0602	0.1283	0.0384	0.0482	-0.0024	0.1881	-0.1778	-0.0551	0.086	0.1412	0.112	0.1949	-0.0787	0.0541	0.0616	-0.1326	0.0418	0.0598	0.2249	0.0454	0.1078	0.1867	0.1272	-0.1161	0.1316	-0.0113	0.0885	0.0701	0.0133	-0.0081	-0.0367	-0.424	0.0328	-0.2968	0.0188
9.2333	-0.0653	-0.1699	-0.0935	-0.0783	0.2261	0.1201	-0.0037	0.0567	0.0661	0.1903	0.033	0.0186	0.0844	-0.0543	0.0487	0.1207	0.042	0.0476	-0.0133	0.1899	-0.1692	-0.065	0.0544	0.1515	0.1056	0.1984	-0.0838	0.0613	0.0764	-0.1216	0.0467	0.0511	0.2261	0.0353	0.1124	0.1928	0.1233	-0.1101	0.1345	-0.0131	0.0783	0.0638	0.025	-0.0092	-0.028	-0.4257	0.0258	-0.2888	0.0207
9.2667	-0.0699	-0.1738	-0.1108	-0.0722	0.1931	0.1166	-0.0012	0.0601	0.0721	0.184	0.0303	0.0086	0.0858	-0.062	0.0561	0.1144	0.0476	0.0467	-0.03	0.1887	-0.159	-0.0511	0.0444	0.1279	0.0925	0.2101	-0.0871	0.0613	0.0957	-0.1118	0.0445	0.0407	0.2308	0.0376	0.1086	0.1992	0.1216	-0.1041	0.1347	-0.0137	0.062	0.0586	0.0313	-0.0093	-0.0249	-0.4253	0.0225	-0.2804	0.0141
9.3	-0.0684	-0.184	-0.1205	-0.0564	0.159	0.1236	0.002	0.0631	0.0737	0.179	0.0282	0.0057	0.0843	-0.0697	0.0673	0.1105	0.0404	0.0433	-0.0404	0.1572	-0.1462	-0.0503	0.051	0.1347	0.0955	0.2018	-0.0968	0.0599	0.1042	-0.0982	0.0403	0.0318	0.2329	0.0421	0.104	0.1956	0.1197	-0.1117	0.1334	-0.0167	0.0634	0.0631	0.0287	-0.0154	-0.017	-0.4233	0.0215	-0.2784	-0.005
9.3333	-0.0703	-0.1923	-0.1239	-0.0465	0.1382	0.1187	0.0046	0.0622	0.0664	0.1756	0.0272	0.0036	0.0862	-0.0992	0.0737	0.1179	0.0296	0.0322	-0.0428	0.1509	-0.1455	-0.0438	0.0487	0.1659	0.0982	0.1775	-0.1048	0.0644	0.107	-0.0865	0.0395	0.0257	0.2313	0.0272	0.1009	0.1923	0.116	-0.1232	0.1336	-0.0209	0.0603	0.0764	0.0286	-0.022	-0.0099	-0.4264	0.0203	-0.2743	-0.0223
9.3667	-0.0708	-0.2008	-0.1253	-0.0349	0.1375	0.1164	0.0055	0.0577	0.0592	0.1801	0.0347	-0.0006	0.0905	-0.0869	0.0812	0.1149	0.0304	0.0166	-0.0367	0.1388	-0.1279	-0.0277	0.0316	0.1582	0.1074	0.1731	-0.1102	0.0713	0.1249	-0.1021	0.0445	0.0206	0.2368	0.0307	0.0909	0.1843	0.1102	-0.1329	0.1306	-0.0292	0.0651	0.0762	0.0236	-0.0295	0.0043	-0.4305	0.0245	-0.2722	-0.041
9.4	-0.0707	-0.2071	-0.1234	-0.0274	0.1201	0.1172	0.0092	0.0591	0.0505	0.1865	0.0512	0.0106	0.1026	-0.0925	0.0767	0.1131	0.0384	0.005	-0.0256	0.1389	-0.1169	-0.0239	0.0214	0.1533	0.0977	0.175	-0.1139	0.0842	0.1284	-0.1092	0.0356	0.025	0.2428	0.0289	0.0838	0.1794	0.1085	-0.1425	0.1394	-0.0334	0.0657	0.0699	0.024	-0.0303	0.0064	-0.4397	0.0204	-0.2749	-0.0422
9.4333	-0.0747	-0.2012	-0.1125	-0.0279	0.127	0.1171	0.0201	0.0688	0.0394	0.1891	0.0656	0.0167	0.1111	-0.0895	0.0823	0.1072	0.0456	0.013	-0.0026	0.1293	-0.1139	-0.0222	0.0052	0.1575	0.1099	0.1601	-0.1156	0.0745	0.1302	-0.111	0.0345	0.0216	0.2398	0.0356	0.0779	0.1729	0.0996	-0.1491	0.1425	-0.0387	0.06	0.0554	0.0184	-0.0288	0.0124	-0.4538	0.016	-0.2784	-0.03
9.4667	-0.0783	-0.1838	-0.0957	-0.0262	0.1274	0.1238	0.0251	0.0839	0.0317	0.1938	0.0763	0.0116	0.1104	-0.0697	0.0892	0.1031	0.0518	0.0276	0.0146	0.0983	-0.1095	-0.0266	-0.0246	0.1611	0.0885	0.163	-0.148	0.0609	0.1453	-0.1135	0.0327	0.0172	0.2383	0.0399	0.0688	0.1721	0.092	-0.1551	0.1386	-0.0374	0.0521	0.0421	0.0128	-0.0308	0.0171	-0.4603	0.0137	-0.2727	-0.0112
9.5	-0.085	-0.1811	-0.078	-0.0244	0.1275	0.1457	0.0285	0.0926	0.0261	0.1956	0.0952	0.0096	0.1019	-0.0657	0.112	0.0969	0.0533	0.0307	0.0159	0.0906	-0.1198	-0.0534	-0.0291	0.1717	0.0628	0.1679	-0.1211	0.0522	0.1337	-0.1047	0.044	0.0143	0.2354	0.0454	0.0778	0.1676	0.0862	-0.153	0.1396	-0.0373	0.0385	0.0343	0.0146	-0.0234	0.0256	-0.4703	0.0126	-0.2687	-0.0068
9.5333	-0.0959	-0.1856	-0.0508	-0.0202	0.1268	0.1607	0.014	0.0855	0.0251	0.1942	0.1136	0.0148	0.1003	-0.056	0.1272	0.0893	0.0471	0.038	0.0183	0.0814	-0.1183	-0.0714	-0.0129	0.1859	0.0405	0.1746	-0.0986	0.0479	0.1298	-0.1048	0.0557	0.0087	0.2326	0.0424	0.0691	0.1619	0.084	-0.1498	0.1381	-0.0337	0.0371	0.027	0.0269	-0.026	0.0292	-0.4719	-0.0032	-0.2613	-0.0011
9.5667	-0.1033	-0.2037	-0.0431	-0.0218	0.1189	0.169	-0.0031	0.0728	0.03	0.1832	0.1456	0.0083	0.0992	-0.043	0.1486	0.0804	0.0453	0.0301	0.0279	0.0656	-0.1124	-0.0986	0.0001	0.1843	0.0103	0.1646	-0.1048	0.0441	0.1172	-0.1213	0.0596	0.0017	0.2259	0.0393	0.0644	0.1631	0.0851	-0.1499	0.1218	-0.0373	0.0298	0.0254	0.0442	-0.0253	0.0325	-0.4744	-0.0222	-0.2551	0.0083
9.6	-0.1053	-0.2098	-0.0352	-0.0357	0.1083	0.1804	-0.0135	0.0498	0.0318	0.1738	0.1565	0.0314	0.0937	-0.0212	0.1611	0.0741	0.0475	0.0276	0.0129	0.0562	-0.1109	-0.1022	0.0044	0.1796	-0.0204	0.144	-0.0957	0.0436	0.0913	-0.1436	0.0633	-0.0072	0.1935	0.0341	0.0655	0.1655	0.0897	-0.1486	0.104	-0.0295	0.0216	0.0226	0.0596	-0.0279	0.032	-0.4777	-0.0305	-0.2506	0.0049
9.6333	-0.1083	-0.2137	-0.0168	-0.0409	0.0997	0.1765	-0.0171	0.0342	0.0339	0.1626	0.1616	0.0181	0.0902	-0.0082	0.1626	0.0625	0.0544	0.0363	-0.0046	0.0624	-0.1088	-0.1226	0.0261	0.1684	-0.0523	0.1237	-0.0761	0.0467	0.0775	-0.1599	0.0564	-0.0124	0.1962	0.0312	0.0635	0.1664	0.0939	-0.1338	0.0913	-0.0238	0.0171	0.0192	0.0691	-0.0347	0.0321	-0.4811	-0.0264	-0.2469	0.0082
9.6667	-0.1003	-0.2072	-0.0117	-0.0399	0.0946	0.1775	-0.0258	0.0207	0.04	0.1626	0.1327	-0.0057	0.0813	-0.0052	0.1646	0.0561	0.0613	0.0509	-0.0361	0.0585	-0.1082	-0.1141	0.0017	0.1528	-0.0665	0.1089	-0.0685	0.0666	0.0461	-0.172	0.0568	-0.0158	0.2041	0.0355	0.0634	0.1654	0.0984	-0.1361	0.0775	-0.0231	0.0127	0.0208	0.068	-0.0529	0.0292	-0.4733	-0.0142	-0.251	0.0051
9.7	-0.1079	-0.2049	-0.0108	-0.035	0.0854	0.1838	-0.0327	0.0133	0.0453	0.161	0.1475	-0.0421	0.0793	0.0046	0.176	0.0533	0.0851	0.0523	-0.0604	0.0655	-0.1114	-0.1213	-0.0102	0.1469	-0.091	0.0906	-0.0712	0.076	0.0495	-0.1899	0.0454	-0.0214	0.1977	0.0414	0.0652	0.1629	0.104	-0.1343	0.0582	-0.0237	0.0141	0.0198	0.0819	-0.0628	0.0185	-0.4701	-0.0121	-0.2518	0.0083
9.7333	-0.1181	-0.2105	0.0121	-0.0326	0.0656	0.1785	-0.0317	-0.0018	0.0544	0.1606	0.1728	-0.0574	0.0656	0.0098	0.1813	0.057	0.0996	0.0497	-0.0437	0.0801	-0.1095	-0.1104	-0.0047	0.137	-0.1094	0.0798	-0.0682	0.0821	0.0344	-0.1901	0.0469	-0.0211	0.2011	0.0473	0.0642	0.1606	0.105	-0.1292	0.0464	-0.0228	0.0182	0.0201	0.0965	-0.0653	0.0081	-0.4613	-0.0097	-0.2587	0.0111
9.7667	-0.1191	-0.2216	0.0252	-0.0382	0.0537	0.1801	-0.014	-0.0053	0.0651	0.1667	0.1841	-0.0759	0.0605	0.0075	0.183	0.0493	0.1174	0.0426	-0.045	0.096	-0.0987	-0.0975	-0.0064	0.1271	-0.1305	0.079	-0.0634	0.0858	0.0289	-0.2012	0.0484	-0.0187	0.1998	0.0486	0.0656	0.1618	0.1089	-0.1213	0.0362	-0.0235	0.0178	0.0251	0.1	-0.0741	0.0018	-0.4658	0.0057	-0.2636	0.0133
9.8	-0.1238	-0.2228	0.0292	-0.0439	0.0453	0.1672	-0.01	-0.0233	0.066	0.1758	0.1618	-0.0786	0.0616	0.0161	0.1801	0.0497	0.1464	0.0343	-0.0383	0.0953	-0.1007	-0.1067	-0.0139	0.1243	-0.1328	0.0799	-0.0829	0.0832	0.0452	-0.2163	0.0504	-0.0087	0.1961	0.0497	0.0727	0.1609	0.1076	-0.1115	0.0311	-0.0236	0.0181	0.0279	0.1073	-0.0961	-0.0021	-0.4716	0.0008	-0.2719	0.0101
9.8333	-0.1242	-0.2201	0.0339	-0.0563	0.0524	0.1607	-0.0058	-0.0378	0.0683	0.174	0.1481	-0.0784	0.0686	-0.0009	0.1802	0.0326	0.158	0.0256	-0.0187	0.1084	-0.0976	-0.1184	0.0111	0.1139	-0.1333	0.1039	-0.0747	0.082	0.0539	-0.2218	0.0471	-0.001	0.1927	0.0606	0.0713	0.1644	0.1148	-0.1069	0.0344	-0.0244	0.0104	0.0343	0.1172	-0.0952	-0.0071	-0.4749	0.0142	-0.2742	0.0123
9.8667	-0.1274	-0.2198	0.0344	-0.0753	0.0944	0.1549	-0.0137	-0.037	0.0768	0.1726	0.1488	-0.0742	0.071	-0.0165	0.1753	0.0202	0.1647	0.0224	-0.006	0.096	-0.0944	-0.1226	0.0238	0.0984	-0.1325	0.1078	-0.0684	0.0743	0.034	-0.2067	0.0412	0.0037	0.1813	0.0488	0.0693	0.1607	0.121	-0.1043	0.0404	-0.0276	-0.0022	0.0366	0.122	-0.1341	-0.0065	-0.4775	0.0361	-0.2698	0.0186
9.9	-0.1453	-0.2085	0.0405	-0.0987	0.119	0.1509	-0.0489	-0.0339	0.0802	0.1781	0.1519	-0.0639	0.0748	-0.0316	0.162	0.0068	0.1773	0.0157	0.0122	0.0918	-0.0072	-0.1406	0.0163	0.0896	-0.1138	0.1236	-0.068	0.0615	0.0415	-0.204	0.0357	0.0004	0.1743	0.059	0.0857	0.1551	0.1247	-0.1068	0.074	-0.0251	-0.0147	0.0392	0.1286	-0.1273	0.005	-0.4787	0.0399	-0.2738	0.0252
9.9333	-0.1297	-0.1909	0.1377	-0.148	0.0725	0.074	-0.0541	-0.0521	0.0403	0.1655	0.1512	-0.0361	0.0683	-0.0181	0.1904	0.0227	0.0672	0.0198	-0.0442	0.0546	-0.0017	-0.1416	-0.0167	0.0683	-0.1189	0.1275	-0.075	0.0517	0.0256	-0.2094	0.0318	0.0042	0.1632	0.0473	0.0881	0.1703	0.1274	-0.1079	0.0897	-0.0254	-0.0286	0.0258	0.1327	-0.1201	0.0162	-0.4701	0.0479	-0.2666	0.028
9.9667	-0.1285	-0.0905	0.2103	-0.079	0.1138	0.0066	-0.0496	-0.0515	0.1135	0.1235	0.0544	-0.0756	-0.0197	0.047	0.1162	0.0522	0.0939	-0.0156	0.0711	0.0534	0.0481	-0.117	0.018	0.0387	-0.1132	0.0815	-0.0706	0.0498	0.0041	-0.1904	0.0238	0.0409	0.1459	0.0355	0.1032	0.1814	0.1295	-0.0866	0.1001	-0.0713	-0.048	0.0304	0.1346	-0.0789	0.0199	-0.456	0.0562	-0.2635	0.0419
10	-0.1252	-0.0124	0.2381	-0.0715	0.0995	-0.0281	-0.0235	0.0039	0.1618	0.1236	0.019	-0.0606	0.0046	0.0811	0.0933	0.0646	0.0464	0.0084	0.0306	0.0357	0.0942	-0.1259	0.0554	0.0706	-0.0927	0.1037	-0.077	0.1003	-0.0049	-0.243	0.0132	0.0304	0.1418	0.0443	0.1079	0.1362	0.1151	-0.0778	0.0773	-0.1264	-0.0529	-0.0079	0.1339	-0.1467	0.0259	-0.436	0.0512	-0.1585	0.0644
10.0333	-0.1324	-0.0151	0.28	-0.0971	0.1008	-0.0311	-0.0227	0.0512	0.1367	0.1234	0.0046	-0.0493	-0.0028	0.088	0.0847	0.0616	-0.0006	-0.0003	0.0606	0.0583	0.0725	-0.1414	0.0476	0.1089	-0.0748	0.0973	-0.0361	0.1065	-0.0057	-0.2777	0.0068	0.0269	0.1631	0.1078	0.1134	0.1195	0.1009	-0.0299	0.1055	-0.1938	-0.0509	-0.1094	0.1492	-0.1004	0.0293	-0.3621	0.065	-0.0552	0.0889
10.0667	-0.1435	-0.0217	0.3001	-0.0867	0.0994	-0.0373	0.0138	0.0408	0.1214	0.118	-0.0056	-0.0548	0.0042	0.0822	0.0492	0.0654	0.0118	0.0018	0.0408	0.014	0.1072	-0.1516	0.0704	0.1094	-0.0514	0.0782	-0.049	0.1118	-0.0371	-0.2358	-0.0195	0.0648	0.1581	0.0682	0.0926	0.1469	0.1235	-0.044	0.1039	-0.1372	0.0026	-0.185	0.2137	-0.067	0.0621	-0.3241	0.0754	-0.0882	0.1031
10.1	-0.1513	-0.0408	0.3665	-0.0268	0.0967	-0.0425	0.0282	0.023	0.133	0.1142	-0.0293	-0.0674	0.0181	0.0898	0.0345	0.0576	0.0019	0.0078	0.0803	0.0105	0.0834	-0.1548	0.0696	0.1029	-0.0142	0.0577	-0.1049	0.1159	-0.0344	-0.2378	-0.0839	0.0618	0.1212	0.0534	0.0932	0.1311	0.1391	-0.0486	0.1195	-0.152	0.0634	-0.1534	0.1906	-0.0594	-0.0254	-0.2915	0.039	-0.0828	0.1447
10.1333	-0.1346	-0.0534	0.346	-0.0012	0.0873	-0.047	0.0268	0.0206	0.133	0.0977	0.0038	-0.063	0.0014	0.0708	0.0285	0.0511	-0.0063	0.0074	0.1063	0.026	0.084	-0.145	0.1026	0.0862	-0.0083	0.0613	-0.1221	0.1089	0.0216	-0.2302	-0.0537	0.0516	0.0847	0.0535	0.0931	0.1337	0.1287	-0.053	0.1237	-0.1633	0.0207	-0.1373	0.1795	-0.0565	0.0157	-0.2832	0.0317	-0.0782	0.1183
10.1667	-0.1478	-0.0658	0.3458	0.0245	0.0826	-0.0628	0.0271	0.0117	0.1284	0.0961	0.0042	-0.0589	0.008	0.0854	-0.0067	0.0577	-0.0311	0.0088	0.1405	0.0299	0.0918	-0.1419	0.097	0.0883	-0.0159	0.0533	-0.0867	0.0805	0.0525	-0.2186	-0.0474	0.0573	0.0896	0.0433	0.1002	0.1415	0.1361	-0.0528	0.1368	-0.2097	0.0337	-0.135	0.1708	-0.0593	0.0175	-0.2845	0.0343	-0.0685	0.1437
10.2	-0.1473	-0.0723	0.3054	0.0638	0.0874	-0.0823	0.028	0.0056	0.1444	0.0943	0.0046	-0.0584	0.0065	0.0844	-0.0085	0.0604	-0.0499	0.0096	0.1537	0.0317	0.1016	-0.1331	0.1017	0.078	-0.0135	0.0538	-0.1135	0.1137	0.0623	-0.2058	-0.0706	0.0658	0.0954	0.0363	0.096	0.1377	0.1227	-0.062	0.1342	-0.2092	0.0457	-0.1557	0.176	-0.0482	0.0142	-0.2615	0.0201	-0.0646	0.1593
10.2333	-0.1705	-0.0705	0.2956	0.0536	0.1025	-0.0896	0.0203	-0.0185	0.1581	0.0919	0.0306	-0.0479	-0.0067	0.078	-0.0214	0.053	-0.0635	0.0058	0.1395	0.0088	0.1177	-0.1345	0.0935	0.0727	-0.0195	0.0398	-0.1004	0.1042	0.0798	-0.2173	-0.0888	0.0664	0.0846	0.0285	0.0997	0.106	0.1211	-0.0668	0.1431	-0.1881	0.0522	-0.1447	0.1968	-0.0454	0.0268	-0.2327	0.0283	-0.091	0.1718
10.2667	-0.1493	-0.073	0.3272	0.0331	0.1139	-0.0966	0.0145	-0.0427	0.1563	0.094	0.0545	-0.0404	-0.0067	0.0683	-0.0478	0.0576	-0.0417	0.0042	0.1156	-0.0149	0.1176	-0.1381	0.0512	0.0722	-0.025	0.0399	-0.0859	0.1038	0.1064	-0.2359	-0.0985	0.0725	0.0623	0.0478	0.0809	0.1104	0.1119	-0.0471	0.1404	-0.1769	0.0653	-0.1053	0.1891	-0.0244	0.0229	-0.2169	0.0265	-0.1002	0.1726
10.3	-0.1555	-0.0822	0.2932	0.0116	0.1211	-0.0993	0.0038	-0.055	0.1402	0.0949	0.0549	-0.0301	-0.0132	0.0781	-0.0675	0.0608	-0.0378	0.0041	0.0883	-0.024	0.1234	-0.1563	0.0529	0.0629	-0.0124	0.0476	-0.1148	0.0886	0.0678	-0.2569	-0.1222	0.1247	0.0198	0.0684	0.0898	0.1	0.1088	-0.0372	0.1434	-0.1818	0.0676	-0.0963	0.1663	-0.0199	0.0307	-0.2041	0.0283	-0.1005	0.1559
10.3333	-0.1187	-0.1036	0.3257	0.0141	0.1104	-0.0994	-0.0055	-0.0661	0.137	0.1003	0.0395	-0.0306	-0.0127	0.0811	-0.0888	0.0562	-0.0319	-0.0022	0.0797	-0.0451	0.1105	-0.1759	0.0614	0.0481	-0.0071	0.0477	-0.1084	0.0735	0.0558	-0.2686	-0.1396	0.1328	0.024	0.0683	0.0854	0.0806	0.094	-0.0201	0.1577	-0.1704	0.0591	-0.0853	0.1598	-0.0115	0.0318	-0.2089	0.0276	-0.0998	0.1487
10.3667	-0.1055	-0.1175	0.3314	0.0106	0.0861	-0.0926	-0.0126	-0.0756	0.1352	0.0986	0.0123	-0.0374	-0.0131	0.0563	-0.0591	0.0417	-0.0266	-0.0131	0.0602	-0.0696	0.0963	-0.1817	0.0519	0.0414	-0.0142	0.0463	-0.118	0.0384	0.0685	-0.2739	-0.1457	0.1285	0.0312	0.0459	0.0807	0.0754	0.0786	-0.0298	0.1748	-0.1771	0.0628	-0.0762	0.1878	-0.0044	0.03	-0.222	0.0222	-0.1007	0.146
10.4	-0.1041	-0.1305	0.3247	0.0082	0.0762	-0.0774	-0.0171	-0.077	0.1402	0.116	0.0116	-0.0448	-0.0145	0.0464	-0.0708	0.0365	-0.0271	-0.0292	0.0535	-0.0792	0.0891	-0.1774	0.0423	0.0464	-0.0068	0.0458	-0.119	0.045	0.1115	-0.2912	-0.1575	0.159	0.0076	0.0345	0.0803	0.0677	0.0683	-0.0243	0.1866	-0.1855	0.0584	-0.0684	0.2132	0.0003	0.0325	-0.2107	0.0198	-0.1002	0.1477
10.4333	-0.0936	-0.1429	0.3414	0.0011	0.0718	-0.063	-0.0181	-0.082	0.1399	0.1401	0.0108	-0.0491	-0.0195	0.0277	-0.0868	0.0615	-0.0224	-0.0491	0.0606	-0.0731	0.0998	-0.1653	0.0539	0.0594	0.0014	0.0155	-0.1469	0.0463	0.1147	-0.3133	-0.1689	0.1666	0.0389	0.0442	0.0779	0.0696	0.0677	-0.0151	0.1888	-0.1916	0.0493	-0.0659	0.2329	0.0085	0.0213	-0.2279	0.0178	-0.0965	0.1365
10.4667	-0.0541	-0.1487	0.3688	-0.0101	0.0571	-0.0398	-0.0201	-0.0861	0.137	0.1412	0.0141	-0.054	-0.0245	0.0183	-0.0913	0.048	-0.031	-0.0596	0.0672	-0.0586	0.0743	-0.1459	0.0752	0.0635	0.0029	-0.0072	-0.1431	0.01	0.1245	-0.3145	-0.1828	0.1593	0.0309	0.0512	0.078	0.0722	0.0605	-0.0099	0.1922	-0.1925	0.0325	-0.0547	0.2524	0.0106	0.0287	-0.192	0.0156	-0.0942	0.1332
10.5	-0.0493	-0.1422	0.3738	-0.0411	0.0403	-0.0225	-0.0231	-0.0961	0.1402	0.1404	0.0188	-0.0652	-0.0345	0.0157	-0.1079	0.0345	-0.0375	-0.0654	0.0714	-0.048	0.0652	-0.1463	0.0788	0.0756	0.0017	-0.026	-0.128	0.0236	0.1377	-0.3298	-0.1804	0.1525	0.0284	0.0528	0.0749	0.0671	0.0636	-0.0061	0.1896	-0.1922	0.0382	-0.0427	0.2765	0.0359	0.0393	-0.1876	0.0156	-0.0948	0.1345
10.5333	-0.0262	-0.1311	0.3943	-0.0477	0.0241	-0.0065	-0.0185	-0.109	0.1426	0.1516	0.008	-0.0735	-0.0354	0.0088	-0.1124	0.0146	-0.0389	-0.0851	0.0729	-0.0449	0.0738	-0.1531	0.0565	0.0832	0.0018	-0.0219	-0.1184	0.0253	0.1529	-0.3448	-0.1907	0.1533	0.0078	0.0694	0.0714	0.0768	0.0685	-0.0031	0.1932	-0.1942	0.0446	-0.0611	0.2976	0.0683	0.0551	-0.1819	0.02	-0.093	0.1277
10.5667	-0.0078	-0.1133	0.3954	-0.048	0.0096	0.0081	-0.0157	-0.1032	0.147	0.1602	-0.0114	-0.0764	-0.0431	0.0112	-0.1179	0.0068	-0.0349	-0.0964	0.0742	-0.067	0.1043	-0.1387	0.0483	0.0904	-0.003	-0.0012	-0.1356	0.0376	0.1461	-0.3287	-0.1854	0.1368	-0.0029	0.0784	0.0584	0.0779	0.0661	0.0112	0.1838	-0.1966	0.0467	-0.0453	0.3203	0.0821	0.0724	-0.1779	0.0201	-0.0886	0.1347
10.6	0.0145	-0.0983	0.3422	-0.0622	0.0005	0.0237	-0.0198	-0.0986	0.1488	0.1713	-0.0154	-0.0782	-0.0527	0.0105	-0.1216	0.004	-0.0298	-0.1101	0.095	-0.1038	0.13	-0.1408	0.0411	0.0741	-0.0177	0.0079	-0.1428	0.0557	0.1675	-0.3208	-0.1875	0.1421	-0.0214	0.09	0.0623	0.0719	0.0734	0.0241	0.1805	-0.1971	0.0481	-0.0348	0.3176	0.1111	0.0887	-0.1707	0.0236	-0.0878	0.132
10.6333	0.0207	-0.0868	0.3518	-0.0592	1.885e-05	0.0399	-0.0283	-0.0941	0.148	0.1743	-0.0277	-0.0699	-0.0744	0.0126	-0.1278	-0.0179	-0.0172	-0.1313	0.1099	-0.1225	0.1481	-0.1401	0.0185	0.0625	-0.0295	-0.0011	-0.1514	0.0656	0.1976	-0.3083	-0.1881	0.1493	-0.0229	0.0931	0.053	0.0692	0.0811	0.0276	0.1847	-0.1985	0.0309	-0.0422	0.3163	0.1276	0.1072	-0.1631	0.0306	-0.0852	0.1338
10.6667	0.0131	-0.0792	0.3534	-0.0502	-0.0043	0.0549	-0.0298	-0.0823	0.1414	0.1774	-0.0398	-0.0646	-0.0784	0.0107	-0.1397	-0.0286	-0.0095	-0.1374	0.1177	-0.1349	0.1628	-0.1287	-0.0223	0.0404	-0.0346	0.0035	-0.1471	0.0778	0.1844	-0.287	-0.1879	0.1427	-0.0393	0.1066	0.0421	0.063	0.0914	0.0375	0.1888	-0.1963	0.0176	-0.0365	0.3166	0.1618	0.1262	-0.1473	0.0388	-0.0839	0.1278
10.7	0.0166	-0.0712	0.3403	-0.0273	-0.0156	0.0736	-0.0334	-0.0691	0.1348	0.184	-0.0487	-0.0469	-0.0807	0.0019	-0.128	-0.0372	-0.0115	-0.1344	0.142	-0.1479	0.1874	-0.1373	-0.0456	0.0172	-0.0356	0.012	-0.1363	0.075	0.1874	-0.2716	-0.1821	0.146	-0.0614	0.1039	0.0356	0.0533	0.0931	0.0428	0.1906	-0.1908	0.0236	-0.012	0.3351	0.1872	0.1393	-0.1252	0.0475	-0.0832	0.1314
10.7333	0.0232	-0.058	0.3213	-0.0086	-0.0158	0.092	-0.027	-0.0557	0.1264	0.1712	-0.0577	-0.0281	-0.089	-0.0009	-0.1322	-0.047	0.0066	-0.129	0.1391	-0.1577	0.1963	-0.1264	-0.0568	0.0109	-0.032	-0.0098	-0.1378	0.0808	0.1794	-0.259	-0.1684	0.1562	-0.0593	0.1142	0.0188	0.0372	0.0969	0.0453	0.1921	-0.1844	0.0366	0.0081	0.3528	0.2148	0.1577	-0.107	0.0565	-0.0833	0.1278
10.7667	0.0431	-0.04	0.3056	-0.0017	-0.0198	0.1046	-0.0163	-0.0523	0.1184	0.1756	-0.072	-0.0248	-0.1122	-0.011	-0.1384	-0.0506	0.0259	-0.1184	0.1378	-0.1797	0.1999	-0.1311	-0.068	-0.0006	-0.0376	-0.0285	-0.1343	0.0885	0.153	-0.2579	-0.1558	0.1823	-0.0629	0.1258	0.0095	0.0294	0.0946	0.0484	0.1907	-0.1736	0.0515	0.0004	0.3694	0.2411	0.1742	-0.0841	0.0636	-0.084	0.1305
10.8	0.0436	-0.0336	0.3065	0.0126	-0.026	0.1206	0.0052	-0.0489	0.1154	0.1626	-0.0784	-0.023	-0.1317	-0.0139	-0.144	-0.0572	0.0448	-0.1133	0.1384	-0.1603	0.2261	-0.1279	-0.0775	-0.0117	-0.0445	-0.0503	-0.1231	0.0646	0.1368	-0.247	-0.1481	0.1998	-0.0677	0.1414	0.0057	0.0293	0.0914	0.0472	0.1742	-0.158	0.0541	-0.0031	0.3903	0.2718	0.2047	-0.0495	0.0655	-0.084	0.1331
10.8333	0.0512	-0.0254	0.293	0.0233	-0.0345	0.1264	0.0202	-0.0583	0.1098	0.1668	-0.097	-0.0251	-0.1412	0.0013	-0.1664	-0.0701	0.0565	-0.1105	0.1458	-0.162	0.2391	-0.1125	-0.0624	-0.0288	-0.0517	-0.0647	-0.1162	0.0785	0.1356	-0.2521	-0.1168	0.2101	-0.0748	0.1392	0.0168	0.0242	0.0839	0.049	0.1595	-0.1431	0.0606	-0.026	0.4052	0.2935	0.2353	-0.0279	0.0599	-0.0849	0.1346
10.8667	0.0534	-0.038	0.2738	0.0306	-0.0486	0.1334	0.0221	-0.062	0.1058	0.1498	-0.1254	-0.0222	-0.146	0.0058	-0.1849	-0.0756	0.0664	-0.1098	0.1698	-0.1675	0.2465	-0.0907	-0.0522	-0.0395	-0.0516	-0.0713	-0.1191	0.0801	0.1172	-0.2583	-0.1014	0.2154	-0.0674	0.1504	0.0194	0.0243	0.0788	0.0426	0.1382	-0.1304	0.0627	-0.0108	0.4078	0.3196	0.2547	-0.0168	0.0579	-0.0822	0.1249
10.9	0.0532	-0.0236	0.2595	0.0375	-0.0534	0.1462	0.033	-0.0667	0.0963	0.1472	-0.1443	-0.0297	-0.1481	0.0269	-0.2064	-0.0748	0.081	-0.1058	0.1722	-0.1651	0.2248	-0.0711	-0.0627	-0.0572	-0.05	-0.0844	-0.1265	0.096	0.1154	-0.2602	-0.0834	0.2358	-0.0666	0.1659	0.014	0.0241	0.0737	0.0426	0.1208	-0.119	0.059	0.0099	0.4265	0.3382	0.2817	-0.0114	0.0523	-0.0754	0.1129
10.9333	0.0523	-0.0064	0.2496	0.0449	-0.0592	0.1633	0.0385	-0.0473	0.0865	0.1453	-0.191	0.0059	-0.1551	0.0376	-0.2197	-0.0718	0.0997	-0.1001	0.1492	-0.1621	0.2352	-0.0445	-0.063	-0.0493	-0.0423	-0.0949	-0.1132	0.1125	0.1008	-0.2616	-0.0667	0.2409	-0.0704	0.1656	0.0108	0.0207	0.0726	0.0453	0.1095	-0.1086	0.0627	0.0141	0.4512	0.3649	0.3059	0.0035	0.0396	-0.0671	0.0986
10.9667	0.0435	0.0043	0.2478	0.0626	-0.064	0.1735	0.0424	-0.0316	0.0723	0.1491	-0.2007	-0.0042	-0.163	0.0423	-0.2296	-0.0733	0.1197	-0.0963	0.1196	-0.1625	0.2655	-0.0161	-0.0459	-0.052	-0.0343	-0.1171	-0.105	0.133	0.0872	-0.2508	-0.0513	0.2376	-0.0491	0.1479	0.0055	0.0198	0.0696	0.0498	0.1054	-0.1036	0.0602	0.007	0.4729	0.3823	0.3129	0.0154	0.0128	-0.06	0.0878
11	0.0333	0.0008	0.2576	0.0753	-0.0791	0.1949	0.0433	-0.0194	0.0684	0.1449	-0.2221	-0.0041	-0.1735	0.0537	-0.2316	-0.0674	0.1302	-0.0986	0.1039	-0.1775	0.2358	0.0063	-0.0207	-0.0603	-0.0387	-0.1318	-0.1046	0.1467	0.0726	-0.2439	-0.0385	0.2384	-0.0303	0.1311	0.0129	0.012	0.0645	0.0455	0.0945	-0.1022	0.0596	-0.0026	0.4929	0.3986	0.3316	0.0278	-0.0069	-0.0561	0.0903
11.0333	0.0223	0.0016	0.2579	0.0997	-0.0888	0.214	0.0446	-0.0078	0.0685	0.149	-0.2181	-0.0103	-0.1834	0.0514	-0.2315	-0.0683	0.1346	-0.0967	0.0872	-0.1764	0.2238	0.0263	-0.0164	-0.0941	-0.0504	-0.1365	-0.0862	0.1534	0.0697	-0.2364	-0.0189	0.2486	-0.0198	0.1269	0.0169	-0.0023	0.0614	0.0509	0.0792	-0.0948	0.061	-0.0004	0.5156	0.4094	0.3474	0.0398	-0.0188	-0.0562	0.0921
11.0667	0.0187	0.0026	0.257	0.118	-0.0852	0.2234	0.0439	-0.0102	0.0715	0.1536	-0.2354	-0.0219	-0.1925	0.057	-0.2307	-0.0769	0.1299	-0.0909	0.0763	-0.1668	0.2058	0.0294	-0.0229	-0.1013	-0.0719	-0.1366	-0.0745	0.1669	0.1034	-0.2204	-0.007	0.237	-0.0072	0.1181	0.0251	-0.0183	0.0588	0.0521	0.0637	-0.0946	0.0694	-0.0085	0.5205	0.4299	0.3616	0.0612	-0.0307	-0.0548	0.0894
11.1	0.0143	0.0032	0.2545	0.1359	-0.0728	0.2437	0.0417	-0.0077	0.0796	0.1565	-0.2352	-0.0327	-0.2091	0.0486	-0.225	-0.0794	0.1218	-0.0964	0.0653	-0.1325	0.194	0.0387	-0.0266	-0.1097	-0.0723	-0.1262	-0.0582	0.1496	0.1304	-0.191	-0.0043	0.2324	0.0024	0.1168	0.0228	-0.0288	0.0591	0.0551	0.0498	-0.076	0.0702	0.0066	0.5229	0.4332	0.3882	0.0865	-0.0379	-0.054	0.0909
11.1333	0.0076	0.0002	0.2432	0.1532	-0.0573	0.2563	0.0373	-0.0179	0.0837	0.162	-0.2386	-0.0488	-0.2221	0.0379	-0.2275	-0.0851	0.1116	-0.099	0.0524	-0.0909	0.2013	0.0212	-0.0258	-0.1156	-0.0617	-0.1091	-0.0355	0.1577	0.1437	-0.1825	-0.0044	0.2366	0.0209	0.1168	0.0379	-0.0332	0.058	0.0579	0.0439	-0.0477	0.089	0.0179	0.5177	0.4408	0.4101	0.108	-0.0422	-0.0524	0.0927
11.1667	-0.0009	-0.0106	0.2369	0.1689	-0.0507	0.2697	0.0495	-0.0236	0.0843	0.1649	-0.2339	-0.0656	-0.2415	0.0287	-0.2295	-0.0858	0.0892	-0.0966	0.0474	-0.0541	0.1991	0.0077	-0.0166	-0.1366	-0.0503	-0.0974	-0.0166	0.1591	0.1444	-0.1725	-0.0005	0.2304	0.0355	0.1256	0.0444	-0.0414	0.0516	0.057	0.0352	-0.0208	0.1044	0.0115	0.5211	0.448	0.4274	0.1356	-0.0428	-0.0594	0.0891
11.2	-0.0111	-0.0208	0.2315	0.1735	-0.0551	0.2713	0.0543	-0.0306	0.0908	0.1668	-0.2266	-0.0925	-0.2564	0.0184	-0.23	-0.0785	0.0707	-0.0872	0.0313	-0.0227	0.2057	-0.0098	-0.0177	-0.1595	-0.0318	-0.0806	-0.0069	0.1655	0.1634	-0.1856	-0.0035	0.2255	0.0653	0.1286	0.0546	-0.0432	0.0418	0.0549	0.0379	0.0002	0.1243	0.0225	0.529	0.4475	0.4417	0.1609	-0.0441	-0.0678	0.0803
11.2333	-0.0266	-0.0301	0.2154	0.1723	-0.0683	0.2554	0.0544	-0.0338	0.0821	0.1664	-0.2318	-0.1303	-0.2722	0.0147	-0.2217	-0.0685	0.0607	-0.0926	0.0309	-0.0078	0.1717	-0.0279	-0.0207	-0.1699	-0.0236	-0.0645	-0.0054	0.175	0.1798	-0.1732	-0.0008	0.2203	0.0785	0.1324	0.0601	-0.0459	0.0337	0.0587	0.0349	0.0186	0.1352	0.0272	0.5201	0.4584	0.4514	0.189	-0.035	-0.0741	0.0729
11.2667	-0.0407	-0.0489	0.1999	0.1764	-0.0923	0.2498	0.0556	-0.032	0.0766	0.1695	-0.2302	-0.1462	-0.2734	0.006	-0.2179	-0.0691	0.0622	-0.1004	0.0144	-0.0125	0.1439	-0.0315	-0.022	-0.1692	-0.0075	-0.053	-0.0025	0.1762	0.1897	-0.1642	0.0046	0.2278	0.097	0.1362	0.0642	-0.0504	0.0232	0.0534	0.0249	0.0348	0.1456	0.0324	0.5316	0.4864	0.4483	0.2354	-0.032	-0.0828	0.0799
11.3	-0.0525	-0.0601	0.1747	0.1699	-0.1057	0.2441	0.0533	-0.0024	0.0719	0.1708	-0.2252	-0.1608	-0.2711	-0.0059	-0.2152	-0.0631	0.0625	-0.1054	0.0213	-0.0123	0.1287	-0.0436	-0.0221	-0.1549	0.0015	-0.0398	-0.0118	0.1718	0.1914	-0.1321	0.0126	0.2169	0.1073	0.141	0.0647	-0.0462	0.014	0.042	0.0122	0.0503	0.1467	0.0415	0.5619	0.4867	0.458	0.2714	-0.034	-0.0874	0.086
11.3333	-0.0632	-0.0654	0.1443	0.1567	-0.1104	0.233	0.0481	0.0168	0.0672	0.171	-0.2229	-0.1764	-0.2713	-0.0071	-0.2086	-0.0598	0.0679	-0.1047	0.0249	-0.0027	0.1033	-0.0531	-0.0211	-0.1277	0.0144	-0.044	-0.0164	0.1646	0.1971	-0.1314	0.021	0.204	0.1169	0.144	0.059	-0.0404	0.007	0.0276	0.0044	0.0714	0.1438	0.0539	0.5841	0.4882	0.4602	0.2963	-0.0325	-0.0969	0.0924
11.3667	-0.077	-0.0634	0.12	0.1606	-0.1177	0.2185	0.0638	0.0102	0.062	0.1714	-0.2278	-0.1846	-0.2631	-0.0066	-0.2073	-0.0643	0.0674	-0.1022	0.0473	0.0104	0.0837	-0.0609	-0.0215	-0.1117	0.0175	-0.0384	-0.0292	0.189	0.2024	-0.1371	0.0295	0.2016	0.1228	0.136	0.0576	-0.0327	0.0047	0.0164	-0.0225	0.0916	0.1413	0.0554	0.601	0.4951	0.4671	0.317	-0.0276	-0.1006	0.0952
11.4	-0.0928	-0.0567	0.0896	0.162	-0.1149	0.2167	0.0668	0.0062	0.0564	0.1747	-0.2368	-0.1959	-0.2593	-0.0077	-0.2186	-0.0606	0.0682	-0.1043	0.0998	0.0196	0.0758	-0.0777	-0.0161	-0.1006	0.0202	-0.0342	-0.0413	0.2103	0.1849	-0.1332	0.0301	0.1946	0.1253	0.1433	0.0533	-0.0233	0.0017	0.0159	-0.0407	0.1022	0.136	0.05	0.6107	0.4965	0.4682	0.3366	-0.0328	-0.1043	0.1041
11.4333	-0.1069	-0.0507	0.057	0.1619	-0.107	0.2107	0.0565	-0.0059	0.0534	0.182	-0.2422	-0.1951	-0.2561	-0.0079	-0.2182	-0.0629	0.0666	-0.1013	0.1797	0.0323	0.0649	-0.0918	0.0031	-0.0887	0.0293	-0.0234	-0.0508	0.2465	0.1872	-0.1427	0.0333	0.1854	0.1242	0.1646	0.0506	-0.0058	-0.0007	0.0108	-0.0513	0.1247	0.1318	0.05	0.6106	0.5035	0.4668	0.3586	-0.0401	-0.113	0.1001
11.4667	-0.1252	-0.0428	0.0416	0.177	-0.105	0.2058	0.0493	-0.0246	0.056	0.1884	-0.2514	-0.2014	-0.2433	-0.0038	-0.2185	-0.0614	0.0736	-0.0949	0.1897	0.0407	0.065	-0.1037	-0.0007	-0.0791	0.0476	-0.0178	-0.0701	0.2565	0.1904	-0.1439	0.0407	0.177	0.1122	0.1978	0.0467	0.0062	0.004	-0.0066	-0.0497	0.1446	0.1309	0.0449	0.6104	0.5117	0.4674	0.371	-0.0463	-0.1269	0.0955
11.5	-0.1393	-0.0324	0.0282	0.1824	-0.1007	0.209	0.0432	-0.0456	0.0621	0.1874	-0.2684	-0.2035	-0.232	-0.0051	-0.2082	-0.0612	0.0682	-0.0928	0.1849	0.0436	0.0698	-0.1196	-0.0046	-0.065	0.064	-0.0302	-0.0933	0.2726	0.1902	-0.1461	0.0437	0.1678	0.1011	0.2261	0.0309	0.0144	0.0073	-0.01	-0.0503	0.163	0.1245	0.0398	0.6217	0.5203	0.4654	0.3796	-0.0492	-0.1355	0.0894
11.5333	-0.1466	-0.0103	0.042	0.1848	-0.1009	0.2046	0.0357	-0.0481	0.0658	0.1857	-0.2951	-0.207	-0.2219	-0.0071	-0.1895	-0.062	0.0693	-0.0868	0.1649	0.0304	0.0704	-0.1446	-0.0056	-0.0567	0.0589	-0.0409	-0.1164	0.2834	0.1871	-0.1461	0.0407	0.1635	0.0975	0.2484	0.0259	0.025	0.0107	-0.0141	-0.0512	0.1897	0.1135	0.0171	0.6205	0.5375	0.4647	0.3945	-0.0534	-0.144	0.0857
11.5667	-0.1501	0.0191	0.0657	0.1819	-0.0608	0.2003	0.0376	-0.0525	0.0649	0.1909	-0.3032	-0.2103	-0.2207	-0.0191	-0.1663	-0.0656	0.0583	-0.0794	0.1534	0.0208	0.0753	-0.17	-0.0205	-0.0523	0.073	-0.0451	-0.1273	0.2918	0.1834	-0.1477	0.041	0.153	0.1009	0.2617	0.0185	0.0359	0.0095	-0.0209	-0.0532	0.2094	0.0774	0.0108	0.6152	0.5433	0.4592	0.4051	-0.0578	-0.1523	0.0806
11.6	-0.1491	0.0358	0.0783	0.1748	-0.0457	0.2107	0.0303	-0.0625	0.0649	0.205	-0.2935	-0.1872	-0.2072	-0.0334	-0.1507	-0.0626	0.0533	-0.087	0.1361	0.0247	0.0842	-0.1768	-0.0354	-0.0531	0.0704	-0.0594	-0.14	0.2974	0.1796	-0.1381	0.0415	0.1517	0.1067	0.2693	0.0119	0.0501	0.0108	-0.0263	-0.0464	0.2351	0.0542	-0.001	0.6047	0.5419	0.4545	0.4176	-0.0528	-0.1572	0.0862
11.6333	-0.1414	0.0462	0.0788	0.1587	-0.0352	0.211	0.0288	-0.0649	0.0629	0.2169	-0.2823	-0.1918	-0.2109	-0.0511	-0.1383	-0.0603	0.0478	-0.0845	0.1072	0.0173	0.0832	-0.1835	-0.0468	-0.0732	0.0623	-0.0593	-0.1419	0.3034	0.1839	-0.1359	0.0429	0.1609	0.1058	0.2796	0.0101	0.0626	0.0149	-0.034	-0.0409	0.2631	0.0498	-0.023	0.5902	0.5452	0.4569	0.4218	-0.049	-0.1583	0.0951
11.6667	-0.1366	0.0555	0.0736	0.1443	-0.0627	0.2063	0.0167	-0.0645	0.0646	0.2215	-0.2786	-0.1986	-0.2136	-0.0679	-0.1204	-0.057	0.0444	-0.08	0.0613	0.014	0.0884	-0.1906	-0.0476	-0.0882	0.0523	-0.0648	-0.1473	0.3067	0.1965	-0.1393	0.0457	0.172	0.1015	0.2881	0.0014	0.0685	0.0155	-0.0332	-0.037	0.2765	0.0546	-0.0469	0.5869	0.5438	0.4504	0.4365	-0.0522	-0.1614	0.1029
11.7	-0.1298	0.0608	0.0495	0.1327	-0.0863	0.188	0.0083	-0.0566	0.0613	0.2219	-0.2631	-0.1881	-0.2099	-0.0666	-0.1302	-0.0559	0.0477	-0.0786	0.0508	0.011	0.1056	-0.1813	-0.0554	-0.0821	0.0508	-0.0572	-0.1605	0.3096	0.195	-0.1522	0.0431	0.1783	0.0983	0.3063	0.0048	0.0754	0.015	-0.0156	-0.0303	0.2799	0.0508	-0.0574	0.5717	0.5481	0.4534	0.4538	-0.0468	-0.1629	0.1034
11.7333	-0.1308	0.0663	0.0342	0.1225	-0.0982	0.1723	-0.0094	-0.055	0.0557	0.2225	-0.2543	-0.1706	-0.2131	-0.0706	-0.1341	-0.0576	0.0515	-0.0834	0.0446	-0.0053	0.1063	-0.1831	-0.0717	-0.0707	0.0514	-0.0447	-0.1618	0.3134	0.1912	-0.1573	0.0351	0.1888	0.0992	0.3078	0.0082	0.0806	0.0119	-0.0011	-0.0296	0.2736	0.0506	-0.0608	0.5661	0.5502	0.4507	0.4678	-0.0471	-0.1666	0.0973
11.7667	-0.1326	0.0618	0.0211	0.1188	-0.098	0.1663	-0.0095	-0.0453	0.056	0.225	-0.2445	-0.1615	-0.2121	-0.0761	-0.1396	-0.0593	0.0548	-0.0898	0.0225	-0.0144	0.1003	-0.1844	-0.0555	-0.048	0.0543	-0.0449	-0.1623	0.3113	0.1797	-0.1537	0.0196	0.2038	0.1133	0.3026	0.0136	0.0914	0.0065	0.011	-0.0358	0.2672	0.0514	-0.0505	0.5589	0.5526	0.4567	0.4696	-0.0536	-0.1719	0.0869
11.8	-0.1341	0.0672	0.0086	0.1219	-0.0962	0.1558	-0.0089	-0.047	0.0607	0.2317	-0.2259	-0.1307	-0.2114	-0.0796	-0.1357	-0.0628	0.0807	-0.0994	0.0004	-0.0354	0.0929	-0.1729	-0.0708	-0.0209	0.0554	-0.0419	-0.1687	0.3018	0.1835	-0.1551	0.0172	0.2178	0.1241	0.2797	0.0271	0.0995	-0.0002	0.0226	-0.0363	0.263	0.0594	-0.0365	0.5491	0.5539	0.4653	0.4816	-0.0697	-0.1709	0.0762
11.8333	-0.1364	0.0612	-0.0049	0.1141	-0.0883	0.1494	-0.0096	-0.0396	0.0606	0.238	-0.2069	-0.1317	-0.2211	-0.0815	-0.1374	-0.0667	0.0886	-0.1086	-0.0291	-0.0576	0.0974	-0.158	-0.0897	-0.0126	0.0581	-0.0348	-0.1804	0.2878	0.1731	-0.1753	0.0154	0.2316	0.1247	0.2647	0.0324	0.0951	-0.0077	0.0285	-0.0462	0.2596	0.0292	-0.0192	0.5359	0.5491	0.4714	0.481	-0.0787	-0.1747	0.0667
11.8667	-0.1393	0.0546	-0.0142	0.1091	-0.07	0.1459	-0.0159	-0.0269	0.0602	0.2374	-0.1825	-0.1211	-0.2362	-0.0828	-0.1201	-0.0761	0.084	-0.107	-0.0536	-0.0603	0.1016	-0.1504	-0.085	-0.0114	0.0538	-0.0362	-0.188	0.2829	0.1697	-0.178	0.0124	0.241	0.1263	0.2447	0.0276	0.0871	-0.0145	0.0407	-0.054	0.2529	0.0264	-0.0042	0.5299	0.5477	0.4759	0.4876	-0.0913	-0.1759	0.0627
11.9	-0.1322	0.0561	-0.0297	0.1046	-0.0452	0.1553	-0.0009	-0.0161	0.0587	0.2377	-0.1541	-0.1263	-0.2351	-0.097	-0.1138	-0.0713	0.0812	-0.1059	-0.0638	-0.0474	0.1131	-0.1373	-0.1071	-0.0092	0.0285	-0.0436	-0.1885	0.2594	0.1555	-0.1755	0.0176	0.239	0.1363	0.2466	0.0263	0.0799	-0.0169	0.0305	-0.0609	0.2404	0.0209	0.0125	0.5259	0.5441	0.4775	0.5001	-0.103	-0.1779	0.0642
11.9333	-0.1205	0.0516	-0.0353	0.0984	-0.0243	0.1695	-0.0045	-0.0111	0.0537	0.2316	-0.1361	-0.1063	-0.2392	-0.1093	-0.1112	-0.0767	0.0853	-0.1111	-0.0538	-0.0348	0.119	-0.1305	-0.1161	0.0059	0.0271	-0.0504	-0.1814	0.2502	0.1687	-0.1782	0.0224	0.2378	0.1105	0.2647	0.0298	0.0902	-0.0197	0.031	-0.0587	0.2177	0.0158	0.0256	0.5206	0.5426	0.4798	0.4739	-0.1201	-0.1708	0.0595
11.9667	-0.1049	0.0548	-0.0463	0.0752	-0.0097	0.1476	-0.0114	-0.0037	0.0532	0.2194	-0.1329	-0.1069	-0.2466	-0.113	-0.1079	-0.0663	0.0905	-0.1178	-0.0475	-0.0366	0.1217	-0.1269	-0.1277	0.0146	0.0354	-0.0564	-0.1637	0.2411	0.175	-0.1766	0.0261	0.2351	0.1133	0.2611	0.0255	0.0908	-0.0164	0.0159	-0.056	0.1929	0.0105	0.0312	0.5125	0.5393	0.482	0.4974	-0.1295	-0.1717	0.0556
12	-0.0986	0.0609	-0.0449	0.0619	0.0084	0.1328	-0.0006	0.0138	0.0527	0.2049	-0.1208	-0.1136	-0.2575	-0.1185	-0.0953	-0.06	0.0786	-0.1292	-0.0093	-0.0378	0.1419	-0.13	-0.1535	0.0076	0.0211	-0.0611	-0.1477	0.219	0.1907	-0.1673	0.025	0.2373	0.1269	0.2564	0.0181	0.0886	-0.0134	0.0084	-0.0594	0.1754	-0.0015	0.018	0.5176	0.5348	0.4822	0.526	-0.1427	-0.1716	0.0594
12.0333	-0.0884	0.0663	-0.0419	0.0709	0.0227	0.131	0.0105	0.0171	0.0538	0.1877	-0.1142	-0.1295	-0.2601	-0.1307	-0.0806	-0.054	0.0778	-0.1437	0.015	-0.0468	0.1539	-0.1319	-0.1666	8.35e-05	0.0307	-0.0612	-0.1396	0.2092	0.2156	-0.1543	0.0257	0.2469	0.1354	0.2412	0.0205	0.0761	-0.0158	0.0005	-0.0638	0.1543	0.0006	-0.0116	0.5206	0.5154	0.4801	0.5313	-0.1442	-0.1757	0.0641
12.0667	-0.0754	0.0721	-0.0282	0.0568	0.0424	0.1292	0.0154	0.0273	0.0548	0.172	-0.0982	-0.1448	-0.2685	-0.1406	-0.066	-0.0448	0.0894	-0.1491	0.0323	-0.0633	0.1457	-0.1481	-0.175	-0.014	0.0236	-0.0603	-0.1328	0.2078	0.1899	-0.1433	0.0227	0.2599	0.1382	0.2175	0.0084	0.0726	-0.0199	0.0006	-0.0651	0.1378	-0.0053	-0.0354	0.5259	0.4923	0.4761	0.5309	-0.1444	-0.1808	0.059
12.1	-0.0767	0.0687	-0.0008	0.038	0.0651	0.1247	0.0234	0.0225	0.0571	0.1633	-0.0828	-0.1553	-0.2799	-0.1537	-0.0561	-0.0395	0.0831	-0.1302	0.0581	-0.0748	0.1459	-0.153	-0.1837	-0.039	0.0089	-0.0599	-0.1046	0.2025	0.1857	-0.125	0.0253	0.2751	0.1418	0.2194	0.0011	0.0586	-0.0276	0.0019	-0.0668	0.1221	-0.0089	-0.0581	0.5421	0.479	0.4718	0.5347	-0.1428	-0.1778	0.0586
12.1333	-0.0759	0.0667	0.0079	0.0361	0.0885	0.1301	0.033	0.0199	0.0648	0.1542	-0.0706	-0.1721	-0.2825	-0.1602	-0.0502	-0.0318	0.0723	-0.1197	0.0872	-0.0964	0.1123	-0.1581	-0.1842	-0.0385	-0.0087	-0.0628	-0.0572	0.1956	0.1912	-0.1221	0.0266	0.2837	0.1406	0.2305	0.0049	0.0463	-0.0369	-0.0118	-0.0705	0.1092	-0.0166	-0.0629	0.5483	0.4666	0.4685	0.545	-0.136	-0.1838	0.062
12.1667	-0.0832	0.0526	0.0229	0.0218	0.1137	0.1398	0.0446	0.0151	0.073	0.1508	-0.0641	-0.1652	-0.2859	-0.1692	-0.0448	-0.0289	0.0601	-0.1045	0.1287	-0.1067	0.1004	-0.1575	-0.1741	-0.0368	-0.0123	-0.0713	-0.061	0.1905	0.2012	-0.1279	0.0271	0.2861	0.1407	0.2171	0.0098	0.0325	-0.0409	-0.0096	-0.0722	0.1074	-0.0133	-0.0648	0.5716	0.4617	0.4705	0.5497	-0.1292	-0.1907	0.064
12.2	-0.0913	0.0454	0.0171	0.0205	0.131	0.1415	0.046	0.0133	0.0703	0.1485	-0.0587	-0.1841	-0.2876	-0.1792	-0.0412	-0.0258	0.0238	-0.0938	0.1605	-0.1201	0.0753	-0.152	-0.1723	-0.0232	-0.0336	-0.0757	-0.0628	0.186	0.2092	-0.1301	0.0242	0.3033	0.1331	0.2216	0.0173	0.039	-0.0426	-0.0073	-0.0677	0.1045	-0.0072	-0.0607	0.5763	0.4523	0.4753	0.5595	-0.1264	-0.1968	0.0649
12.2333	-0.0984	0.05	0.0147	0.0266	0.142	0.1367	0.0505	0.0051	0.0605	0.1483	-0.0639	-0.1909	-0.2967	-0.1866	-0.0303	-0.0239	0.013	-0.0853	0.1842	-0.1314	0.0387	-0.1525	-0.1712	-0.0375	-0.0626	-0.0756	-0.0502	0.1937	0.1951	-0.1346	0.0216	0.3102	0.1208	0.2487	0.0203	0.0386	-0.037	-0.0111	-0.0635	0.103	0.0084	-0.0601	0.5644	0.4479	0.4758	0.5778	-0.1203	-0.2107	0.0658
12.2667	-0.1019	0.0603	0.0141	0.0224	0.1538	0.1334	0.0536	-0.0148	0.0568	0.1489	-0.0694	-0.202	-0.3102	-0.1852	-0.0182	-0.0249	-0.0003	-0.08	0.1969	-0.1346	0.0126	-0.1476	-0.1641	-0.0141	-0.0844	-0.0749	-0.0319	0.1998	0.1949	-0.1456	0.0209	0.3108	0.0983	0.2379	0.0256	0.0451	-0.0323	-0.0057	-0.0584	0.0976	0.023	-0.0624	0.5623	0.4452	0.4764	0.5984	-0.1205	-0.2234	0.0648
12.3	-0.1041	0.0665	0.0314	0.0418	0.1725	0.126	0.0494	-0.0385	0.0533	0.1497	-0.0785	-0.2004	-0.3176	-0.1941	-0.0107	-0.0235	-0.0228	-0.0891	0.1995	-0.1345	-0.011	-0.1481	-0.1494	-0.0056	-0.0984	-0.0718	-0.0179	0.2038	0.1897	-0.1419	0.0141	0.3089	0.0828	0.2306	0.0287	0.047	-0.0269	0.003	-0.0544	0.0968	0.0404	-0.0602	0.5575	0.4376	0.4754	0.6058	-0.127	-0.23	0.0589
12.3333	-0.0996	0.0728	0.0582	0.0485	0.1887	0.1162	0.0362	-0.0572	0.0456	0.1527	-0.1017	-0.1929	-0.3229	-0.2006	-0.0144	-0.0342	-0.0389	-0.0933	0.1986	-0.1365	-0.0099	-0.1406	-0.1349	0.0041	-0.1121	-0.0631	0.0072	0.194	0.1781	-0.1575	0.0051	0.3078	0.0675	0.2287	0.0312	0.0518	-0.025	-0.0002	-0.0487	0.0993	0.0387	-0.0683	0.5452	0.4299	0.4752	0.5988	-0.1289	-0.2323	0.0537
12.3667	-0.0938	0.0745	0.0644	0.0345	0.1991	0.1064	0.0298	-0.0591	0.0366	0.1484	-0.1244	-0.1969	-0.3227	-0.1964	-0.0112	-0.0425	-0.0388	-0.0836	0.1856	-0.1351	0.0015	-0.1374	-0.1271	0.0034	-0.1281	-0.0614	0.0258	0.1881	0.1684	-0.1522	0.0044	0.3013	0.0472	0.2275	0.0295	0.0539	-0.0191	-0.0005	-0.0523	0.0951	0.0417	-0.082	0.5349	0.4305	0.4744	0.5917	-0.133	-0.236	0.0585
12.4	-0.0873	0.079	0.0724	0.018	0.205	0.1028	0.0236	-0.0352	0.0358	0.1446	-0.1398	-0.2049	-0.3084	-0.1918	-0.0117	-0.0481	-0.0508	-0.0876	0.1512	-0.1202	0.0065	-0.1219	-0.126	0.0108	-0.1124	-0.068	0.0553	0.1839	0.1638	-0.1741	-0.0059	0.2929	0.0379	0.2206	0.0265	0.0677	-0.0137	0.0014	-0.0452	0.096	0.0328	-0.0976	0.5327	0.4262	0.4745	0.5956	-0.135	-0.2348	0.0801
12.4333	-0.0833	0.0814	0.0771	0.0106	0.1923	0.0965	0.0167	-0.0355	0.0296	0.1353	-0.1559	-0.2039	-0.2881	-0.1799	-0.0128	-0.0571	-0.0501	-0.089	0.1223	-0.1106	0.011	-0.1093	-0.1299	0.001	-0.1271	-0.0838	0.0768	0.1789	0.1564	-0.1815	-0.0087	0.2935	0.0321	0.2111	0.0153	0.0736	-0.0083	-0.0054	-0.0394	0.1044	0.0315	-0.112	0.527	0.4145	0.4769	0.5934	-0.1388	-0.2339	0.0836
12.4667	-0.079	0.0801	0.0817	0.006	0.1686	0.0935	0.0171	-0.0322	0.0258	0.131	-0.144	-0.2004	-0.2655	-0.1817	-0.0119	-0.0708	-0.0618	-0.0862	0.1014	-0.1097	0.0201	-0.099	-0.1157	0.0048	-0.1291	-0.1017	0.087	0.179	0.1345	-0.1715	-0.0148	0.3008	0.0171	0.206	-0.0011	0.0802	-0.0002	-0.0044	-0.0349	0.1007	0.0255	-0.1174	0.5175	0.4094	0.4735	0.5834	-0.1419	-0.2328	0.0841
12.5	-0.076	0.0763	0.0818	0.0073	0.143	0.0978	0.0206	-0.0401	0.0185	0.1254	-0.1322	-0.1982	-0.256	-0.1724	-0.0082	-0.0877	-0.0717	-0.0883	0.0983	-0.0943	0.0268	-0.0946	-0.1234	-0.001	-0.1405	-0.121	0.0936	0.1802	0.1369	-0.1569	-0.0224	0.3014	0.0154	0.2043	-0.0121	0.0837	0.0014	0.0043	-0.0219	0.0901	0.0168	-0.1261	0.5006	0.4069	0.4661	0.5762	-0.1436	-0.2313	0.0725
12.5333	-0.0692	0.0797	0.1147	0.0111	0.1256	0.0968	0.0179	-0.0529	0.0121	0.1179	-0.1458	-0.1939	-0.2425	-0.1699	-0.0054	-0.0951	-0.0718	-0.0839	0.1039	-0.0516	0.0281	-0.093	-0.1314	-0.0088	-0.155	-0.1444	0.0815	0.1765	0.1396	-0.1322	-0.0129	0.2918	0.0177	0.205	-0.0191	0.0904	0.0101	0.0069	-0.0245	0.081	0.0116	-0.1421	0.4884	0.4039	0.4659	0.5615	-0.1451	-0.2283	0.0702
12.5667	-0.0634	0.0804	0.1101	0.0163	0.1166	0.104	0.0157	-0.0672	-0.0005	0.1143	-0.1554	-0.195	-0.2364	-0.1736	-0.005	-0.0966	-0.0664	-0.0862	0.1124	-0.0235	0.0237	-0.111	-0.1078	-0.0055	-0.1697	-0.1611	0.0832	0.1675	0.1339	-0.1198	-0.0143	0.2892	0.011	0.1899	-0.0226	0.0874	0.0162	0.0088	-0.0234	0.0589	0.0062	-0.1577	0.4807	0.3971	0.4711	0.5381	-0.1462	-0.2235	0.0811
12.6	-0.0548	0.0837	0.1206	0.0119	0.0921	0.0989	0.0188	-0.0772	-0.0111	0.1056	-0.1699	-0.2029	-0.2372	-0.1789	-0.0045	-0.0986	-0.059	-0.0832	0.136	0.012	0.0233	-0.133	-0.0971	-0.0267	-0.19	-0.168	0.092	0.168	0.1224	-0.1181	-0.0146	0.2731	0.0127	0.1728	-0.024	0.0906	0.0209	0.0075	-0.0297	0.052	0.0026	-0.1584	0.4707	0.385	0.4707	0.5197	-0.1444	-0.2197	0.0878
12.6333	-0.0447	0.0827	0.1179	0.0123	0.0827	0.0935	0.0194	-0.0883	-0.0197	0.0969	-0.1765	-0.2052	-0.2342	-0.167	-0.0065	-0.1062	-0.0716	-0.0703	0.1166	0.041	0.0193	-0.151	-0.0877	-0.0252	-0.1962	-0.1671	0.1012	0.172	0.1103	-0.1253	-0.0149	0.2702	0.0409	0.1524	-0.0248	0.0905	0.0294	0.0082	-0.0329	0.0381	-0.0042	-0.1624	0.4543	0.3711	0.462	0.5105	-0.1452	-0.2177	0.0826
12.6667	-0.0349	0.0703	0.1168	0.0249	0.0758	0.0729	0.0153	-0.1005	-0.0272	0.0946	-0.1843	-0.2235	-0.2289	-0.1569	-0.008	-0.1155	-0.0827	-0.0507	0.0978	0.0575	0.0194	-0.1827	-0.0473	-0.0224	-0.1919	-0.1609	0.1192	0.1731	0.0996	-0.1172	-0.0025	0.2745	0.017	0.1366	-0.0229	0.0924	0.0391	0.0055	-0.0418	0.0135	-0.0099	-0.1615	0.4335	0.3638	0.4575	0.4976	-0.1507	-0.2195	0.0702
12.7	-0.032	0.053	0.0759	0.0122	0.0724	0.0659	0.0123	-0.1153	-0.0332	0.0912	-0.1801	-0.1871	-0.2276	-0.143	-0.0162	-0.1195	-0.0939	-0.0398	0.1045	0.0622	0.0153	-0.2024	-0.0085	-0.0191	-0.1785	-0.1539	0.1264	0.1795	0.0619	-0.1014	0.0067	0.2653	0.0223	0.1231	-0.0296	0.0939	0.044	-0.0049	-0.0482	-0.0031	-0.0053	-0.1583	0.4264	0.3598	0.4506	0.4855	-0.1477	-0.2216	0.0702
12.7333	-0.0259	0.0304	0.0747	0.0174	0.0611	0.0703	0.0061	-0.1227	-0.0453	0.084	-0.1897	-0.1809	-0.2252	-0.1287	-0.0275	-0.104	-0.1028	-0.0364	0.1062	0.0651	0.0074	-0.2251	0.0237	-0.0208	-0.162	-0.1506	0.1273	0.1734	0.0522	-0.0895	0.0143	0.2495	0.0461	0.1045	-0.0348	0.0959	0.0395	0.0063	-0.0485	0.0064	-0.0016	-0.1405	0.4199	0.361	0.4402	0.4731	-0.1492	-0.2212	0.075
12.7667	-0.0221	0.0304	0.0639	0.0234	0.0528	0.0647	0.0006	-0.1311	-0.0528	0.0769	-0.2075	-0.1778	-0.2153	-0.132	-0.0375	-0.1043	-0.1105	-0.0356	0.1036	0.0693	-0.0008	-0.2328	0.03	-0.013	-0.1605	-0.14	0.1298	0.1637	0.0614	-0.0977	0.0214	0.2234	0.0504	0.0954	-0.0419	0.099	0.0351	0.0089	-0.0542	0.016	-0.0042	-0.1393	0.409	0.3621	0.4302	0.4558	-0.1518	-0.2221	0.0687
12.8	-0.0227	0.029	0.0627	0.0247	0.0452	0.0585	0.0087	-0.1274	-0.0532	0.0681	-0.2283	-0.1752	-0.2109	-0.1393	-0.0454	-0.1024	-0.0987	-0.037	0.0928	0.0694	-0.0028	-0.246	0.0352	-0.025	-0.1553	-0.1263	0.119	0.1588	0.0441	-0.0867	0.0316	0.1861	0.04	0.0844	-0.045	0.0986	0.0357	0.0122	-0.0619	0.015	-0.0145	-0.1444	0.4019	0.3702	0.4241	0.4465	-0.1538	-0.2242	0.0784
12.8333	-0.0226	0.0296	0.051	0.029	0.0201	0.0606	0.0164	-0.1283	-0.051	0.0603	-0.2659	-0.1666	-0.2158	-0.1393	-0.0439	-0.1106	-0.0927	-0.0376	0.0696	0.0638	0.0028	-0.2453	0.0439	-0.0268	-0.1398	-0.1188	0.1223	0.1544	0.0422	-0.073	0.0402	0.1591	0.0595	0.0618	-0.0451	0.0957	0.0395	0.0188	-0.0652	0.0132	-0.016	-0.1612	0.4121	0.3726	0.4175	0.4387	-0.1559	-0.2226	0.085
12.8667	-0.0205	0.0321	0.055	0.0261	0.0187	0.0421	0.0153	-0.1215	-0.0502	0.0496	-0.2983	-0.1621	-0.215	-0.1456	-0.0411	-0.117	-0.0931	-0.0403	0.0521	0.0571	0.0075	-0.2459	0.0342	-0.0302	-0.1406	-0.1106	0.1021	0.1467	0.0351	-0.0713	0.047	0.1303	0.0487	0.02	-0.047	0.0894	0.0422	0.0082	-0.0672	-0.015	-0.008	-0.1736	0.4213	0.3785	0.4078	0.4271	-0.1657	-0.225	0.0936
12.9	-0.0179	0.0306	0.0296	0.0255	0.0239	0.0208	0.016	-0.1197	-0.0442	0.0377	-0.3209	-0.1579	-0.2171	-0.1505	-0.0349	-0.1283	-0.086	-0.0444	0.0199	0.0516	0.0068	-0.2398	0.0347	-0.0297	-0.1399	-0.1104	0.0996	0.1377	0.0228	-0.0777	0.052	0.1103	0.0456	-0.0043	-0.0456	0.0845	0.0473	2.863e-06	-0.0699	-0.0287	-0.0119	-0.1763	0.4381	0.3782	0.39	0.4149	-0.1659	-0.2289	0.1006
12.9333	-0.0158	0.0352	0.0139	0.0113	0.0228	0.0176	0.0239	-0.1236	-0.0382	0.025	-0.3365	-0.1507	-0.2158	-0.1539	-0.0283	-0.1273	-0.0788	-0.0472	0.0013	0.0397	0.004	-0.2456	0.0321	-0.0298	-0.1402	-0.1169	0.0875	0.126	0.0214	-0.0839	0.0482	0.1129	0.0425	-0.016	-0.0469	0.0823	0.0513	0.0056	-0.0612	-0.0626	-0.0278	-0.1797	0.4552	0.3724	0.3779	0.394	-0.164	-0.2296	0.1101
12.9667	-0.0151	0.0409	0.0071	0.0225	0.0083	0.0024	0.0266	-0.1397	-0.034	0.0079	-0.3358	-0.1487	-0.2182	-0.1553	-0.0209	-0.1247	-0.0672	-0.0488	-0.0035	0.0484	0.0055	-0.2536	0.0549	-0.0317	-0.134	-0.1192	0.0698	0.1114	0.0178	-0.0852	0.0448	0.104	0.0442	-0.0185	-0.0506	0.0822	0.0548	0.0162	-0.0605	-0.093	-0.011	-0.1655	0.4608	0.364	0.375	0.3733	-0.174	-0.2264	0.1232
13	-0.014	0.0325	0.0152	0.048	-0.0026	-0.0134	0.0172	-0.1486	-0.0219	-0.0037	-0.3348	-0.1582	-0.2226	-0.1512	0.0018	-0.1196	-0.0387	-0.0579	-0.0148	0.0486	0.0164	-0.2506	0.0874	-0.037	-0.1461	-0.1232	0.0817	0.0979	0.0137	-0.0793	0.0419	0.102	0.0316	-0.0127	-0.0351	0.0829	0.0506	0.0297	-0.0554	-0.1058	-0.0022	-0.1665	0.4755	0.3609	0.3676	0.3478	-0.1804	-0.2293	0.1337
13.0333	-0.0066	0.0297	-0.0052	0.0623	-0.0059	-0.0324	0.0001	-0.1444	-0.0178	-0.0159	-0.3355	-0.1533	-0.2193	-0.154	0.0153	-0.1311	-0.0292	-0.0674	-0.0172	0.0393	0.0191	-0.2488	0.1139	-0.04	-0.1453	-0.1251	0.0678	0.0991	-0.0017	-0.0808	0.0427	0.0969	0.0221	-0.0069	-0.0267	0.0763	0.0506	0.0402	-0.0587	-0.1136	0.0031	-0.1563	0.4836	0.3613	0.362	0.3274	-0.1825	-0.2282	0.1456
13.0667	-0.0004	0.031	-0.0232	0.0761	0.0012	-0.0361	-0.0022	-0.1365	-0.0178	-0.0267	-0.3382	-0.1569	-0.2205	-0.1575	0.038	-0.1346	-0.027	-0.0735	-0.033	0.0222	0.021	-0.2365	0.1319	-0.0349	-0.1396	-0.1252	0.0663	0.1006	-0.0162	-0.0751	0.0393	0.0905	0.0188	-0.0007	-0.0217	0.0834	0.0514	0.0522	-0.0614	-0.1245	0.0112	-0.1573	0.4937	0.3666	0.3632	0.3066	-0.1758	-0.2302	0.1537
13.1	0.0101	0.0378	0.0018	0.0794	0.0112	-0.0366	-0.0148	-0.1456	-0.0115	-0.0327	-0.3344	-0.1633	-0.2278	-0.1583	0.0542	-0.1328	-0.0145	-0.0713	-0.0483	-0.0007	0.0183	-0.2265	0.1397	-0.0352	-0.1338	-0.1249	0.0533	0.0987	-0.0208	-0.0819	0.0414	0.0912	0.0126	0.0115	-0.0364	0.0801	0.0477	0.0658	-0.0662	-0.1073	0.0266	-0.166	0.4897	0.3675	0.3623	0.2893	-0.1719	-0.2283	0.1505
13.1333	0.0221	0.0287	0.0074	0.0892	0.0134	-0.0361	-0.0469	-0.1381	-0.0165	-0.0317	-0.3247	-0.1658	-0.2401	-0.1544	0.0645	-0.1269	0.0056	-0.0764	-0.0389	-0.011	0.0158	-0.2042	0.1416	-0.03	-0.1226	-0.1264	0.0489	0.0897	-0.0269	-0.0696	0.0478	0.0857	-0.0052	0.028	-0.044	0.0753	0.0516	0.074	-0.0724	-0.0968	0.0311	-0.1736	0.4881	0.3701	0.3659	0.2788	-0.1687	-0.2268	0.1456
13.1667	0.0359	0.0223	-0.001	0.0876	0.025	-0.0331	-0.0603	-0.1368	-0.0144	-0.0264	-0.2987	-0.1679	-0.2497	-0.1624	0.0719	-0.1266	0.0167	-0.0828	-0.0454	-0.0275	0.0081	-0.2103	0.1315	-0.0324	-0.1181	-0.1265	0.0444	0.0951	-0.0343	-0.092	0.0516	0.0735	-0.029	0.0485	-0.0373	0.0792	0.0514	0.0656	-0.0681	-0.091	0.0293	-0.1876	0.4755	0.3714	0.3676	0.2567	-0.1659	-0.2264	0.1397
13.2	0.0463	0.0253	-0.0224	0.0896	0.0337	-0.032	-0.0644	-0.137	-0.0126	-0.0168	-0.2781	-0.1891	-0.2526	-0.173	0.0723	-0.1255	0.0228	-0.0885	-0.0389	-0.0552	-0.0143	-0.2107	0.1219	-0.0518	-0.0979	-0.1253	0.0398	0.0824	-0.034	-0.1068	0.0722	0.043	-0.0534	0.0635	-0.0441	0.0792	0.0505	0.0756	-0.0597	-0.09	0.0164	-0.202	0.4726	0.3632	0.3598	0.252	-0.1665	-0.2267	0.1354
13.2333	0.0644	0.0171	-0.0415	0.0843	0.0405	-0.0288	-0.066	-0.1327	-0.0183	-0.0109	-0.2572	-0.1825	-0.2613	-0.188	0.0794	-0.1228	0.0279	-0.0974	-0.0301	-0.0682	-0.0261	-0.2227	0.1106	-0.0772	-0.0804	-0.1251	0.0559	0.09	-0.0173	-0.1095	0.0755	0.0401	-0.0589	0.0719	-0.0357	0.0791	0.0511	0.0775	-0.0587	-0.0785	0.0164	-0.2058	0.4701	0.3623	0.3614	0.2577	-0.1667	-0.2225	0.1308
13.2667	0.0766	0.027	-0.0437	0.0763	0.053	-0.0302	-0.0692	-0.1265	-0.0211	-0.0067	-0.2475	-0.1734	-0.2774	-0.1996	0.0831	-0.1149	0.0308	-0.099	-0.0399	-0.0918	-0.0252	-0.2255	0.1057	-0.0798	-0.0755	-0.1322	0.0566	0.0942	0.0084	-0.1054	0.0754	0.0296	-0.0858	0.0741	-0.0297	0.0794	0.0469	0.0828	-0.0442	-0.0752	0.0512	-0.2068	0.4564	0.3617	0.3652	0.2571	-0.1633	-0.2186	0.1305
13.3	0.0818	0.0414	-0.1226	0.0716	0.0578	-0.0326	-0.07	-0.1224	-0.0251	-0.0043	-0.2588	-0.1652	-0.2834	-0.2125	0.0922	-0.1104	0.0267	-0.0896	-0.0573	-0.1131	-0.0285	-0.2246	0.09	-0.0802	-0.07	-0.1433	0.0522	0.1192	0.0203	-0.0979	0.062	0.0085	-0.11	0.0764	-0.02	0.08	0.0398	0.0802	-0.0362	-0.0763	0.0694	-0.2134	0.454	0.3508	0.3707	0.2596	-0.1602	-0.2167	0.1303
13.3333	0.0845	0.0378	-0.1305	0.0699	0.0556	-0.0374	-0.067	-0.1184	-0.0336	-0.003	-0.2545	-0.1599	-0.2828	-0.2168	0.0977	-0.1081	0.0319	-0.0916	-0.0717	-0.1309	-0.0255	-0.2195	0.0753	-0.0912	-0.0496	-0.1458	0.0509	0.1405	0.0102	-0.0932	0.0603	0.0003	-0.1296	0.0719	-0.016	0.0776	0.0408	0.0847	-0.0334	-0.0799	0.0791	-0.2197	0.4578	0.3392	0.3713	0.2573	-0.1616	-0.2122	0.1245
13.3667	0.0817	0.0359	-0.0869	0.068	0.0395	-0.0431	-0.0603	-0.1016	-0.0378	-0.0053	-0.244	-0.1599	-0.2865	-0.2279	0.0899	-0.1114	0.0336	-0.0944	-0.0866	-0.1345	-0.0232	-0.2135	0.0541	-0.0951	-0.0403	-0.1503	0.0458	0.1542	-0.0175	-0.0906	0.0561	-0.0092	-0.1259	0.0732	-0.0106	0.073	0.0483	0.0805	-0.0246	-0.0798	0.0852	-0.2259	0.4552	0.328	0.3693	0.261	-0.1709	-0.2072	0.1211
13.4	0.0771	0.0484	-0.0393	0.0559	0.0331	-0.044	-0.0731	-0.0841	-0.0403	-0.0049	-0.2441	-0.1651	-0.2923	-0.2317	0.0918	-0.1191	0.0282	-0.0915	-0.096	-0.1525	-0.0209	-0.1988	0.0442	-0.0941	-0.0306	-0.1563	0.0376	0.1475	-0.0122	-0.089	0.0516	-0.0062	-0.1351	0.0788	-0.0153	0.0666	0.0476	0.0775	-0.0182	-0.0779	0.0936	-0.2236	0.4602	0.3018	0.3565	0.2601	-0.1737	-0.2113	0.1148
13.4333	0.0366	0.0506	-0.0051	0.0551	0.0271	-0.0292	-0.0868	-0.0775	-0.0464	-0.0117	-0.2303	-0.1688	-0.2973	-0.2393	0.0913	-0.1231	0.0199	-0.1006	-0.1045	-0.1599	-0.0093	-0.1987	0.0339	-0.1021	-0.0304	-0.1609	0.041	0.1435	-0.0251	-0.0982	0.0423	0.014	-0.137	0.0838	-0.0245	0.0589	0.0442	0.072	-0.0109	-0.0785	0.0984	-0.2211	0.4598	0.2801	0.3526	0.252	-0.1803	-0.2139	0.1114
13.4667	0.027	0.0629	-0.0418	0.0495	0.0209	-0.0191	-0.0813	-0.077	-0.0566	-0.0143	-0.2467	-0.1703	-0.3038	-0.2382	0.0723	-0.1307	0.0195	-0.0986	-0.1268	-0.1674	0.0105	-0.2012	0.0097	-0.1084	-0.0318	-0.1622	0.0563	0.1398	-0.0385	-0.0895	0.04	0.0233	-0.15	0.0883	-0.0377	0.0543	0.038	0.0652	-0.0087	-0.0733	0.0995	-0.212	0.4579	0.2627	0.3479	0.2566	-0.1827	-0.2205	0.1077
13.5	0.0188	0.0664	-0.1059	0.0445	0.0032	-0.0145	-0.0759	-0.0825	-0.0636	-0.0145	-0.2642	-0.1751	-0.3102	-0.2397	0.0681	-0.1402	0.0095	-0.0892	-0.1393	-0.1658	0.026	-0.2105	-0.0046	-0.1159	-0.0437	-0.1619	0.0694	0.1287	-0.0373	-0.0973	0.04	0.0329	-0.1488	0.0882	-0.0447	0.0444	0.0353	0.0492	-0.0155	-0.0447	0.0973	-0.1986	0.4566	0.2463	0.3532	0.2527	-0.187	-0.2266	0.1009
13.5333	0.0151	0.0679	-0.1189	0.038	-0.0026	-0.0046	-0.0659	-0.089	-0.0672	-0.0199	-0.2632	-0.1828	-0.3081	-0.2432	0.0705	-0.1544	0.0035	-0.0909	-0.1535	-0.1682	0.0402	-0.2225	-0.0069	-0.1289	-0.0423	-0.1683	0.0749	0.1167	-0.0283	-0.1004	0.0362	0.0363	-0.1422	0.0937	-0.0414	0.0309	0.026	0.0337	-0.0104	-0.0116	0.1042	-0.1989	0.453	0.2403	0.3554	0.2529	-0.1863	-0.2329	0.0936
13.5667	0.0088	0.0665	-0.1139	0.0268	-0.016	0.0019	-0.0591	-0.0989	-0.0744	-0.0179	-0.2662	-0.1855	-0.3108	-0.2384	0.0748	-0.1694	-0.0074	-0.0912	-0.1587	-0.1711	0.0478	-0.2298	-0.0088	-0.1323	-0.053	-0.1693	0.0924	0.1107	-0.0197	-0.102	0.0383	0.049	-0.125	0.0932	-0.0434	0.0236	0.0211	0.017	-0.0042	-0.0032	0.1096	-0.1949	0.4423	0.2373	0.3567	0.2562	-0.184	-0.2347	0.0854
13.6	0.0101	0.0706	-0.1196	0.0168	-0.0204	0.0177	-0.0441	-0.1124	-0.073	-0.0149	-0.2705	-0.1973	-0.3095	-0.2334	0.0721	-0.1759	-0.0237	-0.0956	-0.1421	-0.173	0.0592	-0.2496	-0.007	-0.1366	-0.0556	-0.1665	0.1063	0.1051	-0.0048	-0.1082	0.0353	0.0498	-0.112	0.0999	-0.044	0.0232	0.0171	0.0023	0.0024	0.0033	0.108	-0.1914	0.436	0.2399	0.3557	0.2598	-0.1836	-0.2354	0.0788
13.6333	0.0056	0.0724	-0.1218	-0.0042	-0.0239	0.0193	-0.0491	-0.1327	-0.0682	-0.0143	-0.2799	-0.2048	-0.3094	-0.2249	0.0596	-0.1796	-0.0381	-0.0983	-0.1188	-0.1769	0.0697	-0.2764	-0.0034	-0.1325	-0.0585	-0.1603	0.1112	0.1031	-0.0014	-0.1022	0.026	0.0537	-0.1207	0.0901	-0.0472	0.0203	0.013	-0.0006	0.018	0.0125	0.1094	-0.1843	0.4165	0.2419	0.3529	0.2653	-0.1767	-0.2364	0.0749
13.6667	-0.0018	0.0735	-0.1268	-0.025	-0.0272	0.0213	-0.0588	-0.1527	-0.0697	-0.0199	-0.3014	-0.2109	-0.314	-0.2175	0.0482	-0.1798	-0.0331	-0.1047	-0.1025	-0.169	0.0915	-0.2731	-0.0131	-0.1207	-0.0656	-0.1563	0.1012	0.1048	0.0158	-0.0979	0.0247	0.0473	-0.113	0.0813	-0.0457	0.0187	0.0029	0.0039	0.0199	0.0245	0.1109	-0.1767	0.4062	0.2473	0.3417	0.268	-0.184	-0.2419	0.0715
13.7	-0.012	0.077	-0.14	-0.0386	-0.0338	0.0157	-0.0817	-0.1664	-0.0651	-0.0195	-0.3133	-0.2092	-0.3193	-0.214	0.0445	-0.1767	-0.0303	-0.1168	-0.0928	-0.1689	0.12	-0.2683	-0.0162	-0.1157	-0.0749	-0.1565	0.1009	0.1217	0.0186	-0.0855	0.0236	0.0439	-0.1067	0.0858	-0.0467	0.0034	-0.0093	0.0077	0.0262	0.0377	0.1133	-0.1672	0.3922	0.2478	0.3334	0.3059	-0.1861	-0.2449	0.0742
13.7333	-0.0177	0.082	-0.1556	-0.0474	-0.0347	0.0118	-0.0993	-0.1535	-0.0608	-0.0205	-0.3442	-0.1877	-0.3203	-0.208	0.0395	-0.1741	-0.0287	-0.1181	-0.0964	-0.1634	0.1449	-0.2495	-0.0199	-0.1256	-0.0827	-0.1545	0.1045	0.1458	0.0208	-0.0671	0.0154	0.0362	-0.0991	0.098	-0.0434	-0.0057	-0.0224	0.019	0.0318	0.051	0.1057	-0.164	0.3841	0.2542	0.3315	0.3242	-0.1871	-0.2452	0.0772
13.7667	-0.0226	0.0806	-0.1488	-0.069	-0.0332	-0.0014	-0.1002	-0.1533	-0.0596	-0.0242	-0.3428	-0.1814	-0.32	-0.2094	0.031	-0.1674	-0.0347	-0.1267	-0.0998	-0.1544	0.1693	-0.251	-0.0224	-0.1331	-0.0849	-0.1551	0.1185	0.1549	0.0237	-0.0583	0.0156	0.0404	-0.1069	0.1039	-0.0472	-0.0139	-0.0255	0.027	0.0385	0.0632	0.11	-0.1637	0.3922	0.257	0.3259	0.3332	-0.1896	-0.2468	0.0847
13.8	-0.029	0.0785	-0.1452	-0.068	-0.0268	-0.0026	-0.1062	-0.1565	-0.0693	-0.0323	-0.3354	-0.1928	-0.3142	-0.2093	0.0185	-0.1638	-0.0325	-0.1213	-0.1102	-0.1604	0.1873	-0.2356	-0.0142	-0.1461	-0.0891	-0.1541	0.1217	0.1535	0.0085	-0.0383	0.0192	0.0412	-0.1076	0.1098	-0.0505	-0.0149	-0.034	0.033	0.0371	0.0733	0.1071	-0.1519	0.3793	0.2551	0.3168	0.3275	-0.1913	-0.2449	0.089
13.8333	-0.038	0.0822	-0.1486	-0.0663	-0.0206	-0.0034	-0.1165	-0.1684	-0.0726	-0.0356	-0.3331	-0.2147	-0.3107	-0.2172	0.011	-0.1621	-0.0263	-0.1253	-0.1261	-0.1637	0.1949	-0.2029	-0.0058	-0.1409	-0.0991	-0.1623	0.117	0.1498	0.0021	-0.0352	0.026	0.0394	-0.1086	0.1079	-0.0637	-0.0144	-0.0418	0.0381	0.0427	0.0774	0.1088	-0.1532	0.3873	0.2478	0.3113	0.3247	-0.1949	-0.2424	0.0918
13.8667	-0.055	0.0924	-0.1581	-0.0597	-0.0215	-0.0013	-0.125	-0.1853	-0.0719	-0.0403	-0.334	-0.2295	-0.3053	-0.2341	0.0074	-0.1629	-0.0205	-0.1297	-0.1266	-0.1864	0.2047	-0.2144	-0.0103	-0.1388	-0.1087	-0.1644	0.1299	0.162	-0.0045	-0.0306	0.0336	0.0264	-0.1103	0.1068	-0.075	-0.0193	-0.0499	0.0395	0.0439	0.0824	0.112	-0.155	0.3769	0.2414	0.3091	0.3201	-0.1984	-0.2345	0.0948
13.9	-0.0542	0.0951	-0.1499	-0.0567	-0.0224	-0.004	-0.139	-0.1925	-0.0708	-0.0444	-0.3252	-0.2391	-0.2955	-0.2502	0.0076	-0.1573	-0.0221	-0.13	-0.1295	-0.1787	0.2149	-0.2074	-0.0135	-0.1416	-0.121	-0.168	0.1438	0.1767	-0.0113	-0.0377	0.0406	0.0145	-0.1146	0.106	-0.0833	-0.0188	-0.0513	0.0363	0.0391	0.0896	0.1123	-0.1445	0.3663	0.2388	0.3129	0.3236	-0.2021	-0.234	0.0881
13.9333	-0.0735	0.0983	-0.1453	-0.0514	-0.015	-0.0056	-0.1426	-0.1942	-0.0709	-0.0441	-0.3157	-0.2399	-0.2917	-0.2659	0.0099	-0.149	-0.0174	-0.1353	-0.1304	-0.1842	0.21	-0.1978	-0.0137	-0.1221	-0.1237	-0.1706	0.1433	0.1966	-0.0165	-0.0504	0.049	0.0109	-0.1089	0.1001	-0.0887	-0.0149	-0.0483	0.0329	0.0289	0.0911	0.1196	-0.1417	0.347	0.2413	0.317	0.3326	-0.2068	-0.2348	0.0824
13.9667	-0.0724	0.1024	-0.1458	-0.0426	-0.0117	-0.0142	-0.1491	-0.1907	-0.065	-0.051	-0.3118	-0.2515	-0.2897	-0.261	0.0123	-0.142	-0.0109	-0.1395	-0.1277	-0.1827	0.1952	-0.1943	-0.0185	-0.1134	-0.1189	-0.1708	0.1522	0.2032	-0.013	-0.073	0.0524	0.0148	-0.1055	0.0998	-0.0913	-0.0116	-0.0489	0.0357	0.0206	0.0937	0.1167	-0.139	0.3576	0.2437	0.32	0.3351	-0.2128	-0.2392	0.0814
14	-0.0698	0.1028	-0.1288	-0.0312	0.0025	-0.0185	-0.1522	-0.191	-0.0602	-0.0599	-0.2996	-0.2511	-0.2856	-0.2458	0.0107	-0.1491	-0.0125	-0.1484	-0.1361	-0.179	0.1858	-0.1875	-0.0216	-0.1309	-0.1121	-0.1675	0.1531	0.211	0.0007	-0.0911	0.0531	0.0186	-0.1013	0.1059	-0.0923	-0.0034	-0.0456	0.0406	0.0136	0.0989	0.1072	-0.1306	0.3621	0.244	0.3132	0.3434	-0.2184	-0.2453	0.086
14.0333	-0.0749	0.1028	-0.129	-0.0283	0.0087	-0.0279	-0.1558	-0.1939	-0.054	-0.0651	-0.2859	-0.2627	-0.2822	-0.2318	0.0121	-0.15	-0.013	-0.1426	-0.1416	-0.1814	0.1814	-0.1891	-0.0189	-0.129	-0.1134	-0.1608	0.1481	0.2267	-0.0116	-0.0823	0.0573	0.0145	-0.0942	0.0998	-0.0892	-0.0011	-0.0444	0.0434	0.005	0.1075	0.1077	-0.1111	0.3751	0.2465	0.3111	0.3435	-0.2221	-0.2529	0.0917
14.0667	-0.0804	0.1078	-0.1103	-0.0261	0.0208	-0.0367	-0.1312	-0.193	-0.0445	-0.074	-0.2842	-0.2639	-0.2809	-0.2285	0.0145	-0.1522	-0.0027	-0.1407	-0.1512	-0.1994	0.1715	-0.1802	-0.0231	-0.1319	-0.1104	-0.1558	0.1329	0.2398	-0.0049	-0.0805	0.0534	0.0121	-0.0908	0.0941	-0.0913	-0.0004	-0.0403	0.0443	-0.0025	0.1127	0.1078	-0.0907	0.3806	0.2424	0.3136	0.3429	-0.2213	-0.2591	0.0891
14.1	-0.0805	0.1105	-0.0933	-0.038	0.0276	-0.0491	-0.1118	-0.1919	-0.0403	-0.0851	-0.2872	-0.2625	-0.289	-0.2346	0.0155	-0.1451	0.0092	-0.1377	-0.1761	-0.2028	0.1649	-0.1576	-0.0233	-0.1366	-0.1023	-0.1481	0.138	0.2399	-0.0079	-0.0819	0.0441	0.0116	-0.0813	0.1026	-0.1006	-0.0104	-0.0383	0.0454	-0.0102	0.1143	0.1022	-0.0776	0.3734	0.2422	0.3155	0.3433	-0.2253	-0.2629	0.0919
14.1333	-0.0797	0.1092	-0.1285	-0.0455	0.0267	-0.0511	-0.1042	-0.1933	-0.039	-0.0934	-0.2796	-0.2596	-0.2886	-0.2267	0.0158	-0.138	0.0203	-0.1326	-0.1811	-0.2015	0.1553	-0.1481	-0.0442	-0.1307	-0.1017	-0.1452	0.1142	0.2361	-0.0059	-0.0864	0.0318	0.0203	-0.0675	0.1098	-0.1064	-0.0182	-0.0365	0.0461	-0.0159	0.1205	0.0974	-0.0714	0.373	0.2418	0.3135	0.3403	-0.2342	-0.2621	0.0943
14.1667	-0.0704	0.0983	-0.1465	-0.047	0.0183	-0.0556	-0.1082	-0.1899	-0.0346	-0.0963	-0.285	-0.2572	-0.2814	-0.2211	0.0168	-0.1397	0.0255	-0.1299	-0.1954	-0.1643	0.1524	-0.1405	-0.0671	-0.1405	-0.1074	-0.142	0.0634	0.2387	-0.0094	-0.0928	0.0271	0.0262	-0.0577	0.1205	-0.112	-0.0248	-0.0424	0.0464	-0.0332	0.1244	0.0929	-0.0702	0.3785	0.2475	0.3142	0.3376	-0.2359	-0.2624	0.1066
14.2	-0.0644	0.0955	-0.1324	-0.0564	0.0079	-0.0507	-0.1224	-0.1831	-0.0344	-0.1	-0.2839	-0.2552	-0.2689	-0.2135	0.0132	-0.1427	0.0295	-0.1262	-0.2039	-0.1596	0.1681	-0.1299	-0.088	-0.1375	-0.0961	-0.1371	0.0524	0.2421	-0.0097	-0.0994	0.0284	0.033	-0.0454	0.1196	-0.1119	-0.0349	-0.0453	0.0469	-0.0545	0.1188	0.0928	-0.0666	0.3853	0.2557	0.3153	0.3376	-0.2333	-0.2582	0.1116
14.2333	-0.0615	0.0976	-0.1377	-0.0739	-0.0089	-0.0505	-0.1333	-0.183	-0.0325	-0.0981	-0.2723	-0.2548	-0.2556	-0.2132	0.0073	-0.1394	0.0236	-0.133	-0.2134	-0.173	0.1622	-0.1254	-0.1065	-0.1318	-0.0937	-0.1351	0.0418	0.2388	-0.0262	-0.0872	0.0274	0.0501	-0.0433	0.1279	-0.109	-0.0416	-0.0465	0.0485	-0.0672	0.1187	0.0983	-0.0687	0.3849	0.2603	0.321	0.3287	-0.235	-0.254	0.1173
14.2667	-0.0535	0.0991	-0.1419	-0.0853	-0.0111	-0.0465	-0.1428	-0.1828	-0.0459	-0.0897	-0.269	-0.2543	-0.244	-0.2239	0.0012	-0.1386	0.0199	-0.1408	-0.2222	-0.17	0.1751	-0.1168	-0.1329	-0.1346	-0.1021	-0.1426	0.0436	0.2423	-0.0382	-0.0883	0.0205	0.0598	-0.0536	0.1395	-0.1058	-0.057	-0.0491	0.0475	-0.0782	0.119	0.0944	-0.0731	0.3882	0.2631	0.3259	0.3179	-0.2357	-0.2489	0.1211
14.3	-0.059	0.0988	-0.1432	-0.0888	-0.0137	-0.0419	-0.1464	-0.1846	-0.0465	-0.0859	-0.2643	-0.2475	-0.2446	-0.2323	0.0015	-0.1209	0.016	-0.1434	-0.2378	-0.1686	0.1699	-0.1102	-0.1539	-0.1267	-0.1135	-0.1565	0.0467	0.2434	-0.0399	-0.0665	0.0127	0.0783	-0.0489	0.1461	-0.0978	-0.0715	-0.0546	0.0464	-0.0847	0.1207	0.096	-0.0822	0.39	0.261	0.3269	0.3129	-0.2388	-0.2483	0.1217
14.3333	-0.0659	0.0984	-0.1348	-0.1005	-0.0194	-0.0402	-0.1419	-0.1813	-0.0514	-0.0788	-0.2638	-0.242	-0.2496	-0.2365	0.0101	-0.1203	0.0167	-0.1607	-0.2552	-0.1705	0.1782	-0.1026	-0.171	-0.1204	-0.1285	-0.1699	0.056	0.2456	-0.034	-0.0728	0.0024	0.086	-0.0493	0.14	-0.0959	-0.0741	-0.0543	0.048	-0.0864	0.1153	0.0888	-0.0896	0.3949	0.2579	0.3219	0.3162	-0.2401	-0.2459	0.1217
14.3667	-0.0716	0.103	-0.154	-0.1022	-0.027	-0.0427	-0.1439	-0.181	-0.0655	-0.0697	-0.267	-0.2415	-0.2645	-0.2582	0.0242	-0.1251	0.0241	-0.1663	-0.2643	-0.172	0.1689	-0.0987	-0.181	-0.1202	-0.1291	-0.1783	0.0661	0.241	-0.0305	-0.0842	-0.0041	0.0914	-0.0536	0.1265	-0.0941	-0.0735	-0.0562	0.0545	-0.0807	0.114	0.0882	-0.0947	0.4023	0.2517	0.3242	0.3168	-0.2447	-0.2495	0.1243
14.4	-0.0796	0.1056	-0.1335	-0.1076	-0.0298	-0.038	-0.1445	-0.1895	-0.0542	-0.0607	-0.275	-0.2332	-0.2806	-0.2707	0.0407	-0.1436	0.0308	-0.1642	-0.2679	-0.1691	0.188	-0.0936	-0.1911	-0.1323	-0.1274	-0.1862	0.0717	0.2276	-0.0494	-0.0933	-0.011	0.0945	-0.0603	0.1225	-0.095	-0.0763	-0.0531	0.0585	-0.0812	0.1153	0.0833	-0.0889	0.3948	0.2413	0.3284	0.313	-0.2492	-0.2518	0.1304
14.4333	-0.0787	0.1106	-0.1402	-0.1107	-0.0264	-0.0372	-0.1374	-0.197	-0.055	-0.0532	-0.2817	-0.2279	-0.287	-0.2687	0.0527	-0.1508	0.0359	-0.1668	-0.2606	-0.1612	0.16	-0.0924	-0.1995	-0.1543	-0.1239	-0.1923	0.0848	0.2138	-0.07	-0.0977	-0.0226	0.0926	-0.0595	0.1208	-0.1001	-0.0715	-0.0544	0.0578	-0.0764	0.1118	0.0792	-0.0908	0.3893	0.2306	0.3154	0.3114	-0.2513	-0.2554	0.136
14.4667	-0.0788	0.1079	-0.1036	-0.1152	-0.0325	-0.0477	-0.1297	-0.1948	-0.0553	-0.0493	-0.2858	-0.2262	-0.291	-0.2688	0.0708	-0.1541	0.0354	-0.1696	-0.2558	-0.1434	0.153	-0.0877	-0.2109	-0.167	-0.1125	-0.1961	0.0927	0.1863	-0.0896	-0.1166	-0.0341	0.0902	-0.0584	0.1084	-0.0976	-0.0728	-0.0599	0.065	-0.0745	0.1084	0.077	-0.0882	0.3792	0.2218	0.3008	0.315	-0.2491	-0.2585	0.1452
14.5	-0.0778	0.0972	-0.1283	-0.1118	-0.0326	-0.0441	-0.1218	-0.1929	-0.0735	-0.0439	-0.2992	-0.2248	-0.2973	-0.2544	0.0817	-0.1588	0.0302	-0.1777	-0.2857	-0.1229	0.1532	-0.1089	-0.2169	-0.1733	-0.1153	-0.2005	0.1004	0.173	-0.1166	-0.1234	-0.0441	0.0854	-0.0608	0.0995	-0.1025	-0.0675	-0.0584	0.0783	-0.0637	0.1089	0.0838	-0.0887	0.3782	0.2233	0.2924	0.3161	-0.2459	-0.2609	0.1528
14.5333	-0.0813	0.0832	-0.1208	-0.1085	-0.0355	-0.039	-0.1141	-0.1984	-0.0776	-0.0391	-0.3125	-0.2225	-0.3003	-0.2504	0.0735	-0.1628	0.0368	-0.1826	-0.2849	-0.1051	0.1643	-0.1035	-0.2289	-0.1823	-0.1249	-0.2	0.0998	0.1577	-0.1326	-0.1277	-0.0541	0.0851	-0.0592	0.0832	-0.1016	-0.0715	-0.0598	0.0889	-0.0653	0.1091	0.0882	-0.0952	0.3774	0.2218	0.293	0.3201	-0.2489	-0.259	0.1626
14.5667	-0.0832	0.0708	-0.108	-0.0771	-0.042	-0.0368	-0.1102	-0.1955	-0.0734	-0.0348	-0.3238	-0.2209	-0.2989	-0.2487	0.0587	-0.1695	0.058	-0.2005	-0.2815	-0.1048	0.1589	-0.0919	-0.2422	-0.1735	-0.1293	-0.1927	0.0985	0.1447	-0.1407	-0.125	-0.0629	0.0726	-0.0658	0.0656	-0.1007	-0.0587	-0.0601	0.0939	-0.0597	0.1115	0.0889	-0.0935	0.3741	0.2193	0.2916	0.3296	-0.2398	-0.2534	0.1682
14.6	-0.082	0.064	-0.1083	-0.0594	-0.0501	-0.026	-0.1083	-0.1934	-0.0813	-0.0325	-0.328	-0.2219	-0.3004	-0.2492	0.0513	-0.1722	0.0581	-0.2091	-0.2764	-0.1187	0.1555	-0.092	-0.2359	-0.1681	-0.1315	-0.1926	0.1063	0.1317	-0.1533	-0.1289	-0.0705	0.0533	-0.0682	0.0576	-0.0941	-0.0547	-0.0581	0.095	-0.0546	0.1185	0.0899	-0.0906	0.3768	0.2131	0.2827	0.3253	-0.2343	-0.2538	0.1679
14.6333	-0.0925	0.0586	-0.1131	-0.0422	-0.0553	-0.0259	-0.1094	-0.1937	-0.0941	-0.0296	-0.3322	-0.2348	-0.3082	-0.2534	0.0458	-0.1873	0.0527	-0.2186	-0.2445	-0.1293	0.1548	-0.1049	-0.2285	-0.1717	-0.1281	-0.1968	0.1136	0.1198	-0.1526	-0.1298	-0.0822	0.0502	-0.0755	0.0466	-0.0883	-0.056	-0.0532	0.0938	-0.0531	0.1185	0.0672	-0.0861	0.3733	0.2077	0.2628	0.3252	-0.2269	-0.2546	0.1759
14.6667	-0.0891	0.0494	-0.1282	-0.0325	-0.0711	-0.0236	-0.1123	-0.1938	-0.1139	-0.0277	-0.341	-0.225	-0.3209	-0.2522	0.0446	-0.2069	0.0393	-0.2264	-0.2443	-0.1363	0.1428	-0.1185	-0.2249	-0.1677	-0.1383	-0.1961	0.1172	0.1036	-0.1467	-0.136	-0.0743	0.0592	-0.0868	0.0332	-0.0864	-0.0505	-0.059	0.0907	-0.0581	0.1174	0.0464	-0.0846	0.3646	0.207	0.2457	0.3253	-0.216	-0.2524	0.1784
14.7	-0.0833	0.0419	-0.1248	-0.0293	-0.0963	-0.0258	-0.1207	-0.2006	-0.1168	-0.0256	-0.3439	-0.2319	-0.3421	-0.2553	0.0427	-0.2128	0.0281	-0.2316	-0.2749	-0.1393	0.1323	-0.1167	-0.2209	-0.1587	-0.14	-0.1973	0.1145	0.0828	-0.155	-0.1422	-0.0707	0.069	-0.0895	0.0294	-0.0959	-0.0511	-0.0603	0.0842	-0.0621	0.1182	0.0334	-0.0777	0.3541	0.2047	0.2256	0.3161	-0.207	-0.2532	0.1751
14.7333	-0.0793	0.0436	-0.0953	-0.0294	-0.145	-0.0321	-0.1353	-0.2103	-0.1185	-0.0206	-0.3483	-0.2422	-0.3594	-0.2567	0.043	-0.2116	0.0273	-0.2489	-0.2896	-0.1387	0.1256	-0.122	-0.2096	-0.1523	-0.139	-0.1947	0.1064	0.0684	-0.1448	-0.1515	-0.0741	0.0763	-0.09	0.0198	-0.1011	-0.0461	-0.061	0.0722	-0.069	0.1227	0.0255	-0.0724	0.3477	0.197	0.2164	0.3133	-0.2044	-0.2523	0.1678
14.7667	-0.0771	0.0544	-0.0837	-0.0261	-0.1817	-0.048	-0.1427	-0.2204	-0.1197	-0.0113	-0.3468	-0.2467	-0.3737	-0.2624	0.0354	-0.2152	0.024	-0.2647	-0.2776	-0.136	0.1338	-0.1215	-0.2429	-0.1552	-0.1352	-0.1842	0.0974	0.0678	-0.147	-0.146	-0.0761	0.0803	-0.0867	0.0094	-0.1049	-0.0382	-0.066	0.0704	-0.0727	0.119	0.024	-0.0693	0.3534	0.1851	0.2108	0.3047	-0.1971	-0.25	0.1594
14.8	-0.0766	0.0591	-0.0527	-0.0195	-0.1869	-0.055	-0.1522	-0.2183	-0.1271	-0.0017	-0.3318	-0.2483	-0.3852	-0.2751	0.0215	-0.2251	0.0185	-0.2805	-0.2961	-0.1262	0.1438	-0.1194	-0.2331	-0.1628	-0.1393	-0.1862	0.0862	0.0691	-0.1645	-0.1471	-0.084	0.0758	-0.0798	0.0017	-0.1054	-0.0342	-0.0674	0.0693	-0.0782	0.1129	0.0238	-0.0697	0.3466	0.1704	0.2146	0.2934	-0.204	-0.2482	0.1511
14.8333	-0.0786	0.0658	-0.0964	-0.0116	-0.185	-0.0616	-0.1574	-0.2201	-0.1254	-0.0038	-0.3195	-0.2455	-0.3889	-0.2909	0.0284	-0.2263	0.0116	-0.2889	-0.3095	-0.1314	0.1411	-0.1107	-0.2374	-0.1755	-0.1462	-0.1838	0.073	0.0764	-0.1732	-0.1484	-0.0864	0.0846	-0.0761	-0.0083	-0.098	-0.0366	-0.0678	0.0753	-0.0868	0.0977	0.0137	-0.0659	0.3629	0.1663	0.2115	0.2812	-0.206	-0.2498	0.1416
14.8667	-0.082	0.0674	-0.1143	-0.0189	-0.1982	-0.0651	-0.1641	-0.2144	-0.1233	-0.0063	-0.3207	-0.2461	-0.3944	-0.3006	0.0385	-0.2284	-0.0003	-0.2815	-0.3068	-0.133	0.1454	-0.1096	-0.2481	-0.1799	-0.1759	-0.178	0.0569	0.0854	-0.166	-0.1455	-0.0868	0.0839	-0.0646	-0.0206	-0.0868	-0.0391	-0.0677	0.0754	-0.0927	0.0943	0.0137	-0.0595	0.366	0.1675	0.2021	0.2671	-0.2067	-0.2512	0.1399
14.9	-0.0811	0.0586	-0.111	-0.0189	-0.216	-0.0725	-0.1759	-0.2085	-0.1239	-0.0083	-0.3148	-0.2531	-0.38	-0.305	0.0548	-0.2373	-0.0121	-0.276	-0.3015	-0.1252	0.1597	-0.0898	-0.2478	-0.1862	-0.1818	-0.1643	0.0486	0.0971	-0.1661	-0.1436	-0.088	0.0873	-0.0584	-0.0308	-0.0844	-0.0467	-0.0674	0.0784	-0.0924	0.0747	0.0159	-0.0599	0.3711	0.1686	0.1927	0.2587	-0.2106	-0.2542	0.1358
14.9333	-0.0873	0.0322	-0.1031	-0.011	-0.2407	-0.0752	-0.1787	-0.2042	-0.1242	-0.0096	-0.3161	-0.2603	-0.3767	-0.311	0.0724	-0.2487	-0.0297	-0.2793	-0.2769	-0.1272	0.1802	-0.0702	-0.2547	-0.1802	-0.1745	-0.1531	0.048	0.1074	-0.1771	-0.1488	-0.0881	0.0778	-0.0498	-0.0348	-0.0853	-0.0492	-0.0598	0.0736	-0.0903	0.0581	0.0193	-0.0683	0.3723	0.1678	0.1848	0.2528	-0.2195	-0.2545	0.1384
14.9667	-0.1159	0.011	-0.0838	-0.0096	-0.2444	-0.0681	-0.1799	-0.2002	-0.1311	-0.0165	-0.3216	-0.2665	-0.3809	-0.3099	0.0929	-0.2603	-0.0446	-0.2901	-0.2741	-0.1283	0.1794	-0.0667	-0.2627	-0.1726	-0.1753	-0.148	0.0379	0.113	-0.1753	-0.1443	-0.0803	0.0751	-0.0429	-0.0394	-0.0761	-0.0494	-0.0514	0.0706	-0.0826	0.0516	0.0257	-0.0667	0.3679	0.1696	0.1891	0.2443	-0.2294	-0.2512	0.1294
15	-0.1237	6.885e-05	-0.071	-0.0011	-0.2511	-0.0499	-0.1807	-0.2032	-0.1304	-0.0166	-0.3233	-0.2694	-0.3709	-0.3048	0.1029	-0.2625	-0.0444	-0.295	-0.2691	-0.1287	0.1851	-0.0551	-0.2656	-0.1601	-0.1701	-0.1413	0.0337	0.1137	-0.1775	-0.1468	-0.0643	0.0822	-0.0364	-0.0405	-0.0767	-0.0544	-0.0522	0.0624	-0.0823	0.0558	0.029	-0.0627	0.3621	0.1677	0.1882	0.25	-0.2476	-0.2474	0.1207
15.0333	-0.1315	-0.0039	-0.075	0.0031	-0.2564	-0.0468	-0.183	-0.2016	-0.1309	-0.0146	-0.3311	-0.2933	-0.3773	-0.3023	0.1184	-0.2595	-0.0412	-0.3022	-0.2581	-0.1281	0.1845	-0.0708	-0.2787	-0.1558	-0.1838	-0.1397	0.0327	0.1112	-0.1805	-0.1406	-0.0589	0.0848	-0.0363	-0.0356	-0.07	-0.0571	-0.053	0.0512	-0.0841	0.0499	0.0352	-0.0385	0.3503	0.1631	0.1803	0.2597	-0.2605	-0.242	0.1115
15.0667	-0.1324	-0.0066	-0.0843	0.014	-0.2631	-0.0505	-0.1854	-0.2035	-0.1278	-0.0173	-0.35	-0.3019	-0.3793	-0.2939	0.1288	-0.267	-0.0325	-0.2951	-0.2391	-0.1244	0.1823	-0.0552	-0.2986	-0.1448	-0.208	-0.134	0.0413	0.1058	-0.1806	-0.137	-0.0595	0.0898	-0.0298	-0.0276	-0.0659	-0.0617	-0.0568	0.046	-0.0815	0.0424	0.0497	-0.0628	0.3519	0.1574	0.1795	0.2552	-0.2673	-0.2376	0.0996
15.1	-0.1374	-0.0147	-0.0972	0.028	-0.2709	-0.0495	-0.1887	-0.202	-0.1212	-0.0184	-0.3643	-0.3095	-0.3875	-0.3008	0.1428	-0.2732	-0.0357	-0.2931	-0.2293	-0.12	0.1746	-0.0862	-0.3162	-0.1304	-0.2236	-0.1266	0.0339	0.0989	-0.1668	-0.1245	-0.0582	0.0961	-0.0136	-0.0237	-0.068	-0.0623	-0.0612	0.0425	-0.0768	0.0042	0.0534	-0.0737	0.3578	0.1506	0.1794	0.238	-0.272	-0.235	0.0924
15.1333	-0.143	-0.0137	-0.1096	0.024	-0.2814	-0.0471	-0.2029	-0.1963	-0.1109	-0.0206	-0.3906	-0.2996	-0.3937	-0.3115	0.1578	-0.2719	-0.0379	-0.2907	-0.2254	-0.1238	0.1829	-0.085	-0.3353	-0.1146	-0.2334	-0.1249	0.0236	0.0901	-0.1532	-0.1098	-0.0636	0.1055	0.0014	-0.0045	-0.0753	-0.0621	-0.0672	0.0361	-0.0722	-0.0344	0.0663	-0.0482	0.3696	0.1421	0.1697	0.223	-0.2797	-0.2341	0.0809
15.1667	-0.1419	-0.0068	-0.1133	0.0228	-0.277	-0.0421	-0.2116	-0.1979	-0.1024	-0.0297	-0.3955	-0.2982	-0.3926	-0.3265	0.1652	-0.268	-0.0417	-0.2837	-0.2198	-0.1239	0.1925	-0.0841	-0.343	-0.1024	-0.2373	-0.1242	0.0255	0.0809	-0.1436	-0.099	-0.0659	0.1018	0.0106	0.0004	-0.0699	-0.0614	-0.0724	0.0331	-0.0747	-0.0192	0.0683	-0.0578	0.3766	0.1389	0.1668	0.2152	-0.2827	-0.2308	0.0704
15.2	-0.144	-0.0093	-0.1176	0.0222	-0.2817	-0.0369	-0.2204	-0.1961	-0.0905	-0.0399	-0.3993	-0.3001	-0.3955	-0.3191	0.1666	-0.2605	-0.0472	-0.2745	-0.2304	-0.1243	0.2056	-0.0905	-0.3528	-0.0924	-0.2297	-0.119	0.0195	0.0768	-0.1463	-0.1007	-0.0668	0.1069	0.0179	0.0041	-0.0818	-0.0589	-0.0754	0.0286	-0.0743	-0.0197	0.0697	-0.0509	0.375	0.1369	0.1592	0.2057	-0.288	-0.2279	0.0686
15.2333	-0.1476	-0.012	-0.1232	0.0291	-0.2874	-0.0371	-0.2218	-0.1921	-0.0906	-0.0511	-0.4056	-0.2687	-0.3896	-0.3076	0.1623	-0.2476	-0.0543	-0.2682	-0.2452	-0.1281	0.2078	-0.0878	-0.3656	-0.0864	-0.2452	-0.1162	0.0263	0.0761	-0.156	-0.1045	-0.0735	0.1016	0.0198	-0.0016	-0.0918	-0.0559	-0.081	0.0219	-0.0721	-0.0332	0.0655	-0.05	0.3627	0.1348	0.1534	0.1973	-0.2858	-0.2222	0.0669
15.2667	-0.1458	-0.0204	-0.1173	0.0318	-0.2934	-0.0355	-0.231	-0.1976	-0.082	-0.0603	-0.4254	-0.2667	-0.3674	-0.3069	0.158	-0.2431	-0.0567	-0.2624	-0.2552	-0.1355	0.2213	-0.082	-0.3592	-0.0795	-0.2561	-0.1175	0.0354	0.074	-0.1614	-0.1139	-0.0926	0.1054	0.0264	-0.0019	-0.1033	-0.0526	-0.0806	0.0179	-0.0716	-0.0337	0.0572	-0.0521	0.3564	0.1404	0.15	0.2149	-0.2801	-0.2155	0.0685
15.3	-0.1413	-0.0308	-0.1107	0.0258	-0.295	-0.0309	-0.2312	-0.2031	-0.0918	-0.0711	-0.438	-0.2722	-0.3627	-0.3046	0.1563	-0.2438	-0.0735	-0.2568	-0.2699	-0.138	0.2394	-0.0672	-0.3418	-0.0714	-0.2678	-0.1278	0.047	0.0752	-0.1699	-0.1298	-0.0993	0.1036	0.034	0.0026	-0.1145	-0.0565	-0.0771	0.0186	-0.0666	-0.0478	0.0453	-0.0519	0.3525	0.1417	0.1434	0.2098	-0.2685	-0.2087	0.0649
15.3333	-0.1331	-0.0279	-0.0951	0.0237	-0.2938	-0.0356	-0.2337	-0.2033	-0.0884	-0.0801	-0.4374	-0.2746	-0.361	-0.2976	0.1524	-0.2434	-0.0872	-0.2616	-0.2776	-0.1453	0.2416	-0.0577	-0.3437	-0.0789	-0.2715	-0.1337	0.0574	0.0752	-0.184	-0.1458	-0.1122	0.1014	0.0319	0.0088	-0.1211	-0.0636	-0.0763	0.0185	-0.0625	-0.077	0.0349	-0.0424	0.3506	0.1471	0.1434	0.2071	-0.2594	-0.2056	0.0559
15.3667	-0.1302	-0.0267	-0.0822	0.0111	-0.2943	-0.0372	-0.2427	-0.2029	-0.0984	-0.0879	-0.4281	-0.2762	-0.3663	-0.3076	0.1448	-0.237	-0.0855	-0.26	-0.2883	-0.1583	0.2282	-0.0537	-0.3327	-0.0769	-0.2752	-0.1416	0.0713	0.0667	-0.1843	-0.1675	-0.1149	0.1142	0.0276	0.0155	-0.1291	-0.0708	-0.0785	0.0186	-0.0634	-0.077	0.0337	-0.0365	0.3593	0.15	0.1453	0.1982	-0.2517	-0.1967	0.0494
15.4	-0.1274	-0.0292	-0.0665	0.0158	-0.2953	-0.0381	-0.2593	-0.1975	-0.0936	-0.0993	-0.4234	-0.2727	-0.3783	-0.3187	0.129	-0.2234	-0.0828	-0.2653	-0.2878	-0.1596	0.2236	-0.0468	-0.3258	-0.0644	-0.264	-0.1482	0.0839	0.0603	-0.1552	-0.1748	-0.1115	0.1378	0.0311	0.0185	-0.143	-0.0775	-0.0769	0.0198	-0.0545	-0.0389	0.0332	-0.0292	0.3585	0.1557	0.1432	0.1885	-0.2426	-0.1829	0.0483
15.4333	-0.1247	-0.0347	-0.0534	0.0324	-0.3006	-0.0463	-0.2632	-0.1912	-0.0955	-0.1027	-0.4196	-0.2768	-0.3882	-0.3263	0.1066	-0.2086	-0.0827	-0.2636	-0.2912	-0.1687	0.2048	-0.0485	-0.3132	-0.0565	-0.2768	-0.153	0.0831	0.046	-0.1253	-0.1713	-0.1107	0.1445	0.0361	0.019	-0.1502	-0.0777	-0.0773	0.022	-0.0479	-0.0402	0.0217	-0.0314	0.3512	0.1611	0.1481	0.1798	-0.241	-0.1729	0.0479
15.4667	-0.1247	-0.0415	-0.0444	0.043	-0.3074	-0.0522	-0.2738	-0.1903	-0.0978	-0.1136	-0.4128	-0.2813	-0.3991	-0.3205	0.0824	-0.1933	-0.0776	-0.254	-0.2991	-0.191	0.1887	-0.0471	-0.2976	-0.0518	-0.2787	-0.1579	0.0791	0.0245	-0.0979	-0.1692	-0.1087	0.1455	0.0351	0.026	-0.1539	-0.0729	-0.0789	0.0227	-0.0507	-0.0525	0.0081	-0.0344	0.3546	0.1598	0.1514	0.1712	-0.2344	-0.166	0.0458
15.5	-0.1249	-0.0444	-0.0352	0.0527	-0.303	-0.0633	-0.2748	-0.1861	-0.107	-0.1257	-0.4015	-0.2788	-0.4124	-0.3135	0.0824	-0.1895	-0.0782	-0.2481	-0.3002	-0.2126	0.1825	-0.0374	-0.2886	-0.0463	-0.2743	-0.1602	0.0721	0.0057	-0.0866	-0.1735	-0.1081	0.1469	0.0308	0.034	-0.1632	-0.0747	-0.0803	0.0197	-0.0488	-0.0309	-0.0014	-0.0395	0.3691	0.1597	0.1548	0.1664	-0.2307	-0.1663	0.0436
15.5333	-0.1264	-0.0457	-0.0303	0.0602	-0.2829	-0.0735	-0.2698	-0.1801	-0.1063	-0.1327	-0.3859	-0.2825	-0.416	-0.3052	0.0858	-0.1869	-0.0731	-0.2437	-0.3062	-0.2079	0.1691	-0.0272	-0.2777	-0.0535	-0.27	-0.1643	0.0574	-0.004	-0.077	-0.1629	-0.1061	0.1401	0.0281	0.0436	-0.1668	-0.0711	-0.0838	0.0141	-0.0458	-0.0031	-0.0127	-0.0261	0.3695	0.1642	0.1609	0.1747	-0.2289	-0.1637	0.0492
15.5667	-0.1246	-0.0511	-0.0156	0.0619	-0.2706	-0.0774	-0.2654	-0.178	-0.1071	-0.138	-0.3849	-0.2812	-0.4189	-0.3101	0.0858	-0.1761	-0.0696	-0.247	-0.3024	-0.2044	0.14	-0.0258	-0.2665	-0.0526	-0.2598	-0.1721	0.0479	-0.0071	-0.0651	-0.1403	-0.0986	0.1309	0.0206	0.0567	-0.167	-0.0679	-0.0907	0.0137	-0.0402	0.0089	-0.0177	-0.0178	0.3773	0.1652	0.1618	0.1739	-0.2347	-0.1596	0.0531
15.6	-0.1239	-0.0391	0.0141	0.0545	-0.2559	-0.0741	-0.2477	-0.1809	-0.1054	-0.1367	-0.3887	-0.2709	-0.427	-0.3064	0.0877	-0.1696	-0.0715	-0.2517	-0.3171	-0.2037	0.1111	-0.0318	-0.2652	-0.0409	-0.2514	-0.1729	0.036	-0.003	-0.0588	-0.1246	-0.0921	0.1296	0.0158	0.065	-0.1631	-0.0622	-0.0968	0.0162	-0.0437	0.0185	-0.0235	-0.0153	0.382	0.1638	0.1684	0.1712	-0.2366	-0.1575	0.0575
15.6333	-0.1239	-0.0298	0.0196	0.0359	-0.2488	-0.067	-0.2251	-0.1788	-0.114	-0.1361	-0.3961	-0.2651	-0.4295	-0.2974	0.0912	-0.165	-0.0655	-0.2602	-0.322	-0.2074	0.0905	-0.032	-0.2602	-0.0361	-0.243	-0.1742	0.0308	-0.006	-0.0489	-0.1132	-0.089	0.1175	0.0081	0.0706	-0.1601	-0.0608	-0.1012	0.0152	-0.0498	0.0357	-0.0308	-0.0052	0.3799	0.1606	0.1747	0.1749	-0.2369	-0.157	0.0655
15.6667	-0.1217	-0.0289	0.0242	0.0205	-0.2526	-0.064	-0.2033	-0.1809	-0.098	-0.1374	-0.4015	-0.266	-0.4319	-0.2955	0.0932	-0.1596	-0.0664	-0.2659	-0.3213	-0.2222	0.0703	-0.0415	-0.2522	-0.0272	-0.2339	-0.1701	0.0194	0.0051	-0.0319	-0.1144	-0.092	0.0933	0.0028	0.0708	-0.1577	-0.0672	-0.1074	0.0149	-0.0568	0.05	-0.0422	-0.0114	0.3738	0.1561	0.1758	0.1777	-0.2367	-0.1542	0.0658
15.7	-0.126	-0.0215	0.021	0.0069	-0.2663	-0.0662	-0.1866	-0.1948	-0.0953	-0.1358	-0.4018	-0.254	-0.4368	-0.2857	0.0948	-0.1572	-0.0739	-0.2734	-0.3203	-0.244	0.064	-0.0452	-0.2559	-0.019	-0.2171	-0.1725	0.0136	0.0098	-0.0202	-0.1176	-0.0904	0.0785	-0.0066	0.0704	-0.1541	-0.0684	-0.1032	0.0155	-0.0726	0.0588	-0.0519	-0.0257	0.3743	0.1564	0.1759	0.1757	-0.234	-0.1568	0.0527
15.7333	-0.1331	-0.0168	0.0225	-0.001	-0.2836	-0.0762	-0.1895	-0.2022	-0.1196	-0.1375	-0.3938	-0.2524	-0.4408	-0.2881	0.0985	-0.1637	-0.0868	-0.2759	-0.3102	-0.2635	0.067	-0.0455	-0.255	-0.0199	-0.2088	-0.1678	0.0005	0.0145	-0.0013	-0.1164	-0.087	0.069	-0.0184	0.0764	-0.1479	-0.0653	-0.1054	0.0098	-0.0798	0.0699	-0.0738	-0.0403	0.372	0.1556	0.1803	0.1697	-0.2334	-0.1628	0.0469
15.7667	-0.1398	-0.0201	0.0304	-0.0078	-0.3002	-0.0816	-0.1936	-0.2004	-0.1129	-0.1421	-0.3953	-0.2554	-0.4476	-0.2919	0.1029	-0.1648	-0.1079	-0.2759	-0.3085	-0.2648	0.0547	-0.0456	-0.2565	-0.0213	-0.2035	-0.1545	-0.0153	0.0167	0.0132	-0.1092	-0.0877	0.0653	-0.0332	0.0836	-0.1423	-0.059	-0.1061	0.0074	-0.0813	0.0781	-0.0894	-0.0572	0.3695	0.1591	0.1768	0.1718	-0.2368	-0.1699	0.0504
15.8	-0.1227	-0.0096	0.0475	-0.0083	-0.3141	-0.1012	-0.2019	-0.1994	-0.1072	-0.1372	-0.398	-0.2564	-0.4561	-0.2902	0.1188	-0.1695	-0.1235	-0.2751	-0.3099	-0.2632	0.0412	-0.045	-0.2535	-0.0174	-0.1944	-0.1566	-0.0243	0.0167	0.0229	-0.1195	-0.0824	0.0631	-0.0479	0.0859	-0.1486	-0.0521	-0.1078	0.0084	-0.0823	0.0884	-0.0943	-0.071	0.3732	0.1664	0.1771	0.1816	-0.2412	-0.1839	0.0498
15.8333	-0.1287	0.0156	0.0298	0.0002	-0.3159	-0.0999	-0.203	-0.1924	-0.1069	-0.1441	-0.401	-0.2608	-0.4643	-0.2881	0.1304	-0.1727	-0.1316	-0.2688	-0.3142	-0.2561	0.0351	-0.0437	-0.2521	-0.0148	-0.1862	-0.1591	-0.0405	0.0079	0.0186	-0.1308	-0.0797	0.0579	-0.0592	0.0856	-0.1562	-0.0484	-0.1099	0.0098	-0.0743	0.0919	-0.1046	-0.0716	0.3758	0.1701	0.175	0.1868	-0.2512	-0.1949	0.054
15.8667	-0.1347	0.0217	0.0314	0.0015	-0.3183	-0.0997	-0.2102	-0.19	-0.1064	-0.1617	-0.4026	-0.2658	-0.4638	-0.289	0.1402	-0.1786	-0.1402	-0.2713	-0.3152	-0.2515	0.0244	-0.0399	-0.2431	-0.0098	-0.1772	-0.1612	-0.0473	0.0024	0.0219	-0.131	-0.0833	0.0559	-0.0543	0.0808	-0.1604	-0.0544	-0.104	0.0107	-0.0807	0.0949	-0.1154	-0.066	0.3741	0.1716	0.1722	0.1915	-0.2599	-0.1986	0.0569
15.9	-0.1465	0.0297	0.0308	0.0278	-0.3253	-0.0938	-0.2028	-0.1962	-0.1042	-0.1631	-0.408	-0.2718	-0.4639	-0.2844	0.1438	-0.1772	-0.1501	-0.273	-0.3157	-0.239	0.0151	-0.0358	-0.2384	0.0039	-0.1732	-0.1595	-0.0523	-0.0054	0.0203	-0.1472	-0.085	0.0588	-0.0655	0.0755	-0.1668	-0.0563	-0.1025	0.0122	-0.0672	0.1032	-0.1231	-0.0575	0.3648	0.1743	0.1661	0.1887	-0.2645	-0.1971	0.0483
15.9333	-0.1569	0.0327	0.0702	0.0232	-0.3237	-0.0891	-0.206	-0.1976	-0.0986	-0.1698	-0.4076	-0.276	-0.462	-0.2769	0.1448	-0.1781	-0.1543	-0.2749	-0.3208	-0.2235	0.0069	-0.0378	-0.2331	0.0135	-0.1766	-0.16	-0.0409	-0.0124	0.0076	-0.1562	-0.0878	0.0583	-0.0818	0.0751	-0.1665	-0.0617	-0.0986	0.0056	-0.067	0.0986	-0.1293	-0.0544	0.3535	0.1719	0.1623	0.193	-0.2703	-0.1969	0.0505
15.9667	-0.1624	0.0307	0.0827	0.0066	-0.3225	-0.0824	-0.2082	-0.1963	-0.1008	-0.1763	-0.4108	-0.2872	-0.4599	-0.2603	0.1433	-0.1812	-0.1681	-0.2776	-0.3209	-0.2289	0.0086	-0.04	-0.2141	0.0137	-0.1773	-0.1612	-0.0406	-0.018	-0.0004	-0.1632	-0.092	0.0592	-0.0621	0.0624	-0.1698	-0.0586	-0.0984	0.0007	-0.0576	0.0951	-0.1313	-0.0536	0.3497	0.1783	0.1588	0.1986	-0.2739	-0.1994	0.0556
16	-0.1723	0.0133	0.0749	0.0184	-0.324	-0.0808	-0.2067	-0.1887	-0.1052	-0.1778	-0.4099	-0.3044	-0.4466	-0.2622	0.1472	-0.1796	-0.1807	-0.2752	-0.3188	-0.2227	0.0198	-0.0447	-0.2132	0.0181	-0.1735	-0.1538	-0.0497	-0.0214	-0.0114	-0.1748	-0.1045	0.0599	-0.0473	0.0606	-0.1731	-0.0562	-0.0977	-0.0048	-0.0413	0.0904	-0.1302	-0.0556	0.3378	0.1808	0.152	0.2097	-0.2748	-0.2011	0.0595
16.0333	-0.1828	0.0011	0.0611	0.0181	-0.3305	-0.0852	-0.2084	-0.1854	-0.1066	-0.178	-0.4109	-0.3155	-0.4357	-0.2696	0.1279	-0.1751	-0.1857	-0.2681	-0.3213	-0.2069	0.0192	-0.0549	-0.2228	0.0239	-0.1693	-0.1534	-0.0617	-0.0221	-0.0266	-0.1831	-0.1129	0.0547	-0.0471	0.0644	-0.1761	-0.0505	-0.0954	-0.0063	-0.0432	0.09	-0.1201	-0.0621	0.3302	0.1772	0.148	0.2098	-0.2781	-0.1994	0.0554
16.0667	-0.1924	-0.0079	0.0559	0.0113	-0.3294	-0.0872	-0.2048	-0.1797	-0.1147	-0.1747	-0.4191	-0.3212	-0.4283	-0.2835	0.1019	-0.1689	-0.187	-0.254	-0.3294	-0.1997	0.0214	-0.0669	-0.2266	0.0239	-0.1702	-0.1684	-0.0782	-0.0364	-0.0262	-0.1874	-0.124	0.0506	-0.053	0.0729	-0.1832	-0.0539	-0.0945	-0.0083	-0.0432	0.09	-0.1241	-0.0646	0.3144	0.1741	0.1463	0.2131	-0.2804	-0.2007	0.0475
16.1	-0.1989	-0.0246	0.0586	0.0166	-0.3342	-0.0841	-0.2021	-0.1788	-0.109	-0.1724	-0.4173	-0.3262	-0.4259	-0.2848	0.0962	-0.1622	-0.185	-0.2466	-0.3337	-0.1893	0.0101	-0.0796	-0.2351	0.0185	-0.1741	-0.1856	-0.083	-0.0518	-0.0294	-0.1936	-0.1307	0.0493	-0.0587	0.0699	-0.179	-0.0557	-0.0952	-0.0111	-0.0432	0.0691	-0.1612	-0.0631	0.3063	0.1742	0.1435	0.2211	-0.283	-0.2028	0.0301
16.1333	-0.2082	-0.0177	0.0694	0.0298	-0.3375	-0.0838	-0.1977	-0.1802	-0.1098	-0.1668	-0.4087	-0.3201	-0.4297	-0.2801	0.0904	-0.1507	-0.1781	-0.2363	-0.3352	-0.1482	0.0053	-0.0991	-0.2376	0.0092	-0.166	-0.1867	-0.0853	-0.0596	-0.0324	-0.2067	-0.1396	0.0548	-0.0567	0.0615	-0.1789	-0.0587	-0.0926	-0.0154	-0.0501	0.0684	-0.1497	-0.0636	0.3039	0.1822	0.1477	0.2323	-0.2816	-0.2058	0.0171
16.1667	-0.2196	-0.0081	0.0853	0.0344	-0.351	-0.0904	-0.195	-0.1851	-0.1115	-0.161	-0.4085	-0.3142	-0.4465	-0.2796	0.0838	-0.153	-0.182	-0.2356	-0.3356	-0.1407	-0.0041	-0.1183	-0.234	-0.0082	-0.1619	-0.1938	-0.0773	-0.0648	-0.0365	-0.223	-0.1448	0.0481	-0.059	0.0695	-0.1752	-0.0581	-0.09	-0.0159	-0.048	0.0731	-0.1449	-0.0665	0.29	0.1867	0.1456	0.2446	-0.2788	-0.2131	0.0167
16.2	-0.2244	0.0003	0.0987	0.0431	-0.368	-0.0852	-0.1917	-0.1905	-0.112	-0.1555	-0.4225	-0.3093	-0.4523	-0.275	0.0735	-0.1545	-0.1874	-0.2313	-0.3328	-0.1645	-0.0079	-0.1389	-0.2206	-0.0226	-0.1475	-0.1913	-0.0782	-0.0742	-0.0425	-0.2155	-0.1427	0.0465	-0.0614	0.0829	-0.1795	-0.0682	-0.0938	-0.0194	-0.0457	0.072	-0.1448	-0.0705	0.2767	0.1866	0.1462	0.2547	-0.2782	-0.2162	0.0195
16.2333	-0.2346	0.0193	0.1023	0.0392	-0.3703	-0.0791	-0.1944	-0.1899	-0.1187	-0.1532	-0.4467	-0.2979	-0.4554	-0.2613	0.0633	-0.1613	-0.1897	-0.2198	-0.3302	-0.1617	-0.0007	-0.1517	-0.2061	-0.0364	-0.1541	-0.1832	-0.0818	-0.0748	-0.0523	-0.2178	-0.135	0.043	-0.0609	0.0859	-0.1743	-0.0739	-0.0992	-0.0227	-0.0416	0.0694	-0.141	-0.0786	0.2644	0.1891	0.1513	0.265	-0.2799	-0.218	0.0276
16.2667	-0.2261	0.0324	0.1024	0.0291	-0.375	-0.0773	-0.1912	-0.1884	-0.1218	-0.1641	-0.465	-0.288	-0.4558	-0.2486	0.0531	-0.1685	-0.1852	-0.2025	-0.3266	-0.1663	-0.0117	-0.1549	-0.2003	-0.0425	-0.1592	-0.1838	-0.0816	-0.0701	-0.0387	-0.2093	-0.1432	0.0401	-0.0641	0.0981	-0.1807	-0.0737	-0.1016	-0.0232	-0.0547	0.0577	-0.1414	-0.0752	0.2559	0.1927	0.1627	0.2733	-0.2838	-0.2144	0.0184
16.3	-0.2264	0.0344	0.0947	0.0097	-0.3803	-0.0558	-0.1916	-0.1913	-0.1229	-0.1652	-0.4735	-0.2806	-0.4496	-0.2417	0.0415	-0.1738	-0.1715	-0.1989	-0.3328	-0.1697	-0.0155	-0.1557	-0.1944	-0.0546	-0.157	-0.1767	-0.0779	-0.0689	-0.0419	-0.193	-0.1434	0.0348	-0.0701	0.1022	-0.1809	-0.0661	-0.1021	-0.0317	-0.0611	0.0459	-0.1482	-0.0812	0.2556	0.2006	0.1729	0.2771	-0.2867	-0.2136	0.0332
16.3333	-0.2309	0.0413	0.0784	-0.0036	-0.3748	-0.0551	-0.1901	-0.2043	-0.1264	-0.1727	-0.4724	-0.2754	-0.4246	-0.2389	0.0433	-0.1747	-0.1606	-0.2011	-0.3282	-0.1731	-0.0169	-0.1584	-0.1859	-0.0571	-0.1637	-0.174	-0.0723	-0.0591	-0.0344	-0.1464	-0.1406	0.0324	-0.0792	0.1117	-0.1855	-0.0599	-0.1042	-0.0389	-0.0617	0.0406	-0.1374	-0.089	0.2601	0.2031	0.1818	0.2851	-0.295	-0.2155	0.0386
16.3667	-0.2308	0.0448	0.0691	-0.0035	-0.369	-0.0578	-0.1891	-0.206	-0.1287	-0.1764	-0.4692	-0.2744	-0.4142	-0.2365	0.0524	-0.1804	-0.1515	-0.2007	-0.3315	-0.1848	-0.041	-0.1702	-0.1842	-0.0679	-0.1676	-0.1727	-0.0698	-0.0565	-0.0343	-0.1778	-0.1288	0.0296	-0.0732	0.1208	-0.1875	-0.0572	-0.1098	-0.0458	-0.061	0.0351	-0.142	-0.0994	0.2504	0.2101	0.1791	0.2919	-0.2999	-0.2183	0.0119
16.4	-0.229	0.0609	0.0511	-0.0093	-0.3718	-0.064	-0.1832	-0.1988	-0.1284	-0.1674	-0.4469	-0.2683	-0.422	-0.2361	0.0589	-0.1835	-0.1464	-0.1998	-0.3249	-0.1698	-0.0503	-0.1814	-0.196	-0.0751	-0.1677	-0.1655	-0.0669	-0.0667	-0.0495	-0.1877	-0.1187	0.0294	-0.0753	0.117	-0.188	-0.0523	-0.1068	-0.0507	-0.0563	0.0261	-0.1451	-0.1096	0.2454	0.2108	0.1833	0.2964	-0.3009	-0.2236	0.0181
16.4333	-0.2312	0.0617	0.028	-0.0121	-0.3693	-0.0648	-0.1743	-0.19	-0.1294	-0.1579	-0.4281	-0.2567	-0.4289	-0.2389	0.0735	-0.1943	-0.142	-0.1966	-0.3268	-0.155	-0.0416	-0.1931	-0.2165	-0.0836	-0.19	-0.1626	-0.069	-0.0679	-0.0365	-0.1944	-0.1156	0.0378	-0.0803	0.0979	-0.1819	-0.0451	-0.1091	-0.0521	-0.0535	0.0199	-0.1502	-0.118	0.2417	0.2036	0.1788	0.2962	-0.3047	-0.2361	0.0122
16.4667	-0.2343	0.0612	0.0209	-0.0141	-0.3634	-0.0641	-0.1718	-0.1877	-0.1293	-0.159	-0.4212	-0.2425	-0.44	-0.2405	0.0799	-0.2019	-0.1414	-0.19	-0.3376	-0.1385	-0.0748	-0.206	-0.2264	-0.081	-0.2019	-0.16	-0.0846	-0.0686	-0.0263	-0.1917	-0.1103	0.0341	-0.0907	0.1028	-0.1768	-0.0348	-0.1132	-0.0614	-0.0487	0.008	-0.1574	-0.1205	0.2431	0.1944	0.1774	0.2943	-0.3071	-0.2472	0.0244
16.5	-0.2358	0.0653	0.0198	-0.0108	-0.3484	-0.057	-0.1713	-0.1881	-0.1272	-0.1566	-0.4062	-0.2359	-0.4543	-0.2446	0.0838	-0.1993	-0.1488	-0.1906	-0.3376	-0.1238	-0.0921	-0.2177	-0.2423	-0.0937	-0.2009	-0.1588	-0.0872	-0.0691	-0.0225	-0.1907	-0.1191	0.0348	-0.0855	0.1137	-0.1724	-0.0281	-0.1192	-0.0649	-0.0485	-0.0093	-0.167	-0.1219	0.234	0.1876	0.1701	0.2919	-0.3123	-0.2385	0.03
16.5333	-0.2229	0.0724	0.0273	-0.0267	-0.3329	-0.0546	-0.1762	-0.1945	-0.1267	-0.159	-0.3813	-0.2296	-0.4653	-0.2477	0.0784	-0.2012	-0.1534	-0.1947	-0.3364	-0.1235	-0.1061	-0.233	-0.2696	-0.1084	-0.2137	-0.1581	-0.0856	-0.0658	-0.0212	-0.1813	-0.133	0.0369	-0.0815	0.1134	-0.1759	-0.0307	-0.1228	-0.0691	-0.0468	-0.0259	-0.1654	-0.126	0.2307	0.1854	0.164	0.2891	-0.3136	-0.2578	0.0341
16.5667	-0.2255	0.0793	0.0363	-0.0449	-0.3155	-0.0477	-0.1783	-0.197	-0.1245	-0.1593	-0.3596	-0.2225	-0.4705	-0.2454	0.0759	-0.1954	-0.1597	-0.1943	-0.3237	-0.1291	-0.1105	-0.2372	-0.2811	-0.1163	-0.2138	-0.1654	-0.1172	-0.0778	0.0067	-0.1816	-0.1425	0.0452	-0.0757	0.1101	-0.1689	-0.0374	-0.1272	-0.076	-0.0397	-0.0407	-0.1654	-0.1259	0.2228	0.1804	0.1567	0.2845	-0.3172	-0.2721	0.0206
16.6	-0.2119	0.0849	0.0321	-0.0614	-0.3028	-0.0507	-0.183	-0.2051	-0.125	-0.1649	-0.3448	-0.2142	-0.4764	-0.2395	0.0763	-0.1904	-0.1583	-0.1934	-0.3061	-0.1172	-0.1214	-0.2334	-0.2877	-0.1164	-0.2116	-0.1726	-0.1373	-0.0698	0.0069	-0.1851	-0.1468	0.0504	-0.061	0.112	-0.165	-0.0393	-0.1305	-0.0735	-0.0267	-0.0484	-0.1667	-0.1301	0.2227	0.1794	0.1586	0.2747	-0.3207	-0.3129	0.0122
16.6333	-0.2091	0.0963	0.0219	-0.0596	-0.2776	-0.0536	-0.1921	-0.2144	-0.1227	-0.1664	-0.3387	-0.204	-0.4775	-0.2381	0.0764	-0.1819	-0.1573	-0.1941	-0.2903	-0.1157	-0.1396	-0.2327	-0.2964	-0.1146	-0.1962	-0.1788	-0.1594	-0.0585	-0.0002	-0.1969	-0.1533	0.0339	-0.0414	0.1176	-0.161	-0.0538	-0.1349	-0.0696	-0.0118	-0.0616	-0.1735	-0.1308	0.2179	0.1828	0.1388	0.2637	-0.3202	-0.3227	0.0011
16.6667	-0.2113	0.1081	0.0058	-0.0537	-0.2533	-0.0551	-0.1985	-0.226	-0.1214	-0.1654	-0.3342	-0.197	-0.4761	-0.2323	0.0768	-0.1681	-0.1587	-0.1975	-0.2697	-0.107	-0.1528	-0.2419	-0.3092	-0.115	-0.2041	-0.1843	-0.1564	-0.05	0.0004	-0.2049	-0.1508	0.0327	-0.0466	0.1155	-0.1516	-0.0569	-0.133	-0.0718	-0.0008	-0.0551	-0.1785	-0.1308	0.218	0.189	0.1214	0.2606	-0.3224	-0.3336	-0.004
16.7	-0.2042	0.1169	-0.0014	-0.065	-0.2384	-0.052	-0.2065	-0.2439	-0.1191	-0.1616	-0.3444	-0.1959	-0.4691	-0.2223	0.0707	-0.1589	-0.1555	-0.1997	-0.2468	-0.096	-0.1694	-0.2501	-0.3219	-0.1213	-0.2026	-0.1872	-0.161	-0.0356	-0.014	-0.211	-0.1502	0.0203	-0.0393	0.0954	-0.1442	-0.0598	-0.1363	-0.0767	0.0074	-0.0605	-0.1914	-0.1268	0.2087	0.1878	0.1193	0.2553	-0.3231	-0.3385	-0.0032
16.7333	-0.1842	0.1142	-0.0092	-0.0701	-0.236	-0.0497	-0.2094	-0.2543	-0.1166	-0.1587	-0.3453	-0.2017	-0.4665	-0.214	0.079	-0.1557	-0.1432	-0.2033	-0.2272	-0.0955	-0.1787	-0.2609	-0.328	-0.1189	-0.2006	-0.1873	-0.1712	-0.0342	-0.0202	-0.2173	-0.1505	0.0199	-0.0371	0.0883	-0.1374	-0.0535	-0.1358	-0.0813	-0.001	-0.081	-0.2008	-0.1319	0.2043	0.1834	0.1179	0.2457	-0.3277	-0.322	-0.0027
16.7667	-0.1907	0.1092	-0.0224	-0.0671	-0.2446	-0.0412	-0.2164	-0.2658	-0.1128	-0.153	-0.3488	-0.2095	-0.4671	-0.2112	0.0975	-0.1502	-0.142	-0.2076	-0.2198	-0.099	-0.1842	-0.257	-0.3342	-0.1276	-0.2049	-0.1914	-0.1798	-0.0366	-0.0259	-0.2221	-0.1454	0.0235	-0.0422	0.087	-0.1288	-0.0459	-0.1321	-0.0873	-0.0081	-0.0599	-0.2154	-0.1221	0.2048	0.1844	0.1177	0.235	-0.3372	-0.3228	-0.0071
16.8	-0.1871	0.097	-0.0268	-0.0735	-0.255	-0.035	-0.2214	-0.2744	-0.1116	-0.1486	-0.3525	-0.215	-0.4732	-0.2115	0.1135	-0.146	-0.1313	-0.2119	-0.2213	-0.1001	-0.1911	-0.2485	-0.3337	-0.1375	-0.2048	-0.1967	-0.1787	-0.038	-0.022	-0.2218	-0.1462	0.0368	-0.0449	0.0922	-0.122	-0.0387	-0.1265	-0.093	-0.0174	-0.0694	-0.2236	-0.1304	0.2005	0.1876	0.1152	0.227	-0.3413	-0.3155	-0.0131
16.8333	-0.1856	0.0919	-0.0401	-0.0825	-0.2584	-0.0305	-0.2237	-0.2772	-0.108	-0.1442	-0.3531	-0.2225	-0.4748	-0.2096	0.1218	-0.1508	-0.1288	-0.2133	-0.2175	-0.0967	-0.1902	-0.2479	-0.3327	-0.1413	-0.2084	-0.2013	-0.1885	-0.0378	-0.021	-0.2148	-0.1481	0.0583	-0.0393	0.0865	-0.1214	-0.0383	-0.1239	-0.0942	-0.0243	-0.0924	-0.2264	-0.1453	0.205	0.1831	0.1125	0.2142	-0.3425	-0.3121	-0.0135
16.8667	-0.1822	0.0872	-0.0497	-0.1143	-0.2611	-0.0271	-0.2236	-0.2637	-0.1016	-0.1355	-0.3491	-0.2246	-0.47	-0.2091	0.1249	-0.1524	-0.1328	-0.2145	-0.2079	-0.0943	-0.1868	-0.2447	-0.3308	-0.1461	-0.2085	-0.1947	-0.2012	-0.0338	-0.0201	-0.2119	-0.1456	0.0684	-0.0379	0.0808	-0.1168	-0.0485	-0.1203	-0.0896	-0.0367	-0.091	-0.2337	-0.1549	0.204	0.1817	0.1061	0.2142	-0.3403	-0.3101	-0.0179
16.9	-0.1785	0.0885	-0.0483	-0.112	-0.2721	-0.0169	-0.2214	-0.2587	-0.0966	-0.1288	-0.3424	-0.2278	-0.4742	-0.2096	0.1297	-0.1525	-0.1386	-0.2172	-0.2021	-0.084	-0.1782	-0.2323	-0.3221	-0.1508	-0.204	-0.1921	-0.2261	-0.0381	-0.0167	-0.2037	-0.1421	0.0678	-0.023	0.0821	-0.1166	-0.0545	-0.1211	-0.0879	-0.0416	-0.1096	-0.2403	-0.1604	0.1972	0.1798	0.0948	0.2174	-0.3411	-0.2964	-0.0092
16.9333	-0.1791	0.0819	-0.0375	-0.1173	-0.277	-0.0042	-0.2224	-0.254	-0.097	-0.1289	-0.3152	-0.2292	-0.4684	-0.2074	0.128	-0.151	-0.1469	-0.2262	-0.2068	-0.0763	-0.1666	-0.218	-0.3118	-0.149	-0.2009	-0.1971	-0.2222	-0.034	-0.0198	-0.1988	-0.1432	0.0594	-0.0191	0.0722	-0.115	-0.062	-0.1236	-0.0809	-0.0373	-0.113	-0.2408	-0.1678	0.1841	0.1707	0.0897	0.2191	-0.3378	-0.2899	7.515e-05
16.9667	-0.1822	0.0802	-0.0412	-0.1247	-0.2754	-0.0089	-0.2109	-0.2523	-0.1006	-0.128	-0.289	-0.231	-0.4641	-0.2177	0.1141	-0.1576	-0.1576	-0.2326	-0.2101	-0.0725	-0.1475	-0.1967	-0.3062	-0.1451	-0.1927	-0.2029	-0.2242	-0.0367	-0.0114	-0.1865	-0.1386	0.0642	0.0223	0.0711	-0.1242	-0.0569	-0.1241	-0.0757	-0.0417	-0.1128	-0.2408	-0.1784	0.1689	0.1768	0.0841	0.2277	-0.3369	-0.2746	0.0084
17	-0.1819	0.0752	-0.0451	-0.1263	-0.2754	-0.0095	-0.1994	-0.2533	-0.1032	-0.1289	-0.2684	-0.223	-0.4571	-0.2221	0.0992	-0.1562	-0.1623	-0.2407	-0.2085	-0.0799	-0.1349	-0.1864	-0.3026	-0.135	-0.1816	-0.2109	-0.2226	-0.0333	-0.0209	-0.1694	-0.1302	0.052	0.0522	0.0646	-0.1266	-0.0519	-0.1287	-0.0792	-0.0533	-0.1278	-0.2317	-0.1859	0.149	0.1692	0.0818	0.2159	-0.3319	-0.2753	0.0085
17.0333	-0.1847	0.0716	-0.0535	-0.1446	-0.2763	-0.0091	-0.1892	-0.2603	-0.1121	-0.1278	-0.2528	-0.2215	-0.4561	-0.2221	0.0767	-0.1526	-0.174	-0.2395	-0.218	-0.0738	-0.1295	-0.1803	-0.3088	-0.1249	-0.1739	-0.2155	-0.2184	-0.0336	-0.0279	-0.1482	-0.1345	0.0436	0.0723	0.0482	-0.1295	-0.0484	-0.1323	-0.0833	-0.0606	-0.1261	-0.2188	-0.1764	0.1357	0.1662	0.0735	0.1968	-0.328	-0.2667	0.0108
17.0667	-0.1883	0.0608	-0.0505	-0.1542	-0.2738	0.0041	-0.1786	-0.2747	-0.1185	-0.1243	-0.2364	-0.2186	-0.4527	-0.2295	0.0597	-0.1532	-0.1925	-0.242	-0.2286	-0.0495	-0.1333	-0.1745	-0.3068	-0.1159	-0.1692	-0.219	-0.2093	-0.034	-0.0282	-0.1373	-0.1346	0.0312	0.0849	0.0377	-0.1379	-0.0493	-0.1319	-0.083	-0.067	-0.1275	-0.2019	-0.1721	0.141	0.17	0.0713	0.1815	-0.3222	-0.2589	0.0061
17.1	-0.1897	0.0504	-0.0702	-0.1621	-0.2761	0.0132	-0.1714	-0.2973	-0.12	-0.1225	-0.2227	-0.2164	-0.4475	-0.2385	0.0469	-0.1589	-0.1984	-0.2399	-0.2299	-0.0182	-0.1327	-0.1709	-0.3094	-0.0955	-0.1639	-0.2251	-0.2049	-0.0299	-0.0389	-0.1205	-0.1371	0.0185	0.0897	0.0313	-0.1478	-0.0535	-0.1344	-0.0877	-0.0684	-0.1307	-0.1932	-0.177	0.1359	0.1509	0.0694	0.1717	-0.3203	-0.2455	-0.0026
17.1333	-0.1951	0.0373	-0.0723	-0.1593	-0.2735	0.01	-0.1694	-0.2966	-0.1185	-0.1183	-0.2176	-0.2149	-0.4467	-0.2447	0.0399	-0.1621	-0.2011	-0.2365	-0.2347	-0.0111	-0.1291	-0.1732	-0.3132	-0.0681	-0.1616	-0.2177	-0.2076	-0.0365	-0.0465	-0.1114	-0.1428	0.0139	0.1094	0.0326	-0.1587	-0.0606	-0.1411	-0.0923	-0.0662	-0.1288	-0.1787	-0.1887	0.1334	0.1527	0.066	0.1607	-0.3263	-0.2393	-0.0213
17.1667	-0.1925	0.0238	-0.0726	-0.1688	-0.2695	-0.0002	-0.172	-0.293	-0.121	-0.1208	-0.2279	-0.2168	-0.447	-0.243	0.0362	-0.1673	-0.1923	-0.2297	-0.2399	-0.0167	-0.1231	-0.1724	-0.3189	-0.0568	-0.1652	-0.2204	-0.2119	-0.036	-0.0655	-0.1087	-0.1396	0.0177	0.125	0.0236	-0.1575	-0.062	-0.1453	-0.0972	-0.0737	-0.1176	-0.1684	-0.2019	0.1297	0.1613	0.0579	0.1591	-0.3276	-0.2279	-0.0229
17.2	-0.1937	0.0162	-0.0704	-0.1862	-0.2629	0.0075	-0.1747	-0.3025	-0.1209	-0.1243	-0.2399	-0.221	-0.4506	-0.2338	0.0369	-0.1728	-0.1962	-0.2237	-0.2436	-0.0243	-0.1195	-0.174	-0.3249	-0.0484	-0.1551	-0.2124	-0.2115	-0.0404	-0.0633	-0.1075	-0.1349	0.0062	0.1316	0.0349	-0.1631	-0.0625	-0.1471	-0.0926	-0.077	-0.1066	-0.1652	-0.2055	0.1317	0.1479	0.0601	0.164	-0.3289	-0.2213	-0.0097
17.2333	-0.1865	0.0105	-0.0258	-0.1929	-0.2647	0.0118	-0.181	-0.3156	-0.121	-0.1289	-0.2525	-0.2349	-0.4557	-0.238	0.0388	-0.1754	-0.2076	-0.2217	-0.2405	-0.0378	-0.1127	-0.1711	-0.3165	-0.0239	-0.1506	-0.1957	-0.2147	-0.0401	-0.0675	-0.1002	-0.1321	-0.0045	0.132	0.0319	-0.1676	-0.064	-0.1524	-0.0909	-0.0638	-0.1086	-0.1552	-0.2058	0.132	0.1535	0.0571	0.1648	-0.3328	-0.2061	-0.005
17.2667	-0.1877	0.0029	0.0093	-0.2009	-0.2711	0.0218	-0.1726	-0.324	-0.1229	-0.1381	-0.268	-0.235	-0.4662	-0.2298	0.0464	-0.1765	-0.2079	-0.2165	-0.2401	-0.0432	-0.1089	-0.1755	-0.3063	-0.0055	-0.1421	-0.174	-0.2272	-0.0495	-0.0643	-0.1024	-0.1345	-0.0069	0.1293	0.0184	-0.1669	-0.0536	-0.1513	-0.0823	-0.0658	-0.1033	-0.1413	-0.2036	0.1314	0.1525	0.0541	0.1599	-0.3313	-0.2001	0.0068
17.3	-0.189	-0.0171	0.0081	-0.1951	-0.2791	0.0473	-0.1605	-0.3252	-0.1252	-0.1427	-0.2947	-0.2319	-0.469	-0.231	0.0509	-0.1796	-0.205	-0.2108	-0.2351	-0.0532	-0.1126	-0.1791	-0.3037	0.0083	-0.1371	-0.1588	-0.2343	-0.0582	-0.0678	-0.1092	-0.139	-0.0036	0.1165	0.0089	-0.167	-0.0364	-0.1469	-0.0759	-0.0654	-0.0991	-0.1322	-0.1982	0.1249	0.1535	0.0473	0.1646	-0.3285	-0.2021	0.0106
17.3333	-0.1908	-0.025	-0.0227	-0.1949	-0.2831	0.0533	-0.1572	-0.3175	-0.1206	-0.1449	-0.3187	-0.2299	-0.4706	-0.2319	0.0548	-0.1845	-0.1972	-0.2131	-0.2385	-0.0641	-0.1152	-0.2098	-0.307	0.0142	-0.1296	-0.1618	-0.2218	-0.0571	-0.0823	-0.1082	-0.1339	-0.0019	0.1066	0.0024	-0.1668	-0.028	-0.1576	-0.0704	-0.0576	-0.094	-0.1241	-0.1908	0.1251	0.1444	0.0346	0.1658	-0.3309	-0.2102	0.0165
17.3667	-0.1942	-0.0317	0.0339	-0.2051	-0.2883	0.0535	-0.1512	-0.3113	-0.1165	-0.149	-0.3286	-0.2281	-0.4681	-0.2306	0.0575	-0.1874	-0.19	-0.2067	-0.2388	-0.0695	-0.1196	-0.2203	-0.3014	0.0169	-0.1293	-0.1375	-0.2077	-0.0421	-0.0886	-0.103	-0.1348	0.0002	0.0961	-0.0055	-0.1706	-0.0223	-0.1586	-0.0705	-0.0515	-0.092	-0.1149	-0.1879	0.1243	0.155	0.0323	0.1714	-0.3279	-0.2147	0.0044
17.4	-0.1998	-0.0384	0.0323	-0.2007	-0.28	0.0494	-0.1299	-0.3161	-0.1156	-0.1466	-0.3391	-0.2305	-0.471	-0.2271	0.0637	-0.1895	-0.1871	-0.1989	-0.244	-0.0703	-0.1243	-0.2185	-0.2964	0.011	-0.1298	-0.1617	-0.2023	-0.0296	-0.0936	-0.1111	-0.135	0.0022	0.0802	-0.0084	-0.1719	-0.025	-0.1682	-0.0779	-0.0531	-0.091	-0.1093	-0.192	0.1461	0.1723	0.0345	0.1779	-0.3243	-0.2165	-0.0095
17.4333	-0.2085	-0.0399	0.0344	-0.2007	-0.2737	0.0487	-0.1233	-0.3167	-0.1174	-0.137	-0.355	-0.2224	-0.4758	-0.2234	0.0703	-0.2032	-0.1759	-0.2011	-0.2544	-0.065	-0.1481	-0.2174	-0.2966	0.0178	-0.142	-0.1576	-0.1884	-0.024	-0.095	-0.129	-0.132	0.0056	0.0612	-0.0075	-0.168	-0.0291	-0.1667	-0.0711	-0.0503	-0.0849	-0.1095	-0.1898	0.1534	0.1746	0.0281	0.1828	-0.3183	-0.2174	-0.0048
17.4667	-0.2165	-0.0453	0.0289	-0.1875	-0.2724	0.0358	-0.1185	-0.3197	-0.1187	-0.1294	-0.3534	-0.214	-0.4789	-0.2222	0.0729	-0.2069	-0.1678	-0.1979	-0.256	-0.0665	-0.1602	-0.2213	-0.2855	0.0328	-0.1515	-0.1498	-0.1873	-0.0202	-0.0966	-0.1188	-0.1252	0.0011	0.0447	-0.0047	-0.1693	-0.0383	-0.1686	-0.0679	-0.0481	-0.0814	-0.1106	-0.1838	0.1465	0.1862	0.0256	0.1794	-0.3135	-0.2212	-0.0029
17.5	-0.2227	-0.0503	0.0124	-0.1775	-0.2793	0.0242	-0.1153	-0.3175	-0.1252	-0.1221	-0.3524	-0.2047	-0.4938	-0.2357	0.0755	-0.2077	-0.1648	-0.1928	-0.2496	-0.061	-0.1668	-0.223	-0.2915	0.0427	-0.1528	-0.14	-0.1841	-0.0246	-0.0925	-0.1333	-0.1177	-0.0056	0.0275	-0.0042	-0.1684	-0.0428	-0.1765	-0.0638	-0.047	-0.0959	-0.1053	-0.1775	0.1478	0.1855	0.0286	0.1723	-0.3081	-0.2244	-0.0063
17.5333	-0.2321	-0.052	-0.0283	-0.1698	-0.2899	0.0199	-0.119	-0.3153	-0.1293	-0.1153	-0.3688	-0.204	-0.505	-0.2471	0.0697	-0.2078	-0.1636	-0.1898	-0.2418	-0.0598	-0.1691	-0.2216	-0.2776	0.0596	-0.1466	-0.1362	-0.1771	-0.0242	-0.085	-0.128	-0.1125	-0.015	0.0224	-0.0226	-0.1664	-0.0474	-0.1857	-0.066	-0.0476	-0.1007	-0.1063	-0.1738	0.1481	0.1794	0.0329	0.1672	-0.3043	-0.2129	-0.0017
17.5667	-0.2357	-0.0552	-0.0553	-0.1694	-0.3019	0.0134	-0.1264	-0.3058	-0.1321	-0.1025	-0.3735	-0.2045	-0.5065	-0.2542	0.0726	-0.2058	-0.164	-0.1929	-0.2427	-0.0675	-0.1728	-0.2199	-0.2657	0.0522	-0.1403	-0.1365	-0.1733	-0.0352	-0.086	-0.134	-0.1076	-0.0223	0.0247	-0.0049	-0.1683	-0.0516	-0.1814	-0.0643	-0.0505	-0.0976	-0.1011	-0.1614	0.1462	0.1881	0.0317	0.1688	-0.3013	-0.2185	0.0015
17.6	-0.232	-0.0351	-0.0731	-0.186	-0.3172	0.0084	-0.1261	-0.3013	-0.1375	-0.0927	-0.3863	-0.2016	-0.5005	-0.2594	0.0743	-0.2078	-0.1615	-0.1895	-0.243	-0.0599	-0.1654	-0.2146	-0.243	0.0401	-0.1387	-0.1331	-0.1841	-0.0478	-0.0669	-0.1352	-0.0991	-0.0309	0.0137	-0.0053	-0.1625	-0.0533	-0.1801	-0.0623	-0.0586	-0.0998	-0.0981	-0.1612	0.1559	0.1923	0.0296	0.168	-0.2988	-0.2222	0.0104
17.6333	-0.2268	-0.0234	-0.0786	-0.1959	-0.3435	-0.0056	-0.1215	-0.3119	-0.1403	-0.0848	-0.3921	-0.197	-0.4968	-0.2678	0.0784	-0.2051	-0.1531	-0.183	-0.2496	-0.0763	-0.1628	-0.1998	-0.2281	0.0447	-0.137	-0.1243	-0.1922	-0.0541	-0.0593	-0.1422	-0.0877	-0.0479	0.0007	-0.0087	-0.1476	-0.057	-0.1758	-0.0595	-0.0664	-0.1019	-0.0995	-0.1626	0.1382	0.1913	0.0269	0.1666	-0.2948	-0.2269	0.037
17.6667	-0.2265	-0.0101	-0.0799	-0.1985	-0.3588	-0.0119	-0.1189	-0.3204	-0.1483	-0.0752	-0.3954	-0.1958	-0.5006	-0.2731	0.0781	-0.1974	-0.1469	-0.1852	-0.2481	-0.0854	-0.1548	-0.1921	-0.223	0.0443	-0.1331	-0.1203	-0.2131	-0.0566	-0.0578	-0.1606	-0.078	-0.0613	-0.0084	-0.0376	-0.1433	-0.0559	-0.1724	-0.0502	-0.0664	-0.1111	-0.0963	-0.1575	0.1346	0.1971	0.0199	0.1658	-0.2918	-0.2356	0.0482
17.7	-0.2244	0.0022	-0.0742	-0.1916	-0.3618	-0.0223	-0.1191	-0.3254	-0.1487	-0.0693	-0.4044	-0.1995	-0.4935	-0.2813	0.0809	-0.1941	-0.1353	-0.186	-0.2561	-0.0958	-0.1528	-0.1817	-0.2116	0.0466	-0.1316	-0.1152	-0.2271	-0.0455	-0.0289	-0.1449	-0.0749	-0.0695	-0.0166	-0.0628	-0.1513	-0.0546	-0.1717	-0.0511	-0.0639	-0.1222	-0.0922	-0.1583	0.1212	0.205	0.0222	0.1591	-0.285	-0.2479	0.0653
17.7333	-0.2275	0.0115	-0.0633	-0.1934	-0.3661	-0.0329	-0.1202	-0.3168	-0.1499	-0.0701	-0.4099	-0.2089	-0.4889	-0.2807	0.0841	-0.1918	-0.132	-0.1926	-0.2719	-0.1017	-0.1486	-0.1611	-0.2154	0.0392	-0.1316	-0.1175	-0.2287	-0.0439	-0.0263	-0.1335	-0.0739	-0.0783	-0.0484	-0.0592	-0.163	-0.053	-0.1706	-0.0514	-0.0644	-0.1215	-0.0841	-0.154	0.101	0.2261	0.0224	0.1458	-0.2784	-0.2488	0.074
17.7667	-0.2272	0.0211	-0.0701	-0.195	-0.3677	-0.0406	-0.1205	-0.3172	-0.1531	-0.0712	-0.422	-0.2119	-0.4758	-0.2833	0.0867	-0.1883	-0.1302	-0.1954	-0.2871	-0.1051	-0.1461	-0.1553	-0.2262	0.0246	-0.1269	-0.1196	-0.2348	-0.0512	-0.0282	-0.1233	-0.0704	-0.0816	-0.0422	-0.0544	-0.1696	-0.0588	-0.1709	-0.0467	-0.0712	-0.1289	-0.0835	-0.1438	0.0685	0.2334	0.0203	0.1376	-0.2706	-0.2482	0.0827
17.8	-0.2251	0.021	-0.0746	-0.192	-0.3673	-0.0448	-0.1241	-0.3128	-0.1557	-0.0685	-0.4132	-0.2224	-0.4734	-0.2852	0.0967	-0.1937	-0.1301	-0.1944	-0.2937	-0.1085	-0.1567	-0.1605	-0.2283	0.0188	-0.127	-0.1164	-0.2283	-0.0594	-0.0375	-0.1031	-0.0646	-0.0852	-0.0476	-0.0592	-0.1805	-0.0529	-0.1667	-0.0422	-0.0771	-0.1375	-0.0806	-0.1347	0.0574	0.2272	0.0198	0.1283	-0.2709	-0.2496	0.0828
17.8333	-0.2252	0.0012	-0.0809	-0.1981	-0.3591	-0.0465	-0.121	-0.3054	-0.1558	-0.0684	-0.3971	-0.2436	-0.4663	-0.2797	0.0866	-0.2033	-0.1131	-0.2082	-0.2843	-0.1129	-0.1654	-0.1674	-0.2243	-0.0021	-0.1173	-0.1086	-0.2352	-0.0622	-0.0664	-0.0858	-0.0647	-0.0851	-0.0324	-0.0651	-0.1939	-0.0461	-0.1614	-0.0394	-0.0761	-0.1434	-0.0774	-0.1289	0.0447	0.2168	0.0183	0.1238	-0.2659	-0.2551	0.0836
17.8667	-0.2238	-0.0117	-0.0845	-0.2018	-0.3438	-0.046	-0.1121	-0.302	-0.159	-0.0693	-0.3698	-0.2531	-0.4703	-0.2796	0.0827	-0.2138	-0.0969	-0.1988	-0.2703	-0.1165	-0.1541	-0.1873	-0.2193	0.0007	-0.1224	-0.1109	-0.236	-0.0583	-0.0773	-0.0686	-0.0584	-0.0817	-0.0502	-0.067	-0.2016	-0.0337	-0.1576	-0.0428	-0.0645	-0.1481	-0.073	-0.1203	0.031	0.212	0.0128	0.1149	-0.2639	-0.2505	0.0792
17.9	-0.223	-0.0279	-0.0864	-0.1958	-0.3288	-0.0441	-0.0934	-0.2888	-0.1582	-0.0635	-0.3562	-0.2676	-0.4775	-0.2727	0.0774	-0.2239	-0.0939	-0.2044	-0.2621	-0.1249	-0.1491	-0.2009	-0.2164	-0.0228	-0.1168	-0.1301	-0.2349	-0.0502	-0.1008	-0.0511	-0.0465	-0.0831	-0.0446	-0.0919	-0.2099	-0.0237	-0.1575	-0.0417	-0.0718	-0.1389	-0.0669	-0.1101	0.0194	0.2031	-8.661e-05	0.1069	-0.2564	-0.2632	0.0801
17.9333	-0.2199	-0.0343	-0.0802	-0.1938	-0.313	-0.0516	-0.0926	-0.2785	-0.1622	-0.0595	-0.3473	-0.2695	-0.4851	-0.2772	0.0678	-0.2319	-0.0854	-0.2052	-0.2627	-0.1254	-0.154	-0.2142	-0.2186	-0.0273	-0.1119	-0.138	-0.2404	-0.0407	-0.1017	-0.0348	-0.046	-0.0871	-0.0403	-0.091	-0.212	-0.0077	-0.1546	-0.0436	-0.063	-0.1186	-0.0647	-0.0995	0.0135	0.2001	-0.0139	0.1003	-0.2576	-0.2669	0.0873
17.9667	-0.2124	-0.0309	-0.0691	-0.2071	-0.2989	-0.0603	-0.0943	-0.2708	-0.1578	-0.0589	-0.3458	-0.2636	-0.4907	-0.2879	0.0656	-0.2463	-0.0819	-0.2049	-0.2496	-0.1238	-0.1541	-0.2324	-0.212	-0.0451	-0.1038	-0.1436	-0.247	-0.0343	-0.1091	-0.0383	-0.0463	-0.0862	-0.0411	-0.0821	-0.2135	0.0063	-0.1487	-0.0463	-0.0677	-0.1085	-0.0644	-0.093	0.0176	0.1826	-0.0138	0.0984	-0.2531	-0.2745	0.0968
18	-0.2113	-0.0243	-0.0695	-0.225	-0.2864	-0.0659	-0.0964	-0.2583	-0.1514	-0.0587	-0.3596	-0.2507	-0.4769	-0.2955	0.0728	-0.2682	-0.0865	-0.2062	-0.2415	-0.1374	-0.1562	-0.2364	-0.1981	-0.0542	-0.101	-0.1601	-0.2483	-0.0337	-0.1182	-0.0497	-0.0501	-0.0729	-0.0348	-0.077	-0.2164	0.0132	-0.1508	-0.0496	-0.0757	-0.1091	-0.0662	-0.0911	0.0185	0.1837	-0.0172	0.0985	-0.2514	-0.2824	0.1062
18.0333	-0.2125	-0.0254	-0.0695	-0.2324	-0.2785	-0.0648	-0.1028	-0.2429	-0.146	-0.0653	-0.3604	-0.2382	-0.4843	-0.2951	0.0899	-0.2839	-0.0897	-0.2058	-0.2385	-0.149	-0.1624	-0.2373	-0.1837	-0.0692	-0.1093	-0.16	-0.2494	-0.0337	-0.1285	-0.0528	-0.046	-0.0695	-0.0236	-0.0844	-0.2173	0.0253	-0.1566	-0.0526	-0.0761	-0.1021	-0.0694	-0.0937	0.012	0.1719	-0.0159	0.0991	-0.2505	-0.2888	0.1056
18.0667	-0.2258	-0.0248	-0.0785	-0.2476	-0.2755	-0.0598	-0.1082	-0.2373	-0.1366	-0.0686	-0.37	-0.2359	-0.4898	-0.2922	0.1108	-0.2817	-0.091	-0.2056	-0.2368	-0.1533	-0.1597	-0.2303	-0.17	-0.0678	-0.1081	-0.1681	-0.2378	-0.0389	-0.1446	-0.0441	-0.0475	-0.0666	-0.0244	-0.0919	-0.22	0.0304	-0.1575	-0.0595	-0.075	-0.0954	-0.0691	-0.0878	0.0053	0.1687	-0.0108	0.0972	-0.25	-0.2914	0.1043
18.1	-0.2156	-0.0255	-0.0869	-0.2462	-0.2804	-0.0555	-0.11	-0.2272	-0.1341	-0.0725	-0.3747	-0.2329	-0.4975	-0.2926	0.1219	-0.2747	-0.0986	-0.2054	-0.2176	-0.1584	-0.1587	-0.2244	-0.1548	-0.0781	-0.1144	-0.1826	-0.227	-0.046	-0.1481	-0.0431	-0.0478	-0.0636	-0.0218	-0.088	-0.2196	0.0385	-0.1628	-0.0618	-0.0779	-0.0815	-0.0733	-0.0872	0.0034	0.166	0.005	0.0909	-0.2453	-0.2926	0.0964
18.1333	-0.214	-0.0233	-0.0911	-0.2494	-0.2935	-0.0568	-0.1085	-0.2175	-0.1262	-0.0817	-0.3758	-0.2284	-0.5002	-0.2928	0.1348	-0.2725	-0.1077	-0.2092	-0.2366	-0.1673	-0.1581	-0.2154	-0.1407	-0.0664	-0.1108	-0.1962	-0.2188	-0.0477	-0.1547	-0.0589	-0.0479	-0.0639	-0.039	-0.0797	-0.2146	0.0325	-0.1665	-0.0662	-0.0743	-0.0665	-0.0758	-0.093	-0.0053	0.1637	0.013	0.0856	-0.2478	-0.2944	0.0875
18.1667	-0.21	-0.0194	-0.0923	-0.2435	-0.3005	-0.0614	-0.1054	-0.2169	-0.1233	-0.0756	-0.3862	-0.2291	-0.495	-0.293	0.1464	-0.2684	-0.1131	-0.2037	-0.2505	-0.1718	-0.1534	-0.2111	-0.1305	-0.0812	-0.1037	-0.203	-0.2092	-0.0506	-0.15	-0.0753	-0.0444	-0.0724	-0.0571	-0.0857	-0.2146	0.0328	-0.1703	-0.0654	-0.0824	-0.0592	-0.0841	-0.1102	-0.0221	0.1649	0.0167	0.0784	-0.2514	-0.2915	0.078
18.2	-0.1984	-0.0197	-0.1129	-0.2388	-0.3025	-0.0751	-0.1045	-0.2156	-0.1246	-0.0769	-0.3963	-0.2264	-0.491	-0.2958	0.1609	-0.2653	-0.129	-0.2033	-0.2571	-0.1841	-0.1427	-0.2042	-0.1315	-0.0795	-0.1062	-0.2095	-0.1995	-0.0531	-0.1399	-0.0934	-0.0512	-0.0756	-0.0672	-0.0869	-0.2133	0.0487	-0.1714	-0.0625	-0.0902	-0.0596	-0.0742	-0.133	-0.0267	0.1617	0.0346	0.0728	-0.2532	-0.2906	0.0776
18.2333	-0.192	-0.0167	-0.1215	-0.2327	-0.3164	-0.081	-0.1114	-0.2175	-0.1207	-0.0803	-0.4045	-0.2222	-0.4956	-0.2919	0.1694	-0.2548	-0.1364	-0.2079	-0.2767	-0.1969	-0.1319	-0.2016	-0.1464	-0.0809	-0.1139	-0.2203	-0.1934	-0.0639	-0.1449	-0.122	-0.0594	-0.0676	-0.0674	-0.0879	-0.2184	0.045	-0.1735	-0.0605	-0.0612	-0.0611	-0.0717	-0.1446	-0.028	0.1651	0.0355	0.0663	-0.2601	-0.288	0.0684
18.2667	-0.1908	-0.0097	-0.096	-0.2244	-0.3225	-0.0792	-0.1067	-0.225	-0.1193	-0.0891	-0.4118	-0.2269	-0.5025	-0.2938	0.1723	-0.2505	-0.1345	-0.2077	-0.2865	-0.2138	-0.1215	-0.1992	-0.1449	-0.0788	-0.1304	-0.2304	-0.1875	-0.0681	-0.1554	-0.1303	-0.0632	-0.0638	-0.0669	-0.0791	-0.2193	0.0504	-0.1731	-0.0563	-0.0603	-0.0689	-0.0722	-0.1466	-0.0371	0.16	0.0329	0.073	-0.2643	-0.2865	0.0617
18.3	-0.191	-0.0089	-0.0868	-0.2108	-0.3269	-0.0644	-0.1048	-0.2314	-0.1099	-0.0967	-0.4113	-0.2147	-0.5043	-0.291	0.181	-0.2466	-0.1341	-0.2065	-0.2892	-0.2213	-0.1126	-0.1933	-0.1448	-0.0871	-0.1572	-0.2339	-0.1816	-0.069	-0.1546	-0.1216	-0.062	-0.0655	-0.0642	-0.0875	-0.2175	0.0507	-0.1763	-0.0571	-0.0646	-0.0827	-0.0746	-0.1483	-0.0508	0.1554	0.0327	0.0802	-0.2657	-0.2915	0.0642
18.3333	-0.1893	-0.0034	-0.074	-0.2122	-0.3286	-0.063	-0.1022	-0.2431	-0.1053	-0.1016	-0.4029	-0.2088	-0.5137	-0.296	0.1871	-0.244	-0.1489	-0.202	-0.2939	-0.2193	-0.1022	-0.1858	-0.1431	-0.0898	-0.1679	-0.2348	-0.185	-0.0662	-0.1828	-0.117	-0.0583	-0.0704	-0.0608	-0.0953	-0.2061	0.0558	-0.1745	-0.0597	-0.0622	-0.0929	-0.0826	-0.143	-0.0562	0.1527	0.0327	0.0905	-0.2644	-0.2939	0.0707
18.3667	-0.188	0.0009	-0.0658	-0.2155	-0.3367	-0.0703	-0.0985	-0.2478	-0.0979	-0.1042	-0.382	-0.2062	-0.5131	-0.2993	0.1889	-0.2389	-0.1694	-0.1982	-0.2953	-0.2121	-0.0992	-0.1779	-0.1575	-0.101	-0.1725	-0.2361	-0.188	-0.0616	-0.1821	-0.1235	-0.0602	-0.0772	-0.0642	-0.1099	-0.205	0.0519	-0.1833	-0.0624	-0.0675	-0.087	-0.0915	-0.1337	-0.084	0.1502	0.0344	0.0943	-0.264	-0.2954	0.0729
18.4	-0.1887	0.001	-0.0659	-0.2207	-0.3432	-0.0692	-0.0892	-0.2526	-0.0941	-0.104	-0.372	-0.2077	-0.519	-0.3005	0.1908	-0.2285	-0.1884	-0.191	-0.3026	-0.1972	-0.0907	-0.1709	-0.1387	-0.1076	-0.1748	-0.2387	-0.1876	-0.0699	-0.1782	-0.1271	-0.0483	-0.0788	-0.0684	-0.1184	-0.2054	0.0449	-0.1877	-0.066	-0.0706	-0.0783	-0.0974	-0.1268	-0.0725	0.1507	0.0367	0.1059	-0.2626	-0.3005	0.0642
18.4333	-0.1881	0.0004	-0.0689	-0.2079	-0.349	-0.0708	-0.0835	-0.2613	-0.0887	-0.1039	-0.3591	-0.2005	-0.5218	-0.3078	0.1817	-0.2224	-0.1992	-0.1825	-0.3122	-0.1892	-0.0901	-0.163	-0.1305	-0.1203	-0.1704	-0.2399	-0.1818	-0.0737	-0.1771	-0.129	-0.0399	-0.0762	-0.0676	-0.1312	-0.2012	0.0458	-0.1911	-0.0746	-0.0703	-0.0673	-0.1023	-0.1135	-0.0641	0.1448	0.0459	0.1214	-0.2611	-0.3051	0.0505
18.4667	-0.1898	-0.0029	-0.0719	-0.2031	-0.3495	-0.0702	-0.0894	-0.2608	-0.0823	-0.1043	-0.3462	-0.1973	-0.5182	-0.3044	0.1702	-0.2116	-0.1979	-0.1812	-0.3135	-0.1804	-0.0902	-0.1655	-0.123	-0.1233	-0.1606	-0.2279	-0.1929	-0.0692	-0.1769	-0.1136	-0.0356	-0.0686	-0.0667	-0.1455	-0.1888	0.0426	-0.1901	-0.0823	-0.0768	-0.0571	-0.1072	-0.0987	-0.0492	0.1403	0.0545	0.1344	-0.255	-0.3111	0.0459
18.5	-0.1864	-0.0023	-0.0723	-0.1996	-0.3528	-0.0715	-0.101	-0.2626	-0.0792	-0.1123	-0.3331	-0.2019	-0.5179	-0.3002	0.1613	-0.219	-0.2016	-0.1765	-0.3168	-0.1826	-0.0937	-0.1664	-0.1212	-0.1209	-0.147	-0.2202	-0.1888	-0.0681	-0.1631	-0.1133	-0.0326	-0.0497	-0.0741	-0.1576	-0.185	0.039	-0.191	-0.0939	-0.0838	-0.0532	-0.1224	-0.0838	-0.043	0.1343	0.0607	0.1438	-0.2511	-0.3177	0.0431
18.5333	-0.1824	0.0015	-0.0658	-0.2051	-0.3576	-0.076	-0.1064	-0.2713	-0.0793	-0.1142	-0.318	-0.2018	-0.5233	-0.2951	0.1558	-0.2389	-0.1993	-0.1764	-0.3181	-0.1905	-0.101	-0.1673	-0.1227	-0.1129	-0.144	-0.2156	-0.1888	-0.0678	-0.1458	-0.106	-0.0248	-0.0373	-0.0754	-0.1565	-0.177	0.0379	-0.1879	-0.0944	-0.0966	-0.0605	-0.1346	-0.0705	-0.0366	0.1245	0.0628	0.1468	-0.2461	-0.3304	0.0312
18.5667	-0.1815	0.0062	-0.0665	-0.1926	-0.3609	-0.0684	-0.104	-0.2731	-0.0839	-0.1173	-0.3007	-0.1913	-0.5228	-0.2861	0.1482	-0.2486	-0.1929	-0.1705	-0.3187	-0.198	-0.1128	-0.1679	-0.1368	-0.1011	-0.1409	-0.2059	-0.1892	-0.0698	-0.1261	-0.1049	-0.016	-0.0278	-0.0697	-0.1595	-0.1741	0.029	-0.1902	-0.0967	-0.1172	-0.0668	-0.1349	-0.0696	-0.039	0.1169	0.0738	0.1473	-0.2415	-0.3344	0.0302
18.6	-0.1794	0.0073	-0.0877	-0.1978	-0.3565	-0.0705	-0.1089	-0.2734	-0.0946	-0.1233	-0.2966	-0.1852	-0.5249	-0.2735	0.1483	-0.256	-0.1877	-0.1568	-0.3238	-0.2008	-0.1195	-0.1611	-0.1368	-0.1078	-0.1313	-0.2027	-0.1775	-0.0701	-0.124	-0.1178	-0.0218	-0.0219	-0.0601	-0.1675	-0.1586	0.0201	-0.1902	-0.0988	-0.1214	-0.0789	-0.1365	-0.0642	-0.0313	0.1066	0.0704	0.1469	-0.2355	-0.3426	0.019
18.6333	-0.1704	0.0027	-0.1081	-0.1945	-0.3607	-0.07	-0.1148	-0.2685	-0.0982	-0.1281	-0.2922	-0.1815	-0.5222	-0.2601	0.1446	-0.2631	-0.1855	-0.1549	-0.3247	-0.1975	-0.1269	-0.1523	-0.1376	-0.1208	-0.1255	-0.2072	-0.1593	-0.0789	-0.1252	-0.1263	-0.0321	-0.0209	-0.06	-0.1768	-0.1567	0.012	-0.1904	-0.0955	-0.1232	-0.0896	-0.1378	-0.0637	-0.033	0.1002	0.0742	0.1513	-0.2256	-0.3522	0.0071
18.6667	-0.1674	0.0072	-0.108	-0.1863	-0.3589	-0.0674	-0.1145	-0.269	-0.097	-0.1336	-0.2856	-0.1803	-0.5143	-0.2472	0.141	-0.2663	-0.1887	-0.1554	-0.3158	-0.1925	-0.1282	-0.1543	-0.145	-0.1223	-0.1212	-0.2018	-0.1494	-0.0922	-0.1265	-0.1412	-0.043	-0.0241	-0.0533	-0.1903	-0.1548	0.0093	-0.1923	-0.0921	-0.1327	-0.1005	-0.1371	-0.0668	-0.053	0.1007	0.0762	0.148	-0.2196	-0.3569	0.0129
18.7	-0.1651	0.017	-0.1039	-0.1978	-0.3603	-0.0688	-0.1123	-0.2684	-0.0908	-0.1427	-0.2716	-0.1782	-0.5075	-0.238	0.1312	-0.2709	-0.1917	-0.1619	-0.3144	-0.1969	-0.1218	-0.1544	-0.1559	-0.1368	-0.1238	-0.1718	-0.128	-0.1092	-0.1277	-0.1347	-0.0468	-0.024	-0.0485	-0.2067	-0.1535	0.0179	-0.197	-0.0918	-0.1355	-0.1118	-0.1214	-0.083	-0.0372	0.1013	0.0783	0.1409	-0.2189	-0.3617	0.0171
18.7333	-0.1662	0.0256	-0.084	-0.2088	-0.3632	-0.0689	-0.111	-0.2635	-0.0912	-0.1417	-0.2642	-0.1786	-0.5023	-0.2324	0.1268	-0.2649	-0.1933	-0.1649	-0.3098	-0.183	-0.122	-0.1594	-0.1651	-0.1491	-0.1245	-0.1802	-0.1327	-0.1209	-0.133	-0.1212	-0.0523	-0.0206	-0.0473	-0.2165	-0.1566	0.0261	-0.1986	-0.088	-0.125	-0.114	-0.1266	-0.0791	-0.0176	0.1034	0.0773	0.1421	-0.2183	-0.37	0.0202
18.7667	-0.1708	0.0311	-0.0865	-0.2045	-0.3717	-0.074	-0.1201	-0.2726	-0.0874	-0.1381	-0.2537	-0.1853	-0.4999	-0.2302	0.1236	-0.2637	-0.1954	-0.1681	-0.3008	-0.1622	-0.1165	-0.1629	-0.1774	-0.1371	-0.1185	-0.1771	-0.139	-0.1225	-0.1414	-0.1213	-0.0586	-0.018	-0.0387	-0.2184	-0.1556	0.0257	-0.2006	-0.0878	-0.1158	-0.1187	-0.1322	-0.0731	-0.0113	0.1069	0.0715	0.1401	-0.2183	-0.3759	0.0195
18.8	-0.1751	0.0424	-0.1054	-0.1882	-0.3798	-0.0763	-0.1302	-0.2856	-0.0798	-0.1395	-0.2499	-0.183	-0.4958	-0.232	0.1191	-0.2613	-0.1973	-0.1723	-0.2878	-0.1616	-0.1143	-0.1618	-0.1877	-0.127	-0.1167	-0.1766	-0.1502	-0.1223	-0.1462	-0.1425	-0.0615	-0.0128	-0.0409	-0.2142	-0.1484	0.0236	-0.2057	-0.089	-0.1058	-0.1233	-0.1438	-0.0562	-0.0048	0.1009	0.0575	0.1406	-0.2249	-0.3829	0.017
18.8333	-0.1781	0.0513	-0.1265	-0.1807	-0.3835	-0.0729	-0.1315	-0.3102	-0.075	-0.144	-0.2586	-0.1775	-0.4882	-0.229	0.126	-0.2625	-0.1957	-0.1681	-0.2819	-0.1526	-0.1143	-0.1653	-0.1965	-0.1346	-0.1127	-0.1967	-0.1529	-0.1146	-0.1405	-0.1628	-0.0647	-0.0093	-0.0394	-0.2164	-0.1523	0.0278	-0.2105	-0.0868	-0.1019	-0.119	-0.141	-0.0388	0.0079	0.0976	0.0556	0.1354	-0.2289	-0.3834	0.0189
18.8667	-0.1808	0.0674	-0.1295	-0.1673	-0.3946	-0.0754	-0.1327	-0.3144	-0.0717	-0.1515	-0.2719	-0.1738	-0.4867	-0.228	0.1337	-0.2569	-0.1855	-0.1728	-0.272	-0.1529	-0.119	-0.1728	-0.2083	-0.1512	-0.112	-0.2231	-0.1321	-0.1077	-0.1293	-0.1858	-0.0659	-0.0066	-0.0445	-0.2155	-0.1496	0.0274	-0.2144	-0.0902	-0.1082	-0.1179	-0.1372	-0.0192	0.0252	0.072	0.0528	0.1277	-0.2349	-0.374	0.0216
18.9	-0.1809	0.08	-0.1283	-0.1536	-0.4017	-0.0763	-0.1265	-0.3306	-0.067	-0.1639	-0.2813	-0.1635	-0.4816	-0.2238	0.1413	-0.2454	-0.1754	-0.1791	-0.2642	-0.1503	-0.1165	-0.1784	-0.2171	-0.1716	-0.1232	-0.2135	-0.1052	-0.0932	-0.1277	-0.2101	-0.0583	-0.0105	-0.0404	-0.2173	-0.1508	0.0311	-0.2163	-0.0845	-0.1024	-0.1096	-0.1267	0.0037	0.0496	0.0643	0.0463	0.1217	-0.2424	-0.3726	0.0281
18.9333	-0.1749	0.089	-0.1268	-0.1533	-0.4076	-0.083	-0.1158	-0.3305	-0.0635	-0.1724	-0.2852	-0.1545	-0.4872	-0.2099	0.1435	-0.2367	-0.1757	-0.1917	-0.2571	-0.1592	-0.1082	-0.1886	-0.2195	-0.1872	-0.1362	-0.2367	-0.0986	-0.0822	-0.1108	-0.2281	-0.0542	-0.0242	-0.0338	-0.2139	-0.1484	0.032	-0.2161	-0.071	-0.0985	-0.1017	-0.128	0.0112	0.0571	0.0635	0.0388	0.1077	-0.2429	-0.3641	0.0304
18.9667	-0.1647	0.0915	-0.108	-0.1506	-0.4219	-0.0866	-0.104	-0.3285	-0.0622	-0.1817	-0.2867	-0.1406	-0.4865	-0.2052	0.143	-0.2322	-0.1785	-0.1919	-0.2475	-0.1719	-0.1151	-0.1936	-0.2246	-0.1871	-0.1416	-0.2349	-0.0883	-0.0668	-0.1038	-0.2382	-0.0542	-0.0341	-0.0242	-0.2041	-0.1448	0.0332	-0.2148	-0.067	-0.0909	-0.0877	-0.127	0.0162	0.0654	0.0647	0.0332	0.0826	-0.2432	-0.3496	0.0289
19	-0.1586	0.0992	-0.0807	-0.1502	-0.4404	-0.102	-0.1	-0.3259	-0.0617	-0.1882	-0.2857	-0.1325	-0.4854	-0.1932	0.1367	-0.2294	-0.1817	-0.1934	-0.2411	-0.1819	-0.1242	-0.2003	-0.2286	-0.1945	-0.1387	-0.2376	-0.0844	-0.0528	-0.1072	-0.2413	-0.0547	-0.0424	-0.019	-0.2014	-0.1398	0.0347	-0.2138	-0.0496	-0.0919	-0.0793	-0.1271	0.0133	0.0674	0.0699	0.0327	0.0668	-0.2448	-0.3399	0.0342
19.0333	-0.154	0.0972	-0.0777	-0.1679	-0.4417	-0.1004	-0.0978	-0.331	-0.0617	-0.1957	-0.2879	-0.1294	-0.4898	-0.1804	0.1325	-0.2268	-0.1799	-0.1999	-0.2444	-0.1853	-0.1104	-0.2039	-0.2309	-0.188	-0.1399	-0.2364	-0.0896	-0.0398	-0.1101	-0.236	-0.0636	-0.0257	-0.0092	-0.1955	-0.1377	0.0319	-0.2156	-0.0372	-0.0984	-0.0701	-0.1269	0.0196	0.0647	0.0788	0.0278	0.0536	-0.2437	-0.3355	0.0362
19.0667	-0.1475	0.0968	-0.0741	-0.1785	-0.4497	-0.0989	-0.0981	-0.3182	-0.0604	-0.209	-0.2825	-0.126	-0.4911	-0.1787	0.1288	-0.2245	-0.1672	-0.2076	-0.2512	-0.1892	-0.105	-0.2144	-0.2355	-0.1815	-0.1462	-0.2368	-0.0949	-0.0306	-0.1128	-0.2326	-0.0545	-0.0163	-2.797e-05	-0.1982	-0.135	0.0246	-0.2174	-0.0263	-0.0993	-0.0699	-0.1237	0.0202	0.0621	0.0578	0.0378	0.044	-0.2406	-0.3367	0.0383
19.1	-0.1384	0.085	-0.0723	-0.1802	-0.4559	-0.0957	-0.093	-0.3221	-0.0582	-0.2151	-0.2814	-0.1143	-0.4955	-0.1758	0.1183	-0.2167	-0.157	-0.2139	-0.2528	-0.1874	-0.0874	-0.2151	-0.2358	-0.1663	-0.157	-0.249	-0.088	-0.0224	-0.1085	-0.2132	-0.0545	-0.0101	0.0041	-0.1789	-0.1294	0.0201	-0.2168	-0.0289	-0.0947	-0.0672	-0.1284	0.0205	0.0609	0.0603	0.0362	0.0355	-0.2425	-0.3404	0.0436
19.1333	-0.1322	0.0806	-0.0592	-0.1902	-0.4587	-0.0846	-0.0879	-0.3196	-0.0598	-0.2178	-0.2776	-0.0976	-0.5009	-0.1683	0.1052	-0.2118	-0.1452	-0.2174	-0.2566	-0.1774	-0.0781	-0.2229	-0.2343	-0.1512	-0.1708	-0.2447	-0.0865	-0.012	-0.1038	-0.1984	-0.0492	-0.0051	0.0103	-0.1554	-0.1341	0.0086	-0.2164	-0.0274	-0.0996	-0.0663	-0.1315	0.0171	0.0559	0.0654	0.0282	0.042	-0.2413	-0.3377	0.0425
19.1667	-0.1216	0.0806	-0.0728	-0.2	-0.4616	-0.0808	-0.0724	-0.3138	-0.0605	-0.213	-0.2783	-0.0887	-0.5024	-0.1651	0.0934	-0.2099	-0.138	-0.2224	-0.2577	-0.1758	-0.0793	-0.2328	-0.2335	-0.1435	-0.1811	-0.2385	-0.0973	-0.0099	-0.0917	-0.1829	-0.0553	0.0042	0.0095	-0.1632	-0.136	0.0022	-0.2175	-0.0331	-0.0972	-0.0725	-0.1345	0.0107	0.0598	0.0641	0.0229	0.048	-0.2382	-0.3422	0.048
19.2	-0.1189	0.0763	-0.0706	-0.2146	-0.4736	-0.0801	-0.0669	-0.3085	-0.0613	-0.2055	-0.2764	-0.0941	-0.5014	-0.1524	0.0781	-0.2031	-0.1305	-0.2208	-0.26	-0.175	-0.0755	-0.2272	-0.2309	-0.132	-0.1914	-0.227	-0.1049	-0.0051	-0.0755	-0.1812	-0.0523	0.0165	0.0097	-0.1678	-0.1421	-0.0037	-0.2203	-0.0359	-0.1051	-0.0712	-0.1297	0.0122	0.0629	0.0673	0.036	0.0555	-0.2324	-0.3387	0.0542
19.2333	-0.1169	0.0711	-0.0883	-0.2288	-0.4753	-0.078	-0.0812	-0.3127	-0.0597	-0.1968	-0.2688	-0.0871	-0.4998	-0.1413	0.0678	-0.1986	-0.1394	-0.2216	-0.2617	-0.1801	-0.0771	-0.2253	-0.2143	-0.1217	-0.1948	-0.2129	-0.1267	-0.0062	-0.0703	-0.1774	-0.0433	0.0325	0.0132	-0.1566	-0.1422	-0.007	-0.2189	-0.0391	-0.1062	-0.0754	-0.1272	0.0147	0.0674	0.076	0.0454	0.0623	-0.231	-0.3424	0.0533
19.2667	-0.1158	0.07	-0.101	-0.2337	-0.4692	-0.0763	-0.0934	-0.3175	-0.0598	-0.1969	-0.2571	-0.0804	-0.4986	-0.1273	0.0613	-0.203	-0.1427	-0.2287	-0.2525	-0.1916	-0.0804	-0.2258	-0.2042	-0.1265	-0.1919	-0.2004	-0.1359	-0.0077	-0.0697	-0.1819	-0.0423	0.0485	0.0094	-0.1602	-0.1418	-0.0102	-0.2191	-0.0356	-0.1121	-0.0731	-0.1347	0.0153	0.073	0.0801	0.0375	0.0731	-0.2231	-0.3343	0.0531
19.3	-0.1186	0.0535	-0.1004	-0.236	-0.4713	-0.0815	-0.0926	-0.3098	-0.0645	-0.1876	-0.2485	-0.0738	-0.4881	-0.1193	0.055	-0.2192	-0.1424	-0.2213	-0.2508	-0.2021	-0.0808	-0.2341	-0.2044	-0.1314	-0.1884	-0.1995	-0.14	-0.006	-0.0678	-0.1982	-0.0481	0.0592	0.0072	-0.1692	-0.1332	-0.0094	-0.2168	-0.0289	-0.1071	-0.0706	-0.1174	0.0074	0.0801	0.0783	0.0327	0.0727	-0.2127	-0.3292	0.0468
19.3333	-0.1348	0.0387	-0.108	-0.2597	-0.4611	-0.1018	-0.0912	-0.3005	-0.0761	-0.1833	-0.24	-0.0642	-0.4853	-0.118	0.0528	-0.2189	-0.146	-0.2188	-0.2452	-0.2205	-0.0868	-0.235	-0.1991	-0.1453	-0.1891	-0.1932	-0.1439	0.0011	-0.0579	-0.2	-0.0481	0.0618	0.005	-0.1658	-0.1336	-0.0079	-0.2147	-0.0272	-0.0987	-0.069	-0.1086	0.0054	0.0841	0.076	0.0215	0.0766	-0.2046	-0.3251	0.0492
19.3667	-0.1507	0.0351	-0.1076	-0.2728	-0.4552	-0.1101	-0.1015	-0.296	-0.0834	-0.1843	-0.2374	-0.0654	-0.4813	-0.1231	0.0387	-0.2191	-0.1469	-0.2093	-0.2498	-0.235	-0.0807	-0.2324	-0.1948	-0.1571	-0.1869	-0.1808	-0.1515	0.0046	-0.0684	-0.1995	-0.0514	0.0604	0.0026	-0.1764	-0.1325	-0.0079	-0.214	-0.0305	-0.0969	-0.0744	-0.1069	0.0036	0.0838	0.0734	0.0063	0.0823	-0.196	-0.3238	0.0448
19.4	-0.1646	0.0313	-0.108	-0.2668	-0.459	-0.1119	-0.1099	-0.2974	-0.0852	-0.1851	-0.2391	-0.0705	-0.4818	-0.1216	0.0303	-0.2129	-0.1434	-0.2013	-0.246	-0.2451	-0.0737	-0.2289	-0.1997	-0.1573	-0.1951	-0.1842	-0.1638	0.007	-0.0708	-0.1952	-0.0494	0.0596	-0.0031	-0.1789	-0.1349	-0.0146	-0.2132	-0.03	-0.0962	-0.086	-0.1078	-0.0026	0.086	0.0791	0.0011	0.0825	-0.1908	-0.3195	0.0433
19.4333	-0.1819	0.0243	-0.1045	-0.2596	-0.4538	-0.1015	-0.1226	-0.299	-0.0876	-0.186	-0.24	-0.08	-0.4826	-0.1259	0.0232	-0.2095	-0.1393	-0.1907	-0.2495	-0.2498	-0.0879	-0.2253	-0.1968	-0.1595	-0.2041	-0.1805	-0.1648	0.0073	-0.0777	-0.1539	-0.0413	0.0557	-0.014	-0.1822	-0.1313	-0.0172	-0.2115	-0.0244	-0.1001	-0.0886	-0.1107	-0.0094	0.0808	0.0741	-0.0103	0.0862	-0.1784	-0.3132	0.0531
19.4667	-0.1949	0.0162	-0.1103	-0.2618	-0.4505	-0.1004	-0.1301	-0.3048	-0.0872	-0.1938	-0.2453	-0.0796	-0.4774	-0.1325	0.0248	-0.2077	-0.1296	-0.1814	-0.2562	-0.2435	-0.1037	-0.2106	-0.1921	-0.1546	-0.204	-0.1747	-0.1757	0.0011	-0.0865	-0.1779	-0.0418	0.041	-0.0138	-0.1841	-0.1375	-0.021	-0.2104	-0.0225	-0.0992	-0.0916	-0.1118	-0.0225	0.0763	0.0776	-0.0236	0.0932	-0.1717	-0.3056	0.0761
19.5	-0.1994	0.0077	-0.1304	-0.2626	-0.4508	-0.1022	-0.1359	-0.3144	-0.0858	-0.1923	-0.258	-0.0787	-0.4773	-0.1383	0.0201	-0.2021	-0.1202	-0.1759	-0.2622	-0.2325	-0.1203	-0.1893	-0.1924	-0.1495	-0.2142	-0.1689	-0.1805	-0.0105	-0.0992	-0.1778	-0.0406	0.0331	0.0046	-0.187	-0.1383	-0.0215	-0.208	-0.0173	-0.0981	-0.0914	-0.1147	-0.0457	0.0632	0.0789	-0.0251	0.0904	-0.1644	-0.2988	0.0824
19.5333	-0.1991	0.0111	-0.1472	-0.2757	-0.4431	-0.099	-0.1401	-0.3198	-0.0813	-0.1887	-0.2582	-0.0784	-0.4806	-0.1476	0.0274	-0.1962	-0.1077	-0.1715	-0.2634	-0.2226	-0.1287	-0.1686	-0.1952	-0.1449	-0.2275	-0.1664	-0.1912	-0.0209	-0.0982	-0.1713	-0.0444	0.0243	-0.0005	-0.2166	-0.1391	-0.0236	-0.2065	-0.01	-0.0977	-0.0942	-0.1191	-0.0305	0.0482	0.0805	-0.0253	0.0919	-0.1563	-0.2977	0.0818
19.5667	-0.2044	0.0133	-0.1296	-0.2838	-0.4326	-0.0995	-0.1444	-0.3202	-0.0767	-0.1848	-0.2704	-0.0795	-0.4901	-0.1519	0.0245	-0.195	-0.0953	-0.1664	-0.2503	-0.2121	-0.1401	-0.1611	-0.199	-0.1446	-0.2395	-0.178	-0.2015	-0.0277	-0.0965	-0.1515	-0.0446	0.0238	-0.0104	-0.2048	-0.1418	-0.0308	-0.207	-0.009	-0.0957	-0.0851	-0.1295	-0.0341	0.0489	0.0922	-0.0253	0.0745	-0.1512	-0.2951	0.0832
19.6	-0.2114	0.0158	-0.1164	-0.2841	-0.4189	-0.096	-0.1485	-0.3239	-0.0743	-0.1857	-0.2614	-0.0828	-0.4892	-0.1673	0.0308	-0.2071	-0.0862	-0.1637	-0.2286	-0.2015	-0.1499	-0.1592	-0.2018	-0.1531	-0.2487	-0.2024	-0.2071	-0.0314	-0.0951	-0.1276	-0.0509	0.0265	-0.0181	-0.2165	-0.1402	-0.036	-0.2061	-0.0029	-0.0941	-0.0911	-0.1385	-0.0426	0.045	0.0813	-0.0219	0.0559	-0.1476	-0.3	0.0815
19.6333	-0.2251	0.0189	-0.1002	-0.2862	-0.4066	-0.1081	-0.1527	-0.3253	-0.0746	-0.1891	-0.256	-0.0854	-0.4884	-0.1783	0.0353	-0.2124	-0.084	-0.172	-0.2081	-0.1905	-0.1684	-0.1546	-0.2061	-0.153	-0.2651	-0.2105	-0.208	-0.0322	-0.0978	-0.1184	-0.0525	0.0281	-0.0197	-0.2244	-0.1399	-0.0358	-0.2019	0.0001	-0.0995	-0.0931	-0.1415	-0.046	0.0457	0.0828	-0.0231	0.0603	-0.1451	-0.3021	0.075
19.6667	-0.235	0.0209	-0.0984	-0.2741	-0.3908	-0.1167	-0.1527	-0.3293	-0.0807	-0.1922	-0.2472	-0.0855	-0.49	-0.1857	0.043	-0.2073	-0.0775	-0.1608	-0.1924	-0.1729	-0.1755	-0.148	-0.21	-0.1503	-0.2682	-0.2264	-0.2052	-0.0312	-0.1075	-0.112	-0.0526	0.0282	-0.0208	-0.2325	-0.1338	-0.0333	-0.2011	-0.0011	-0.121	-0.0955	-0.1347	-0.0529	0.0526	0.0832	-0.019	0.0489	-0.1457	-0.3037	0.0579
19.7	-0.2351	0.0282	-0.0794	-0.2503	-0.3762	-0.1277	-0.1464	-0.3384	-0.0841	-0.1957	-0.242	-0.0907	-0.489	-0.1972	0.0521	-0.1987	-0.0825	-0.1563	-0.182	-0.1717	-0.1731	-0.1454	-0.2075	-0.144	-0.2726	-0.2316	-0.2047	-0.0348	-0.1124	-0.1162	-0.0537	0.029	-0.041	-0.2356	-0.1272	-0.0445	-0.2003	-0.0001	-0.1136	-0.0929	-0.1323	-0.0589	0.0437	0.085	-0.0211	0.0429	-0.1439	-0.3033	0.0482
19.7333	-0.2303	0.0524	-0.0669	-0.2146	-0.3671	-0.1342	-0.1384	-0.3503	-0.0895	-0.1966	-0.2396	-0.1022	-0.4895	-0.2054	0.0587	-0.201	-0.089	-0.157	-0.1755	-0.1676	-0.1817	-0.1413	-0.2067	-0.137	-0.273	-0.2334	-0.2084	-0.0354	-0.122	-0.1004	-0.0552	0.0487	-0.0599	-0.2491	-0.1316	-0.0562	-0.1974	-0.0046	-0.1257	-0.089	-0.1462	-0.0635	0.041	0.0829	-0.0276	0.0396	-0.1385	-0.3037	0.0386
19.7667	-0.2303	0.0691	-0.0502	-0.2008	-0.3621	-0.1386	-0.1364	-0.3468	-0.0928	-0.1995	-0.245	-0.1281	-0.4954	-0.2064	0.0655	-0.2015	-0.0765	-0.162	-0.1831	-0.1646	-0.1851	-0.1354	-0.1964	-0.129	-0.2714	-0.2478	-0.2073	-0.0338	-0.1296	-0.0989	-0.0578	0.0591	-0.0729	-0.2515	-0.1374	-0.0583	-0.1969	-0.0099	-0.1293	-0.0904	-0.1638	-0.0684	0.033	0.0862	-0.0314	0.0401	-0.1449	-0.3026	0.0254
19.8	-0.2278	0.0872	-0.0424	-0.2279	-0.3527	-0.1419	-0.1389	-0.3452	-0.0952	-0.2017	-0.2484	-0.1432	-0.5004	-0.2127	0.0726	-0.1954	-0.0784	-0.1576	-0.1852	-0.1625	-0.2038	-0.1357	-0.1821	-0.1236	-0.2703	-0.2615	-0.2051	-0.0311	-0.127	-0.0833	-0.0604	0.0615	-0.0797	-0.2477	-0.1351	-0.0535	-0.1986	-0.0133	-0.1315	-0.0894	-0.1729	-0.0845	0.0304	0.0844	-0.0384	0.0439	-0.1553	-0.3017	0.0241
19.8333	-0.2272	0.0991	-0.0402	-0.2201	-0.3486	-0.1504	-0.135	-0.3414	-0.1015	-0.1984	-0.2504	-0.1566	-0.5067	-0.2055	0.0689	-0.2034	-0.0853	-0.1522	-0.187	-0.1514	-0.1997	-0.1336	-0.1723	-0.1226	-0.27	-0.2709	-0.2034	-0.0278	-0.1293	-0.0774	-0.0589	0.068	-0.0801	-0.2514	-0.1434	-0.0572	-0.1992	-0.0218	-0.1298	-0.0931	-0.1807	-0.0971	0.0205	0.0817	-0.0415	0.0441	-0.1617	-0.2912	0.0269
19.8667	-0.2185	0.108	-0.062	-0.2293	-0.3474	-0.1538	-0.1431	-0.339	-0.1048	-0.2019	-0.2536	-0.15	-0.5018	-0.207	0.0586	-0.2085	-0.089	-0.1514	-0.1848	-0.1526	-0.1871	-0.1327	-0.1643	-0.1195	-0.27	-0.2769	-0.2043	-0.0269	-0.1346	-0.0809	-0.0646	0.0811	-0.0786	-0.2602	-0.1464	-0.0543	-0.2003	-0.0273	-0.1383	-0.0898	-0.188	-0.1069	0.0204	0.0738	-0.04	0.057	-0.163	-0.2883	0.0309
19.9	-0.2143	0.1105	-0.0425	-0.2264	-0.3504	-0.1532	-0.1425	-0.3326	-0.1159	-0.1992	-0.2531	-0.1474	-0.4868	-0.212	0.0541	-0.209	-0.0924	-0.1499	-0.184	-0.1634	-0.1866	-0.1377	-0.1596	-0.1203	-0.2739	-0.2807	-0.2076	-0.025	-0.1381	-0.0777	-0.0804	0.0877	-0.0656	-0.2724	-0.1524	-0.0567	-0.2015	-0.0308	-0.143	-0.0922	-0.1962	-0.111	0.0225	0.0558	-0.0401	0.0621	-0.1605	-0.2706	0.0303
19.9333	-0.2104	0.1114	-0.0275	-0.2239	-0.3481	-0.145	-0.1452	-0.3228	-0.1248	-0.1967	-0.2475	-0.1429	-0.4907	-0.2099	0.0441	-0.1915	-0.1001	-0.1521	-0.1946	-0.1508	-0.1813	-0.1461	-0.1586	-0.1149	-0.2744	-0.2853	-0.2085	-0.0277	-0.1293	-0.0724	-0.0896	0.0885	-0.065	-0.2907	-0.1637	-0.0548	-0.202	-0.0418	-0.1389	-0.0967	-0.2029	-0.1152	0.0206	0.0489	-0.0449	0.0673	-0.1686	-0.2749	0.0176
19.9667	-0.2054	0.1135	-0.0257	-0.2046	-0.3458	-0.1403	-0.1572	-0.3163	-0.1348	-0.1918	-0.2347	-0.1412	-0.4899	-0.2079	0.0377	-0.1909	-0.1044	-0.1564	-0.2062	-0.1445	-0.1777	-0.1421	-0.1603	-0.1143	-0.2725	-0.2807	-0.2042	-0.0441	-0.1303	-0.0562	-0.0918	0.0699	-0.072	-0.3001	-0.1724	-0.0592	-0.2053	-0.0421	-0.1349	-0.0977	-0.2127	-0.1219	0.0199	0.0441	-0.0518	0.075	-0.1705	-0.275	0.0165
20	-0.1995	0.1193	-0.0389	-0.1924	-0.3416	-0.1326	-0.1554	-0.3111	-0.1426	-0.193	-0.2291	-0.1354	-0.4804	-0.2071	0.0314	-0.1937	-0.1021	-0.1632	-0.2083	-0.1275	-0.1837	-0.1343	-0.1599	-0.1139	-0.2764	-0.2819	-0.2015	-0.0433	-0.1287	-0.0551	-0.0886	0.0612	-0.0612	-0.3026	-0.179	-0.0644	-0.204	-0.0365	-0.1379	-0.1029	-0.2202	-0.1298	0.0105	0.049	-0.0494	0.082	-0.1712	-0.2727	0.0009
[truncated: 79 more columns]

## Sheet: Figure 3B
Empty-split	SS81353	SS81521	MB011B
-0.0690377	0.409	0.357	0.1626
-0.0299197	0.0573	0.0363	0.2277
0.207934	-0.1142	0.2153	0.4635
0.0678705	0.3424	0.1361	0.2752
-0.019639	0.273	0.2254	-0.0089
0.107779	0.1984	0.1216	0.3545
0.0145033	0.3359	0.1962	0.189
-0.0365525	0.0938	0.1398	0.2306
0.0978148	0.1625	0.2	0.3205
0.164598	0.042	0.2361	0.2257
-0.130713	0.0991	0.3493	0.212
-0.0917115	0.252	0.1987	0.0176
-0.143167	0.0898	0.2472	0.2765
0.00646066	0.349	0.2741	0.2224
-0.132228	0.2137		0.322
-0.0292295	0.139		0.2779
0.0395541			0.0912
-0.0778918			0.0405
0.0798885			0.1752
-0.0501066			0.2168
0.131836			0.2079
-0.112859			0.1943
-0.0106131			0.3428
-0.0175098			0.3036
-0.00448033			0.2609
-0.0273984			0.1364
-0.10721			0.3593
0.156764			0.2204
0.13501			0.1942
-0.215916			0.1938
-0.0486852			0.073
0.172543			0.2153
0.0534541
0.14602
0.0467246
0.0501328
0.0536361
0.00837377
0.0688475
-0.0193475
0.060382
-0.0261918
0.41878
0.298439
0.274766
0.080318
-0.00972951
-0.105357
0.107043
0.109249
-0.146207
-0.154608
-0.00234098
-0.0891951
0.0239033
-0.268951
0.0116344
0.0876475
-0.023959
0.102439
-0.0663443
0.214093
0.0227262
0.059482
-0.0146672
-0.120697

## Sheet: Figure 3C
Time (s)	Empty-split	Empty-split	Empty-split	Empty-split	Empty-split	Empty-split	Empty-split	Empty-split	Empty-split	Empty-split	Empty-split	Empty-split	Empty-split	Empty-split	Empty-split	Empty-split	Empty-split	Empty-split	Empty-split	Empty-split	Empty-split	Empty-split	Empty-split	Empty-split	Empty-split	Empty-split	Empty-split	Empty-split	Empty-split	Empty-split	Empty-split	Empty-split	Empty-split	Empty-split	Empty-split	Empty-split	Empty-split	Empty-split	Empty-split	Empty-split	Empty-split	Empty-split	Empty-split	Empty-split	Empty-split	Empty-split	Empty-split	Empty-split	Empty-split
	0.232109	0.389081	0.545804	0.409288	1.41913	1.34644	0.858995	1.01804	0.392698	0.603573	1.33159	0.991729	1.21071	1.1098	1.34932	1.18972	1.20559	1.33166	1.24533	1.93599	1.5614	1.42226	1.18569	1.06118	1.43436	1.03233	0.679589	0.772985	0.795679	0.613614	0.804812	0.581473	0.387316	0.382453	0.868062	0.90057	0.71573	1.05254	1.05243	0.966502	0.920549	0.78555	1.21822	0.820982	0.583536	0.343107	0.632555	0.446939	0.670422
-4.9667	0.189	0.209	0.2268	0.1166	0.4228	0.3916	0.1551	0.4336	0.1069	0.3462	0.3283	0.4155	0.6543	0.6848	0.7895	0.4076	1.0621	0.6946	0.2909	0.4799	0.4846	0.3624	0.1326	0.0462	0.049	0.1269	0.3495	0.0307	0.3798	0.0073	0.7121	0.4725	0.4032	0.548	0.4113	0.5073	0.418	0.4071	0.1079	0.4477	0.0865	0.4733	0.1997	0.2514	0.4456	0.2561	0.1755	0.3238	0.5422
-4.9333	0.2251	0.2137	0.2562	0.0974	0.3915	0.3195	0.1665	0.4262	0.1126	0.3315	0.4144	0.4082	0.6838	0.6863	0.8403	0.3874	1.0998	0.6689	0.2583	0.5263	0.2843	0.4034	0.1848	0.0437	0.1135	0.2053	0.4172	0.0763	0.3675	0.0006	0.6161	0.4461	0.3738	0.4189	0.3681	0.4629	0.4329	0.4025	0.1044	0.4914	0.1302	0.4738	0.1453	0.2895	0.4673	0.2509	0.2594	0.3724	0.7052
-4.9	0.1087	0.2663	0.3082	0.0635	0.3285	0.2646	0.1669	0.4397	0.091	0.4085	0.3927	0.33	0.6975	0.597	0.7231	0.5238	0.9879	0.6455	0.2116	0.5154	0.3776	0.5138	0.2375	0.0456	0.2336	0.2105	0.303	0.0816	0.6938	0.0057	0.6549	0.5027	0.3528	0.4334	0.3672	0.4034	0.4333	0.3938	0.109	0.5189	0.1534	0.4935	0.218	0.2986	0.4679	0.2603	0.187	0.3531	0.7203
-4.8667	0.1163	0.2196	0.2653	0.0699	0.3659	0.2712	0.1712	0.4511	0.1349	0.4311	0.4704	0.2636	0.6784	0.6625	0.6827	0.5016	1.0454	0.6411	0.1643	0.4958	0.435	0.5992	0.3431	0.0306	0.1411	0.1611	0.2663	0.1004	0.735	-0.0072	0.7063	0.4897	0.3646	0.6151	0.3848	0.3928	0.4792	0.3985	0.1371	0.4606	0.1187	0.4877	0.2315	0.3159	0.4561	0.2764	0.21	0.3586	0.6347
-4.8333	0.2058	0.2153	0.2353	0.0515	0.3815	0.2953	0.1656	0.3824	0.0696	0.3814	0.4817	0.2526	0.6672	0.651	0.6864	0.6022	1.0123	0.6378	0.1352	0.4965	0.3908	0.5726	0.3309	0.0172	0.1176	0.1647	0.3059	0.1053	0.5277	-0.0164	0.616	0.4507	0.4057	0.4297	0.4136	0.4	0.4613	0.4012	0.1997	0.3976	0.1204	0.4692	0.3573	0.3059	0.4484	0.2508	0.2911	0.4397	0.7471
-4.8	0.2504	0.1788	0.2839	0.1083	0.3898	0.3272	0.192	0.4083	0.0865	0.3673	0.334	0.208	0.5841	0.5604	0.7559	0.5239	0.9614	0.657	0.1584	0.4688	0.3327	0.4856	0.2911	0.0242	0.1344	0.2256	0.2746	0.0791	0.4415	-0.0308	0.6288	0.3913	0.4166	0.4919	0.3709	0.3858	0.4485	0.3509	0.1481	0.4112	0.1391	0.4599	0.3669	0.3346	0.4055	0.305	0.1901	0.4604	0.7023
-4.7667	0.3982	0.1623	0.3426	0.1202	0.3066	0.2899	0.2032	0.4245	0.1062	0.4563	0.3294	0.2485	0.5792	0.5618	0.8444	0.4328	0.7541	0.6972	0.188	0.432	0.2464	0.4786	0.2986	0.0532	0.114	0.2331	0.2794	0.0669	0.3616	-0.092	0.6513	0.461	0.4331	0.4556	0.3431	0.4432	0.4394	0.3683	0.184	0.3623	0.1106	0.4799	0.4061	0.2703	0.4304	0.2639	0.3153	0.4381	0.7488
-4.7333	0.4272	0.1065	0.4468	0.1601	0.3788	0.2527	0.239	0.4188	0.1175	0.4873	0.3773	0.3035	0.5892	0.6483	0.7125	0.4273	0.761	0.7138	0.2184	0.4438	0.3308	0.5255	0.1803	0.072	0.1027	0.2448	0.2961	0.1069	0.3889	-0.0093	0.6175	0.4564	0.3609	0.4738	0.3399	0.473	0.4999	0.3641	0.1904	0.3869	0.0929	0.4252	0.4268	0.2129	0.4193	0.3402	0.1762	0.5123	0.737
-4.7	0.4423	0.0838	0.4733	0.1404	0.3354	0.2379	0.2079	0.4743	0.1172	0.5264	0.269	0.3688	0.5211	0.6152	0.7017	0.4644	0.8683	0.7317	0.1878	0.5172	0.24	0.5479	0.211	0.0814	0.1158	0.1529	0.2062	0.0951	0.5055	0.0043	0.5944	0.4012	0.382	0.4015	0.3556	0.4319	0.4679	0.3193	0.1691	0.5341	0.076	0.428	0.3848	0.2315	0.367	0.2727	0.1839	0.636	0.792
-4.6667	0.4342	0.0704	0.4733	0.1356	0.3262	0.2542	0.2194	0.4405	0.1189	0.5557	0.2643	0.3807	0.533	0.6012	0.6494	0.4227	0.7319	0.7432	0.1811	0.5608	-0.1465	0.5592	0.2786	0.0664	0.1213	0.1587	0.2358	0.075	0.5467	0.014	0.6291	0.3527	0.3725	0.3931	0.3291	0.4393	0.4636	0.3264	0.1864	0.5913	0.0324	0.4167	0.3739	0.2576	0.3457	0.3299	0.1702	0.6785	0.9173
-4.6333	0.3966	0.054	0.3841	0.2174	0.3444	0.2557	0.2032	0.3804	0.1147	0.5619	0.3369	0.3966	0.5319	0.7156	0.5725	0.4688	0.7514	0.6929	0.3028	0.5431	0.133	0.4677	0.3631	0.0374	0.0476	0.1898	0.3011	0.055	0.4954	0.0163	0.586	0.3523	0.4153	0.3135	0.3212	0.4206	0.4322	0.3093	0.1766	0.5626	0.0446	0.4313	0.3589	0.2286	0.3366	0.336	0.1346	0.6162	0.9886
-4.6	0.4582	0.0742	0.3595	0.3016	0.4402	0.2725	0.2934	0.4383	0.1156	0.4543	0.4359	0.4425	0.5598	0.6476	0.5444	0.4105	0.6952	0.5222	0.3875	0.5714	0.2008	0.5508	0.5351	0.0664	0.0279	0.2053	0.2666	0.0635	0.4077	0.0824	0.5617	0.4159	0.4098	0.3213	0.3559	0.4286	0.4585	0.313	0.151	0.5313	0.0829	0.4406	0.3473	0.2525	0.3346	0.2735	0.0948	0.6457	0.9734
-4.5667	0.5468	0.1112	0.3669	0.2735	0.465	0.2961	0.2377	0.4662	0.1231	0.3974	0.5712	0.3376	0.5364	0.6633	0.6273	0.3802	0.7339	0.5302	0.2917	0.6538	0.2218	0.6345	0.3916	0.0894	0.0324	0.2376	0.3388	0.0734	0.4403	0.1095	0.6293	0.446	0.3843	0.2611	0.381	0.4769	0.5078	0.3211	0.1531	0.537	0.0807	0.4328	0.3274	0.2992	0.3212	0.3601	0.2472	0.611	0.9601
-4.5333	0.5999	0.0849	0.2962	0.2569	0.3457	0.2822	0.2064	0.386	0.1567	0.3438	0.4484	0.4093	0.5289	0.678	0.529	0.4132	0.8031	0.5512	0.2071	0.6736	0.2542	0.6041	0.2831	0.0784	0.0565	0.1981	0.3744	0.1444	0.3139	0.0473	0.6606	0.4343	0.4028	0.2321	0.3611	0.4867	0.4796	0.3215	0.139	0.48	0.1191	0.4821	0.3551	0.257	0.3417	0.3419	0.2867	0.643	1.154
-4.5	0.5586	0.1062	0.3212	0.2985	0.2593	0.3143	0.2195	0.3881	0.1655	0.343	0.3997	0.3742	0.5239	0.6198	0.5082	0.4174	0.7907	0.5718	0.3049	0.6384	0.3189	0.6269	0.1065	0.0602	0.0557	0.197	0.3034	0.2204	0.2291	0.0587	0.7086	0.4244	0.3548	0.4456	0.3877	0.4527	0.4669	0.309	0.1301	0.4484	0.1073	0.4766	0.3989	0.2401	0.3412	0.3214	0.3155	0.604	1.0626
-4.4667	0.6084	0.1392	0.1489	0.3767	0.2776	0.299	0.2874	0.3243	0.1484	0.365	0.3886	0.3186	0.5209	0.5948	0.5599	0.5037	0.7764	0.5623	0.3706	0.5573	0.243	0.5155	0.3172	0.0418	0.0828	0.1756	0.3086	0.1924	0.3655	0.0518	0.6177	0.4779	0.3413	0.4244	0.3582	0.4966	0.5108	0.2922	0.1693	0.532	0.1147	0.48	0.4061	0.188	0.3584	0.309	0.2532	0.4771	1.075
-4.4333	0.5642	0.1459	0.2423	0.3491	0.3159	0.2401	0.2402	0.2911	0.1639	0.3588	0.4229	0.3622	0.5085	0.6645	0.4879	0.4427	0.5997	0.6197	0.2489	0.5554	0.2468	0.5654	0.3179	0.0405	0.0711	0.1641	0.3397	0.2316	0.3843	0.0459	0.6263	0.5499	0.2817	0.3781	0.3556	0.4798	0.4819	0.3023	0.1964	0.482	0.1448	0.5731	0.4096	0.2265	0.3972	0.2881	0.2488	0.4144	1.1021
-4.4	0.5659	0.1181	0.4368	0.2799	0.3747	0.3014	0.2575	0.206	0.1251	0.32	0.5339	0.3309	0.5422	0.5987	0.5297	0.4517	0.5941	0.5876	0.169	0.58	0.3407	0.53	0.2173	0.052	0.0854	0.1621	0.2986	0.1865	0.297	0.047	0.5998	0.4103	0.2471	0.3259	0.3609	0.4857	0.4685	0.2892	0.1615	0.4912	0.167	0.4782	0.3965	0.2138	0.4349	0.2745	0.1555	0.4578	0.8716
-4.3667	0.5865	0.1522	0.8332	0.2355	0.3847	0.3175	0.2943	0.205	0.0957	0.3999	0.548	0.3923	0.5709	0.6484	0.5807	0.4247	0.618	0.625	0.1635	0.6068	0.3513	0.6146	0.2512	0.0754	0.0589	0.163	0.2535	0.1531	0.2762	0.014	0.5386	0.2989	0.2959	0.2909	0.3458	0.5187	0.4912	0.3262	0.1833	0.4352	0.2028	0.429	0.378	0.1473	0.4316	0.2804	0.1066	0.4053	0.8621
-4.3333	0.4723	0.1237	0.4803	0.1978	0.3634	0.3542	0.3008	0.2536	0.1341	0.4566	0.3113	0.3368	0.5771	0.6264	0.5706	0.4603	0.7014	0.5767	0.1088	0.5994	0.3186	0.5411	0.2018	0.0307	-0.0798	0.1923	0.2846	0.1624	0.305	0.0281	0.5607	0.2713	0.28	0.2871	0.3155	0.5082	0.4925	0.3088	0.1658	0.4501	0.3249	0.4157	0.4013	0.1308	0.4729	0.2611	0.1054	0.4018	0.8347
-4.3	0.4652	0.1368	0.3019	0.2432	0.3458	0.2824	0.2927	0.2416	0.1517	0.5565	0.2006	0.3101	0.5903	0.4977	0.5475	0.5062	0.7478	0.4964	0.0685	0.7754	0.2512	0.4246	0.2696	0.0396	0.1731	0.1939	0.2375	0.1618	0.2962	0.0425	0.5565	0.3276	0.2225	0.2607	0.2975	0.5496	0.5205	0.3085	0.1621	0.4225	0.1344	0.457	0.3341	0.1784	0.4053	0.2407	0.0773	0.3878	0.8025
-4.2667	0.4975	0.1183	0.1715	0.1932	0.401	0.2378	0.3243	0.2561	0.1406	0.648	0.1595	0.3708	0.5944	0.4533	0.4998	0.4356	0.6643	0.4825	0.0615	0.8684	0.3112	0.4315	0.1778	0.0377	0.1568	0.1852	0.1289	0.1737	0.2901	0.0382	0.5867	0.2852	0.1838	0.3485	0.3117	0.4577	0.4914	0.271	0.1731	0.442	0.0064	0.497	0.3608	0.1882	0.383	0.2746	0.1039	0.4247	0.6955
-4.2333	0.4892	0.1186	0.2075	0.249	0.4518	0.2357	0.3066	0.3072	0.1324	0.6512	0.1487	0.3315	0.5398	0.4666	0.5171	0.4876	0.8152	0.5025	0.0307	0.8912	0.3443	0.4675	0.1026	0.0751	0.1274	0.1662	0.071	0.1459	0.2711	0.0277	0.5655	0.3234	0.1995	0.4609	0.3247	0.4766	0.5206	0.2447	0.188	0.4416	-0.0235	0.5311	0.3729	0.1809	0.3856	0.2749	0.1233	0.3732	0.7221
-4.2	0.4791	0.1072	0.2123	0.3048	0.5537	0.1794	0.2681	0.3643	0.1404	0.5402	0.2616	0.3113	0.617	0.5554	0.4843	0.5277	0.7269	0.4882	0.0306	0.9061	0.3457	0.5322	0.11	0.0417	0.0858	0.1621	0.0043	0.1676	0.2846	0.0237	0.6305	0.3429	0.2264	0.4283	0.3203	0.4769	0.5665	0.2437	0.1678	0.4625	0.0276	0.5738	0.4075	0.2323	0.3514	0.2974	0.0963	0.3383	0.826
-4.1667	0.4662	0.1208	0.1863	0.2021	0.5682	0.2405	0.2655	0.4214	0.0795	0.5469	0.3439	0.3709	0.7029	0.5141	0.4506	0.4528	0.7682	0.4779	0.0459	0.8566	0.3317	0.4897	0.1535	0.0479	0.1043	0.2107	-0.0288	0.1982	0.3092	0.0072	0.6574	0.365	0.2282	0.4669	0.2946	0.4659	0.5019	0.2518	0.2182	0.4413	0.1595	0.5418	0.4446	0.2625	0.3057	0.2787	0.0991	0.3159	0.9043
-4.1333	0.4371	0.1816	0.1705	0.1882	0.5421	0.2525	0.2676	0.4137	0.0625	0.5454	0.4071	0.3998	0.6436	0.5175	0.4709	0.4523	0.7942	0.4609	0.067	0.8175	0.2836	0.5802	0.1646	0.0228	0.1034	0.2671	-0.0348	0.2037	0.3493	0.0071	0.7023	0.394	0.2116	0.2599	0.2959	0.4783	0.4981	0.2387	0.1725	0.3931	0.1176	0.5751	0.4088	0.317	0.3048	0.2683	0.0513	0.3202	0.9283
-4.1	0.3743	0.1564	0.3077	0.2357	0.5563	0.2538	0.3102	0.515	0.0737	0.5266	0.3857	0.428	0.6912	0.6142	0.5027	0.4615	0.8343	0.5409	0.0965	0.8028	0.335	0.5528	0.166	0.0194	-0.051	0.2224	-0.0111	0.1772	0.3495	0.0435	0.6643	0.3846	0.3175	0.2679	0.2521	0.4718	0.4862	0.2592	0.132	0.3341	0.1094	0.6335	0.4466	0.2346	0.3782	0.2985	0.0434	0.251	0.8915
-4.0667	0.3834	0.1434	0.4069	0.2461	0.482	0.244	0.304	0.5072	0.0517	0.6515	0.5439	0.4024	0.7301	0.5593	0.5499	0.4736	0.878	0.4802	0.0953	0.8331	0.4291	0.4763	0.2992	0.0149	0.0967	0.2482	0.0075	0.1605	0.4071	0.0918	0.6889	0.4475	0.2414	0.3007	0.2453	0.3971	0.485	0.2846	0.0538	0.2824	0.0861	0.4742	0.4763	0.1508	0.406	0.3955	0.0461	0.198	0.9485
-4.0333	0.3541	0.1394	0.3603	0.1496	0.607	0.2523	0.2568	0.5034	0.0492	0.5164	0.521	0.3925	0.7431	0.5585	0.6025	0.4245	0.864	0.5476	0.1033	0.7929	0.5483	0.5073	0.3593	0.0127	0.2049	0.2399	0.0595	0.1842	0.4035	0.1051	0.7154	0.3363	0.2381	0.2826	0.2864	0.4075	0.4559	0.2732	0.0834	0.3102	0.0905	0.4758	0.3728	0.1085	0.4277	0.3501	0.0807	0.2316	0.888
-4	0.3767	0.1019	0.3212	0.127	0.6442	0.2558	0.1923	0.3934	0.0603	0.4917	0.5439	0.3472	0.6788	0.6245	0.6284	0.4928	0.8218	0.5257	0.0574	0.7273	0.5374	0.5576	0.3476	0.0232	0.1628	0.2223	0.0852	0.1899	0.4672	0.1552	0.6736	0.4114	0.2278	0.2563	0.3079	0.3826	0.3813	0.3226	0.111	0.3251	0.1197	0.485	0.3545	0.1127	0.4546	0.3799	0.0855	0.2558	1.0002
-3.9667	0.3772	0.2255	0.2147	0.1366	0.5125	0.2734	0.1767	0.3811	0.0631	0.4513	0.7119	0.3893	0.6396	0.7346	0.5856	0.4284	0.8815	0.6912	0.1018	0.7154	0.6038	0.505	0.395	0.0434	0.1467	0.2479	0.1061	0.214	0.4645	0.1069	0.6909	0.3012	0.1818	0.2718	0.3034	0.3347	0.3441	0.3011	0.1486	0.3147	0.114	0.439	0.3995	0.0052	0.4419	0.3148	0.1208	0.2327	1.0551
-3.9333	0.3823	0.3363	0.2616	0.1261	0.5561	0.3025	0.207	0.4623	0.0656	0.4466	0.6968	0.3549	0.6242	0.6588	0.6249	0.4546	0.8914	0.6082	0.5987	0.7484	0.6855	0.4309	0.3622	0.0524	0.1395	0.2403	0.0853	0.071	0.4479	0.0724	0.6711	0.254	0.2541	0.247	0.3342	0.4341	0.3684	0.3507	0.0637	0.2851	0.0969	0.3744	0.3602	0.0945	0.4496	0.2681	0.1357	0.2446	1.0945
-3.9	0.3994	0.1513	0.3337	0.2262	0.5615	0.302	0.1916	0.4466	0.0992	0.473	0.6204	0.3516	0.6632	0.6506	0.6591	0.4294	0.8596	0.5539	0.2023	0.724	0.8131	0.4256	0.372	0.0476	0.1474	0.2394	0.1431	0.1262	0.4558	0.0526	0.6241	0.3052	0.1996	0.2997	0.338	0.4513	0.3834	0.3571	0.1001	0.3097	0.1041	0.3867	0.331	0.1473	0.4572	0.2472	0.136	0.2983	1.1204
-3.8667	0.4095	0.15	0.3642	0.378	0.537	0.3228	0.173	0.4257	0.1734	0.5195	0.7279	0.3429	0.6329	0.6441	0.5772	0.387	0.8784	0.5287	0.1069	0.9089	0.6212	0.3945	0.5001	0.0549	0.187	0.2202	0.1492	0.152	0.4905	0.03	0.5516	0.323	0.1842	0.3312	0.3226	0.4345	0.4084	0.3345	0.0971	0.3381	0.1036	0.3789	0.3791	0.1636	0.4732	0.2674	0.1406	0.3324	1.1269
-3.8333	0.3898	0.0883	0.267	0.1656	0.5701	0.3241	0.1961	0.4595	0.1577	0.4917	0.6548	0.2752	0.6354	0.5945	0.5177	0.3782	0.9483	0.5676	0.109	0.6656	0.6035	0.5295	0.5056	0.0562	0.2085	0.2871	0.122	0.1594	0.533	0.0393	0.6014	0.2877	0.1781	0.2957	0.313	0.3884	0.41	0.4142	0.079	0.2743	0.1231	0.3615	0.3399	0.1684	0.4439	0.3119	0.2009	0.3447	1.1471
-3.8	0.3762	0.0536	0.2664	0.1099	0.4969	0.2256	0.182	0.5186	0.1567	0.4968	0.8049	0.3552	0.7149	0.6735	0.4578	0.3117	0.8585	0.5545	0.0796	0.5743	0.5687	0.3939	0.5632	0.0132	0.4136	0.2139	0.1636	0.2466	0.5616	0.0397	0.527	0.3684	0.1553	0.3232	0.3358	0.3687	0.4061	0.4554	0.0824	0.2385	0.1237	0.3686	0.3688	0.1782	0.45	0.3309	0.2074	0.3836	1.1208
-3.7667	0.3599	0.1284	0.344	0.1631	0.4883	0.2756	0.1541	0.4278	0.1648	0.5429	0.8692	0.4168	0.7617	0.5932	0.5048	0.3273	0.7855	0.5851	0.1253	0.466	0.6313	0.4073	0.5212	-0.0159	0.1906	0.1994	0.1049	0.1967	0.5519	0.0399	0.5403	0.4275	0.2284	0.3752	0.4207	0.4054	0.4361	0.3767	0.0746	0.267	0.1235	0.4549	0.3389	0.1507	0.4057	0.259	0.196	0.4621	1.0208
-3.7333	0.3732	0.0185	0.3921	0.2433	0.5003	0.2182	0.1776	0.4535	0.1125	0.5173	0.8552	0.4324	0.8271	0.6002	0.5752	0.4098	0.7727	0.5148	0.1532	0.4358	0.5754	0.4363	0.3805	-0.0103	0.1581	0.2277	0.035	0.2403	0.3839	0.0239	0.5208	0.3775	0.251	0.4298	0.3923	0.3317	0.44	0.3785	0.1236	0.2751	0.1122	0.4738	0.2951	0.1181	0.3795	0.2706	0.1553	0.4567	1.1732
-3.7	0.2908	0.1764	0.3957	0.2177	0.4557	0.2097	0.1705	0.4601	0.0745	0.5002	0.8148	0.401	0.7933	0.6179	0.5526	0.4261	0.7047	0.4925	0.2374	0.4536	0.5242	0.4251	0.3022	0.0019	0.135	0.1973	0.054	0.1962	0.3845	0.0128	0.5092	0.4164	0.2803	0.4035	0.4012	0.377	0.4394	0.3047	0.1772	0.2476	0.0617	0.4892	0.2742	0.1325	0.3796	0.2215	0.1562	0.4808	1.228
-3.6667	0.2603	0.1143	0.3284	0.2391	0.4827	0.2231	0.1646	0.4336	0.0891	0.4828	0.6938	0.4533	0.777	0.7144	0.5985	0.4487	0.6449	0.4846	0.1812	0.5462	0.5184	0.4431	0.2998	0.0175	0.144	0.1974	0.047	0.1949	0.3398	0.0021	0.5266	0.5241	0.2801	0.3991	0.3749	0.3868	0.4542	0.3453	0.1929	0.2422	0.1132	0.4942	0.3351	0.1459	0.3862	0.1878	0.202	0.5006	1.1942
-3.6333	0.2759	0.0905	0.2653	0.2037	0.513	0.2574	0.202	0.3992	0.113	0.4554	0.5175	0.439	0.7551	0.6793	0.6152	0.4604	0.5809	0.4689	0.2458	0.6458	0.5105	0.6106	0.3349	0.0065	0.1762	0.1244	0.0457	0.1644	0.3711	0.0661	0.5719	0.476	0.3315	0.3196	0.3878	0.5147	0.4833	0.325	0.1475	0.2072	0.1295	0.5308	0.3473	0.2073	0.377	0.2401	0.199	0.4508	1.1951
-3.6	0.2293	0.1144	0.1412	0.1743	0.4376	0.325	0.283	0.3672	0.0966	0.3535	0.4352	0.3601	0.7313	0.6484	0.6087	0.4299	0.5185	0.5345	0.2764	0.7313	0.553	0.6184	0.4366	0.0114	0.2385	0.0362	0.1002	0.2184	0.3482	0.0599	0.6375	0.4907	0.4243	0.3341	0.3755	0.5557	0.5303	0.4004	0.1974	0.1612	0.1465	0.4347	0.3554	0.2158	0.3659	0.2542	0.2835	0.3738	1.2692
-3.5667	0.2029	0.1229	0.1506	0.1664	0.4009	0.404	0.1604	0.2952	0.1059	0.3558	0.4607	0.3164	0.7483	0.7013	0.6075	0.3825	0.5707	0.5094	0.2031	0.6944	0.4975	0.6249	0.5248	0.0063	0.132	0.0422	0.0955	0.2478	0.4382	0.0832	0.6131	0.5754	0.3239	0.3667	0.4179	0.5544	0.5092	0.2953	0.1791	0.215	0.1287	0.4212	0.356	0.2706	0.3444	0.2109	0.2646	0.4316	1.2199
-3.5333	0.1708	0.2317	0.137	0.1646	0.3935	0.3893	0.1664	0.2572	0.1347	0.3948	0.4039	0.3918	0.7893	0.683	0.6571	0.407	0.5621	0.5221	0.3086	0.7019	0.5562	0.6939	0.567	0.0475	0.1458	0.0659	0.2686	0.1698	0.3715	0.1062	0.6377	0.5113	0.38	0.3386	0.4236	0.506	0.5295	0.2916	0.1937	0.1623	0.0948	0.4216	0.4031	0.2626	0.3655	0.2266	0.3145	0.5265	1.2543
-3.5	0.1175	0.1385	0.1196	0.1603	0.428	0.3671	0.1412	0.3372	0.1686	0.4262	0.3186	0.4402	0.7864	0.5851	0.6657	0.4297	0.5856	0.6518	0.5807	0.6568	0.4228	0.9314	0.5259	0.1574	0.1334	0.0802	0.2118	0.1191	0.2622	0.1378	0.6247	0.5772	0.3033	0.3738	0.4185	0.4276	0.5073	0.348	0.1777	0.1344	0.0767	0.496	0.3862	0.274	0.3197	0.1468	0.3103	0.5116	1.3811
-3.4667	0.052	0.1511	0.1516	0.1429	0.4768	0.3817	0.139	0.314	0.1715	0.2895	0.3909	0.3466	0.7656	0.5798	0.7379	0.3708	0.6253	0.6101	0.455	0.6319	0.5107	0.699	0.4285	0.1229	0.1609	0.1191	0.0552	0.1382	0.3129	0.1065	0.6629	0.5591	0.2612	0.4258	0.398	0.2831	0.4766	0.393	0.1773	0.1988	0.1015	0.4824	0.3612	0.2514	0.3677	0.169	0.3012	0.5189	1.1785
-3.4333	0.1285	0.1545	0.1746	0.1542	0.5402	0.4564	0.1736	0.3748	0.1337	0.3976	0.4506	0.2331	0.7238	0.592	0.6812	0.3716	0.6578	0.5315	0.3407	0.6128	0.5383	0.7131	0.4014	0.0347	0.151	0.1639	0.0095	0.1538	0.4785	0.062	0.6311	0.632	0.3189	0.431	0.4052	0.4235	0.437	0.3913	0.1863	0.2978	0.1228	0.4738	0.4259	0.1952	0.305	0.1639	0.2765	0.4513	1.0817
-3.4	0.2078	0.1539	0.221	0.1438	0.5849	0.3828	0.2259	0.3643	0.1321	0.4345	0.4268	0.2272	0.7218	0.6976	0.7108	0.414	0.7502	0.5088	0.4572	0.584	0.4918	0.6165	0.2677	0.0062	0.1985	0.1475	0.0372	0.1687	0.3944	0.0735	0.6081	0.6798	0.3688	0.45	0.3809	0.4528	0.447	0.4193	0.2135	0.3899	0.1568	0.4978	0.4892	0.2581	0.289	0.1821	0.3475	0.4488	1.0105
-3.3667	0.2597	0.1674	0.3995	0.1567	0.586	0.3455	0.2244	0.3727	0.1545	0.4478	0.5424	0.2481	0.6428	0.674	0.6902	0.4215	0.7958	0.4529	0.5088	0.5329	0.4877	0.6692	0.3625	-0.0059	0.2552	0.1444	-0.0596	0.1389	0.3835	0.0486	0.6313	0.6949	0.4338	0.4203	0.366	0.3754	0.4583	0.4192	0.1926	0.2874	0.1587	0.4462	0.4027	0.2929	0.2861	0.2077	0.3102	0.3633	0.977
-3.3333	0.3156	0.1192	0.4396	0.1805	0.4225	0.3202	0.216	0.3464	0.1914	0.5013	0.532	0.3125	0.6464	0.6878	0.6341	0.405	0.8068	0.4149	0.5092	0.5007	0.4758	0.8621	0.4202	0.0489	0.2858	0.1841	0.0266	0.0148	0.3952	0.0714	0.5993	0.6706	0.3639	0.3849	0.3089	0.3649	0.4279	0.4131	0.1605	0.2811	0.2089	0.4872	0.3532	0.4724	0.3396	0.1876	0.3106	0.4021	0.9641
-3.3	0.2851	0.1372	0.4283	0.1734	0.4174	0.3205	0.2026	0.3234	0.1539	0.5063	0.4805	0.284	0.6888	0.6171	0.5976	0.2986	0.8388	0.3649	0.4367	0.5471	0.5969	0.6048	0.438	0.1092	0.2208	0.2256	0.1808	0.1574	0.415	0.0612	0.523	0.8279	0.3948	0.4569	0.3649	0.3677	0.3918	0.3709	0.1861	0.2831	0.2196	0.5165	0.4278	0.2411	0.3421	0.1574	0.3867	0.4077	0.9193
-3.2667	0.3266	0.1602	0.8256	0.2548	0.3155	0.2736	0.184	0.3226	0.1672	0.4196	0.5968	0.2856	0.6791	0.5688	0.5277	0.2801	0.807	0.3151	0.5305	0.5636	0.5957	0.4942	0.4434	0.0865	0.2251	0.2056	0.1211	0.1888	0.3952	0.07	0.482	0.6677	0.3818	0.4488	0.3586	0.413	0.4069	0.3836	0.1739	0.344	0.1991	0.5631	0.417	0.1698	0.3398	0.0921	0.3993	0.3587	1.0066
-3.2333	0.2868	0.1563	0.9704	0.1744	0.2902	0.3045	0.175	0.3298	0.1727	0.4629	0.6259	0.321	0.6723	0.5822	0.5486	0.3266	0.856	0.3183	0.5598	0.5478	0.6816	0.5264	0.4605	0.0835	0.214	0.2475	0.0933	0.2299	0.3704	0.0832	0.4783	0.5941	0.3352	0.4395	0.3789	0.4814	0.4019	0.381	0.1271	0.3959	0.2001	0.6192	0.4588	0.1494	0.3722	0.233	0.3631	0.3961	0.9646
-3.2	0.3351	0.1501	0.3269	0.2516	0.3524	0.2794	0.1619	0.2924	0.1928	0.4521	0.5847	0.3213	0.7943	0.584	0.5629	0.2619	0.8944	0.3241	0.6498	0.5517	0.6953	0.4724	0.4558	0.0701	0.1067	0.2138	0.0236	0.2656	0.2296	0.0558	0.536	0.6237	0.3382	0.4472	0.4077	0.4891	0.4109	0.3653	0.0928	0.4436	0.1939	0.5761	0.453	0.1603	0.2567	0.3099	0.358	0.2471	0.92
-3.1667	0.2705	0.1369	-0.4124	0.2469	0.3367	0.3035	0.2261	0.3043	0.1745	0.456	0.5899	0.2989	0.8402	0.6412	0.5723	0.257	0.9828	0.3653	0.4778	0.5553	0.6454	0.4969	0.3898	0.0785	0.1213	0.204	0.049	0.0642	0.2469	0.0583	0.5195	0.5557	0.3087	0.3644	0.3706	0.4782	0.4292	0.3806	0.0954	0.449	0.2125	0.5909	0.4488	0.1358	0.2081	0.3337	0.2784	0.1715	0.9241
-3.1333	0.2158	0.1675	0.0296	0.2636	0.3163	0.3338	0.1268	0.2996	0.1991	0.5094	0.5243	0.2379	0.8686	0.6309	0.5701	0.2617	0.9506	0.2786	0.4589	0.4583	0.701	0.4832	0.3575	0.1093	0.1491	0.2095	0.0762	0.0646	0.268	0.0493	0.6083	0.5902	0.3083	0.3593	0.395	0.4587	0.4268	0.4147	0.0949	0.4406	0.2262	0.5396	0.461	0.1893	0.2291	0.3211	0.2729	0.1969	0.8729
-3.1	0.3285	0.1301	0.3698	0.2488	0.339	0.2482	0.1201	0.3327	0.2216	0.5639	0.4539	0.3466	0.898	0.6712	0.5333	0.2782	0.9321	0.2927	0.3673	0.4929	0.6809	0.5105	0.3165	0.0943	0.1516	0.194	0.0758	0.0301	0.3467	0.0881	0.6086	0.4955	0.3298	0.3359	0.3743	0.4937	0.4477	0.3615	0.1038	0.3659	0.2119	0.5428	0.5242	0.333	0.2522	0.3986	0.274	0.2139	0.8723
-3.0667	0.2994	0.1524	0.3757	0.5574	0.4248	0.3412	0.0933	0.3537	0.2277	0.5102	0.5465	0.3768	0.8131	0.6258	0.6054	0.2954	0.9267	0.2318	0.4136	0.5371	0.6845	0.5233	0.2466	0.0893	0.1116	0.2032	0.095	0.1038	0.347	0.1291	0.6136	0.5571	0.3988	0.242	0.3596	0.5257	0.451	0.3279	0.1083	0.3367	0.1936	0.4465	0.5663	0.1235	0.2743	0.4252	0.3299	0.2367	0.86
-3.0333	0.245	0.1477	0.3973	0.1686	0.49	0.3668	0.1399	0.2572	0.2028	0.4812	0.4883	0.3645	0.9659	0.774	0.6577	0.2536	1.0844	0.297	0.4949	0.617	0.7793	0.5199	0.1122	0.0972	0.1246	0.4307	0.0706	0.1664	0.479	0.0963	0.5764	0.5856	0.3925	0.1626	0.3369	0.5305	0.4442	0.3328	0.0963	0.3186	0.2	0.4059	0.5709	0.1509	0.3103	0.3524	0.3202	0.2769	0.893
-3	0.2117	0.1682	0.2955	0.1069	0.5227	0.385	0.1689	0.2825	0.1808	0.4717	0.5735	0.2993	0.9436	0.7315	0.6217	0.2625	1.0494	0.3656	0.7136	0.5755	0.665	0.6159	0.1144	0.1446	0.1527	0.2936	0.0418	0.1416	0.4583	0.0349	0.5275	0.6203	0.3946	0.2032	0.3403	0.5075	0.4729	0.2925	0.0978	0.3395	0.201	0.456	0.5054	0.3148	0.2967	0.3313	0.3322	0.2423	0.8414
-2.9667	0.2876	0.1692	0.2712	0.001	0.5029	0.3911	0.154	0.3064	0.1296	0.4448	0.5858	0.2943	0.9139	0.7019	0.6209	0.291	0.8906	0.3944	0.4776	0.7688	0.6389	0.5124	0.1589	0.2201	0.1626	0.2398	0.0396	0.1584	0.4627	0.021	0.5735	0.5919	0.3592	0.236	0.3113	0.4839	0.4728	0.2378	0.0861	0.4536	0.2442	0.4677	0.4794	0.1429	0.2784	0.345	0.377	0.2206	0.793
-2.9333	0.374	0.2164	0.2335	0.0325	0.5261	0.3766	0.1338	0.2647	0.1507	0.5053	0.4409	0.2936	0.8649	0.7481	0.6438	0.3294	0.749	0.435	0.323	0.7567	0.6748	0.4706	0.3757	0.1425	0.2381	0.2188	0.0404	0.1807	0.4263	0.0829	0.5333	0.6046	0.3405	0.1257	0.2852	0.5038	0.4689	0.2342	0.085	0.3951	0.2456	0.5259	0.4759	0.1684	0.2521	0.2971	0.4069	0.2303	0.8631
-2.9	0.3789	0.1631	0.2583	0.0634	0.628	0.3692	0.0789	0.3196	0.1456	0.5048	0.4611	0.3252	0.6885	0.7567	0.6686	0.4773	0.8303	0.4798	0.3734	0.7061	0.568	0.4567	0.4663	0.1504	0.2444	0.2292	0.0491	0.1818	0.5582	0.1105	0.5422	0.5876	0.3888	0.3143	0.3286	0.5279	0.4599	0.2355	0.0872	0.3768	0.2992	0.4092	0.5791	0.2702	0.2944	0.3269	0.3554	0.2755	0.9645
-2.8667	0.3574	0.1773	0.2472	0.1256	0.6661	0.3249	0.0613	0.3472	0.1306	0.4734	0.4778	0.3773	0.5982	0.8292	0.656	0.4808	0.8439	0.4531	0.2322	0.6121	0.4791	0.4652	0.4136	0.1881	0.2074	0.1488	0.0423	0.1542	0.6063	0.0794	0.5356	0.6446	0.3132	0.4043	0.3396	0.531	0.4414	0.231	0.1162	0.2537	0.2375	0.4076	0.6206	0.4348	0.316	0.3779	0.4425	0.3094	1.0945
-2.8333	0.2828	0.0848	0.3189	0.1466	0.6577	0.3364	0.1154	0.46	0.1172	0.4817	0.5264	0.3773	0.6753	0.925	0.5237	0.3808	0.8358	0.3763	0.275	0.5699	0.3378	0.4805	0.3569	0.1768	0.2019	0.1153	0.06	0.1739	0.6263	0.1598	0.5115	0.5958	0.3039	0.4188	0.3441	0.5113	0.4727	0.256	0.1333	0.2517	0.1717	0.4449	0.5163	0.2977	0.2871	0.5745	0.4109	0.2597	1.0854
-2.8	0.2104	0.0931	0.3797	0.1699	0.6223	0.3638	0.2239	0.6485	0.1685	0.5095	0.7283	0.4801	0.6781	0.8251	0.544	0.4149	0.7797	0.3897	0.2856	0.6229	0.3382	0.511	0.3885	0.1703	0.1429	0.114	0.0932	0.1964	0.6338	0.1449	0.5507	0.5212	0.2674	0.3785	0.3631	0.5195	0.431	0.2614	0.1306	0.2076	0.1533	0.522	0.4863	0.216	0.288	0.3999	0.4281	0.2839	1.1341
-2.7667	0.2051	0.0998	0.4399	0.1802	0.6122	0.2558	0.2769	0.5153	0.2142	0.5297	0.727	0.4683	0.7396	0.78	0.6557	0.3964	0.7249	0.4388	0.7046	0.6035	0.3316	0.5672	0.403	0.1768	0.1051	0.1049	0.1201	0.198	0.6098	0.0898	0.5803	0.4753	0.1181	0.4721	0.401	0.4495	0.4159	0.2579	0.1479	0.16	0.1143	0.4381	0.4017	0.1214	0.3234	0.3979	0.4371	0.2477	1.0387
-2.7333	0.1678	0.117	0.4807	0.1788	0.6029	0.2735	0.075	0.3344	0.2306	0.5899	0.766	0.4929	0.7983	0.7357	0.6874	0.382	0.6401	0.4897	0.3047	0.6627	0.2615	0.5487	0.3594	0.2029	0.1546	0.1079	0.103	0.1753	0.6061	0.1374	0.6398	0.4235	0.2394	0.4699	0.3762	0.4865	0.414	0.2651	0.1337	0.1631	0.1512	0.4551	0.4498	0.2181	0.3035	0.3163	0.3758	0.2446	0.9701
-2.7	0.1683	0.0707	0.4809	0.1405	0.5649	0.2527	0.0674	0.3349	0.2493	0.5695	0.7166	0.4168	0.711	0.6511	0.5562	0.3867	0.6864	0.4109	0.5524	0.6715	0.2964	0.5017	0.4418	0.2017	0.1686	0.1638	0.1221	0.1567	0.5925	0.1688	0.6239	0.5364	0.2616	0.3677	0.4248	0.4699	0.4106	0.2832	0.097	0.1729	0.2361	0.3521	0.414	0.2178	0.3494	0.3261	0.3492	0.2481	0.8564
-2.6667	0.2815	0.1314	0.4165	0.0982	0.5533	0.1993	0.0963	0.2764	0.2962	0.509	0.4712	0.4656	0.7368	0.6139	0.4934	0.4053	0.7739	0.3922	0.5234	0.6974	0.6182	0.4616	0.4193	0.24	0.2021	0.1391	0.1654	0.1249	0.5579	0.3132	0.6778	0.5376	0.2893	0.3581	0.4344	0.4828	0.4528	0.2535	0.1256	0.2158	0.2426	0.447	0.4316	0.2078	0.3105	0.4656	0.4177	0.2647	0.8611
-2.6333	0.3581	0.1145	0.4382	0.1246	0.5426	0.2233	0.1181	0.2887	0.2809	0.4655	0.5082	0.4788	0.7404	0.5664	0.6897	0.4082	0.834	0.439	0.6157	0.6119	0.5222	0.4138	0.372	0.2063	0.1887	0.0741	0.2078	0.0839	0.5173	0.1509	0.6761	0.561	0.3238	0.3312	0.383	0.5543	0.4464	0.2719	0.1313	0.2314	0.1946	0.5825	0.3853	0.1791	0.3067	0.2669	0.3587	0.2905	0.8481
-2.6	0.4176	0.115	0.4514	0.0944	0.6043	0.2178	0.0965	0.2791	0.1949	0.451	0.5678	0.4642	0.8502	0.629	0.7811	0.3778	0.8408	0.4364	0.5267	0.5193	0.3676	0.4557	0.4366	0.1489	0.1954	0.216	0.2595	0.0686	0.5144	0.0352	0.6886	0.5796	0.2067	0.3542	0.3303	0.599	0.4248	0.295	0.1322	0.2234	0.1706	0.6124	0.3816	0.1134	0.3988	0.2178	0.304	0.3097	0.7085
-2.5667	0.4202	0.1296	0.4249	0.0859	0.5882	0.2249	0.1287	0.3257	0.2087	0.413	0.6717	0.4729	0.7023	0.6412	0.7652	0.4107	0.79	0.4089	0.6567	0.4524	0.4312	0.6287	0.3582	0.1192	0.1756	0.1677	0.3095	0.0799	0.519	0.0382	0.6995	0.5785	0.3038	0.425	0.2971	0.6336	0.4026	0.3116	0.1623	0.2141	0.136	0.4694	0.3634	0.0692	0.4286	0.1906	0.2928	0.2955	0.74
-2.5333	0.442	0.1489	0.4318	0.122	0.6585	0.2407	0.1545	0.3606	0.2024	0.3941	0.7704	0.5647	0.7953	0.599	0.7831	0.4666	0.9026	0.4305	0.5148	0.5472	0.4483	0.7124	0.3843	0.1098	0.1973	0.1807	0.234	0.0732	0.391	0.0264	0.7024	0.6369	0.3744	0.5076	0.2671	0.5689	0.3853	0.249	0.1795	0.2353	0.1494	0.4862	0.3925	0.0967	0.4794	0.1519	0.233	0.4053	0.8195
-2.5	0.418	0.1377	0.4081	0.1114	0.7435	0.2155	0.1399	0.3549	0.2149	0.3476	0.7657	0.5655	0.7105	0.6948	0.723	0.5163	1.0134	0.4067	0.3942	0.508	0.3566	0.7914	0.3724	0.1147	0.1645	0.2419	0.1275	0.1065	0.4216	0.065	0.647	0.6446	0.3345	0.4736	0.3114	0.5894	0.4326	0.2586	0.1641	0.2305	0.2125	0.428	0.3883	0.1198	0.5117	0.2522	0.231	0.4449	0.9079
-2.4667	0.3647	0.1799	0.341	0.195	0.6213	0.2088	0.1616	0.347	0.2055	0.2774	0.8983	0.5191	0.8381	0.6525	0.7509	0.4802	1.0216	0.3787	0.4177	0.4228	0.3231	0.8485	0.5321	0.107	0.2034	0.2284	0.0085	0.1207	0.4234	0.1303	0.6192	0.6359	0.302	0.4194	0.3197	0.5492	0.3648	0.2267	0.1583	0.2491	0.2328	0.446	0.3454	0.1411	0.4423	0.4634	0.2165	0.3782	0.9414
-2.4333	0.3249	0.1648	0.3474	0.2046	0.534	0.1877	0.266	0.3016	0.2107	0.3362	0.9197	0.6033	0.7127	0.6003	0.69	0.4893	0.846	0.5205	0.4165	0.386	0.2481	0.7856	0.4728	0.1174	0.2157	0.2007	0.0837	0.1218	0.3841	0.1499	0.4889	0.992	0.2746	0.3839	0.3353	0.5988	0.4089	0.262	0.2358	0.2189	0.203	0.4656	0.3256	0.1697	0.3381	0.44	0.2014	0.3681	0.9731
-2.4	0.3148	0.1955	0.3285	0.1751	0.5665	0.2043	0.2703	0.3283	0.1794	0.4567	0.8265	0.5488	0.7601	0.6994	0.4949	0.438	0.8312	0.5879	0.3032	0.3437	0.2013	0.7149	0.4435	0.1035	0.2089	0.2031	0.058	0.1103	0.3318	0.1563	0.574	0.8756	0.318	0.4774	0.3483	0.6709	0.4354	0.2735	0.2408	0.188	0.2042	0.5128	0.2422	0.1829	0.2866	0.3489	0.2129	0.3833	0.9482
-2.3667	0.265	0.1857	0.4378	0.2234	0.5446	0.2169	0.227	0.3108	0.1643	0.4171	0.794	0.6701	0.874	0.7044	0.477	0.4323	0.776	0.3844	0.2762	0.3124	0.2209	0.711	0.3278	0.1316	0.219	0.1551	0.0328	0.1415	0.3187	0.2656	0.616	0.8632	0.3184	0.4297	0.3508	0.7012	0.3937	0.2752	0.2269	0.1586	0.1268	0.5611	0.2821	0.1969	0.2449	0.3452	0.1891	0.3675	0.9872
-2.3333	0.2578	0.1804	0.335	0.2422	0.5863	0.2226	0.1969	0.291	0.1528	0.4229	0.7755	0.5738	0.8287	0.7624	0.493	0.4551	0.9337	0.4109	0.4101	0.3737	0.3026	0.6286	0.2975	0.1546	0.2218	0.1409	0.0186	0.1955	0.3188	0.0356	0.5644	0.748	0.2895	0.4473	0.382	0.7483	0.4186	0.3099	0.1762	0.1187	0.0796	0.5823	0.2895	0.1996	0.2566	0.3483	0.1156	0.3884	1.1835
-2.3	0.2457	0.2021	0.5673	0.2058	0.5448	0.2156	0.1588	0.3176	0.1495	0.364	0.872	0.6725	0.801	0.7508	0.5355	0.3839	1.0909	0.399	0.4805	0.3983	0.3226	0.5902	0.3119	0.1958	0.2601	0.2223	0.0148	0.2142	0.333	-0.0273	0.5527	0.7456	0.2425	0.49	0.4009	0.7423	0.3712	0.3158	0.2158	0.1167	0.1054	0.574	0.3434	0.274	0.2852	0.3444	0.1984	0.2995	1.2782
-2.2667	0.2444	0.2106	0.5191	0.2581	0.5467	0.2156	0.184	0.2821	0.1658	0.3078	0.6979	0.6331	0.6894	0.8917	0.5083	0.3508	0.7998	0.3964	0.421	0.3852	0.3562	0.6351	0.2227	0.145	0.2647	0.2171	0.0355	0.2509	0.3521	0.0011	0.5342	0.5925	0.3291	0.427	0.3918	0.7687	0.3552	0.3204	0.2283	0.2239	0.1351	0.576	0.3897	0.3162	0.2635	0.296	0.2135	0.3603	1.4008
-2.2333	0.283	0.202	0.2813	0.2824	0.482	0.2617	0.1685	0.2928	0.1409	0.3052	0.7928	0.6807	0.691	0.8231	0.4252	0.3363	0.7868	0.4371	0.2431	0.2948	0.4207	0.5401	0.2804	0.147	0.3284	0.2144	0.0322	0.2509	0.3362	0.0649	0.5175	0.6515	0.4021	0.479	0.4289	0.7012	0.3538	0.3054	0.2153	0.2074	0.1759	0.5254	0.3999	0.3392	0.2526	0.3272	0.2586	0.3736	1.4081
-2.2	0.2913	0.2018	0.2483	0.4933	0.4159	0.3315	0.179	0.3422	0.1507	0.2794	0.9153	0.6266	0.7127	0.7303	0.4557	0.3159	0.7876	0.4616	0.3233	0.2501	0.4176	0.5459	0.3047	0.1183	0.2961	0.1857	0.0759	0.1753	0.4049	0.0238	0.502	0.6213	0.3641	0.4345	0.3868	0.7234	0.3597	0.3045	0.2329	0.2256	0.1652	0.4766	0.4024	0.3458	0.2731	0.3362	0.2113	0.4484	1.4577
-2.1667	0.225	0.2067	0.3964	0.2308	0.3847	0.2482	0.1598	0.3324	0.1329	0.2751	0.8353	0.8579	0.72	0.8104	0.4744	0.3673	0.9243	0.3839	0.3881	0.2702	0.4196	0.4019	0.2695	0.0796	0.2671	0.1721	0.1024	0.2033	0.3696	0.2145	0.5887	0.5856	0.3745	0.4439	0.4008	0.6819	0.3768	0.3461	0.2014	0.2651	0.2065	0.5799	0.4874	0.3962	0.2776	0.3516	0.1815	0.4904	1.4382
-2.1333	0.2391	0.1551	0.3764	0.2372	0.3407	0.2439	0.1375	0.3719	0.1263	0.2283	0.867	0.7157	0.7501	0.7982	0.4401	0.4223	0.9761	0.4457	0.3847	0.2263	0.3512	0.3849	0.3734	0.0887	0.2497	0.1744	0.1005	0.1939	0.2817	0.213	0.5582	0.66	0.3623	0.4684	0.3928	0.7021	0.356	0.3181	0.2454	0.3045	0.1983	0.5896	0.4799	0.3837	0.3116	0.3689	0.2364	0.4508	1.1234
-2.1	0.202	0.2012	0.4395	0.2649	0.3773	0.2408	0.1307	0.2711	0.1197	0.2055	0.7447	0.7974	0.7127	0.815	0.3375	0.4431	0.8169	0.3651	0.3072	0.1998	0.4525	0.4329	0.4557	0.1208	0.2524	0.1406	0.1066	0.2446	0.3611	0.251	0.5453	0.6537	0.3471	0.5921	0.4198	0.6296	0.3571	0.3034	0.2752	0.3651	0.1108	0.6829	0.5424	0.4182	0.3189	0.2986	0.2555	0.5036	1.1038
-2.0667	0.2012	0.1672	0.4037	0.2118	0.4307	0.2239	0.1298	0.2747	0.1104	0.2633	0.7073	0.7611	0.7486	0.8383	0.3487	0.4679	0.7472	0.3991	0.2779	0.1841	0.4923	0.4785	0.3868	0.1194	0.2617	0.1194	0.1581	0.1561	0.308	0.2588	0.5927	0.7326	0.3732	0.663	0.4119	0.611	0.4043	0.2764	0.3238	0.3398	0.1373	0.6571	0.5779	0.3666	0.3401	0.455	0.2954	0.4689	1.1451
-2.0333	0.2151	0.2187	0.3767	0.2326	0.3732	0.2394	0.1545	0.2485	0.1629	0.3042	0.579	0.747	0.8279	0.9307	0.374	0.5073	0.6653	0.4436	0.3175	0.1777	0.5572	0.4758	0.3718	0.1202	0.2024	0.1475	0.1504	0.0504	0.334	0.1848	0.5958	0.7023	0.4027	0.6763	0.3868	0.6038	0.3601	0.2913	0.2865	0.3273	0.2317	0.663	0.48	0.3627	0.4032	0.5217	0.3772	0.4641	1.0328
-2	0.2449	0.2631	0.4023	0.1308	0.3584	0.2207	0.0963	0.2433	0.214	0.3545	0.531	0.7728	0.7519	0.8439	0.3778	0.5023	0.7479	0.4414	0.5059	0.2042	0.5156	0.5263	0.4032	0.1036	0.189	0.1565	0.1548	0.0754	0.3586	0.1882	0.5961	0.7396	0.4314	0.6971	0.4417	0.5449	0.2922	0.2911	0.2308	0.317	0.2061	0.5854	0.4857	0.3785	0.4357	0.4314	0.204	0.4564	1.0262
-1.9667	0.2598	0.1903	0.3954	0.0681	0.4311	0.2363	0.1232	0.3366	0.1712	0.4223	0.5777	0.6206	0.7605	0.9445	0.4737	0.5167	0.8253	0.4265	0.6054	0.1774	0.4977	0.5857	0.6313	0.0977	0.2284	0.1772	0.16	0.2085	0.3547	0.13	0.6627	0.7455	0.4027	0.5398	0.4638	0.5134	0.3004	0.2691	0.2129	0.3066	0.2862	0.5052	0.483	0.3772	0.4437	0.3489	0.1854	0.4025	1.0411
-1.9333	0.219	0.2708	0.356	0.0894	0.4715	0.2276	0.1451	0.3531	0.1004	0.277	0.6187	0.515	0.8165	0.8824	0.5138	0.5296	0.7657	0.3045	0.6268	0.2669	0.5675	0.5464	0.5043	0.0718	0.3436	0.2026	0.1769	0.2208	0.2877	0.1309	0.7073	0.6558	0.3759	0.5378	0.4112	0.547	0.3181	0.2913	0.1844	0.3789	0.1863	0.4295	0.4941	0.3717	0.4172	0.3206	0.2063	0.4089	1.0644
-1.9	0.1746	0.2109	0.2782	0.1035	0.5073	0.2234	0.1722	0.3892	0.1443	0.318	0.651	0.5285	0.911	0.81	0.5175	0.5541	0.8105	0.3591	0.532	0.2859	0.5985	0.5629	0.3953	0.0717	0.3497	0.1554	0.1535	0.171	0.2838	0.1449	0.7338	0.6389	0.4889	0.6147	0.4571	0.51	0.352	0.2679	0.1256	0.3508	0.1123	0.4732	0.5174	0.3776	0.3798	0.2988	0.2469	0.3904	1.0711
-1.8667	0.1625	0.1577	0.2875	0.042	0.4678	0.242	0.1542	0.3677	0.2176	0.3416	0.6025	0.551	0.9601	0.8979	0.4421	0.538	0.8345	0.3376	0.6043	0.2958	0.6536	0.6111	0.3351	0.0422	0.2689	0.2025	0.1974	0.1816	0.2599	0.1896	0.7795	0.6401	0.5585	0.6713	0.4707	0.4796	0.3524	0.2931	0.1267	0.3011	0.1223	0.508	0.591	0.3168	0.3825	0.3204	0.228	0.4063	0.9677
-1.8333	0.1303	0.1384	0.4274	0.052	0.4641	0.318	0.1178	0.3375	0.151	0.3385	0.7538	0.6029	0.988	0.8846	0.3903	0.5058	0.8229	0.3647	0.5121	0.4194	0.6422	0.6172	0.3015	0.042	0.2435	0.2185	0.325	0.1457	0.3658	0.1474	0.6701	0.6798	0.5282	0.6154	0.4314	0.4422	0.3413	0.2746	0.1638	0.2278	0.1863	0.4918	0.5674	0.2698	0.3647	0.4278	0.1691	0.3837	0.9429
-1.8	0.1491	0.1734	0.2836	0.0885	0.5083	0.2551	0.098	0.3746	0.1359	0.3117	0.8251	0.5992	0.9413	0.8477	0.3679	0.5106	0.9146	0.4252	0.5064	0.4318	0.712	0.6374	0.3639	0.0632	0.2122	0.2594	0.2256	0.1641	0.3061	0.1345	0.6978	0.8243	0.5222	0.6718	0.3971	0.4798	0.3404	0.3009	0.173	0.2784	0.137	0.5135	0.5089	0.292	0.3889	0.4445	0.1452	0.4282	0.912
-1.7667	0.2029	0.1986	0.3754	0.1487	0.5635	0.2636	0.0311	0.4044	0.1004	0.3262	0.8497	0.6449	0.8923	0.792	0.5305	0.5293	0.9628	0.4134	0.5743	0.5204	0.7004	0.6211	0.387	0.0896	0.2344	0.3001	0.2718	0.1637	0.2799	0.1446	0.6858	0.8514	0.5001	0.7206	0.4066	0.4984	0.3678	0.3138	0.1797	0.2664	0.1437	0.5002	0.5698	0.3428	0.3754	0.4135	0.2055	0.4675	0.7903
-1.7333	0.2084	0.1892	0.3241	0.0956	0.5407	0.1999	0.0035	0.4949	0.1454	0.4069	0.9765	0.5506	0.9318	0.7257	0.5904	0.4818	0.9217	0.3541	0.569	0.7835	0.7146	0.5774	0.4115	0.0812	0.2468	0.3128	0.2945	0.1696	0.2083	0.0939	0.7399	0.8805	0.439	0.7421	0.4089	0.5761	0.388	0.2644	0.2566	0.3131	0.1602	0.4602	0.5919	0.2623	0.3842	0.3461	0.1432	0.443	0.8881
-1.7	0.2122	0.1024	0.3606	0.1223	0.5708	0.1541	0.0038	0.4989	0.1579	0.431	0.8513	0.5114	0.9169	0.7116	0.5522	0.4478	0.9444	0.3815	0.5526	0.6275	0.737	0.5285	0.307	0.0702	0.2463	0.3342	0.2739	0.1788	0.1984	0.0932	0.7834	0.9201	0.4878	0.7011	0.4273	0.6175	0.4257	0.2415	0.2664	0.2825	0.1309	0.4296	0.603	0.2185	0.3923	0.4161	0.1047	0.3952	1.0234
-1.66667	0.2741	0.1457	0.2834	0.0642	0.5673	0.1266	0.2202	0.4547	0.1512	0.5739	0.8229	0.6042	0.9915	0.6761	0.44	0.4356	0.9296	0.3908	0.421	0.4701	0.7114	0.5841	0.3118	0.0539	0.2308	0.3145	0.2519	0.2413	0.3107	0.0881	0.7349	0.8004	0.4191	0.5942	0.4241	0.619	0.4228	0.2222	0.3146	0.345	0.1469	0.4366	0.6058	0.1645	0.4042	0.4249	0.1077	0.3644	1.066
-1.63333	0.2858	0.1722	0.2245	0.1005	0.4866	0.2427	0.0524	0.4215	0.1521	0.3539	0.7779	0.6402	0.929	0.6545	0.5007	0.4333	0.7634	0.3477	0.5244	0.5748	0.7894	0.5674	0.3355	0.0493	0.2172	0.3036	0.2625	0.2045	0.3474	0.1258	0.7354	0.8586	0.4935	0.6231	0.3772	0.5913	0.4598	0.2352	0.3427	0.2773	0.1062	0.3217	0.596	0.1508	0.3881	0.4292	0.0975	0.3643	1.0233
-1.6	0.2939	0.1569	0.2191	0.1164	0.6219	0.2888	0.0089	0.3963	0.1569	0.3668	0.6755	0.6184	1.0097	0.6839	0.4812	0.4286	0.874	0.3996	0.4949	0.5454	0.8103	0.5797	0.3421	0.0585	0.2476	0.347	0.2445	0.2715	0.3678	0.0847	0.701	0.9744	0.4163	0.5748	0.4079	0.6036	0.4341	0.2325	0.3199	0.3877	0.107	0.3871	0.5146	0.138	0.4033	0.3444	0.0758	0.3909	0.8946
-1.56667	0.2531	0.1598	0.2471	0.1905	0.5658	0.2688	0.018	0.4459	0.1515	0.499	0.5796	0.6155	0.9702	0.67	0.5634	0.501	1.0224	0.4512	0.5262	0.4576	0.8273	0.6191	0.4191	0.0821	0.2469	0.3713	0.253	0.31	0.4755	0.1241	0.585	0.8931	0.4004	0.5091	0.433	0.6787	0.4024	0.2479	0.2703	0.2975	0.0791	0.3855	0.5895	0.151	0.4113	0.3539	0.092	0.3888	0.9168
-1.53333	0.2863	0.2107	0.2548	0.1825	0.464	0.2778	0.0431	0.421	0.1192	0.5248	0.6239	0.5494	0.8651	0.7656	0.5746	0.4749	0.7906	0.5011	0.4124	0.4346	0.8709	0.6079	0.4021	0.1348	0.2014	0.3173	0.2436	0.2915	0.3746	0.109	0.6348	0.8812	0.4927	0.4864	0.404	0.7082	0.3855	0.228	0.3343	0.2716	0.1026	0.4394	0.519	0.1751	0.3679	0.3305	0.1057	0.3795	0.918
-1.5	0.3679	0.2077	0.3027	0.1741	0.3897	0.3189	0.0564	0.4117	0.1025	0.5273	0.5652	0.5455	0.8656	0.7334	0.6181	0.5306	0.7669	0.4847	0.3625	0.3639	0.8445	0.6456	0.2804	0.1079	0.2033	0.3223	0.2172	0.3046	0.4309	0.1834	0.6152	0.9378	0.4402	0.5139	0.3874	0.7947	0.4016	0.2093	0.2962	0.2779	0.0929	0.5053	0.5433	0.2082	0.4321	0.27	0.1309	0.3527	0.9361
-1.46667	0.3771	0.1961	0.2597	0.18	0.3396	0.3148	0.0267	0.4566	0.1433	0.4533	0.7843	0.5301	0.9424	0.8089	0.6876	0.5575	0.8978	0.5241	0.3389	0.346	0.8713	0.6361	0.3601	0.0672	0.1869	0.3226	0.2429	0.2703	0.4585	0.3162	0.627	0.8975	0.3828	0.5654	0.3843	0.6981	0.3745	0.2184	0.2751	0.2354	0.0885	0.4663	0.5888	0.235	0.4004	0.2935	0.1382	0.3592	0.7823
-1.43333	0.3274	0.1972	0.3092	0.1541	0.3982	0.3455	-0.1527	0.4896	0.2784	0.3916	0.6518	0.4961	1.0614	0.8448	0.6827	0.5486	0.8107	0.4958	0.3304	0.3536	0.7535	0.7304	0.3861	0.1045	0.1812	0.3263	0.3128	0.2746	0.4621	0.144	0.6002	0.9188	0.4547	0.6253	0.3711	0.6127	0.4346	0.2049	0.28	0.3409	0.0815	0.5003	0.5703	0.2129	0.3561	0.384	0.1566	0.3425	0.7865
-1.4	0.3044	0.2419	0.2323	0.2432	0.4016	0.249	0.0016	0.4298	0.2688	0.359	0.6522	0.4856	0.9535	0.8152	0.6761	0.5332	0.8485	0.5186	0.4726	0.3507	0.6857	0.6179	0.4561	0.0824	0.1777	0.352	0.2757	0.2838	0.575	0.1639	0.6634	0.8924	0.4005	0.5497	0.3122	0.5956	0.4203	0.2167	0.3134	0.3841	0.069	0.5966	0.6018	0.1976	0.3731	0.3272	0.2061	0.3286	0.8503
-1.36667	0.2056	0.2058	0.1887	0.2688	0.5135	0.2377	0.0694	0.3764	0.2886	0.404	0.7269	0.4784	0.8611	0.8162	0.6915	0.4363	1.0841	0.4791	0.5139	0.3717	0.6708	0.6807	0.309	0.1298	0.1569	0.3386	0.2937	0.285	0.4683	0.1996	0.6268	0.8787	0.2946	0.4885	0.3079	0.5603	0.4006	0.2296	0.3371	0.4233	0.0791	0.5951	0.5738	0.1921	0.3442	0.292	0.1966	0.3011	0.9437
-1.33333	0.2307	0.2268	0.1639	0.2264	0.511	0.2721	0.0747	0.4003	0.3632	0.4282	0.6126	0.3884	0.8855	0.819	0.7319	0.4311	0.8623	0.4076	0.5064	0.3391	0.7538	0.6234	0.2438	0.1977	0.1591	0.3096	0.3643	0.2908	0.5193	0.2739	0.5599	0.825	0.3209	0.481	0.2999	0.4738	0.405	0.2102	0.2878	0.4438	0.0651	0.5854	0.6698	0.2339	0.3046	0.323	0.1955	0.2833	0.9104
-1.3	0.2512	0.1881	0.1493	0.2094	0.5097	0.2822	0.2459	0.306	0.3133	0.4182	0.4831	0.4374	0.8196	0.743	0.7535	0.4352	0.9385	0.4363	0.5036	0.296	0.7443	0.7089	0.1701	0.0805	0.1663	0.3078	0.3503	0.3071	0.5825	0.3557	0.5855	0.8665	0.4108	0.4963	0.3406	0.5243	0.4092	0.1985	0.2325	0.4373	0.0667	0.5327	0.6208	0.23	0.2906	0.2669	0.2087	0.2692	0.8904
-1.26667	0.2434	0.2025	0.1521	0.2687	0.5454	0.2675	0.4521	0.3617	0.2636	0.4614	0.432	0.4078	0.8589	0.769	0.684	0.4116	1.1395	0.4896	0.476	0.32	0.7814	0.7465	0.3944	0.0944	0.1934	0.2304	0.3963	0.2658	0.5421	0.299	0.5699	0.9602	0.4198	0.4267	0.3144	0.5052	0.4627	0.1831	0.2327	0.433	0.0547	0.5473	0.5894	0.2462	0.309	0.2014	0.1919	0.2665	0.8589
-1.23333	0.2325	0.2331	0.0596	0.243	0.5434	0.3204	0.2379	0.3323	0.2368	0.4153	0.4897	0.4197	0.9342	0.8497	0.5661	0.3883	0.9592	0.4511	0.3862	0.3222	0.7498	0.6984	0.4895	0.0889	0.2022	0.2823	0.446	0.3432	0.5418	0.2281	0.5639	0.8726	0.4187	0.4474	0.323	0.6123	0.5536	0.1601	0.2215	0.4129	0.0723	0.5596	0.5828	0.2585	0.3011	0.1226	0.1702	0.2849	0.9113
-1.2	0.2475	0.2079	0.1171	0.2924	0.4735	0.2983	0.1576	0.3494	0.3011	0.4058	0.475	0.463	0.9961	0.7844	0.5102	0.3999	0.8711	0.3914	0.3238	0.3629	0.6167	0.6564	0.371	0.0692	0.2463	0.2951	0.5048	0.3656	0.5151	0.1031	0.518	0.9323	0.4974	0.3555	0.3339	0.5517	0.5148	0.1525	0.1852	0.4345	0.0385	0.4484	0.601	0.234	0.3263	0.1092	0.1963	0.2717	0.7965
-1.16667	0.1984	0.2595	0.33	0.3775	0.5287	0.33	0.1284	0.2476	0.2722	0.3488	0.5154	0.442	0.9205	0.7163	0.4954	0.4398	0.8343	0.3959	0.3372	0.4102	0.6003	0.6303	0.4053	0.0572	0.2066	0.28	0.4726	0.2673	0.6171	0.171	0.4772	0.9402	0.6508	0.3415	0.333	0.5275	0.4997	0.1244	0.2816	0.446	0.0517	0.4549	0.6356	0.2371	0.4067	0.1771	0.1515	0.2752	0.774
-1.13333	0.1889	0.1549	0.3294	0.3897	0.6425	0.3588	0.1338	0.2044	0.2569	0.3283	0.4592	0.4993	0.9345	0.6881	0.481	0.4474	0.8649	0.4592	0.3552	0.5197	0.5876	0.6866	0.4209	0.0565	0.1365	0.3213	0.4466	0.2298	0.5916	0.2434	0.4703	0.837	0.6061	0.3269	0.31	0.5791	0.4997	0.143	0.3104	0.4294	0.0137	0.4262	0.6326	0.261	0.3644	0.2043	0.1392	0.3184	0.7808
-1.1	0.1522	0.1231	0.4303	0.2352	0.634	0.3533	0.1507	0.1804	0.2618	0.4251	0.549	0.497	0.9558	0.6859	0.4975	0.4082	0.8577	0.4664	0.3548	0.5654	0.6703	0.7276	0.3878	0.0732	0.1128	0.3475	0.3834	0.1924	0.5867	0.2778	0.4585	0.8808	0.5653	0.3919	0.3323	0.5934	0.5365	0.1635	0.2886	0.4015	-0.0125	0.4801	0.6262	0.2328	0.3888	0.2151	0.181	0.2472	0.8067
-1.06667	0.2008	0.1375	0.0682	0.1735	0.5904	0.4032	0.181	0.2002	0.2797	0.4395	0.5461	0.4593	0.8951	0.6503	0.5015	0.2866	0.8972	0.4753	0.4388	0.9755	0.6182	0.7532	0.3893	0.0783	0.0893	0.2908	0.3545	0.2063	0.4366	0.1627	0.5307	0.7786	0.8354	0.3804	0.3609	0.6568	0.5581	0.159	0.3649	0.3964	-0.0095	0.4721	0.7305	0.1971	0.3202	0.0852	0.195	0.2852	0.892
-1.03333	0.2498	0.1707	-0.2842	0.1265	0.5289	0.4049	0.1691	0.2308	0.2728	0.3943	0.6475	0.4783	0.8351	0.6282	0.5721	0.2868	0.8045	0.4203	0.45	0.7377	0.6691	0.7276	0.3523	0.0729	0.1159	0.3511	0.3656	0.2358	0.4948	0.1466	0.5758	0.8344	0.5672	0.3891	0.3678	0.5569	0.5575	0.1753	0.4125	0.3801	0.0067	0.5111	0.6933	0.1774	0.3764	0.0126	0.2439	0.2082	0.817
-1	0.2602	0.1514	0.0558	0.1452	0.5652	0.3682	0.1661	0.3456	0.2491	0.3683	0.6795	0.5355	0.8149	0.6129	0.4992	0.345	0.8492	0.4162	0.5827	0.5908	0.7508	0.7147	0.1998	0.0757	0.1924	0.3399	0.4134	0.1824	0.5796	0.1469	0.5137	0.9215	0.5017	0.4356	0.3257	0.5456	0.5836	0.1961	0.59	0.3353	0.0243	0.546	0.6107	0.2364	0.4492	0.0328	0.2292	0.1837	0.8853
-0.96667	0.2533	0.1879	0.2724	0.2222	0.6437	0.3686	0.0949	0.5628	0.3079	0.3187	0.54	0.5663	0.7751	0.5913	0.4253	0.337	0.8687	0.3852	1.3113	0.4629	0.7858	0.7254	0.272	0.0652	0.2415	0.2986	0.3928	0.1438	0.5313	0.2226	0.7285	0.9294	0.5146	0.452	0.2985	0.6452	0.6331	0.1782	0.4111	0.3046	0.0766	0.5201	0.6305	0.1978	0.3971	0.0609	0.2708	0.2366	0.8717
-0.93333	0.2359	0.1501	0.5062	0.2319	0.6686	0.3768	0.0952	0.3567	0.2598	0.39	0.576	0.5125	0.7937	0.6696	0.3871	0.3752	0.8395	0.4138	0.6872	0.3849	0.7816	0.6196	0.3305	0.0538	0.2465	0.3269	0.3549	0.1432	0.5336	0.1985	0.6925	0.8122	0.492	0.4713	0.3466	0.5336	0.6222	0.1768	0.3732	0.3273	0.1012	0.5499	0.6465	0.1723	0.3704	0.0783	0.2905	0.3381	0.9359
-0.9	0.229	0.1343	0.3448	0.3106	0.6735	0.3774	0.2175	0.5153	0.2451	0.5812	0.5537	0.5009	0.7578	0.6938	0.5177	0.3117	0.7749	0.3735	0.5072	0.2962	0.7576	0.7093	0.5057	0.0672	0.2658	0.3361	0.2804	0.1314	0.5926	0.223	0.6893	0.7286	0.5415	0.4465	0.3441	0.5488	0.5961	0.1548	0.4438	0.358	0.1119	0.5259	0.6013	0.1966	0.4494	0.2354	0.2478	0.2967	0.8586
-0.86667	0.2567	0.1492	0.2678	0.2571	0.6188	0.3393	0.2334	0.3659	0.2763	0.597	0.4156	0.499	0.7998	0.6824	0.5441	0.3477	0.6979	0.4149	0.47	0.3675	0.793	0.6918	0.2482	0.0711	0.2496	0.3447	0.365	0.143	0.5867	0.2335	0.6917	0.7412	0.4813	0.4025	0.3452	0.4941	0.5725	0.1732	0.3599	0.3737	0.104	0.5912	0.6473	0.405	0.4875	0.3807	0.2228	0.2308	0.8737
-0.83333	0.2456	0.1509	0.1566	0.2106	0.4765	0.3418	0.0765	0.3242	0.2031	0.5368	0.4957	0.5269	0.7683	0.725	0.5157	0.3567	0.7485	0.4642	0.5373	0.3919	0.8346	0.7366	0.2335	0.0519	0.2444	0.2527	0.3378	0.1364	0.6452	0.2434	0.7094	0.7383	0.4604	0.3961	0.338	0.508	0.5283	0.1781	0.3737	0.4085	0.0863	0.5507	0.6353	0.2152	0.4906	0.3096	0.2398	0.1359	0.8787
-0.8	0.2226	0.213	0.0049	0.169	0.4231	0.347	0.1643	0.4502	0.1672	0.5842	0.6045	0.5335	0.7475	0.715	0.5422	0.3514	0.7549	0.478	0.57	0.4322	0.8301	0.7836	0.3185	0.0632	0.1614	0.2402	0.372	0.1467	0.5382	0.1835	0.7241	0.6568	0.344	0.3545	0.3559	0.5104	0.518	0.1914	0.4238	0.2037	0.1122	0.5551	0.6143	0.1714	0.4485	0.1663	0.2099	0.2125	0.9188
-0.76667	0.2252	0.4203	-0.0481	0.1644	0.3748	0.3461	0.078	0.3313	0.1706	0.618	0.5801	0.5039	0.7566	0.677	0.6137	0.3662	0.8513	0.4584	0.5358	0.227	0.8186	0.7479	0.3301	0.018	0.1708	0.1983	0.3247	0.1349	0.542	0.1575	0.6511	0.663	0.4907	0.3646	0.3647	0.5519	0.4979	0.1803	0.3707	0.147	0.0811	0.5665	0.6243	0.2076	0.4391	0.1723	0.1621	0.2062	0.919
-0.73333	0.2364	0.322	0.0489	0.1755	0.3663	0.303	0.0908	0.2388	0.1546	0.6375	0.6572	0.5423	0.8391	0.7053	0.7438	0.476	0.889	0.4565	0.4793	0.2312	0.8433	0.6956	0.3874	0.0455	0.1561	0.2119	0.2766	0.2848	0.5034	0.1988	0.5751	0.6708	0.524	0.4224	0.3798	0.5865	0.5268	0.1258	0.3857	0.2068	0.091	0.4798	0.5984	0.2223	0.4594	0.1978	0.1503	0.1803	0.8212
-0.7	0.2162	0.2308	0.3579	0.1889	0.4286	0.3771	0.2367	0.2769	0.17	0.6397	0.4977	0.5495	0.8888	0.705	0.6919	0.4048	0.9007	0.4968	0.4578	0.2677	0.8576	0.7633	0.4258	0.0574	0.1375	0.2126	0.1479	0.248	0.4322	0.1731	0.6194	0.6136	0.5029	0.4132	0.3873	0.5521	0.5588	0.1695	0.3556	0.2649	0.1046	0.4157	0.7091	0.1244	0.4944	0.2502	0.0975	0.2569	1.0718
-0.66667	0.2268	0.2952	0.3794	0.33	0.379	0.3728	0.2413	0.3267	0.2168	0.7041	0.473	0.5733	0.9046	0.6831	0.6716	0.3697	0.921	0.5619	0.3888	0.2686	0.8257	0.853	0.5157	0.0354	0.1594	0.188	0.3158	0.2653	0.3871	0.2085	0.5967	0.5772	0.4592	0.3727	0.3541	0.5701	0.5262	0.1613	0.3182	0.3181	0.136	0.4557	0.6255	0.1923	0.5441	0.2458	0.0734	0.1723	1.327
-0.63333	0.2405	0.3104	0.3465	0.2838	0.4401	0.3693	0.2815	0.3371	0.2024	0.7666	0.4945	0.6105	0.8856	0.6504	0.6407	0.3565	0.9844	0.5352	0.3799	0.6959	0.8273	0.9754	0.739	0.0061	0.1498	0.1428	0.3758	0.3683	0.4944	0.2554	0.5547	0.5836	0.4496	0.3332	0.3832	0.6217	0.5097	0.1552	0.2996	0.2952	0.1431	0.4054	0.5308	0.2244	0.4959	0.2862	0.0326	0.1574	1.1687
-0.6	0.2169	0.3331	0.2481	0.222	0.3862	0.3509	0.0804	0.3512	0.1728	0.6417	0.456	0.5676	0.861	0.6114	0.6313	0.3653	0.8861	0.5529	0.4898	0.6851	0.7975	1.1674	0.3827	0.0571	0.1756	0.0981	0.6127	0.3294	0.3656	0.2707	0.5603	0.6048	0.5049	0.3506	0.36	0.6215	0.5344	0.24	0.3006	0.2152	0.1162	0.3741	0.6634	0.2841	0.5553	0.3351	0.023	0.1873	1.1576
-0.56667	0.2925	0.2199	0.3678	0.1798	0.4628	0.3415	0.1366	0.3795	0.1986	0.5978	0.4725	0.5213	0.8725	0.6165	0.6747	0.466	0.8303	0.5315	0.2995	0.4509	0.7417	1.0793	0.3208	0.0424	0.1945	0.1643	0.3352	0.1908	0.4275	0.1892	0.5845	0.6885	0.4661	0.3802	0.3946	0.6594	0.5174	0.2874	0.3113	0.2505	0.1163	0.4188	0.6323	0.3015	0.5313	0.3591	0.0713	0.1403	1.1435
-0.53333	0.2964	0.302	0.4933	0.2057	0.5345	0.3272	0.1751	0.365	0.2532	0.6271	0.4509	0.537	0.8853	0.6833	0.6209	0.4929	0.952	0.6464	0.3289	0.2613	0.7143	1.0614	0.3954	0.0248	0.1738	0.1663	0.2596	0.2053	0.4469	0.2138	0.5793	0.7137	0.5152	0.3606	0.3956	0.6161	0.5386	0.2142	0.3348	0.2379	0.1196	0.5053	0.5691	0.3333	0.5143	0.4252	0.0754	0.1141	1.0664
-0.5	0.3527	0.2382	0.5437	0.1668	0.5276	0.2663	0.2249	0.4507	0.2391	0.662	0.4781	0.479	0.8699	0.655	0.6838	0.5437	1.0548	0.662	0.2164	0.2579	0.7109	1.0864	0.5352	0.0242	0.1479	0.2234	0.3121	0.1775	0.3939	0.1792	0.6291	0.7982	0.4748	0.3727	0.4381	0.6643	0.5197	0.1589	0.276	0.2447	0.0964	0.5416	0.5676	0.2763	0.4989	0.4363	0.0568	0.1338	1.0772
-0.46667	0.346	0.2609	0.4407	0.1864	0.5972	0.3482	0.1993	0.5345	0.2544	0.6941	0.4741	0.4058	0.9374	0.6889	0.6949	0.5653	0.9703	0.7875	0.115	0.3726	0.6469	1.0481	0.2951	-0.0972	0.1469	0.2325	0.4411	0.2347	0.506	0.1678	0.6305	0.747	0.5688	0.3714	0.4469	0.7303	0.5199	0.1486	0.3412	0.2936	0.0828	0.5797	0.5859	0.2356	0.486	0.3303	0.084	0.168	1.1544
-0.43333	0.269	0.1703	0.1724	0.2131	0.6296	0.4225	0.1297	0.3871	0.2528	0.6203	0.243	0.3416	0.9945	0.6764	0.6595	0.5896	1.0351	0.7183	0.3914	0.3123	0.7424	1.0853	0.077	0.1163	0.1977	0.1832	0.343	0.2396	0.4405	0.1051	0.7185	0.7931	0.4691	0.3729	0.4446	0.7173	0.4756	0.1424	0.3401	0.2902	0.0935	0.5331	0.5882	0.3305	0.411	0.2539	0.1006	0.2068	1.1693
-0.4	0.2903	0.2583	0.2036	0.2001	0.5944	0.4584	0.1719	0.3565	0.2577	0.6378	0.2119	0.2207	0.9318	0.5934	0.5959	0.5841	1.1085	0.6821	0.2228	0.4081	0.7078	1.0929	0.1923	0.0036	0.3028	0.2729	0.2444	0.1826	0.4262	0.0904	0.6557	0.8003	0.4371	0.3903	0.4278	0.6296	0.4232	0.1462	0.3587	0.3511	0.0979	0.551	0.4593	0.4938	0.4166	0.2696	0.1398	0.2347	1.1505
-0.36667	0.3295	0.242	0.1215	0.1586	0.5945	0.4107	0.3773	0.4017	0.2585	0.5189	0.1885	0.2739	0.9295	0.675	0.593	0.561	1.0972	0.6139	0.2656	0.3128	0.6141	1.0764	0.2693	0.0084	0.2091	0.2757	0.1197	0.3228	0.429	0.1146	0.5974	0.7206	0.4735	0.4137	0.4172	0.5535	0.4549	0.1635	0.3318	0.4134	0.123	0.513	0.4451	0.4797	0.4384	0.3049	0.1262	0.1529	1.0154
-0.33333	0.3495	0.2357	0.1703	0.2219	0.4171	0.402	0.2563	0.3815	0.1792	0.5235	0.1311	0.2995	0.9989	0.7106	0.5925	0.5553	1.0831	0.6651	0.2276	0.36	0.5459	1.1813	0.4631	0.05	0.1071	0.276	0.1915	0.3046	0.4798	0.098	0.5781	0.6057	0.4956	0.4487	0.4238	0.6281	0.4573	0.1579	0.3554	0.3944	0.1176	0.4816	0.5013	0.4937	0.495	0.3252	0.1641	0.2816	0.9223
-0.3	0.3217	0.1633	0.2779	0.2092	0.4497	0.3262	0.2719	0.4664	0.1094	0.5016	0.0976	0.3905	0.9305	0.6888	0.5484	0.5796	1.1155	0.7611	0.0974	0.363	0.4675	1.2649	0.1784	0.0682	0.0592	0.3256	0.1652	0.1895	0.3165	0.1019	0.6587	0.696	0.4432	0.4386	0.4383	0.6022	0.4814	0.1547	0.3815	0.4149	0.1055	0.5864	0.5401	0.4997	0.5054	0.3015	0.1897	0.2664	0.8941
-0.26667	0.3058	0.1988	0.3145	0.2052	0.5478	0.3252	0.233	0.3994	0.1305	0.5399	0.0564	0.3989	1.0396	0.7517	0.5396	0.6469	0.987	0.7064	0.0269	0.2854	0.3713	1.2972	0.2416	0.0438	0.0929	0.3569	0.0612	0.1598	0.3859	0.1513	0.6159	0.6943	0.2936	0.4431	0.4328	0.6125	0.5017	0.1466	0.2921	0.3043	0.1212	0.4847	0.5759	0.4945	0.4863	0.364	0.2116	0.4117	0.9099
-0.23333	0.3209	0.1833	0.2542	0.1688	0.5401	0.3796	0.1476	0.3985	0.1852	0.5249	0.1062	0.5439	1.0286	0.7548	0.5243	0.6372	0.9711	0.7349	0.1435	0.3252	0.4559	1.0546	0.1218	0.0309	0.1275	0.3266	0.3311	0.148	0.4587	0.2355	0.627	0.7486	0.4893	0.4572	0.4483	0.599	0.4828	0.1895	0.3002	0.316	0.1219	0.4419	0.5736	0.3552	0.5431	0.3689	0.2252	0.2788	0.9328
-0.2	0.3069	0.1922	0.1289	0.1487	0.4829	0.3141	0.2171	0.406	0.223	0.5132	0.2209	0.5317	1.1544	0.7429	0.4583	0.6181	1.0886	0.7171	0.3858	0.2948	0.5431	0.992	0.1797	0.0275	0.137	0.2869	0.2352	0.1117	0.6206	0.1554	0.6713	0.7126	0.433	0.5215	0.4374	0.6276	0.4745	0.1551	0.2399	0.3232	0.1145	0.4464	0.6142	0.2574	0.5173	0.3603	0.1601	0.261	0.9833
-0.16667	0.3339	0.162	0.0664	0.1644	0.456	0.2836	0.1999	0.3963	0.2345	0.4382	0.3378	0.4943	1.1431	0.7461	0.4731	0.5727	1.1277	0.7205	0.3892	0.2598	0.5909	0.8867	0.1212	0.0301	0.1578	0.2923	0.1791	0.1671	0.6513	0.1691	0.6558	0.7621	0.4788	0.5662	0.4339	0.6186	0.5458	0.1308	0.2657	0.401	0.1164	0.6149	0.5322	0.2289	0.4581	0.2963	0.1331	0.2944	0.9661
-0.13333	0.3646	0.1934	0.1635	0.2095	0.4374	0.2973	0.1855	0.4136	0.2074	0.45	0.3715	0.502	1.0637	0.8673	0.5338	0.4815	1.1162	0.7211	0.1651	0.2473	0.766	0.7955	0.2483	0.0544	0.13	0.2863	0.2024	0.1606	0.5781	0.1944	0.6218	0.8317	0.5087	0.5525	0.4893	0.5424	0.4716	0.1158	0.301	0.3245	0.128	0.4728	0.5624	0.2147	0.4087	0.2996	0.1368	0.1683	0.9994
-0.1	0.3296	0.1797	0.1971	0.3292	0.4523	0.3018	0.1931	0.3259	0.2719	0.4032	0.4441	0.489	1.0804	0.7987	0.5325	0.49	0.9047	0.7353	0.1246	0.2964	0.6751	0.7015	0.4057	0.0636	0.1356	0.342	0.2825	0.1999	0.4437	0.2147	0.6591	0.7983	0.5224	0.5369	0.484	0.4874	0.4673	0.2277	0.3116	0.3312	0.1131	0.1181	0.6557	0.2214	0.4144	0.3243	0.1687	0.1419	1.0155
-0.06667	0.328	0.1087	0.4161	0.3316	0.4052	0.2409	0.2505	0.3021	0.2838	0.4287	0.5711	0.5127	1.0707	0.8317	0.555	0.461	0.8364	0.7215	0.0612	0.2404	0.7483	0.7115	0.4808	0.0721	0.1875	0.5117	0.2293	0.2217	0.621	0.1487	0.6672	0.7927	0.6047	0.5356	0.4981	0.4775	0.457	0.1432	0.3318	0.2685	0.0731	0.3628	0.565	0.2559	0.3738	0.282	0.1436	0.1844	1.017
-0.03333	0.3729	0.0954	0.3528	0.3309	0.4194	0.3128	0.2354	0.3003	0.2515	0.486	0.4826	0.4424	1.0473	0.8144	0.5492	0.4699	0.9689	0.7068	0.1208	0.3481	0.7591	0.7391	0.4004	0.1637	0.2299	0.3956	0.2387	0.2442	0.5704	0.1815	0.7033	0.7786	0.5763	0.5678	0.4728	0.4466	0.4339	0.1463	0.3306	0.3093	0.0662	0.317	0.5515	0.2971	0.3385	0.2398	0.1295	0.2016	1.0972
0	0.401	0.128	0.2464	0.2939	0.4077	0.3428	0.2923	0.2051	0.249	0.5622	0.5249	0.393	1.0974	0.7864	0.5783	0.483	1.0223	0.674	0.1976	0.4111	0.7321	0.846	0.3997	0.1826	0.2519	0.3626	0.2841	0.2974	0.7143	0.226	0.7313	0.9665	0.5438	0.5819	0.4226	0.4501	0.4461	0.1512	0.3279	0.1103	0.0883	0.4993	0.5007	0.2701	0.37	0.2492	0.1673	0.1984	1.1113
0.03333	0.6733	0.124	0.6459	0.2954	0.4255	0.2599	1.201	0.2496	0.207	0.5427	0.5849	0.424	1.0562	0.7513	0.5948	0.5306	1.0383	0.686	1.1566	0.4428	0.6091	0.5351	0.3907	0.1171	0.2429	0.2753	0.2433	0.3402	0.7063	0.2258	0.759	0.5157	0.5074	0.6019	0.4133	0.4957	0.4455	0.1946	0.2424	0.6368	0.149	0.5832	0.5646	0.2859	0.3757	0.2294	0.1678	0.1778	1.0227
0.06667	0.7116	-0.9279	-0.7354	0.2096	2.1225	0.0615	0.0815	0.2968	0.1821	0.3915	0.9141	0.4616	1.1782	0.9427	0.6811	0.5655	1.3135	0.6578	0.9068	0.5557	0.848	0.5911	0.4855	1.0309	0.4666	0.5291	0.3166	0.7582	0.6605	0.2377	0.7117	0.4341	0.4963	0.7658	0.4228	0.6132	0.4837	0.2241	0.1964	0.7496	0.308	0.49	0.571	0.3135	0.4057	0.3036	0.1521	-0.0709	1.1257
0.1	0.4464	-0.6645	0.5078	-0.0023	1.663	-0.6216	0.4409	0.5183	0.4011	0.5131	1.6893	1.2229	2.1681	2.1515	0.7805	0.944	1.769	0.9914	0.8856	0.4343	0.8593	0.5152	0.7289	0.158	0.8193	0.6808	0.2443	0.947	0.5791	2.0058	0.7624	-0.4595	0.5047	0.1408	0.4749	0.8204	0.471	0.6298	0.182	1.3454	0.1944	3.4294	0.5399	0.3043	0.4143	0.2561	0.1255	-1.7184	1.0062
0.13333	1.0362	-0.1242	0.7969	0.5134	1.5358	0.6193	0.4174	0.7132	0.3676	0.8956	2.4052	2.3901	2.7662	3.2087	1.0413	1.206	2.1553	1.4616	1.0151	0.7778	1.2938	0.9236	1.1204	0.5053	1.2991	0.8232	0.3003	0.3391	0.6064	0.2581	0.7684	0.4297	0.9633	1.4595	0.5146	0.8636	0.606	0.3727	0.844	2.8707	0.2415	2.0075	0.5593	0.4251	0.4143	0.4634	0.1245	0.1631	0.8559
0.16667	0.6676	0.4997	0.7535	0.8373	2.0053	1.1884	0.6816	1.0578	0.5351	1.2741	2.9705	3.0401	3.0794	3.8522	1.329	1.3199	2.0881	1.5213	1.0603	0.7256	1.3053	1.0787	1.2685	0.9179	1.3376	1.1703	2.1257	0.8257	0.0273	0.4974	1.0984	0.8101	0.6182	1.3091	1.2265	1.0498	0.7324	0.5256	0.6587	0.7576	0.084	1.8447	0.7841	0.8207	0.4309	0.5213	0.093	0.6043	0.9313
0.2	0.5577	0.1577	0.9413	1.0188	2.0124	1.275	1.0806	1.4059	0.5109	1.3279	3.3422	3.2878	3.3245	4.168	1.5938	1.3999	1.987	1.5223	1.1364	1.0199	1.5144	1.1584	1.2691	0.8886	1.3719	1.2955	0.571	1.1478	0.9791	0.7919	1.7982	0.901	1.3733	1.3909	0.7623	1.0249	0.8923	0.6744	-0.0954	0.9341	0.5201	1.8678	0.7314	1.1637	0.4543	0.6322	0.1644	1.0401	1.3242
0.23333	0.8188	0.2239	0.9548	0.8524	2.1124	1.2999	0.9701	1.4744	0.4971	1.1982	3.2293	3.6257	3.5961	4.3556	1.6533	1.4015	1.7612	1.4776	1.303	1.27	1.4248	1.0844	1.3083	0.8999	1.4322	1.1168	0.3758	1.2216	0.0919	0.736	1.7706	1.0239	1.3856	1.4766	0.5986	1.1204	0.9725	0.6772	0.1786	0.9686	0.7228	2.0081	0.9541	1.2898	0.5391	0.7205	0.5147	1.0899	1.8493
0.26667	0.5882	0.1834	0.7699	0.9215	2.0456	1.2528	1.0691	1.4042	0.5399	1.2459	3.1046	3.4322	3.6389	4.3153	1.6563	1.3408	1.6396	1.3234	1.214	1.2705	1.5042	1.0812	1.1021	0.9599	1.5248	1.0782	0.6507	1.1278	0.9901	0.3268	1.8172	1.0534	1.2727	1.4382	0.6928	1.113	0.8885	0.6611	0.7287	0.8752	0.6431	1.5281	1.0897	1.1044	0.8069	0.7218	0.8949	0.9944	2.106
0.3	0.4117	0.3041	0.6456	0.951	1.9586	1.368	1.0277	1.318	0.5903	1.1722	3.44	3.3287	3.517	4.0113	1.7241	1.3138	1.662	1.3073	1.1499	1.0552	1.3778	1.085	1.0157	1.0563	1.4499	1.2923	0.8815	1.011	0.941	0.513	1.6845	0.7494	1.3875	1.1884	0.6714	1.0485	0.8884	0.6395	1.1588	0.8389	0.8651	1.2426	1.4941	0.9164	1.0109	0.6663	0.9108	0.9383	1.7151
0.33333	0.4568	0.5016	0.7555	0.757	1.9539	1.3195	0.9889	1.3967	0.5635	1.0975	3.7671	3.1295	3.5083	4.417	1.8268	1.2878	1.6439	1.3913	1.1698	1.0621	1.484	1.2001	1.086	0.9237	1.4411	1.1969	1.052	0.8942	0.6077	0.5954	1.5378	0.6057	1.3015	1.0065	0.5695	1.0494	0.9062	0.6602	1.2758	0.762	0.8798	1.0847	1.5113	0.8828	0.9881	0.5614	1.0135	0.9598	1.396
0.36667	0.5188	0.3276	1.0623	0.6627	2.0028	1.4229	0.9564	1.4705	0.6279	1.1731	3.8208	3.1266	3.4643	4.2843	1.8069	1.2494	1.6489	1.5264	1.3272	1.2665	1.4915	1.1541	1.1932	0.9147	1.6669	1.2324	1.061	0.6798	0.5045	0.5994	1.4241	0.6207	1.1493	0.924	0.5518	1.0615	0.9252	0.7838	1.2899	1.0078	0.8948	0.9526	1.3668	1.0013	0.8111	0.5546	1.1146	1.028	1.4283
0.4	0.3477	0.3877	0.6721	0.6379	2.0993	1.4437	1.0826	1.3979	0.6206	1.1384	3.3864	3.0635	3.296	4.1246	1.8255	1.3877	1.7399	1.7538	1.1128	1.4868	1.7801	1.0998	1.3965	0.9473	1.7235	1.358	0.9127	0.6162	0.4292	0.8665	1.345	0.7132	0.9845	0.6723	0.594	1.0188	0.9763	0.8257	1.2265	1.1635	0.8396	1.0026	1.2398	1.1056	0.7302	0.5818	1.328	1.0195	1.3652
0.43333	0.1604	0.2228	0.5651	0.5851	2.1643	1.5245	1.1378	1.6174	0.7092	1.2856	3.3122	3.085	3.056	4.1109	1.78	1.5263	1.7608	1.7999	1.2025	1.6984	1.6981	1.231	1.4963	1.0012	1.8716	1.392	0.8366	0.6607	0.4857	0.6593	1.2061	0.8152	0.927	0.5289	0.5903	1.0875	0.9303	0.8666	1.3951	1.4068	0.9229	1.2434	1.1226	1.0841	0.6786	0.4716	1.2756	1.0013	1.4119
0.46667	0.1693	0.2551	0.5765	0.5329	2.2127	1.8291	1.2625	1.7277	0.7991	1.2728	3.0569	3.1822	3.1102	4.1103	1.7862	1.548	1.8652	1.83	1.2687	1.8761	1.7212	1.4146	1.5505	1.0908	1.9795	1.352	0.7653	0.5765	0.8477	0.7094	1.2568	0.7782	0.965	0.6118	0.6052	1.0967	0.8885	0.9892	1.2495	1.4814	0.7495	1.4291	0.9747	1.0098	0.5947	0.5001	1.2332	0.9675	1.5446
0.5	0.3469	0.3409	0.5057	0.3653	2.1129	1.7563	1.1953	1.8021	0.7736	1.2464	3.1425	3.3543	3.1381	4.1722	1.7743	1.7135	1.75	1.9301	1.053	2.0489	1.7412	1.7119	1.58	1.161	1.8967	1.3365	0.7141	0.5662	0.672	0.9105	1.3301	0.8349	1.086	0.6936	0.6664	1.1389	0.9905	1.0893	1.3209	1.6581	0.9207	1.4255	0.9714	0.9814	0.5678	0.5047	1.3061	0.8382	1.5735
0.53333	0.5065	0.7522	0.5116	0.3067	2.4525	1.81	1.3731	1.8926	0.8506	1.2362	3.3507	3.7083	3.2597	4.2469	1.7888	1.7186	1.8208	1.9917	1.0744	2.0799	1.9177	1.7983	1.711	1.2145	1.8469	1.2745	0.8613	0.777	0.7295	0.956	1.2955	0.9066	1.1979	0.77	0.7266	1.2289	0.9536	1.1401	1.3256	1.7706	1	1.4119	0.8613	0.947	0.5618	0.5087	1.3647	0.784	1.598
0.56667	0.5084	0.8695	0.5342	0.3674	2.5305	1.8903	1.126	1.6887	0.8733	1.1914	3.6508	3.3059	3.1009	4.1905	1.9829	1.7393	1.9129	2.0768	1.0488	2.2203	1.9875	1.8103	1.6809	1.1197	1.8489	1.5524	0.883	0.8809	0.7665	0.651	1.511	0.9097	1.2127	0.8123	0.7971	1.2525	0.9823	1.1729	1.2726	2.1895	1.0656	1.2204	0.9124	0.9615	0.5805	0.653	1.3219	0.8216	1.6622
0.6	0.4058	0.7092	0.4816	0.5906	2.5201	2.0405	1.0953	1.6658	0.7753	1.2981	3.852	3.3829	3.1683	4.2673	1.8729	1.8507	1.9896	2.0854	0.9506	2.2835	2.0156	1.98	1.8455	1.2439	2.0363	1.5528	0.7652	0.9735	0.9775	0.6309	1.6315	0.8556	1.1657	0.8823	0.9265	1.2788	0.9893	1.2353	1.2238	1.6738	1.2227	1.222	0.8797	0.9522	0.564	0.793	1.2179	0.8581	1.5502
0.63333	0.5732	0.8018	0.5671	0.6753	2.626	2.2041	1.1771	1.9632	0.8264	1.5924	3.8391	3.4411	3.3208	4.3051	1.9275	1.7565	2.0895	2.302	1.0702	2.2262	2.0623	2.0117	2.0041	1.3122	2.1401	1.6126	0.6615	0.9327	0.9429	0.544	1.6009	0.788	1.1255	0.8836	1.0298	1.3634	1.0288	1.2432	1.4175	1.7315	1.2214	1.2175	0.7971	0.8551	0.5253	0.5439	1.1907	0.9269	1.3804
0.66667	0.4966	0.5901	0.6823	0.6006	2.7139	2.3822	1.3735	2.0995	0.8344	1.5779	3.9042	3.296	3.1775	4.2183	2.1059	1.8372	2.1989	2.2678	1.1327	2.2793	2.0564	2.0107	1.9975	1.3761	2.2076	1.5104	0.5715	1.0127	0.9456	0.6269	1.5415	0.8984	1.1874	0.877	1.0661	1.3706	1.0686	1.2771	1.3683	1.5978	1.1967	1.3542	0.6941	0.8621	0.4593	0.4627	1.1615	1.0677	1.4188
0.7	0.4665	0.6349	0.6786	0.5221	2.9654	2.4274	1.4003	2.2017	0.8951	1.651	3.9059	3.335	3.3057	4.2527	2.2988	1.865	2.2809	2.2759	1.2507	2.299	2.0329	1.9392	2.1992	1.4329	2.2753	1.5915	0.8182	0.9342	0.9906	0.5522	1.4355	0.9368	1.4639	0.8741	1.1049	1.2395	1.0489	1.3202	1.591	1.6792	1.1927	1.6274	0.4773	0.9402	0.4505	0.4928	1.072	1.063	1.4038
0.73333	0.5724	0.6786	0.6989	0.4634	2.8312	2.4718	1.4708	2.3626	1.0248	1.8871	3.9235	3.5554	3.1876	4.1567	2.46	1.8089	2.2973	2.3651	1.0932	2.2223	1.9342	2.1448	2.2623	1.5555	2.2265	1.6206	0.6563	1.0279	1.0025	0.6485	1.372	0.9838	1.1744	0.9478	1.0565	1.2796	1.1294	1.2932	1.5731	1.573	1.235	1.605	0.438	0.9091	0.542	0.4634	0.9828	1.103	1.6006
0.76667	0.4913	0.8538	0.8432	0.5493	2.7515	2.5741	1.4497	2.2609	0.9347	1.8141	3.669	3.4592	3.2467	4.2949	2.4134	1.8356	2.2926	2.4232	1.3208	2.236	1.8409	2.3829	2.2815	1.6489	2.401	1.5665	0.6813	0.9887	0.9891	0.8363	1.4129	1.1431	1.2979	1.0532	1.057	1.3131	1.1843	1.3118	1.6115	1.4323	1.3413	1.8209	0.6532	0.9546	0.5645	0.4728	1.0064	1.2598	1.5646
0.8	0.433	0.9783	0.9645	0.4818	2.7765	2.4725	1.4971	2.3587	0.8746	1.5856	3.7541	2.919	2.9918	4.1139	2.5267	1.8439	2.4627	2.5312	1.4278	2.1456	1.9534	2.4471	2.5366	1.6265	2.4856	1.613	0.6076	1.0228	0.9413	0.9986	1.6135	1.1838	1.2385	1.0771	1.1085	1.3135	1.1992	1.3857	1.7533	1.5833	1.5225	1.7407	0.9473	0.9692	0.5863	0.6597	0.998	1.1801	1.4746
0.83333	0.3735	0.6243	0.923	0.5164	2.9676	2.6009	1.609	2.3917	0.9035	1.6702	3.6611	3.1761	3.1795	4.0261	2.5599	1.8731	2.5636	2.722	1.4809	1.8827	1.8314	2.3568	2.4314	1.6825	2.4943	1.6982	0.593	0.9754	0.8712	1.0527	1.6244	1.2014	1.4028	1.2113	1.1074	1.4109	1.1743	1.4014	1.694	1.8581	1.5396	1.7342	1.0874	1.0058	0.5973	0.5621	1.0192	1.4184	1.3724
0.86667	0.3581	0.6593	0.9959	0.5952	3.2626	2.6887	1.7855	2.6132	0.9305	1.553	3.6793	3.1383	3.1857	3.8886	2.6461	1.9884	2.4654	2.7702	1.4699	1.7703	1.9753	2.4041	2.4862	1.6199	2.5385	1.7451	0.5965	1.1803	0.8548	0.877	1.6579	1.1535	1.1545	1.1834	1.1433	1.3006	1.1696	1.4378	1.7156	1.8577	1.7806	1.8741	1.0753	0.9701	0.6466	0.4736	1.0107	1.4194	1.4088
0.9	0.381	0.7399	1.2262	0.6351	3.0712	2.6087	1.7646	2.6425	0.9249	1.6836	3.4521	2.7632	2.9573	3.9927	2.4961	1.9162	2.5007	2.7291	1.422	1.9085	2.1366	2.4714	2.5854	1.5336	2.5711	1.7992	0.6372	1.0351	0.9091	0.7129	1.6397	1.2572	1.1009	1.1794	1.1384	1.3838	1.261	1.4634	1.6849	1.8786	1.6637	2.0504	1.2142	1.0281	0.6904	0.4433	1.1206	1.4446	1.3306
0.93333	0.483	0.8767	1.2701	0.6034	3.0373	2.8101	1.8183	2.5695	0.9138	1.6995	3.6462	2.7311	2.995	3.8382	2.586	2.015	2.5122	2.7311	1.5551	2.1555	2.3931	2.4088	2.7217	1.5186	2.6899	1.7319	0.6733	1.0286	0.9886	0.5885	1.6485	1.2504	1.1169	1.2091	1.2389	1.5145	1.3359	1.5012	1.6363	1.9704	2.0159	2.1235	1.4405	1.1367	0.7452	0.4795	1.2162	1.5286	1.627
0.96667	0.427	0.7672	1.0529	0.6233	3.1527	2.9178	1.907	2.3822	0.8968	1.6707	3.7564	2.7889	2.9926	3.486	2.7195	2.1049	2.5044	2.9579	1.7085	2.2866	2.5792	2.6204	2.7965	1.7964	2.8992	1.8187	0.7249	1.0148	1.0591	0.6396	1.692	1.1964	1.1257	1.1578	1.205	1.5208	1.3927	1.5979	1.8172	2.1261	2.0148	2.2066	1.4379	1.0205	0.7968	0.4652	1.263	1.5269	1.6747
1	0.5758	0.6733	1.1376	0.7042	3.2785	2.9209	1.9335	2.3635	0.9997	1.6879	3.8027	2.986	2.6653	3.0848	2.8923	2.1744	2.3751	2.957	1.7823	2.3788	2.7023	2.5861	2.959	1.8246	2.8177	1.7032	0.9839	1.1545	1.2712	0.7991	1.594	1.0492	1.2023	1.1063	1.2516	1.5491	1.4759	1.6539	1.9375	2.3214	1.9764	2.2851	1.5332	1.1185	0.8447	0.4677	1.2657	1.5302	1.7082
1.03333	0.5395	0.5507	1.1124	0.6951	3.353	2.7422	2.1678	2.5414	1.0136	1.5737	3.6181	2.9036	2.3083	3.1196	2.8221	2.2015	2.4635	2.96	1.9943	2.5475	2.627	2.4729	2.9995	1.7742	2.5909	1.6038	1.0955	1.215	1.5367	0.8805	1.5993	1.0712	1.1625	1.1009	1.3325	1.6299	1.4654	1.6317	2.0066	2.1942	1.9525	2.2498	1.5679	1.1892	0.9432	0.4539	1.2831	1.5573	1.7393
1.06667	0.4128	0.5754	0.9837	0.6776	3.265	2.8272	1.6125	2.0187	1.0904	1.5367	3.6567	2.9367	2.3196	3.089	2.7514	2.2433	2.3743	2.9488	2.2355	2.7181	2.676	2.5794	3.0028	1.7268	2.5018	1.7672	1.1427	1.2356	1.5913	0.7706	1.7192	1.0191	1.0316	1.1202	1.3083	1.7447	1.52	1.7058	2.0104	1.8086	2.0194	2.0863	1.4614	1.1415	0.8319	0.457	1.1319	1.4413	1.7628
1.1	0.4325	0.6187	1.0259	0.5844	3.2392	2.9149	1.7875	1.8726	1.1245	1.6386	3.5409	2.8293	2.4018	3.0291	2.6939	2.2104	2.4273	2.7562	2.0732	2.8745	2.7004	2.7332	2.8516	1.5648	2.4919	1.8583	1.0746	1.0038	1.4983	0.7403	1.7388	1.0085	1.0437	1.1006	1.3523	1.688	1.471	1.7168	2.0407	1.8518	2.0776	2.0462	1.6738	1.1813	0.8809	0.4056	1.1568	1.5142	1.8235
1.13333	0.4852	0.6333	1.0049	0.6616	3.2606	2.9435	1.8395	2.4177	1.0286	1.5667	3.3095	2.7678	2.2831	2.6822	2.8156	2.2124	2.4503	2.5388	2.2691	2.9876	2.8498	2.8261	2.6244	1.6327	2.5144	1.9583	1.1669	1.0537	1.4576	0.8344	1.9076	1.0087	1.1236	1.0165	1.3971	1.5832	1.5017	1.7151	1.8603	2.0748	1.7996	2.1499	1.641	1.1233	0.9175	0.4973	1.3423	1.5106	1.9089
1.16667	0.4504	0.7857	0.8789	0.6971	3.4577	3.1174	1.8788	2.6464	1.0272	1.5709	3.3497	2.5421	2.2849	2.6286	2.9027	2.133	2.402	2.5139	2.0583	2.8012	3.0456	2.6686	2.594	1.6747	2.4702	1.9032	1.1838	1.1556	1.3338	0.712	1.9572	0.9808	1.2007	0.8961	1.4439	1.4946	1.4403	1.7343	1.8343	2.0038	1.919	2.1294	1.6522	1.1174	0.9578	0.5601	1.3113	1.6129	2.1032
1.2	0.4576	0.7568	1.0415	0.6747	3.7675	3.0516	1.8769	2.4999	1.0039	1.5693	3.1708	2.476	2.4137	2.4769	3.039	2.0984	2.5357	2.5133	2.2589	3.1354	2.6968	2.478	2.6445	1.4964	2.565	1.8884	1.1762	1.0673	1.1384	0.8009	1.9677	1.0771	1.4527	0.8474	1.4634	1.4597	1.4253	1.6902	1.7691	1.9402	2.2308	2.1401	1.7207	1.2651	0.992	0.6657	1.3599	1.5178	2.0085
1.23333	0.4801	0.7327	1.0168	0.6701	3.667	3.06	1.8821	2.493	1.0848	1.5298	3.0296	2.4329	2.2278	2.5737	3.0849	2.0245	2.4206	2.4613	2.2304	3.2361	2.4003	2.5284	2.8704	1.4089	2.7696	1.7592	1.1552	1.1355	1.2732	0.6571	1.8227	1.2068	1.3439	0.7647	1.3288	1.5162	1.3558	1.6238	1.9075	1.9104	2.2667	1.838	1.6903	1.3479	1.0336	0.5729	1.3649	1.4034	1.9797
1.26667	0.432	0.7332	0.9353	0.6972	3.4353	3.0903	1.884	2.426	0.9959	1.73	2.8995	2.4423	1.8983	2.489	2.9979	2.092	2.4078	2.4906	2.353	3.2298	2.3961	2.5239	3.0275	1.4223	2.7244	1.8397	1.2157	1.3669	1.2611	0.7275	1.7764	1.2125	1.1921	0.7452	1.344	1.5235	1.4628	1.5968	1.8774	1.9158	2.1747	1.769	1.6512	1.3888	1.0552	0.4612	1.4587	1.3046	1.8393
1.3	0.4096	0.7119	0.7877	0.5759	3.4069	3.3173	1.838	2.4926	0.9429	1.7845	2.9079	2.3989	1.6642	2.2078	2.852	2.2613	2.3313	2.4094	2.2951	3.3899	2.283	2.8391	2.6124	1.3641	2.4731	1.9543	1.1208	1.5193	1.0216	0.7408	1.7932	0.9227	1.3003	0.8011	1.4682	1.5644	1.4917	1.5396	1.9754	1.939	2.0112	1.7096	1.7124	1.2216	1.014	0.4943	1.5557	1.2182	1.8059
1.33333	0.4952	0.7453	0.8521	0.3887	3.3905	3.1574	1.7706	2.4933	0.9019	1.8438	2.4792	2.4807	1.7546	2.1636	2.8587	2.2642	2.3952	2.4557	2.2879	3.2813	2.4824	2.9271	2.4347	1.4597	2.2945	1.9467	1.3128	1.5065	1.4131	0.757	1.5593	0.8541	1.1515	0.8841	1.4406	1.462	1.5576	1.5231	1.9121	1.8381	2.0823	1.8459	1.6563	1.2676	0.9228	0.401	1.5151	1.2813	1.8916
1.36667	0.5893	0.7964	0.9998	0.458	3.3289	3.0708	1.7041	2.316	0.8241	1.6604	2.3945	2.1796	1.9654	1.8212	2.8965	2.2248	2.4916	2.6915	2.0826	3.4538	2.467	2.8831	2.3515	1.354	2.1723	2.0026	1.2463	1.4596	1.7965	0.8816	1.5938	0.8501	1.1476	0.9906	1.4575	1.5361	1.4699	1.5443	1.7811	1.9312	2.1996	1.9151	1.6633	1.1451	0.9511	0.4529	1.4404	1.3262	1.8855
1.4	0.585	0.7547	1.1278	0.4121	3.5365	3.0597	1.6317	2.1571	0.8357	1.4656	2.3581	2.1145	2.0467	1.7288	2.8106	2.0937	2.3792	2.5007	2.3705	3.4498	2.5611	2.7255	2.2293	1.4645	2.0671	2.005	1.5027	1.3923	1.6207	0.7636	1.7511	0.8568	1.1966	0.9921	1.4205	1.322	1.5309	1.4483	1.8242	1.892	2.2245	2.0452	1.6595	1.2209	0.9086	0.5147	1.3828	1.3036	1.4921
1.43333	0.4667	0.7428	0.9293	0.3948	3.4387	2.9501	1.6451	2.042	0.8887	1.3144	2.3696	2.1952	1.8319	1.7786	2.7514	2.0277	2.3679	2.4032	2.3201	3.5572	2.6065	2.7131	2.3016	1.4408	2.1837	2.0946	1.5017	1.4223	1.4682	0.9418	1.6856	0.9193	1.0732	0.9025	1.4168	1.3811	1.5503	1.3976	1.7368	1.8602	2.1551	2.074	1.7247	1.2255	0.8969	0.5531	1.5137	1.2404	1.4838
1.46667	0.5212	0.7295	0.8088	0.4533	3.2444	2.8656	1.473	2.0455	0.8294	1.2707	2.4567	2.0447	1.8014	1.8441	2.6925	2.0301	2.3269	2.324	2.0716	3.511	2.7218	2.6121	2.2458	1.4792	2.138	2.0557	1.1876	1.4273	1.5224	1.1521	1.6162	0.9259	1.1021	0.9859	1.4032	1.1234	1.5887	1.388	1.6955	1.7309	2.2133	1.9371	1.8459	1.1543	0.9251	0.5758	1.5942	1.1147	1.5841
1.5	0.4802	0.6597	0.7548	0.6678	3.1713	2.735	1.588	2.2548	0.6547	1.1013	2.5409	2.0526	1.7145	1.8574	2.8257	2.1442	2.5857	2.452	2.2401	3.2302	2.7004	2.6242	2.4186	1.5421	2.0513	1.8433	1.0468	1.3996	1.544	1.1782	1.4659	0.953	1.1354	1.0215	1.3606	1.2759	1.5448	1.2798	1.7223	1.6407	2.2199	1.8798	1.7796	1.066	0.8841	0.6011	1.663	1.0982	1.587
1.53333	0.4654	0.5406	0.5791	0.7284	3.1029	2.5718	1.2742	1.963	0.609	1.088	2.3317	1.967	1.5364	1.638	2.8177	2.087	2.499	2.3994	2.2947	3.0505	2.4707	2.4067	2.4408	1.5629	1.9755	1.8274	1.1741	1.3635	1.6623	1.3361	1.3996	0.9181	1.0325	1.0562	1.398	1.1263	1.4809	1.3203	1.6886	1.6907	2.2966	1.7729	1.8557	1.0338	0.8518	0.6168	1.6497	0.9799	1.4202
1.56667	0.3927	0.4459	0.5724	0.5059	3.0505	2.2556	1.3207	1.8259	0.6569	1.0173	2.3073	1.9355	1.4913	1.4291	2.6141	2.1731	2.3916	2.3943	2.3601	2.9694	2.5098	2.4804	2.2704	1.7059	1.8392	1.7503	1.0621	1.5055	1.7966	1.2321	1.3058	0.8462	0.9136	0.9124	1.3768	1.2859	1.4596	1.3345	1.6321	1.6127	2.0717	1.753	1.7578	1.123	0.7868	0.539	1.589	0.981	1.5104
1.6	0.4508	0.4639	0.5081	0.51	2.9245	2.0455	1.4375	1.8973	0.7239	0.9708	2.404	1.783	1.5273	1.4361	2.4203	2.1699	2.413	2.3219	1.9359	3.3031	2.5309	2.2926	2.1403	1.6014	1.764	1.7856	1.1078	1.5262	1.6998	1.1212	1.2227	0.8704	0.9177	0.8979	1.318	0.9719	1.408	1.3795	1.529	1.6417	1.9989	1.6459	1.7212	1.1538	0.5782	0.4801	1.3868	1.0511	1.4862
1.63333	0.399	0.4505	0.3617	0.5224	2.8225	1.99	1.5564	2.137	0.795	1.009	2.2996	1.6853	1.5396	1.3877	2.3769	2.2141	2.4928	2.2643	1.8547	3.4187	2.758	2.208	2.0842	1.597	1.7205	1.8283	0.8914	1.4448	1.634	1.3091	1.2755	0.8194	0.9374	0.86	1.2602	1.1549	1.4245	1.331	1.435	1.6289	2.0216	1.6066	1.609	1.2302	0.6831	0.4532	1.3402	1.0801	1.3566
1.66667	0.3838	0.5385	0.2986	0.4614	2.7463	2.0094	1.4518	1.997	0.863	1.0133	2.3474	1.6162	1.5261	1.3594	2.2717	2.2049	2.5159	2.3788	1.844	3.4789	2.8601	2.2855	2.3211	1.7428	1.7838	1.9609	0.9412	1.4415	1.5928	1.1806	1.2773	0.779	0.9931	0.8248	1.3061	0.9062	1.3932	1.2967	1.4118	1.6489	2.1075	1.6963	1.4343	1.2831	0.6803	0.4448	1.3572	1.0929	1.4732
1.7	0.4219	0.4694	0.3138	0.432	2.8159	2.0074	1.4531	1.7478	0.8213	0.9922	2.5142	1.3581	1.5784	1.4889	2.4221	2.1764	2.4025	2.4928	1.864	3.5189	2.7454	2.1882	2.3171	1.6081	2.1555	1.851	1.0956	1.395	1.5988	1.5348	1.2407	0.7575	1.0197	0.765	1.319	1.0978	1.3523	1.252	1.4865	1.5922	2.0726	1.7137	1.5249	1.2487	0.615	0.4751	1.3298	1.1034	1.6607
1.73333	0.3497	0.3732	0.4204	0.5685	2.5757	1.7095	1.3113	1.6784	0.8716	0.9655	2.0771	1.3235	1.5239	1.2808	2.6304	2.1798	2.3808	2.4393	2.0001	3.6742	2.6725	2.3385	2.0321	1.7323	2.0581	1.8089	1.0567	1.5926	1.454	0.9966	1.2164	0.6673	1.0627	0.8281	1.277	1.0449	1.3336	1.1966	1.4385	1.5735	2.0258	1.7418	1.5697	1.2144	0.5661	0.4873	1.2729	1.022	1.4377
1.76667	0.3295	0.4242	0.4412	0.5604	2.6694	1.8133	1.2035	1.6215	0.8143	0.8582	2.3381	1.3453	1.3574	1.1112	2.6128	2.1689	2.3369	2.4399	1.6884	3.5246	2.5882	2.3211	2.3208	1.7562	2.0129	1.9188	0.9998	1.5103	1.593	1.0677	1.123	0.5918	1.0346	0.8312	1.289	1.2169	1.257	1.2308	1.2824	1.5747	1.9859	1.7668	1.3819	1.1006	0.5784	0.4999	1.2209	1.0908	1.1767
1.8	0.3711	0.5337	0.3502	0.6298	2.6027	1.9741	1.2115	1.665	0.6788	0.7364	2.1126	1.1193	1.2798	1.13	2.7472	2.0391	2.4382	2.4322	1.5344	3.2777	2.3317	2.1617	1.9787	1.7095	1.9379	2.0549	1.5929	1.4476	1.7296	1.1469	1.0732	0.6385	0.8193	0.8389	1.3505	1.0097	1.2092	1.2326	1.3397	1.4561	2.059	1.7295	1.3534	1.01	0.728	0.5546	1.0444	0.9193	1.0449
1.83333	0.4933	0.5958	0.4379	0.5825	2.1223	2.035	1.2705	1.7247	0.6275	0.6988	2.2546	1.2156	1.2076	1.235	2.7908	2.0212	2.5094	2.4899	1.5599	3.0955	2.0513	2.1354	1.7232	1.6094	2.0425	1.7633	1.0714	1.4965	1.5235	1.2185	1.1174	0.5979	0.8241	0.7394	1.2975	1.2331	1.1785	1.2271	1.3262	1.2885	2.1209	1.8323	1.3376	0.9858	0.7766	0.534	0.9405	0.7336	0.9805
1.86667	0.3767	0.4648	0.4005	0.5514	2.1537	1.9183	1.3918	1.7789	0.6039	0.7254	1.9299	1.258	1.1584	1.2741	2.6959	1.9165	2.3125	2.3565	1.4699	2.9784	2.0439	2.2701	1.8162	1.6461	2.2156	1.7478	1.1423	1.309	1.5158	1.1165	1.1421	0.5944	0.8661	0.772	1.2495	1.0708	1.1176	1.2403	1.4379	1.1633	1.6964	1.8693	1.4958	0.9613	0.8415	0.5451	0.8787	0.6765	0.9323
1.9	0.2226	0.4709	0.3395	0.5201	1.9465	1.6856	1.2723	1.5286	0.6083	0.8284	1.7384	1.4069	1.1965	1.1979	2.6203	1.9098	2.2097	2.2266	1.3504	3.1126	2.0854	2.1803	1.8205	1.8466	2.2135	1.6626	0.997	1.5711	1.5309	1.112	1.2724	0.6622	0.7858	0.7226	1.2791	1.2465	1.0892	1.2963	1.3948	1.1672	1.4999	1.9562	1.509	1.0123	0.8597	0.4848	0.878	0.6786	1.0309
1.93333	0.1362	0.5076	0.4973	0.4669	2.0937	1.8317	1.2564	1.5617	0.6535	0.7957	1.8947	1.162	1.3022	1.1707	2.5892	1.953	2.1811	2.1499	1.3383	3.046	2.2772	2.2134	2.0542	1.9427	2.2198	1.5478	0.4375	1.4996	1.5733	0.9713	1.2344	0.568	0.7888	0.7093	1.2467	1.0466	1.0799	1.3336	1.4444	1.0158	1.4579	1.8615	1.5258	1.0322	0.8061	0.551	0.887	0.7353	1.1421
1.96667	0.1758	0.6213	0.5227	0.3537	2.3125	1.9377	1.3572	1.7529	0.6321	0.7116	2.0099	1.0332	1.2439	1.1608	2.492	1.9149	2.0147	2.0852	1.4888	2.8019	2.0496	2.1835	2.1632	1.9153	2.1718	1.4676	0.5401	1.3952	1.3221	0.9474	1.1641	0.4914	0.7283	0.687	1.3243	1.2605	1.079	1.4196	1.449	1.0205	1.3062	1.8289	1.4783	0.9385	0.7509	0.5723	0.925	0.7884	1.0762
2	0.1974	0.5231	0.4059	0.2667	1.9432	2.0325	1.4495	1.6521	0.6018	0.781	1.8968	1.0278	1.2746	1.1626	2.4871	1.9399	1.8356	2.0919	1.5603	2.599	2.0455	1.9918	2.0412	1.7514	2.0968	1.4858	0.5362	1.3898	1.2768	0.7296	1.1263	0.5388	0.6311	0.7026	1.2589	1.2718	1.0495	1.4241	1.393	1.2116	1.4187	1.9638	1.4541	0.896	0.7247	0.5333	0.929	0.7704	0.9778
2.03333	0.1503	0.5721	0.4237	0.3024	1.7129	2.0622	1.3975	1.5523	0.5716	0.8259	2.0808	0.9297	1.4271	1.3241	2.3465	1.9121	1.9323	2.1363	1.6041	2.6089	1.9358	2.0887	1.9686	1.69	1.9258	1.519	0.4454	1.4051	1.1878	1.0222	1.0912	0.5117	0.6265	0.6045	1.3051	1.294	0.9953	1.4947	1.4197	1.2394	1.3648	1.9162	1.4183	1.021	0.7646	0.4215	0.9081	0.746	0.9581
2.06667	0.1569	0.5234	0.409	0.443	1.8633	1.9997	1.3797	1.2574	0.4924	0.8713	1.5143	1.0206	1.4415	1.4291	2.3283	1.9497	1.8865	2.1183	1.4911	2.7782	1.8159	2.3096	2.0604	1.6675	1.8059	1.4838	0.5478	1.1823	1.1838	0.949	1.0789	0.4533	0.6141	0.6731	1.32	1.2552	1.0124	1.4587	1.4034	1.0659	1.434	1.8687	1.543	1.1646	0.7671	0.4109	0.8292	0.7325	0.9135
2.1	0.2568	0.6163	0.4156	0.3579	1.5928	1.9546	1.444	1.0606	0.4616	0.9362	1.3844	1.0314	1.555	1.3807	2.1404	1.9864	1.8288	1.9388	1.7719	2.7392	2.0466	2.3335	2.1322	1.7359	1.8323	1.6795	0.6799	1.2664	1.0101	0.9292	1.0982	0.5435	0.5898	0.5122	1.2841	1.2449	1.0891	1.3631	1.4448	1.0171	1.4717	1.7398	1.5462	1.3445	0.898	0.4676	0.6945	0.7936	0.8235
2.13333	0.1545	0.6877	0.4212	0.3474	1.5594	1.9208	1.3748	0.958	0.4955	0.8831	1.1216	1.0421	1.4863	1.327	2.0935	2.0662	1.9656	1.7142	1.4489	2.5145	2.1131	2.3098	2.0908	1.6316	1.8338	1.617	0.7785	1.3425	1.1107	0.5456	1.1742	0.5836	0.6906	0.5669	1.2963	1.2192	1.0325	1.4131	1.4603	1.1127	1.3109	1.6361	1.6453	1.2672	0.836	0.4171	0.5477	0.7944	0.8158
2.16667	0.1925	0.4312	0.5511	0.4074	1.8244	1.8791	1.3684	1.0381	0.5086	0.754	1.1733	0.8632	1.5071	1.3384	2.1573	2.0328	1.9609	1.5255	1.7315	2.8129	2.072	2.3323	1.6522	1.4508	1.6513	1.536	0.7884	1.2672	1.1277	0.5816	1.1231	0.5974	0.736	0.4496	1.2199	1.2363	0.9752	1.4338	1.476	1.1802	1.1918	1.4919	1.6641	1.2531	0.8249	0.4585	0.7361	0.7781	0.8856
2.2	0.191	0.1572	0.565	0.4594	1.8686	1.819	1.3	1.4012	0.5805	0.7486	1.5407	0.7732	1.5356	1.3255	2.1722	1.9141	1.8318	1.4723	1.6174	2.973	1.946	2.4396	1.4372	1.5235	1.5145	1.5726	0.6942	1.3043	1.2433	0.672	1.0852	0.63	0.6536	0.4039	1.1696	1.2096	0.978	1.3821	1.5012	1.1132	1.2559	1.5506	1.5853	1.1841	0.7285	0.5088	0.869	0.6815	0.9349
2.23333	0.286	0.2114	0.5125	0.4396	1.7338	1.6304	1.1965	1.391	0.6119	0.8124	1.5336	0.7835	1.5303	1.4204	2.0574	1.8824	1.6754	1.4745	1.7083	3.1683	1.9217	2.1499	1.5118	1.6879	1.4874	1.3579	0.5867	1.3695	1.4437	0.6991	0.9601	0.7124	0.6332	0.3284	1.139	1.2169	0.9398	1.241	1.3866	0.9308	1.4797	1.5155	1.5201	1.1892	0.6317	0.5961	0.9394	0.6147	0.895
2.26667	0.3229	0.2795	0.4873	0.4337	1.6772	1.4933	1.2085	1.2934	0.6104	0.8137	1.6831	0.8338	1.4665	1.2111	1.9696	1.9084	1.484	1.6503	1.6284	2.99	1.9508	2.1304	1.6373	1.5908	1.612	1.1665	0.6096	1.4026	1.43	0.81	0.8811	0.5972	0.5209	0.3881	1.1399	1.2235	0.9231	1.1529	1.4541	1.082	1.6158	1.3998	1.3638	1.172	0.6453	0.5082	0.9715	0.7224	0.803
2.3	0.3079	0.3292	0.4241	0.4419	1.7344	1.4986	1.3067	1.1638	0.5442	0.8021	1.5263	0.8625	1.5406	0.7735	1.876	1.9154	1.4118	1.5921	1.5141	2.9602	1.9088	2.0425	1.6619	1.6102	1.4489	1.102	0.6591	1.5447	1.2251	0.7159	0.9586	0.6171	0.4603	0.3719	1.139	1.0805	0.8603	1.1897	1.4734	1.0581	1.4402	1.3784	1.4003	1.1066	0.6612	0.5165	0.9851	0.709	0.6852
2.33333	0.3429	0.4122	0.3256	0.4088	1.766	1.5968	1.2345	0.9374	0.4965	0.7541	1.4877	0.6857	1.258	0.8384	1.7641	1.9607	1.4505	1.5261	1.4109	2.9746	1.9854	1.9635	1.6842	1.4204	1.4171	1.1508	0.6617	1.399	1.1911	0.6079	0.9259	0.5069	0.4173	0.3823	1.1358	1.0039	0.8244	1.189	1.5259	0.8817	1.299	1.3905	1.456	0.972	0.6606	0.5057	0.8893	0.6902	0.6556
2.36667	0.3196	0.3017	0.1842	0.3687	1.6606	1.566	1.0983	0.9968	0.4262	0.6697	1.3476	0.9033	1.0127	0.9697	1.8415	1.8755	1.5349	1.4577	1.6226	3.1098	2.0063	1.7987	1.8968	1.3103	1.342	1.0973	0.6921	1.1845	1.1636	0.6067	1.0034	0.5404	0.3691	0.4294	1.0858	0.916	0.8147	1.1794	1.4563	0.6573	1.4077	1.3879	1.4987	0.9625	0.7639	0.4832	0.829	0.61	0.6541
2.4	0.3201	0.2764	0.2071	0.5496	1.6549	1.7972	1.0831	1.0303	0.3811	0.669	1.5443	0.8095	0.8491	0.9431	1.7306	1.7473	1.4209	1.4959	1.372	3.3221	2.0417	1.5395	2.1202	1.3532	1.3576	1.1923	0.5159	1.1248	1.2059	0.7418	0.9959	0.4667	0.4132	0.4521	1.0873	0.9785	0.8564	1.2356	1.4468	0.7071	1.4475	1.3949	1.6819	0.9567	0.836	0.4588	0.9258	0.5649	0.5999
2.43333	0.3846	0.2312	0.2982	0.4515	1.6699	1.8015	0.9573	0.9868	0.3874	0.6415	1.4286	0.7507	0.832	0.8396	1.7298	1.7721	1.4609	1.4812	1.483	3.1868	1.832	1.6557	1.8691	1.3301	1.357	1.3739	0.5018	1.09	1.2428	0.787	0.9813	0.4602	0.422	0.4137	1.1669	1.0422	0.8641	1.2282	1.3899	0.76	1.5093	1.3583	1.5984	0.9375	0.7397	0.5338	0.9571	0.5452	0.57
2.46667	0.3515	0.387	0.4335	0.416	1.6635	1.7103	0.8846	1.0458	0.379	0.6761	1.5721	0.8055	0.8139	0.7872	1.8118	1.6415	1.3913	1.4408	1.6356	3.1894	1.8107	1.6934	1.9256	1.2756	1.4306	1.4201	0.4718	0.9472	1.2356	0.7523	0.9925	0.6757	0.4231	0.3639	1.1596	1.0389	0.8595	1.1844	1.4327	0.9013	1.5162	1.1919	1.5469	0.8736	0.753	0.5555	0.8885	0.5344	0.699
2.5	0.3261	0.5244	0.5103	0.3573	1.5654	1.7942	0.977	1.1734	0.3418	0.5782	1.8164	1.0022	0.8698	0.7884	1.8633	1.5635	1.4284	1.4265	1.5649	2.8394	1.8276	1.8848	1.7304	1.1489	1.4418	1.3548	0.4765	1.0163	1.2097	0.8472	0.9368	0.6157	0.3505	0.2507	1.2243	1.0193	0.9479	1.1913	1.5164	1.0327	1.4202	1.1893	1.5098	0.8708	0.6951	0.6185	0.8325	0.556	0.7814
2.53333	0.2746	0.5223	0.493	0.4097	1.4325	1.6306	1.0475	1.1976	0.3411	0.5785	1.8404	0.8964	0.9731	0.7314	1.8478	1.719	1.4421	1.4906	1.5036	3.0352	1.8485	1.7993	1.9404	1.1747	1.51	1.1424	0.4196	1.2679	1.1967	0.7537	0.9161	0.72	0.3605	0.2344	1.1969	0.9826	0.9268	1.2008	1.4175	1.0093	1.2724	1.2534	1.4386	0.834	0.6825	0.6127	0.7789	0.5028	0.7644
2.56667	0.2952	0.4393	0.6114	0.5117	1.4528	1.6561	1.0991	1.2316	0.293	0.6572	1.9595	0.9549	0.9457	0.6694	1.7864	1.6225	1.3312	1.6112	1.7753	3.1643	1.6971	1.7766	1.9868	1.2303	1.4971	1.0656	0.2885	1.2722	1.3456	0.7207	0.9524	0.7295	0.3417	0.2359	1.2082	0.9573	0.9189	1.1835	1.2504	0.8523	1.2461	1.2926	1.4345	0.8571	0.8077	0.5496	0.6185	0.4686	0.7044
2.6	0.2574	0.396	0.6007	0.5434	1.2816	1.6172	1.0952	1.1805	0.3201	0.644	2.1126	0.9165	0.8377	1.0066	1.7661	1.6405	1.2601	1.4185	1.5046	3.2514	1.7156	1.7461	2.057	1.4535	1.4525	1.0478	0.2844	1.2573	1.2284	0.9463	0.9815	0.66	0.3393	0.2481	1.2533	0.9965	0.9026	1.1428	1.1145	0.8845	1.145	1.3422	1.422	0.8828	0.7047	0.4836	0.683	0.4964	0.632
2.63333	0.3067	0.4624	0.6782	0.4196	1.1447	1.5439	1.0872	1.118	0.2854	0.6033	1.9549	0.9328	0.8063	1.1301	1.7858	1.6286	1.3019	1.3951	1.3099	2.8899	1.758	1.8212	1.7941	1.5526	1.4736	1.0546	0.2747	1.2457	1.1172	0.9073	0.9032	0.5783	0.2906	0.2876	1.1597	1.0187	0.8487	1.1502	0.9862	1.0367	1.1787	1.3178	1.4289	0.795	0.6524	0.4155	0.7028	0.5691	0.5805
2.66667	0.2555	0.5075	0.6536	0.4288	1.2434	1.5362	1.0978	1.0045	0.3985	0.6605	1.841	0.9209	0.9445	0.7452	1.6608	1.5458	1.2676	1.3984	1.2829	2.7852	1.7018	1.9526	1.5951	1.3736	1.4938	1.0174	0.2426	1.0973	1.7599	1.0445	0.9766	0.5855	0.2624	0.3355	1.155	1.0401	0.8199	1.1589	1.0253	1.1007	1.1047	1.2855	1.491	0.8022	0.6452	0.3107	0.6674	0.6213	0.643
2.7	0.3029	0.5773	0.6875	0.4297	1.3938	1.6152	1.0345	1.0158	0.336	0.6729	2.1571	0.9896	0.9726	0.8114	1.6205	1.5006	1.4351	1.389	1.2003	2.5605	1.6565	1.8019	1.5626	1.2982	1.5186	0.9533	0.3314	1.0415	1.0432	0.7891	0.8809	0.6299	0.21	0.3584	1.1404	1.0024	0.8918	1.196	1.0076	1.0611	1.012	1.3004	1.4704	0.7483	0.6154	0.283	0.6685	0.5668	0.7354
2.73333	0.2895	0.567	0.7269	0.5103	1.439	1.7232	1.135	0.9699	0.3654	0.6185	1.984	1.0797	0.9375	0.7962	1.77	1.4762	1.2995	1.3719	1.2063	2.49	1.7008	1.5756	1.4936	1.4146	1.471	0.867	0.3621	1.0253	0.2694	0.5115	0.9454	0.4345	0.223	0.3354	1.121	1.0356	0.9159	1.1385	1.0276	1.0807	1.0115	1.266	1.5531	0.7834	0.6455	0.3892	0.6415	0.4743	0.6766
2.76667	0.2655	0.5127	0.63	0.5382	1.6902	1.598	1.163	1.0644	0.3048	0.6284	2.086	1.0804	0.9455	0.9451	1.7732	1.4675	1.2582	1.3088	1.4199	2.7781	1.7844	1.5401	1.3156	1.4091	1.2903	0.774	0.3313	1.0844	1.0006	0.609	1.0064	0.587	0.274	0.4399	1.1714	1.0183	0.9429	1.1031	1.034	1.0073	0.9595	1.2463	1.6633	0.8196	0.6358	0.4512	0.758	0.3899	0.717
2.8	0.2442	0.549	0.67	0.529	1.471	1.5714	1.041	1.2972	0.3174	0.6911	2.0844	1.0371	0.9604	0.6591	1.669	1.5111	1.2997	1.4346	1.3461	2.5584	1.7673	1.6197	1.2926	1.4998	1.5123	0.9777	0.2628	0.9368	1.1053	0.7779	1.0053	0.5996	0.2208	0.4927	1.221	1.0187	1.0056	1.0635	1.0282	0.9488	0.8844	1.1516	1.7804	0.872	0.6027	0.3426	0.8441	0.4174	0.6896
2.83333	0.2776	0.4651	0.5449	0.565	1.4127	1.611	0.8984	1.142	0.3927	0.5171	2.1633	1.079	0.8514	0.3593	1.5573	1.4689	1.3567	1.371	1.3718	2.3378	1.8231	1.5833	1.3481	1.4466	1.7303	1.0984	0.2291	0.7961	1.3331	0.7767	1.034	0.6777	0.2156	0.4171	1.1617	0.9613	0.9446	0.9645	1.0819	0.9844	0.8977	1.2962	1.6345	0.8773	0.5807	0.2979	0.8176	0.5269	0.744
2.86667	0.2417	0.4138	0.5911	0.5455	1.1298	1.5289	0.9178	0.9873	0.4566	0.5624	2.0242	1.0686	1.0534	0.3426	1.5836	1.3667	1.2577	1.404	1.4521	2.3318	1.5859	1.6874	1.2251	1.4722	1.8557	1.3756	0.3149	0.8797	1.436	0.6306	0.9232	0.6456	0.226	0.4333	1.1202	0.9855	0.8562	0.9215	1.1439	0.9688	1.0119	1.2885	1.5666	0.8901	0.6425	0.2949	0.7088	0.4833	0.8069
2.9	0.2043	0.4293	0.4777	0.4637	1.0102	1.3928	1.0118	0.9507	0.414	0.5336	2.0049	1.268	1.0818	0.5978	1.6517	1.3231	1.2011	1.3362	1.3997	2.4456	1.4697	1.7754	1.1293	1.4436	1.7942	1.3208	0.2983	0.8669	1.4741	0.6887	0.892	0.77	0.2161	0.4856	1.0616	1.0002	0.7982	0.928	1.2564	1.0812	1.0907	1.2789	1.499	0.842	0.6031	0.2497	0.6941	0.5008	0.8055
2.93333	0.208	0.3635	0.3697	0.4635	1.1631	1.3965	1.0573	0.9705	0.5124	0.5414	2.0852	1.3258	1.1045	0.7891	1.6622	1.3839	1.1554	1.5147	1.5972	2.2365	1.5423	1.5367	1.1751	1.3987	1.7545	1.0172	0.198	0.9237	1.3295	0.6704	0.9601	0.7591	0.1731	0.5296	1.0035	0.952	0.6994	0.9202	1.0705	1.064	1.1158	1.2718	1.58	0.8107	0.6336	0.3024	0.7886	0.5296	0.5403
2.96667	0.3153	0.408	0.3738	0.4455	1.0834	1.4006	1.06	0.9811	0.6123	0.5595	2.0264	1.242	1.1191	0.8156	1.6323	1.3647	1.0661	1.4914	1.673	2.2654	1.6687	1.568	1.2888	1.2849	1.5506	1.0344	0.4118	0.9218	1.4424	0.8977	0.9511	0.7984	0.2755	0.61	0.9324	0.9409	0.6949	0.9487	0.9617	1.185	1.0773	1.2108	1.409	0.8237	0.6815	0.2245	0.7114	0.4862	0.4823
3	0.3386	0.4221	0.2918	0.4795	1.2206	1.3843	1.01	0.9733	0.5455	0.4433	1.6306	1.1473	1.0411	0.6991	1.475	1.2598	1.1033	1.424	1.4881	2.4332	1.6794	1.5713	1.2103	1.1168	1.4381	1.1385	0.5033	0.9679	1.2936	1.1072	0.9506	0.7764	0.3267	0.5643	0.9567	1.0084	0.6888	0.9671	0.9203	1.1609	1.0734	1.0957	1.3576	0.8248	0.633	0.2333	0.597	0.5179	0.5604
3.03333	0.3331	0.4181	0.4823	0.4534	1.0422	1.528	0.9349	1.0391	0.4725	0.4507	1.4691	1.0954	1.0193	0.7397	1.4914	1.1635	1.1486	1.4811	1.7021	2.4845	1.5842	1.2816	1.4371	1.111	1.5091	1.1249	0.5915	0.9544	0.9681	0.8157	0.9099	0.8374	0.287	0.4774	0.9708	0.9426	0.6296	0.9787	0.9425	1.0478	0.9378	0.9077	1.4601	0.8455	0.722	0.1958	0.5779	0.4272	0.6401
3.06667	0.3135	0.4338	0.8514	0.5255	1.1639	1.4851	0.9546	1.0105	0.3563	0.4113	1.2943	1.1008	1.014	0.6286	1.3336	1.2033	1.1263	1.5515	1.8075	2.4134	1.515	1.2038	1.4762	1.1686	1.4967	1.1958	0.7622	0.9699	0.88	0.6467	0.974	0.8075	0.1573	0.4811	1.0108	1.0549	0.6566	1.0634	0.9075	1.1474	0.7768	0.8666	1.318	0.8479	0.6757	0.1746	0.6072	0.4188	0.6082
3.1	0.251	0.329	0.604	0.3705	1.2635	1.3657	0.9927	1.0154	0.2851	0.3262	1.225	0.8864	1.1543	0.6087	1.2369	1.2909	1.1387	1.5607	1.7329	2.1955	1.6614	1.1916	1.3716	1.2464	1.6769	1.0209	0.6968	0.9449	1.0717	0.6169	1.0418	0.6982	0.1722	0.455	0.9602	1.019	0.6357	0.9807	1.0422	1.0547	0.7335	0.9079	1.2457	0.8715	0.8211	0.1955	0.5702	0.651	0.7393
3.13333	0.2997	0.1762	0.5201	0.378	1.2181	1.2788	0.9092	0.9845	0.2714	0.3261	1.0972	1.0044	1.0869	0.5611	1.3357	1.224	1.2126	1.4259	1.5968	2.0952	1.6855	1.291	1.408	1.0013	1.6502	1.0401	0.6178	0.94	1.3656	0.4971	0.9933	0.6546	0.1241	0.387	0.8476	1.1312	0.5939	0.9708	0.9442	1.0988	0.7977	0.7943	1.3647	0.9179	0.8878	0.1303	0.5122	0.5623	0.7257
3.16667	0.2922	0.2546	0.3263	0.4442	1.3256	1.3307	0.6628	0.9214	0.2644	0.3082	0.9873	0.9555	1.2102	0.5538	1.3523	1.183	1.187	1.1714	1.6239	2.1167	1.7595	1.4008	1.3915	0.921	1.5745	1.0544	0.4804	0.9612	1.0237	0.3866	1.0186	0.6538	0.1555	0.4266	0.8382	1.0521	0.6134	0.943	1.0408	1.1105	0.8865	0.7849	1.6381	0.8544	0.8357	0.1281	0.5291	0.3109	0.7288
3.2	0.3007	0.2516	0.3413	0.4227	1.2133	1.2801	0.6971	0.8704	0.2513	0.2508	1.0062	1.0006	1.2072	0.5229	1.507	1.1728	1.2215	1.12	1.7964	2.1114	1.6931	1.5593	1.3288	0.8782	1.6776	0.9288	0.5635	0.8751	0.9956	0.3231	0.9964	0.6224	0.2154	0.4311	0.799	1.0372	0.6114	0.8443	1.1256	1.1723	0.9285	0.7651	1.6831	0.668	0.8086	0.0988	0.571	0.4364	0.5361
3.23333	0.3308	0.2647	0.3407	0.4155	1.1906	1.3487	0.668	0.957	0.2562	0.2909	1.1213	1.1324	1.1682	0.4715	1.6384	1.1565	1.3294	1.2917	1.7432	2.2031	1.6481	1.7402	1.0155	0.9025	1.7121	0.9184	0.5451	0.8142	0.9085	0.4464	0.9501	0.6773	0.176	0.3465	0.8095	1.1153	0.5851	0.8636	1.1059	1.2137	1.0403	0.7883	1.5794	0.807	0.7993	0.0959	0.6154	0.4819	0.3993
3.26667	0.2916	0.2555	0.1993	0.4253	1.1389	1.2561	0.6433	0.9679	0.2723	0.2918	1.1971	1.0885	1.0741	0.5584	1.5265	1.2178	1.5131	1.308	1.6387	2.2238	1.6084	1.5859	1.0048	0.8879	1.6144	0.969	0.5599	0.7618	0.858	0.5329	0.9115	0.703	0.21	0.3857	0.8194	1.0768	0.6177	0.9631	1.2101	1.1442	0.9889	0.828	1.4552	0.9649	0.7824	0.1174	0.6326	0.336	0.4863
3.3	0.3387	0.2599	0.1898	0.5039	1.3294	1.2339	0.639	0.9983	0.2508	0.2414	1.3731	1.0198	1.1524	0.5959	1.497	1.2454	1.1446	1.2999	1.458	2.2455	1.7607	1.5797	1.1702	0.8178	1.5585	0.8889	0.4511	0.7998	0.7742	0.5669	0.9622	0.7694	0.1544	0.4429	0.7586	1.0566	0.6726	1.0105	1.1165	1.0504	0.9701	0.8149	1.4119	0.9175	0.8639	0.1255	0.5943	0.3523	0.6062
3.33333	0.2958	0.3235	0.3683	0.3732	1.3136	1.3199	0.7886	0.9607	0.235	0.1855	1.2782	0.9754	1.0871	0.5254	1.5027	1.3584	0.9657	1.5643	1.7085	2.1482	1.7362	1.5828	1.2514	0.8552	1.641	1.0814	0.413	0.838	0.8338	0.4209	0.9419	0.8965	0.2277	0.5002	0.8161	1.0735	0.6805	0.9838	1.0338	0.9083	1.0255	0.9467	1.4861	0.9749	0.8598	0.1682	0.5185	0.421	0.6795
3.36667	0.2992	0.3356	0.5936	0.275	1.2215	1.2003	0.5963	0.8141	0.302	0.2478	1.1243	0.9765	1.0046	0.4104	1.4853	1.4188	1.0034	1.3823	1.6926	2.0403	1.6899	1.4877	1.3705	0.9652	1.5655	1.0589	0.4966	0.8927	0.901	0.6594	0.8414	0.85	0.2654	0.3948	0.8351	0.9836	0.7041	1.1326	0.9433	0.772	1.1478	0.8649	1.5819	1.1648	0.8161	0.1519	0.4385	0.5902	0.4566
3.4	0.3217	0.2746	0.5503	0.3359	1.1962	1.1422	0.7252	0.8717	0.322	0.2488	1.161	1.0029	1.0193	0.4984	1.3295	1.3891	1.0529	1.405	1.6958	1.8028	1.6594	1.3447	1.3788	1.2602	1.5526	0.9693	0.7154	0.8484	1.0347	0.4891	0.7714	0.8035	0.3113	0.4423	0.8779	0.9818	0.7217	1.046	0.8932	0.8864	1.0841	0.7199	1.5131	0.9963	0.7405	0.1482	0.6862	0.5779	0.4551
3.43333	0.3178	0.1428	0.5345	0.3034	1.0904	1.1744	0.6798	0.8038	0.3537	0.29	1.1812	1.0516	0.9599	0.3965	1.3088	1.2686	0.9849	1.2905	1.4662	1.9705	1.7627	1.3117	1.1534	1.2652	1.5589	1.0785	1.0141	0.8524	1.0396	0.5371	0.7903	0.9514	0.3085	0.3849	0.9612	0.963	0.6901	1.0384	0.9381	0.8571	1.2769	0.8327	1.5165	0.982	0.7935	0.1806	0.5269	0.5964	0.4923
3.46667	0.3132	0.2545	0.5069	0.2464	1.0576	1.1909	0.7166	0.7224	0.3243	0.289	1.1406	1.0956	0.9602	0.312	1.3603	1.1988	0.9928	1.3028	1.0825	2.0776	1.8528	1.3932	1.1658	1.1301	1.5967	1.0857	0.9536	0.8055	1.0081	0.4736	0.7999	0.8282	0.3489	0.3337	0.9516	1.0109	0.6286	0.8948	1.0743	0.9691	1.3361	0.8525	1.5487	0.8738	0.7814	0.1989	0.5012	0.4985	0.5473
3.5	0.3148	0.4247	0.4444	0.2378	1.1286	1.1492	0.7001	0.745	0.3248	0.4024	1.2363	1.113	1.0491	0.299	1.434	1.1797	1.0477	1.3206	1.017	2.3115	1.7232	1.3607	1.0897	0.9887	1.7455	1.1921	1.0228	0.8179	1.1026	0.4675	0.8565	0.8748	0.2769	0.3801	0.9163	1.0602	0.6338	0.9509	1.1384	1.0549	1.2509	0.9293	1.5001	0.9381	0.7789	0.1764	0.4777	0.4611	0.5158
3.53333	0.2943	0.6009	0.4033	0.346	1.1641	1.3072	0.6385	0.8019	0.2903	0.4335	1.3163	1.1321	0.9944	0.2938	1.5386	1.304	1.0432	1.411	1.1374	2.3166	1.5333	1.4737	1.2638	0.8166	1.6321	1.1596	0.8029	0.8579	1.1364	0.4457	0.8698	0.8693	0.2006	0.3667	0.9038	1.0561	0.5782	0.954	1.2398	1.0024	1.3409	0.9331	1.622	1.0062	0.648	0.2526	0.6052	0.4844	0.5356
3.56667	0.3338	0.5886	0.4204	0.2645	1.3349	1.3211	0.6149	0.8548	0.2386	0.4277	1.1572	1.2016	0.9813	0.3926	1.2018	1.2954	1.1587	1.3824	1.1908	2.3382	1.4737	1.6125	1.1014	0.8379	1.6907	1.0029	0.6376	0.7458	1.0837	0.4883	0.8403	0.9358	0.1733	0.3354	0.9744	1.0317	0.5808	1.0212	1.121	0.8402	1.444	0.9442	1.56	0.7819	0.5938	0.3444	0.5109	0.4773	0.4982
3.6	0.347	0.5485	0.4445	0.288	1.4006	1.2607	0.5751	0.7852	0.164	0.3394	1.153	1.0515	0.9844	0.4572	1.1045	1.2893	1.1308	1.1902	1.2464	2.5719	1.3636	1.4241	1.0869	0.7801	1.6874	0.8648	0.687	0.7862	1.1334	0.6061	0.8855	0.7813	0.1626	0.2384	1.0281	1.0306	0.5618	1.0791	1.0477	0.9094	1.2046	0.9282	1.5193	0.8503	0.6059	0.4156	0.5241	0.415	0.5863
3.63333	0.4054	0.4428	0.4812	0.1966	1.2726	1.1155	0.7524	0.8098	0.1876	0.2407	1.3563	0.9944	1.0563	-0.0209	1.1676	1.3073	1.1727	1.1322	1.242	2.8126	1.3661	1.3786	1.182	1.0471	1.5855	0.7527	0.6391	0.8651	1.2163	0.7313	0.91	0.9136	0.1568	0.2447	0.9369	1.0657	0.5909	1.1532	1.1502	0.9742	1.2489	0.7901	1.4483	0.7764	0.4806	0.4637	0.563	0.3622	0.5799
3.66667	0.2807	0.3104	0.5364	0.1805	1.323	1.0516	0.8136	0.7952	0.2548	0.2309	1.1168	1.1633	1.082	0.5387	1.1905	1.2063	1.1314	1.2174	1.1955	2.5052	1.3607	1.3544	1.1535	1.26	1.5426	0.8248	0.5741	0.8341	1.1956	0.8275	0.831	0.8912	0.1839	0.2416	0.9442	0.9528	0.6295	1.1505	1.0644	0.8417	1.288	0.7872	1.3266	0.6754	0.4546	0.4202	0.5458	0.3572	0.5102
3.7	0.2642	0.4134	0.5786	0.249	1.3932	1.0877	0.756	0.8488	0.2737	0.2641	0.853	1.222	1.1537	0.5261	1.2354	1.3192	1.1624	1.2721	1.1443	2.355	1.2244	1.4115	1.134	1.3242	1.5522	0.8078	0.5399	0.8311	1.1435	0.771	0.8058	0.8538	0.2157	0.2466	0.9658	0.9048	0.6362	1.1718	1.0788	0.903	1.2737	0.8091	1.1969	0.6598	0.4747	0.3908	0.6517	0.3184	0.5123
3.73333	0.1912	0.345	0.456	0.3262	1.5627	1.0764	0.8489	0.6515	0.2983	0.3385	0.9221	0.955	1.0888	0.6309	1.2557	1.414	1.1238	1.2845	1.1111	2.4526	1.1579	1.3013	1.4071	1.1535	1.5589	0.901	0.5767	0.8487	1.069	0.684	0.7672	0.776	0.2576	0.2372	0.8967	0.9164	0.61	1.1936	1.2711	0.8973	1.2179	0.7208	1.1783	0.5957	0.4214	0.3187	0.584	0.2541	0.5834
3.76667	0.1538	0.3282	0.4283	0.3271	1.4661	1.0009	0.8513	0.7252	0.3322	0.3627	0.8387	0.7133	1.0692	0.6363	1.2052	1.3788	1.0502	1.2641	1.043	2.4431	1.1798	1.3999	1.349	1.0113	1.5028	1.1404	0.5931	0.848	0.9597	0.6778	0.766	0.7649	0.2209	0.2846	0.9247	0.8603	0.6119	1.1572	1.2209	0.892	1.1538	0.7291	1.2922	0.4359	0.3716	0.3058	0.6252	0.2354	0.6706
3.8	0.2041	0.3539	0.3984	0.2191	1.4862	1.0493	0.6874	0.8436	0.39	0.3464	0.7184	0.5253	1.0733	0.6303	1.1617	1.3121	1.026	1.1911	0.723	2.4392	1.379	1.4263	1.303	1.0034	1.274	1.148	0.5853	0.8623	0.851	0.6141	0.7793	0.675	0.2678	0.2468	0.9305	0.8753	0.6213	1.1535	1.1228	0.7619	1.0437	0.7867	1.2817	0.3683	0.3272	0.3524	0.6288	0.2866	0.5557
3.83333	0.2118	0.323	0.4355	0.2392	1.2655	1.063	0.6631	0.9466	0.4073	0.335	0.6414	0.5817	1.0895	1.2766	1.1578	1.3391	1.0045	1.1225	0.9539	2.585	1.5558	1.5551	1.2709	1.1372	1.3378	1.0879	0.6314	0.8828	0.7726	0.5664	0.6854	0.7134	0.3015	0.2766	0.8787	0.8685	0.6623	1.0787	1.0059	0.8732	0.9572	0.841	1.2718	0.481	0.3556	0.3106	0.4894	0.6175	0.5956
3.86667	0.2536	0.3498	0.3583	0.2601	1.2063	0.8621	0.6035	0.9998	0.3515	0.304	0.7988	0.6062	1.1225	0.9609	1.0193	1.2743	1.0044	1.0569	1.2763	2.6882	1.4997	1.4296	1.1199	1.0768	1.3035	1.1143	0.5921	0.9409	0.8484	0.6407	0.743	0.7026	0.3243	0.23	0.9275	0.8844	0.6504	0.93	1.0221	0.9493	1.0471	0.9585	1.4142	0.6638	0.3705	0.3079	0.5104	0.5265	0.3985
3.9	0.2778	0.4161	0.4004	0.1798	1.0579	0.966	0.5938	1.1077	0.433	0.2927	0.7216	0.6488	1.2454	0.5539	0.9323	1.3693	1.0445	1.1267	1.212	2.7691	1.3331	1.4118	1.0458	1.0641	1.2506	1.0907	0.6268	0.9356	0.8789	0.8039	0.6959	0.6586	0.3344	0.2483	0.9069	0.9173	0.6272	0.902	1.0832	0.7805	1.2029	1.0054	1.5092	0.7909	0.3569	0.3064	0.508	0.4221	0.497
3.93333	0.2568	0.4669	0.4328	0.1568	0.829	1.0492	0.6603	1.1832	0.4443	0.2352	0.6966	0.5171	0.9292	0.5816	1.0782	1.3506	0.8622	1.125	0.979	2.8013	1.1782	1.4376	0.928	0.9652	1.3585	1.1274	0.5498	0.9682	0.8607	0.8955	0.6386	0.6566	0.3517	0.2492	0.9498	0.9013	0.6452	0.9974	1.1214	0.8834	1.2507	0.6899	1.6111	0.9349	0.3482	0.2321	0.5845	0.3084	0.4759
3.96667	0.176	0.509	0.5137	0.2611	0.8791	1.1192	0.6671	1.1265	0.3705	0.2552	0.8247	0.4881	0.9058	0.5314	1.1112	1.3094	0.9059	1.069	0.8666	2.7116	1.3766	1.3681	0.9305	0.9792	1.3751	1.2325	0.6024	0.8535	0.9042	0.9503	0.5999	0.6046	0.3747	0.1826	0.8655	0.8827	0.6286	0.9933	0.993	0.9082	1.1761	0.5817	1.3659	0.8439	0.4037	0.2677	0.4491	0.2483	0.6228
4	0.2235	0.5413	0.4993	0.3607	1.0035	1.0726	0.6667	1.129	0.3163	0.3249	0.9071	0.5034	1.0193	0.4748	1.1117	1.209	0.9737	1.083	0.7872	2.561	1.3625	1.3185	0.9235	1.1304	1.3073	1.2598	0.3903	0.7655	0.8606	0.9328	0.6058	0.4998	0.3974	0.1488	0.8399	0.9607	0.6167	0.9506	1.047	0.8605	1.1829	0.4316	1.6066	0.9529	0.4944	0.2594	0.3859	0.2565	0.8935
4.03333	0.2015	0.6293	0.4588	0.3972	1.0021	1.0213	0.6963	1.1582	0.3397	0.5276	0.8832	0.6385	1.0055	0.4996	1.0921	1.2384	0.991	0.9891	0.7316	2.3932	1.1361	1.4028	0.8822	1.2202	1.3157	1.2061	0.4317	0.6745	0.8422	0.8587	0.5638	0.4856	0.42	0.1858	0.8113	0.9047	0.5983	0.9751	1.0209	0.9204	1.1286	0.4881	1.5667	0.7067	0.5045	0.2718	0.3876	0.2626	0.6721
4.06667	0.187	0.6991	0.3775	0.4113	0.9686	1.0832	0.7756	0.9954	0.3086	0.3709	0.9151	0.6226	0.954	0.4164	1.0029	1.3179	0.9533	1.0936	0.7742	2.4191	1.1192	1.4216	0.846	1.1028	1.3622	1.1937	0.4095	0.7034	0.8735	0.8791	0.5178	0.4932	0.4204	0.1949	0.7901	0.9107	0.5966	0.9111	1.0738	0.7421	1.0841	0.5946	1.4438	0.7007	0.5307	0.2687	0.4013	0.2511	0.5729
4.1	0.1398	0.5724	0.4194	0.2804	1.0529	1.0779	0.6861	1.0374	0.2218	0.3465	1.0319	0.6318	0.9797	0.3802	1.1963	1.329	0.7878	1.1526	0.8339	2.3708	1.3566	1.4331	0.705	1.1592	1.3434	1.2328	0.3984	0.7823	0.9364	0.7805	0.5602	0.5935	0.3129	0.2536	0.8018	0.8885	0.6806	0.859	1.0899	0.7258	1.2177	0.7504	1.6489	0.7866	0.5153	0.2469	0.4449	0.2353	0.658
4.13333	0.1556	0.6159	0.4459	0.3745	1.0917	1.0794	0.7152	1.0271	0.1542	0.4269	1.0587	0.6358	0.9199	0.5834	1.0923	1.366	0.9374	1.1704	0.9074	2.513	1.395	1.4966	1.078	1.1855	1.3137	1.1834	0.4429	0.8098	0.9419	0.7174	0.6587	0.5082	0.239	0.168	0.7757	0.9049	0.6265	0.8299	1.0413	0.7416	1.2164	0.6791	1.5601	0.7505	0.5603	0.3136	0.4465	0.2196	0.6162
4.16667	0.2341	0.5922	0.3691	0.4185	1.1883	1.1007	0.7197	1.0826	0.1205	0.5248	1.1646	0.7401	0.8453	0.4889	0.9609	1.1885	0.9133	1.1629	0.9601	2.316	1.3887	1.4238	1.0092	0.9675	1.3708	1.0919	0.5466	0.8105	1.0108	0.6527	0.5998	0.6671	0.2512	0.0944	0.8198	0.8589	0.6171	0.9141	1.0094	0.6885	1.0385	0.6509	1.6346	0.8386	0.6825	0.3183	0.4869	0.2338	0.6477
4.2	0.3403	0.6674	0.3278	0.3578	1.4457	1.0725	0.6672	1.0559	0.1189	0.6144	0.994	0.7803	0.8526	0.5061	0.8724	1.3072	0.9076	1.1151	0.8999	2.302	1.1911	1.2918	0.9099	0.9601	1.5967	1.0822	0.7032	0.601	0.7891	0.7163	0.5786	0.7008	0.2357	0.0868	0.8619	0.9128	0.5898	0.942	0.9547	0.7591	1.1036	0.5577	1.5491	0.9189	0.5748	0.3434	0.5745	0.1751	0.6273
4.23333	0.3565	0.6579	0.3341	0.3769	1.5113	1.0139	0.7353	0.9703	0.1395	0.4305	0.9943	0.699	0.9308	0.7526	0.9121	1.3217	0.7925	1.2267	0.8845	2.372	1.1782	1.1789	0.9778	0.9262	1.6779	1.0977	0.668	0.5731	0.9043	0.6885	0.6849	0.7021	0.2319	0.1932	0.9546	0.9277	0.602	0.9524	0.9985	0.89	1.103	0.4847	1.6317	0.9329	0.4909	0.3734	0.5533	0.1451	0.5856
4.26667	0.2327	0.6257	0.3909	0.4264	1.4505	0.9734	0.7489	0.914	0.1973	0.4159	0.9178	0.7068	1.2026	0.6851	0.9643	1.2811	0.8025	1.264	1.0834	2.445	1.0716	1.1968	0.7548	0.9139	1.6335	1.1249	0.4552	0.648	0.9703	0.7136	0.7265	0.7117	0.21	0.1922	0.906	0.8987	0.5832	0.9535	1.1268	0.9351	1.1422	0.3695	1.6093	0.9183	0.5369	0.3782	0.5586	0.203	0.5586
4.3	0.167	0.6211	0.5726	0.3242	1.4401	1.1722	0.7511	0.9749	0.108	0.4929	0.9168	0.5618	0.9682	0.6066	0.9009	1.2538	0.7772	1.2427	0.91	2.4708	1.0611	1.062	0.7654	0.8543	1.5212	1.1367	0.4868	0.5997	0.9651	0.6011	0.6361	0.6178	0.1387	0.1835	0.9472	0.946	0.5416	0.9122	1.1748	0.8846	1.0644	0.3856	1.4866	0.8561	0.4763	0.3472	0.5446	0.248	0.5055
4.33333	0.1754	0.4993	0.3832	0.4108	1.3481	1.1355	0.7409	0.9424	0.0942	0.4414	0.828	0.6167	0.9676	0.5692	0.9411	1.2948	0.7334	1.2509	0.7495	2.4294	1.1326	1.0681	0.899	0.7543	1.5008	1.1469	0.3822	0.6155	1.0939	0.4678	0.7758	0.5424	0.1519	0.2114	0.8678	0.9407	0.5529	0.9141	1.0038	0.8375	1.1301	0.4811	1.313	0.7589	0.4023	0.3062	0.5706	0.2528	0.434
4.36667	0.1564	0.3892	0.3645	0.3577	1.3491	1.2379	0.764	0.9992	0.1006	0.3871	1.0156	0.6069	0.8895	0.681	1.0513	1.3533	0.9173	1.1546	0.6749	2.4674	1.1523	0.9519	0.8628	0.7715	1.692	1.1614	0.367	0.693	1.0085	0.4395	0.6716	0.7055	0.1469	0.2611	0.8797	0.8678	0.5488	0.8554	0.9964	0.8233	1.0514	0.4889	1.4345	0.7901	0.4526	0.3133	0.5089	0.1568	0.4008
4.4	0.1506	0.364	0.3788	0.2276	1.3352	1.3063	0.7063	0.993	0.0923	0.4112	0.9992	0.5827	0.8856	0.6136	1.0625	1.2863	0.7696	1.16	0.8034	2.5755	1.2095	0.9725	0.862	1.0223	1.5242	1.0482	0.3151	0.765	0.9618	0.4993	0.6724	0.8096	0.1244	0.3827	0.9521	0.8766	0.5524	0.8659	0.9835	0.8197	0.9836	0.4978	1.4632	0.8969	0.4295	0.258	0.4351	0.1846	0.5279
4.43333	0.1376	0.3838	0.4906	0.2978	1.3459	1.1677	0.7616	1.114	0.0571	0.4351	0.86	0.5858	0.9551	0.5644	1.1134	1.2834	0.8204	1.1916	0.8206	2.4638	1.2329	1.1313	0.7973	0.9134	1.5357	1.2765	0.374	0.8324	0.7794	0.6528	0.6324	0.8757	0.1327	0.3624	0.9565	0.8161	0.5654	0.9021	0.9696	0.8514	0.945	0.5063	1.469	0.7285	0.5325	0.2911	0.4709	0.2005	0.5068
4.46667	0.1442	0.46	0.4261	0.2967	1.4109	1.1224	0.7596	1.1578	0.0622	0.4454	0.6715	0.6085	1.0926	0.4357	1.0749	1.1663	0.8389	1.2214	1.0316	2.2317	1.2039	1.1698	0.6687	0.8457	1.4473	0.9648	0.3958	0.7591	0.8152	0.7907	0.6961	0.8826	0.1662	0.2583	0.9699	0.8138	0.5722	0.9354	1.0664	0.7988	1.0337	0.4915	1.3168	0.7867	0.5676	0.3127	0.4318	0.2366	0.473
4.5	0.1543	0.3928	0.3473	0.3772	1.3073	0.9617	0.7624	1.1546	0.1149	0.4465	0.5407	0.6416	0.9175	0.5568	0.9685	1.1852	0.9142	1.1572	1.0251	2.2439	1.3168	1.0968	0.8212	0.8862	1.3815	0.9716	0.3971	0.7059	0.7858	0.8469	0.6111	0.8522	0.2206	0.2088	0.9345	0.8147	0.5673	0.9837	1.1459	0.7082	1.0396	0.536	1.4298	0.9169	0.5726	0.2261	0.5049	0.2396	0.5151
4.53333	0.1672	0.3891	0.4834	0.4393	1.3559	1.0265	0.7608	1.1619	0.1617	0.3359	0.7101	0.595	0.8467	0.542	0.9377	1.0568	0.9328	1.1132	0.8469	2.3068	1.2916	1.2053	0.5198	0.7722	1.4575	0.9079	0.3618	0.7603	0.8336	0.8625	0.7015	0.7982	0.206	0.1595	0.9092	0.8192	0.6018	1.0184	1.1515	0.7267	0.8956	0.4527	1.4401	0.8871	0.5214	0.2028	0.4197	0.2442	0.5293
4.56667	0.1706	0.4583	0.5178	0.3528	1.0798	1.0073	0.7731	1.043	0.2072	0.2311	0.9572	0.7027	0.8504	0.6087	0.8411	0.9569	0.936	1.0455	0.5663	2.4187	1.1329	1.2229	0.5091	0.7683	1.3699	1.1115	0.3094	0.7507	0.7671	0.8043	0.6945	1.1084	0.1638	0.1753	0.967	0.8538	0.5412	0.9455	1.1759	0.5276	0.8319	0.3563	1.2484	0.9133	0.5316	0.1935	0.3797	0.2482	0.4985
4.6	0.1879	0.5426	0.5269	0.3516	1.0332	1.0046	0.907	1.1924	0.1885	0.225	0.9149	0.5637	0.8825	0.5744	0.8381	0.9048	0.8431	1.0847	0.6684	2.2519	1.1158	1.2254	0.5272	0.6652	1.3823	1.0525	0.3838	0.9183	0.872	0.874	0.6867	0.9759	0.0709	0.289	0.9552	0.8934	0.5274	0.9427	1.0262	0.7196	0.9541	0.5576	1.2479	0.9444	0.5049	0.161	0.3728	0.2358	0.5614
4.63333	0.1318	0.5848	0.5132	0.2737	1.1866	1.0637	0.9115	1.1114	0.1647	0.2411	1.0242	0.6119	0.6879	0.6069	1.0162	0.9753	0.8673	1.1317	0.9757	2.3438	1.1079	1.2768	0.4898	0.7532	1.4564	0.7662	0.4535	0.879	0.8767	0.8752	0.631	0.9291	0.0915	0.2992	0.9647	0.8921	0.5616	0.8545	0.9823	0.7696	0.9138	0.4908	1.1535	0.7889	0.504	0.1368	0.4848	0.2802	0.5606
4.66667	0.1296	0.5479	0.4396	0.2724	1.1183	1.1711	0.786	1.0325	0.1063	0.292	0.9946	0.5775	0.5577	0.6209	0.9494	0.9546	0.9329	1.0526	1.1776	2.2258	1.3561	1.3062	0.7908	0.7949	1.2764	0.8298	0.5286	0.8903	0.9227	0.602	0.6534	0.9775	0.0155	0.1927	1.0211	0.8858	0.5976	0.811	0.9513	0.7316	0.8584	0.4776	1.3999	0.8548	0.5153	0.2262	0.4839	0.253	0.6201
4.7	0.1392	0.6599	0.3955	0.3782	1.0676	1.2584	0.6762	0.9488	0.1277	0.3325	0.8524	0.5247	0.5148	0.5949	1.0117	0.9211	0.9117	1.0982	1.1796	2.4249	1.2606	1.2232	0.9268	0.673	1.2401	0.9065	0.3902	0.8428	0.8566	0.5314	0.6678	0.7072	0.0806	0.2993	1.0277	0.8962	0.6586	0.7426	0.8823	0.8393	0.8663	0.4464	1.2997	0.9186	0.5546	0.2384	0.4694	0.2344	0.5359
4.73333	0.1409	0.5104	0.4309	0.4124	1.0247	1.2355	0.5754	0.9781	0.1267	0.3994	0.7554	0.5208	0.4599	0.6038	1.0358	0.9126	0.9887	1.11	1.2298	2.4616	1.3289	1.2656	0.9668	0.7321	1.1634	0.7687	0.3497	0.9521	0.8148	0.5096	0.5994	0.9276	0.1056	0.2227	1.0447	0.853	0.6493	0.7965	0.9397	0.8103	0.8428	0.495	0.9649	0.9081	0.562	0.1938	0.4375	0.2255	0.5713
4.76667	0.15	0.4043	0.4287	0.3588	0.9756	1.2625	0.6022	0.9655	0.1714	0.4679	0.8481	0.6813	0.5185	0.6715	0.9894	0.9645	1.0204	1.0408	1.3616	2.308	1.356	1.3728	0.9088	0.8125	1.2931	0.8413	0.3102	0.8336	0.715	0.7473	0.5338	0.8308	0.1303	0.3036	1.0386	0.8406	0.6403	0.8481	0.9801	0.8832	0.8979	0.5515	1.229	0.9576	0.5088	0.1387	0.4792	0.2225	0.6449
4.8	0.1113	0.3215	0.5023	0.2975	0.917	1.1508	0.7579	1.132	0.1622	0.446	0.937	0.819	0.5736	0.6947	1.0459	0.9872	0.9908	1.1261	1.4824	2.4262	1.3035	1.4054	1.0272	0.8411	1.2844	0.9521	0.1459	0.7543	0.6583	0.5249	0.5345	0.7857	0.1089	0.2557	1.015	0.8036	0.6771	0.9009	0.966	0.8414	0.7689	0.5511	1.1085	0.9159	0.5286	0.1117	0.5609	0.2943	0.8074
4.83333	0.1023	0.3595	0.5392	0.5325	1.0145	1.1848	0.7588	1.0097	0.1972	0.4631	0.7659	0.8851	0.6479	0.6409	1.125	1.1074	0.9601	1.245	1.4341	2.5541	1.2548	1.3553	1.1751	0.9892	1.222	0.8682	0.2328	0.6509	0.6409	0.5398	0.5441	0.779	0.0858	0.3026	1.0544	0.8452	0.6523	0.877	0.9596	0.827	0.7268	0.4915	1.1301	0.8437	0.5455	0.1252	0.4967	0.4709	0.5684
4.86667	0.0955	0.3718	0.475	0.3481	1.2166	1.0306	0.6897	0.9658	0.1475	0.4712	0.767	0.877	0.7145	0.5341	1.167	1.1657	1.0337	1.3903	1.3119	2.465	1.3151	1.4541	1.0756	0.9238	1.2178	0.9455	0.3174	0.5862	0.6223	0.4653	0.567	0.7916	0.0986	0.2973	0.9948	0.882	0.6949	0.8369	0.9239	0.724	0.7569	0.431	1.1115	0.9641	0.4762	0.2447	0.6182	0.2887	0.4954
4.9	0.0735	0.4219	0.3631	0.2742	1.4292	1.0207	0.5157	1.009	0.1379	0.4733	1.0174	0.7875	0.8474	0.5893	1.1497	1.1699	1.0252	1.4184	1.3402	2.2281	1.5562	1.3847	0.9775	0.9048	1.1483	0.8969	0.2582	0.5456	0.6418	0.4995	0.628	0.7343	0.0588	0.3108	0.9905	0.86	0.637	0.8245	0.9102	0.838	0.7003	0.3403	1.2019	0.8872	0.4767	0.2747	0.6224	0.1989	0.4335
4.93333	0.0485	0.4053	0.4319	0.2288	1.1731	1.0803	0.5359	0.9602	0.1327	0.4883	1.0536	0.7525	0.7649	0.6236	1.1911	1.1744	1.0525	1.2841	1.5432	2.2293	1.5771	1.4255	0.7619	0.9037	1.2058	0.8448	0.2589	0.5039	0.735	0.4559	0.6387	0.7026	0.1084	0.3321	0.9062	0.8282	0.6469	0.784	0.9863	0.8663	0.7033	0.3372	1.268	0.8553	0.4967	0.24	0.6211	0.1206	0.3875
4.96667	0.0402	0.4846	0.4173	0.182	1.1949	1.0596	0.5232	0.7473	0.1927	0.4554	1.1559	0.7661	0.7937	0.633	1.173	1.22	0.9613	1.0856	1.7187	2.2047	1.5158	1.2599	0.7026	1.0049	1.1828	0.9971	0.4843	0.5589	0.8797	0.6995	0.6259	0.6732	0.1307	0.283	0.8401	0.8341	0.6693	0.788	0.8875	0.8048	0.8026	0.4488	1.2706	0.9376	0.5374	0.1873	0.6064	0.1911	0.3982
5	0.0056	0.4905	0.3747	0.2835	1.124	0.957	0.5702	0.7629	0.163	0.401	0.9002	0.8548	0.8709	0.6412	1.0788	1.1519	0.9493	1.2192	1.8238	2.2063	1.403	1.385	0.6973	1.0812	1.2196	1.1066	0.1349	0.5132	0.797	0.7064	0.6578	0.6015	0.082	0.2062	0.7505	0.8121	0.6293	0.7418	0.9074	1.0154	0.741	0.4765	1.2601	0.7725	0.5496	0.1188	0.7246	0.2464	0.364
5.0333	0.0524	0.4443	0.4018	0.2983	0.9662	0.9416	0.5658	0.604	0.2218	0.4667	0.9372	0.8626	0.9182	0.6023	1.0353	1.0813	0.9729	1.2514	1.7111	2.1561	1.7186	1.4049	0.6853	0.997	1.1527	1.1391	0.602	0.3675	0.7544	0.6737	0.633	0.5597	0.0982	0.1961	0.7337	0.8233	0.6287	0.7852	0.8581	0.9944	0.7479	0.3946	1.1866	0.8917	0.5314	0.1472	0.5968	0.3215	0.3741
5.0667	0.0564	0.2971	0.3493	0.2139	0.9108	1.0628	0.4815	0.729	0.1411	0.4519	0.873	0.7975	0.9547	0.6447	0.9756	1.0285	1.0244	1.2987	1.5269	2.0487	1.3004	1.564	0.6317	0.8003	1.2249	1.1074	0.4059	0.4306	0.7406	0.6784	0.6046	0.6158	0.1302	0.1558	0.7671	0.806	0.6178	0.8291	0.9463	0.9856	0.8173	0.3922	1.0085	0.8257	0.514	0.2571	0.4824	0.4075	0.4296
5.1	0.0867	0.2963	0.3614	0.2117	0.9413	0.9623	0.5188	0.7344	0.0836	0.4737	0.9143	0.7669	0.7974	0.6663	0.8397	1.012	1.0741	1.244	1.2757	2.15	1.3975	1.5181	0.6934	0.872	1.2981	1.2054	0.2583	0.5273	0.5853	0.6768	0.5347	0.5214	0.1259	0.1516	0.7781	0.8268	0.6185	0.932	0.9978	0.8488	0.7354	0.3913	0.8984	0.8217	0.4658	0.4929	0.4999	0.444	0.3641
5.1333	0.0756	0.3568	0.3711	0.3666	0.9195	0.8651	0.5682	0.8905	0.1277	0.5379	0.8937	0.8341	0.8541	0.6531	0.8781	0.9124	0.9691	1.2408	1.1195	2.2386	1.5025	1.3755	0.8277	0.7197	1.2653	1.199	0.3671	0.5477	0.5437	0.5455	0.5278	0.5371	0.0968	0.2122	0.7291	0.8943	0.6207	0.8956	0.9099	0.7507	0.6508	0.3255	0.888	0.8231	0.4704	0.3284	0.495	0.3717	0.3139
5.1667	-0.0098	0.406	0.3559	0.4902	1.0801	0.9755	0.7487	0.6936	0.1725	0.5637	0.8491	0.8376	0.8592	0.7604	1.0302	0.8989	1.0301	1.2514	1.1092	2.0903	1.6921	1.3692	0.7822	0.6599	1.1672	1.117	0.3964	0.4626	0.6042	0.8612	0.5008	0.5721	0.1294	0.1967	0.7504	0.9023	0.6725	0.9372	0.8265	0.7236	0.7539	0.3193	0.8734	0.7916	0.441	0.2449	0.5817	0.3139	0.2996
5.2	-0.0145	0.4474	0.2141	0.537	1.0003	1.0124	0.685	0.5882	0.2099	0.4961	0.7692	0.7343	0.7661	0.6577	1.1078	0.8296	1.0026	1.2493	0.9205	2.0819	1.768	1.4213	0.7885	0.6303	1.1333	1.2877	0.3216	0.5008	0.5667	0.6836	0.5015	0.5996	0.1842	0.2003	0.8391	0.8378	0.6365	0.9585	0.7434	0.7436	0.7245	0.3617	0.8736	0.7793	0.4744	0.2952	0.5917	0.2673	0.3124
5.2333	0.0932	0.445	0.196	0.4093	0.9976	1.0766	0.6515	0.5816	0.2059	0.3695	0.6854	0.7477	0.6471	0.5499	1.1431	0.9043	0.9505	1.1196	1.0069	1.8834	1.6795	1.4335	0.9624	0.7503	1.0716	1.183	0.2757	0.523	0.629	0.2888	0.5112	0.5847	0.2043	0.1667	0.8892	0.8649	0.6404	0.9969	0.7578	0.7511	0.6151	0.4009	0.8462	0.7889	0.4628	0.382	0.5898	0.2419	0.3364
5.2667	0.1639	0.4258	0.1903	0.2969	0.8937	1.0689	0.7302	0.5648	0.1956	0.412	0.4929	0.7436	0.723	0.5735	1.1079	0.8699	0.9142	1.0371	0.7833	2.0215	1.4857	1.3242	1.0989	0.6828	1.1428	1.1906	0.2444	0.482	0.6823	0.3516	0.5072	0.7276	0.2326	0.1597	0.8728	0.8036	0.6269	0.8654	0.7747	0.7746	0.5057	0.4502	0.9116	0.7382	0.4828	0.3269	0.5294	0.2298	0.3554
5.3	0.0735	0.4103	0.2211	0.3035	0.8492	1.077	0.7281	0.6958	0.1561	0.3754	0.5947	0.8046	0.7672	0.5069	0.9934	0.8924	0.9127	1.0572	0.9538	2.0479	1.3437	1.3814	1.0429	0.6679	1.2066	1.0833	0.2492	0.4234	0.6602	0.5355	0.5015	0.6791	0.2016	0.162	0.8942	0.7419	0.6466	0.8872	0.7779	0.8867	0.405	0.5723	0.9681	0.7246	0.469	0.2589	0.4877	0.2106	0.3378
5.3333	0.0714	0.3435	0.2846	0.318	0.7907	1.2228	0.6861	0.6781	0.1944	0.4047	0.5395	0.7622	0.7723	0.4117	1.0749	0.9077	0.8681	1.03	1.5981	2.0613	1.4783	1.464	1.0622	0.7042	1.1979	1.2624	0.3559	0.5031	0.6024	0.5043	0.479	0.7248	0.2322	0.1935	0.8555	0.8068	0.6349	0.8934	0.8212	0.814	0.4541	0.4799	1.0166	0.7311	0.5007	-0.0178	0.4097	0.1501	0.3362
5.3667	0.1564	0.3478	0.4595	0.3364	0.9158	1.2356	0.6224	0.6846	0.3033	0.4099	0.4168	0.7846	0.9022	0.5899	0.9904	0.9764	1.1601	1.1691	1.6432	1.9383	1.3751	1.3224	1.1124	0.6581	1.1374	1.2009	0.3906	0.5822	0.5583	0.4718	0.4906	0.579	0.2905	0.2575	0.8129	0.8832	0.6364	0.8187	0.8759	0.6111	0.5947	0.4914	0.9596	0.8227	0.6076	0.2587	0.3953	0.0945	0.3274
5.4	0.1538	0.365	0.5453	0.3899	1.1043	1.0643	0.711	0.6758	0.2616	0.3954	0.5474	0.8319	0.9567	0.6249	1.0972	0.9445	1.0422	1.1167	1.5274	1.7223	1.3698	1.2328	1.0745	0.6378	1.0106	1.0851	0.444	0.5331	0.7187	0.578	0.5033	0.5174	0.2969	0.2978	1.0612	0.883	0.6251	0.9446	0.8522	0.8017	0.5636	0.4444	0.9344	0.8483	0.569	0.337	0.322	0.1377	0.3093
5.4333	0.0982	0.2503	0.3986	0.3572	1.192	1.024	0.6721	0.7702	0.1871	0.3712	0.5871	0.7261	0.9048	0.601	1.1215	1.0363	1.0122	1.0807	1.3165	1.7398	1.3997	1.259	1.0754	0.6353	1.0366	1.0426	0.5498	0.4063	0.6389	0.57	0.5417	0.5128	0.2716	0.1772	0.7672	0.8627	0.6032	0.9068	0.6762	0.7422	0.5373	0.4511	0.8731	0.8753	0.5431	0.3893	0.3728	0.1836	0.4272
5.4667	0.0484	0.2059	0.4043	0.3233	1.201	0.983	0.5917	0.8277	0.176	0.4457	0.7574	0.6528	0.8627	0.6413	1.0686	1.0234	0.9075	1.1773	1.3499	1.8914	1.4087	1.2197	1.0202	0.6601	0.9984	1.0934	0.5548	0.6123	0.5441	0.4276	0.5304	0.597	0.1962	0.2136	0.7455	0.8362	0.6174	0.9809	0.8096	0.7819	0.6299	0.4714	0.9561	0.7615	0.4134	0.4084	0.4218	0.1191	0.4609
5.5	0.0457	0.2375	0.4792	0.2224	1.1985	0.9848	0.525	0.8532	0.2189	0.4271	0.6057	0.648	0.7947	0.7094	0.9589	0.9902	0.9358	1.115	1.2331	1.9097	1.4537	1.1637	0.921	0.7906	1.0869	1.0584	0.5113	0.689	0.4426	0.4575	0.5096	0.4694	0.2123	0.1322	0.8142	0.8622	0.5991	0.8859	0.9054	0.9243	0.6025	0.4128	0.774	0.7435	0.3525	0.2984	0.4652	0.1537	0.2859
5.5333	0.0347	0.2158	0.614	0.2998	1.1951	0.97	0.449	0.6176	0.2438	0.3605	0.7005	0.6576	0.8079	0.7351	0.9631	1.0729	0.8916	1.0386	1.445	1.7245	1.3047	1.1838	0.9875	0.8973	1.0132	0.9542	0.6375	0.8379	0.3985	0.3403	0.4779	0.3681	0.2907	0.1505	0.8705	0.8811	0.5582	0.817	0.9283	0.9786	0.6653	0.3348	0.9033	0.7858	0.4074	0.3283	0.4782	0.1443	0.2753
5.5667	0.0087	0.1462	0.6254	0.4604	1.0129	1.0539	0.4677	0.6334	0.2765	0.3377	0.6494	0.6167	0.9573	0.8708	0.9661	1.0781	0.8324	1.0187	1.355	1.9175	1.4041	1.4099	0.8886	0.9189	1.0712	1.0025	0.7208	0.7478	0.372	0.3614	0.5263	0.3028	0.2697	0.2136	0.8722	0.8044	0.5517	0.817	0.9151	0.9845	0.7102	0.3973	0.9656	0.7913	0.3819	0.2106	0.4687	0.2477	0.337
5.6	0.0363	0.1306	0.5484	0.3577	1.0568	1.1266	0.5025	0.6194	0.2862	0.378	0.6062	0.6829	0.9349	0.7222	1.0355	0.9791	0.798	0.9719	1.2968	1.8824	1.2745	1.1217	0.9811	0.9848	1.0535	1.1097	0.8008	1.0276	0.4276	0.3064	0.5914	0.3183	0.2693	0.1969	0.5779	0.818	0.5548	0.8858	1.0703	0.8756	0.6801	0.1315	0.9546	0.879	0.3359	0.182	0.5595	0.1667	0.4129
5.6333	0.1228	0.0802	0.3894	0.2837	1.0578	0.9112	0.5369	0.6384	0.3269	0.2108	0.6342	0.7579	1.1266	0.7206	1.0778	1.0557	0.822	1.027	1.2623	2.1102	1.3714	1.2631	0.9007	1.0862	1.1441	1.2286	0.7399	0.8932	0.5243	0.2916	0.4675	0.2029	0.2439	0.1935	0.4381	0.7286	0.5954	0.899	0.9951	0.8522	0.666	0.5074	1.1263	0.8449	0.3771	0.1687	0.6624	0.2192	0.381
5.6667	0.0394	0.0686	0.3949	0.3511	1.0209	0.9321	0.5546	0.7643	0.2951	0.1875	0.6782	0.8378	1.0219	0.6239	0.9671	1.0292	0.767	0.999	1.5673	2.0734	1.2556	1.3013	1.0015	1.0712	1.1577	1.1365	0.7231	0.8284	0.6673	0.3232	0.445	0.3081	0.2442	0.1901	0.778	0.6637	0.6257	0.925	0.917	0.732	0.6238	0.7522	0.9698	0.8101	0.3406	0.2642	0.7463	0.4033	0.4542
5.7	0.0574	0.0986	0.4047	0.3776	1.2056	0.9246	0.6082	0.8564	0.2668	0.1908	0.7658	0.7029	0.7345	0.598	0.9458	0.9447	0.6643	1.1014	1.5468	1.8459	1.4757	1.3236	1.0151	1.0763	1.1752	1.1333	0.6634	0.7505	0.5237	0.391	0.4105	0.3358	0.3018	0.222	0.7992	0.7323	0.6715	0.9474	0.8763	0.7159	0.7109	0.4277	1.139	0.7627	0.3768	0.3147	0.6344	0.7102	0.5129
5.7333	0.0644	0.2491	0.4097	0.2589	1.298	0.8849	0.5957	0.9604	0.3339	0.3253	0.712	0.6616	0.5898	0.5596	0.9982	0.9597	0.6095	1.11	1.272	2.0247	1.4954	1.2993	0.8909	1.1493	1.1452	1.0164	0.7186	0.7633	0.4926	0.682	0.4424	0.2875	0.2879	0.2473	0.8901	0.7079	0.7375	0.941	0.8789	0.6893	0.5762	0.4044	1.2228	0.7072	0.3447	0.2753	0.6112	0.7617	0.4687
5.7667	0.0364	0.479	0.3586	0.2436	0.9563	0.8744	0.565	0.6314	0.3445	0.5131	0.8801	0.6974	0.6196	0.7067	0.9693	0.9088	0.6016	1.1064	1.1206	2.0862	1.4442	1.3354	0.8516	1.227	1.0742	0.9279	0.7805	0.5651	0.5252	0.5071	0.457	0.3481	0.2641	0.2457	0.9043	0.6531	0.7401	0.9648	0.9002	0.7221	0.6578	0.471	1.1736	0.7029	0.3647	0.269	0.6851	0.5826	0.5683
5.8	0.0129	0.3842	0.3895	0.2951	0.8756	0.7812	0.6265	0.5657	0.302	0.2722	0.8429	0.6342	0.6637	0.7458	0.9055	0.9867	0.5899	1.0243	0.9578	1.9956	1.4618	1.1877	0.9539	1.1468	1.0731	1.0387	0.822	0.6265	0.5999	0.3314	0.4943	0.4158	0.2815	0.2383	0.8903	0.6619	0.7066	1.019	0.9508	0.9559	0.7147	0.3938	1.3014	0.6693	0.4123	0.3046	0.6644	0.5108	0.624
5.8333	-0.0013	0.4414	0.4339	0.2173	0.9397	0.9523	0.6334	0.6353	0.3817	0.3191	0.9263	0.7073	0.7554	0.6457	0.8552	1.1006	0.616	0.9327	1.0551	1.7662	1.6546	1.0775	0.8089	0.9454	1.0543	0.8845	0.9091	0.6986	0.4205	0.6269	0.4449	0.3496	0.2483	0.2797	0.9142	0.772	0.6913	0.9784	0.9471	0.7052	0.6059	0.4271	1.4306	0.8684	0.3779	0.3293	0.6236	0.5293	0.683
5.8667	0.0163	0.3008	0.399	0.1718	0.9611	0.7955	0.6161	0.6532	0.3857	0.4122	0.9597	0.7441	0.7758	0.5652	0.8514	1.2613	0.6265	0.9562	1.0734	1.5708	1.4399	1.0677	0.5979	0.8855	1.1805	0.8089	0.9407	0.6373	0.3446	0.588	0.439	0.2821	0.2457	0.2674	0.94	0.6849	0.6691	1.1122	0.9337	0.5811	0.6289	0.424	1.5524	0.9509	0.3885	0.3878	0.6307	0.5094	0.565
5.9	0.0255	0.4027	0.3274	0.2691	1.0827	0.8299	0.4932	0.7625	0.3554	0.4142	0.9205	0.6795	0.8491	0.6382	0.8546	1.1469	0.6856	0.966	0.9384	1.4327	1.3371	1.1634	0.5701	1.0179	1.1577	0.8335	0.9371	0.7193	0.3532	0.3699	0.4313	0.2961	0.2165	0.2864	0.8208	0.6348	0.5989	0.9624	0.8974	0.7342	0.7099	0.5826	1.5494	0.8165	0.3847	0.3436	0.6759	0.5668	0.5233
5.9333	0.072	0.2813	0.31	0.2635	1.2166	0.8721	0.5011	0.811	0.2441	0.3606	0.7686	0.7341	0.8137	0.6591	1.1108	1.1967	0.6776	1.0176	0.9122	1.5193	1.268	1.0282	0.3833	0.9856	0.9864	1.1915	0.8839	0.7029	0.4022	0.4635	0.4218	0.3017	0.2298	0.2829	0.854	0.6633	0.59	0.9318	0.9284	0.8576	0.6288	0.5147	1.5168	0.7653	0.3481	0.4518	0.6003	0.511	0.6485
5.9667	0.1382	0.1849	0.3274	0.3332	1.4397	0.8343	0.5784	0.8479	0.3391	0.3403	0.5889	0.6656	0.7138	0.6693	1.2148	1.0486	0.7082	1.1739	0.8143	1.5829	1.4021	1.0176	0.4436	1.184	0.8965	1.2213	0.9481	0.611	0.4362	0.5872	0.3113	0.228	0.2239	0.2837	0.8825	0.7677	0.5994	0.9409	0.9545	1.0718	0.7198	0.4597	1.3764	0.8122	0.3754	0.4216	0.5134	0.4072	0.7434
6	0.1172	0.2153	0.3764	0.3486	1.2817	0.7938	0.5869	0.8807	0.3277	0.2968	0.5599	0.6991	0.635	0.5908	1.1373	1.0802	0.8372	1.0623	0.7433	1.6214	1.541	1.0733	0.4696	1.2237	1.0176	1.0736	0.7896	0.5694	0.3645	0.5948	0.3335	0.1702	0.1703	0.2552	0.8422	0.8246	0.6315	0.9305	0.9538	1.0513	0.7518	0.4053	1.3218	0.8639	0.4257	0.3665	0.53	0.2974	0.6385
6.0333	0.1218	0.3052	0.3657	0.3489	1.067	0.8497	0.5779	0.8737	0.3214	0.3645	0.6004	0.672	0.6035	0.6207	1.1399	0.9708	0.5175	0.9899	0.5804	1.5145	1.6867	1.1482	0.6535	1.1181	1.0307	0.8236	0.7831	0.4733	0.435	0.4723	0.4475	0.1985	0.2805	0.2826	0.7928	0.9106	0.6268	0.8928	0.9321	1.0959	0.671	0.3625	1.2075	0.8665	0.3898	0.2717	0.5124	0.2985	0.7141
6.0667	0.1141	0.3309	0.3783	0.3666	1.0397	0.9258	0.6717	0.9102	0.2618	0.3573	0.6257	0.7037	0.7614	0.6151	1.1549	0.9344	0.5646	0.8816	0.5897	1.2862	1.1773	1.1371	0.8811	1.0284	0.8558	0.8555	0.6674	0.4939	0.4785	0.6422	0.452	0.2818	0.3031	0.2866	0.7897	0.8553	0.5947	0.9837	0.8835	0.9821	0.7256	0.3461	1.1361	0.8623	0.4515	0.2581	0.4821	0.2612	0.6332
[truncated: 418 more rows]
[truncated: 84 more columns]

## Sheet: Figure 3D
Empty-split	SS81353	SS81521	MB011B
0.232109	0.123328	0.284601	0.977285
0.389081	0.119128	0.214776	0.407297
0.545804	0.251111	0.0385747	0.792515
[truncated: 63 more rows]

## Sheet: Figure 3E-F
Time (s)	Empty-split	Empty-split	Empty-split	Empty-split	Empty-split	Empty-split	Empty-split	Empty-split	Empty-split	Empty-split	Empty-split	Empty-split	Empty-split	Empty-split	Empty-split	Empty-split	Empty-split	Empty-split	Empty-split	Empty-split	Empty-split	Empty-split	Empty-split	Empty-split	Empty-split	Empty-split	Empty-split	Empty-split	Empty-split	Empty-split	Empty-split	Empty-split	Empty-split	Empty-split	Empty-split	Empty-split	Empty-split	Empty-split	Empty-split	Empty-split	Empty-split	Empty-split	Empty-split	Empty-split	Empty-split	Empty-split	Empty-split	Empty-split	Empty-split
[truncated: 751 more rows]
[truncated: 89 more columns]

[truncated: 4 more sheets: Figure 3G, Figure 3H Test1, Figure 3H Test2, Figure 3I]
